# Supplementary material
Source: PubMed Central journal article supplement (PMC4227542)

# **A Universal Isocyanide for diverse Heterocycle syntheses.**

<sup>1</sup> Pravin Patil, <sup>1</sup> Kareem Khoury<sup>2</sup>, Eberhardt Herdtweck,<sup>3</sup> Alexander Dömling<sup>1\*</sup>

<sup>1</sup> Department of Drug Design, University of Groningen, A. Deusinglaan 1, 9713 AV Groningen, The Netherlands.

<sup>2</sup> Carmolex Inc, Pittsburgh, Pennsylvania 15213, United States.

<sup>3</sup> Technische Universität München, Garching, Germany.

[a.s.s.domling@rug.nl](mailto:a.s.s.domling@rug.nl)

|                                                                                                    |      |
|----------------------------------------------------------------------------------------------------|------|
| Supporting Information                                                                             | S-1  |
| General Methods                                                                                    | S-2  |
| General experimental procedure for Ugi-tetrazoles                                                  | S-2  |
| General experimental procedure for cyclization                                                     | S-3  |
| Computational Chemical Descriptors                                                                 | S-30 |
| Xray-Crystallographic Information                                                                  | S-33 |
| Characterization of Products (MS, <sup>1</sup> H NMR and <sup>13</sup> C NMR spectra of compounds) | S-45 |

## Experimental section

### 1. General methods

Nuclear magnetic resonance spectra (NMR) were recorded on a Bruker Avance 500 spectrometer ( $^1\text{H}$  NMR (500 MHz),  $^{13}\text{C}$  NMR (126 MHz)). Chemical shifts for  $^1\text{H}$  NMR were reported as  $\delta$  values and coupling constants were in hertz (Hz). The following abbreviations were used for spin multiplicity: s = singlet, d = doublet, t = triplet, dd = double doublet, m = multiplet, bs = broad singlet. Chemical shifts for  $^{13}\text{C}$  NMR reported in ppm relative to the solvent peak. Thin layer chromatography was performed on Fluka precoated silica gel plates (0.20 mm thick, particle size 25  $\mu\text{m}$ ). Flash chromatography was performed on a Teledyne ISCO Combiflash Rf, using RediSep Rf Normal-phase Silica Flash Columns (Silica Gel 60  $\text{\AA}$ , 230 - 400 mesh). Reagents were available from commercial suppliers and used without any purification unless otherwise noted. All isocyanides were made in house by either performing the Hoffman or Ugi procedure. Other reagents were purchased from Sigma Aldrich, ABCR, Acros and AK Scientific and were used without further purification. Mass spectra (HRMS) were recorded on an Orbitrap XL (Thermo Fisher Scientific; ESI pos. mode, resolution of 60000@m/z 400). Electrospray ionization mass spectra (ESI-MS) were recorded on a Waters Investigator Semi-prep 15 SFC-MS instrument.

#### Synthetic procedure A (Ugi reaction):

To a 1 M solution of aldehyde in methanol were added successively 1.0 equiv of amine, 1.0 equiv of azidotrimethylsilane, and 1.0 equiv of isocyanoacetaldehydedimethylacetal. The resulting mixture was stirred at room temperature for 18 hrs. The solvent was removed under reduced pressure and the residue was purified using flash chromatography to obtain the Ugi-product.

#### Synthetic procedure B (cyclization):

To a solution of Ugi-tetrazole (1 mmol) was stirred with methanesulfonic acid (100 mmol) at room temperature for 18 hours. The reaction was diluted with dichloromethane and quenched with saturated sodium bicarbonate solution at 0-5  $^{\circ}\text{C}$  and extracted with dichloromethane (20 mL x 3). The solvent was removed under reduced pressure, and the residue was purified by flash column chromatography to afford cyclic product.

**Synthetic procedure C (Pictet–Spengler cyclization):**

To a solution of Ugi-tetrazole(1 mmol) was stirred with methanesulfonic acid (100mmol) at room temperature for 18 hours. The reaction was quenched with saturated sodium carbonate and extracted with EtOAc (20 mL x3). The solvent was removed under reduced pressure, and the residue was purified by crystallization or flash column chromatography to afford cyclic product.

*In all the cases, the spectral data are given for the major diastereomer.*

**8a: N-((1-(2,2-dimethoxyethyl)-1H-tetrazol-5-yl)(4-nitrophenyl)methyl)-2-(4-methoxyphenyl)ethanamine.**

The product was obtained using procedure **A**, 814 mg, 92 % as pale yellow

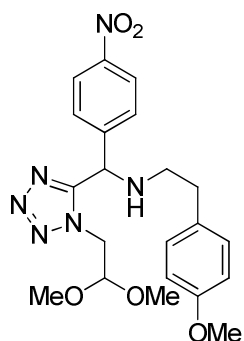

liquid; HRMS (ESI)  $m/z$  calcd for  $C_{21}H_{27}N_6O_5$   $[M+H]^+$  : 443.2037; found: 443.20361;  $^1H$  NMR (500 MHz,  $CDCl_3$ )  $\delta$  8.19 (d,  $J = 8.6$  Hz, 2H), 7.52 (d,  $J = 8.6$  Hz, 2H), 7.07 (d,  $J = 8.5$  Hz, 2H), 6.82 (d,  $J = 8.5$  Hz, 2H), 5.38 (s, 1H), 4.61 (t,  $J = 5.4$  Hz, 1H), 4.43 (dd,  $J = 14.1, 5.0$  Hz, 1H), 4.34 (dd,  $J = 14.1, 5.0$  Hz, 1H), 3.78 (s, 3H), 3.36 (s, 3H), 3.28 (s, 3H), 2.84 – 2.69 (m, 4H), 2.08 (brs, 1H);  $^{13}C$  NMR (126 MHz,  $CDCl_3$ )  $\delta$  158.1, 155.6, 147.6, 145.0, 131.0, 129.5, 128.6, 123.8, 113.8, 102.6, 56.3, 55.7, 55.5, 55.1, 49.2, 48.9, 35.1.

**2a: 7-(4-methoxyphenethyl)-8-(4-nitrophenyl)-7,8-dihydro-7H-tetrazolo[1,5-a]pyrazine.**

The product was obtained using procedure **B**, 230 mg, 61 % as brown liquid;

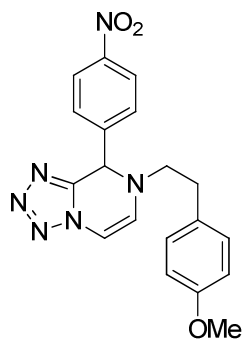

HRMS (ESI)  $m/z$  calcd for  $C_{19}H_{19}N_6O_3$   $[M+H]^+$  : 379.1513; found: 379.1514;  $^1H$  NMR (500 MHz,  $CDCl_3$ )  $\delta$  8.21 (d,  $J = 8.6$  Hz, 2H), 7.52 (d,  $J = 8.6$  Hz, 2H), 6.97 (d,  $J = 8.4$  Hz, 2H), 6.79 (d,  $J = 8.4$  Hz, 2H), 6.59 (d,  $J = 5.6$  Hz, 1H), 6.19 (d,  $J = 5.6$  Hz, 1H), 6.03 (s, 1H), 3.78 (s, 3H), 3.43 (dt,  $J = 14.1, 6.9$  Hz, 1H), 3.35 – 3.23 (m, 1H), 2.87 – 2.78 (m, 2H);  $^{13}C$  NMR (126 MHz,  $CDCl_3$ )  $\delta$  158.5, 148.1, 145.0, 144.2, 129.5, 129.1, 127.9, 127.6, 124.3, 114.2, 95.3, 58.0, 55.2, 54.7, 34.1.



**8b: N-((1-(2,2-dimethoxyethyl)-1H-tetrazol-5-yl)(4-nitrophenyl)methyl)propan-1-amine.**

The product was obtained using procedure **A**, 483 mg, 69 % as pale yellow liquid; HRMS (ESI)  $m/z$  calcd for  $C_{15}H_{23}N_6O_4$   $[M+H]^+$  : 351.1775; found: 351.1775;  $^1H$  NMR (500 MHz,  $CDCl_3$ )  $\delta$  8.23 (d,  $J = 8.7$  Hz, 2H), 7.61 (d,  $J = 8.7$  Hz, 2H), 5.38 (s, 1H), 4.66 (t,  $J = 5.4$  Hz, 1H), 4.50 (dd, 1H), 4.39 (dd,  $J = 14.1, 5.1$  Hz, 1H), 3.41 (s, 3H), 3.32 (s, 3H), 2.52 (t,  $J = 7.1$  Hz, 2H), 1.57 – 1.49 (m, 2H), 0.92 (t,  $J = 7.4$  Hz, 3H);  $^{13}C$  NMR (126 MHz,  $CDCl_3$ )  $\delta$  155.9, 147.8, 145.3, 128.7, 124.2, 123.9, 103.0, 102.6, 56.6, 49.7, 23.0, 11.6.

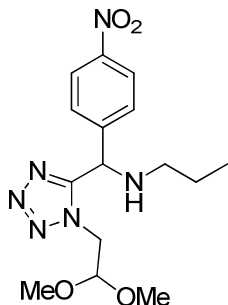

**2b: 8-(4-nitrophenyl)-7-propyl-7,8-dihydro-tetrazolo[1,5-a]pyrazine.**

The product was obtained using procedure **B**, 125 mg, 44 % as brown liquid; HRMS (ESI)  $m/z$  calcd for  $C_{13}H_{15}N_6O_2$   $[M+H]^+$  : 287.1251; found: 287.1251;  $^1H$  NMR (500 MHz,  $CDCl_3$ )  $\delta$  8.24 (d,  $J = 8.6$  Hz, 2H), 7.61 (d,  $J = 8.6$  Hz, 2H), 6.64 (d,  $J = 5.7$  Hz, 1H), 6.35 (d,  $J = 5.7$  Hz, 1H), 6.25 (s, 1H), 3.18 – 3.05 (m, 2H), 1.72 – 1.56 (m, 2H), 0.91 (t,  $J = 7.4$  Hz, 3H);  $^{13}C$  NMR (126 MHz,  $CDCl_3$ )  $\delta$  148.3, 145.1, 144.2, 128.2, 127.7, 124.4, 95.0, 57.8, 54.8, 21.3, 10.9.

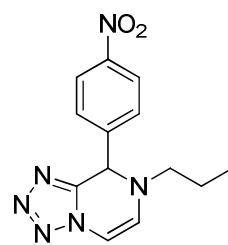

**8c: N-((1-(2,2-dimethoxyethyl)-1H-tetrazol-5-yl)(4-methoxyphenyl)methyl)propan-1-amine.**

The product was obtained using procedure **A**, 469 mg, 70 % as yellow liquid; HRMS (ESI)  $m/z$  calcd for  $C_{16}H_{26}N_6O_3$   $[M+H]^+$  : 336.2030; found: 336.2029;  $^1H$  NMR (500 MHz,  $CDCl_3$ )  $\delta$  7.26 (d,  $J = 8.5$  Hz, 2H), 6.88 (d,  $J = 8.5$  Hz, 2H), 5.23 (s, 1H), 4.58 (t,  $J = 5.5$  Hz, 1H), 4.41 (dd,  $J = 14.2, 5.5$  Hz, 1H), 4.23 (dd,  $J = 14.2, 6.0$  Hz, 1H), 3.79 (s, 3H), 3.36 (s,

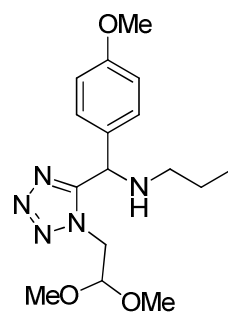

3H), 3.33 (s, 3H), 2.53 (t,  $J = 7.4$  Hz, 2H), 1.58 – 1.49 (m, 2H), 0.91 (t,  $J = 7.4$  Hz, 3H);  $^{13}\text{C}$  NMR (126 MHz,  $\text{CDCl}_3$ )  $\delta$  159.5, 156.9, 130.2, 128.7, 114.3, 102.6, 56.7, 55.5, 55.3, 49.6, 48.9, 23.0, 11.7.

**2c: 8-(4-methoxyphenyl)-7-propyl-7,8-dihydro-tetrazolo[1,5-a]pyrazine.**

The product was obtained using procedure **B**, 57 mg, 21 % as brown liquid;

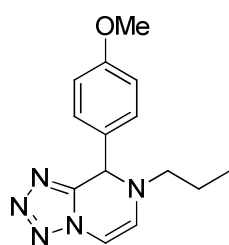

HRMS (ESI)  $m/z$  calcd for  $\text{C}_{14}\text{H}_{17}\text{N}_5\text{O}$   $[\text{M}+\text{H}]^+$  : 272.1512; found: 272.1524;  $^1\text{H}$  NMR (500 MHz,  $\text{CDCl}_3$ )  $\delta$  7.27 (d,  $J = 8.5$  Hz, 2H), 6.87 (d,  $J = 8.5$  Hz, 2H), 6.55 (d,  $J = 5.7$  Hz, 1H), 6.26 (d,  $J = 5.7$  Hz, 1H), 6.02 (s, 1H), 3.78 (s, 3H), 3.12 – 3.06 (m, 1H), 3.04 – 2.98 (m, 1H), 1.66 – 1.50 (m, 2H), 0.88 (t,  $J = 7.4$  Hz, 3H);  $^{13}\text{C}$  NMR (126 MHz,  $\text{CDCl}_3$ )  $\delta$  160.1, 146.3, 130.0, 128.6, 127.9, 114.4, 93.9, 57.7, 55.2, 54.1, 21.1, 10.9.

**8d: N-(1-(1-(2,2-dimethoxyethyl)-1H-tetrazol-5-yl)cyclohexyl)aniline.**

The product was obtained using procedure **A**, 509mg, 77 % as white solid, m.p.:

100-102 °C; HRMS (ESI)  $m/z$  calcd for  $\text{C}_{17}\text{H}_{26}\text{N}_5\text{O}_2$   $[\text{M}+\text{H}]^+$  : 332.2081; found: 332.2081;  $^1\text{H}$  NMR (500 MHz,  $\text{CDCl}_3$ )  $\delta$  7.06 (t,  $J = 7.8$  Hz, 2H), 6.73 (t,  $J = 7.4$  Hz, 1H), 6.22 (d,  $J = 8.4$  Hz, 2H), 4.76 (t,  $J = 5.6$  Hz, 1H), 4.64 (d,  $J = 5.6$  Hz, 2H), 4.10 (s, 1H), 3.30 (s, 6H), 2.37 – 2.30 (m, 2H), 2.23 – 2.14 (m, 2H), 1.74 – 1.67 (m, 3H), 1.58 – 1.36 (m, 3H);  $^{13}\text{C}$  NMR (126 MHz,  $\text{CDCl}_3$ )  $\delta$  159.7, 143.8, 129.4, 119.2, 115.1, 103.0, 55.5, 54.2, 50.0, 34.2, 24.8, 21.0.

**2d: 7'-phenyl-7'H-spiro[cyclohexane-1,8'-tetrazolo[1,5-a]pyrazine].**

The product was obtained using procedure **B**, 195 mg, 73 % as white solid, m.p.:

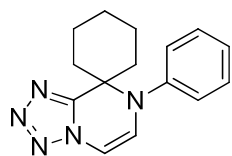

99-101 °C; HRMS (ESI)  $m/z$  calcd for  $\text{C}_{15}\text{H}_{18}\text{N}_5$   $[\text{M}+\text{H}]^+$  : 268.1557; found: 268.1556;  $^1\text{H}$  NMR (500 MHz,  $\text{CDCl}_3$ )  $\delta$  7.44 – 7.35 (m, 3H), 7.24 – 7.20 (m, 2H), 6.76 (d,  $J = 5.6$  Hz, 1H), 6.27 (d,  $J = 5.6$  Hz, 1H), 2.34 (d,  $J = 12.4$  Hz, 2H), 2.02 – 1.91 (m,

2H), 1.73 – 1.54 (m, 5H), 1.10 – 0.98 (m, 1H);  $^{13}\text{C}$  NMR (126 MHz,  $\text{CDCl}_3$ )  $\delta$  148.9, 142.1, 130.3, 129.2, 128.9, 127.9, 97.2, 61.0, 33.1, 24.9, 22.3.

**8e: N-(1-(1-(2,2-dimethoxyethyl)-1H-tetrazol-5-yl)cyclohexyl)-2,4-dimethyl aniline.**

The product was obtained using procedure A, 604mg, 84 % as white solid; m.p.:

106-108 °C; HRMS (ESI) m/z calcd for  $\text{C}_{19}\text{H}_{30}\text{N}_5\text{O}_2$   $[\text{M}+\text{H}]^+$  : 360.2394; found: 360.2394;  $^1\text{H}$  NMR (500 MHz,  $\text{CDCl}_3$ )  $\delta$  6.91 (s, 1H), 6.64 (d,  $J = 8.2$  Hz, 1H), 5.64 (d,  $J = 8.2$  Hz, 1H), 4.75 – 4.70 (m, 1H), 4.62 (d,  $J = 5.6$  Hz, 2H), 3.96 (s, 1H), 3.30 (s, 6H), 2.41 (d,  $J = 13.7$  Hz, 2H), 2.24 (s, 3H), 2.21 – 2.10 (m, 5H), 1.78 – 1.65 (m, 3H), 1.53 – 1.36 (m, 3H);  $^{13}\text{C}$  NMR (126 MHz,  $\text{CDCl}_3$ )  $\delta$  160.0, 139.2, 131.6, 127.9, 127.4, 123.0, 112.8, 103.0, 55.5, 54.2, 49.9, 34.1, 24.9, 21.1, 20.2, 17.6.

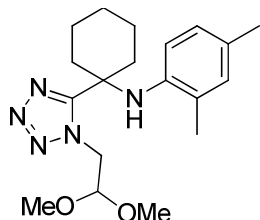

**2e: 7'-(2,4-dimethylphenyl)-7'H-spiro[cyclohexane-1,8'-tetrazolo[1,5-a]pyrazine].**

The product was obtained using procedure B, 207 mg, 70 % as white solid, m.p.:

148-150 °C; HRMS (ESI) m/z calcd for  $\text{C}_{17}\text{H}_{22}\text{N}_5$   $[\text{M}+\text{H}]^+$  : 296.1868; found: 296.1869;  $^1\text{H}$  NMR (500 MHz,  $\text{CDCl}_3$ )  $\delta$  7.16 (d,  $J = 8.0$  Hz, 1H), 7.07 (s, 1H), 7.04 (d,  $J = 8.0$  Hz, 1H), 6.80 (d,  $J = 5.4$  Hz, 1H), 6.08 (d,  $J = 5.4$  Hz, 1H), 2.53 – 2.39 (m, 2H), 2.34 (s, 3H), 2.22 – 2.16 (m, 1H), 2.04 (s, 3H), 1.76 – 1.32 (m, 6H), 1.15 – 1.05 (m, 1H);  $^{13}\text{C}$  NMR (126 MHz,  $\text{CDCl}_3$ )  $\delta$  148.7, 138.4, 138.3, 138.2, 132.0, 130.6, 128.3, 127.4, 97.4, 61.0, 33.4, 32.4, 25.0, 22.5, 21.9, 20.9, 18.1.

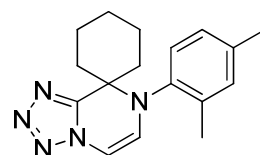

**8f: N-(1-(1-(2,2-dimethoxyethyl)-1H-tetrazol-5-yl)cyclohexyl)-2,6-dimethylaniline.**

The product was obtained using procedure **A**, 158 mg, 22 % as white solid, m.p.: 122-124 °C; HRMS (ESI) m/z calcd for C<sub>19</sub>H<sub>30</sub>N<sub>5</sub>O<sub>2</sub>

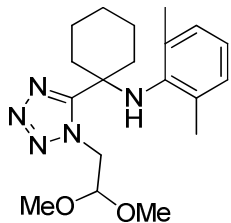

[M+H]<sup>+</sup> : 360.2394; found: 360.2393; <sup>1</sup>H NMR (500 MHz, CDCl<sub>3</sub>) δ 6.94 (d, *J* = 7.4 Hz, 2H), 6.85 – 6.82 (m, 1H), 5.05 (t, *J* = 5.7 Hz, 1H), 4.78 (d, *J* = 5.7 Hz, 2H), 3.43 (s, 6H), 2.42 – 2.34 (m, 2H), 1.89 (s, 6H), 1.82 – 1.73 (m, 2H), 1.64 – 1.53 (m, 5H), 1.44 – 1.36 (m, 1H); <sup>13</sup>C NMR (126 MHz, CDCl<sub>3</sub>) δ 160.0, 141.9, 131.1, 129.2, 123.0, 103.3, 56.5, 55.9, 51.0, 37.1, 23.0, 22.0, 19.5.

**2f: 7'-(2,6-dimethylphenyl)-7'H-spiro[cyclohexane-1,8'-tetrazolo[1,5-a]pyrazine].**

The product was obtained using procedure **B**, 177mg, 60 % as white solid, m.p.: 127-129 °C; HRMS (ESI) m/z calcd for C<sub>17</sub>H<sub>22</sub>N<sub>5</sub> [M+H]<sup>+</sup> :

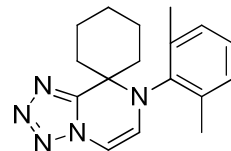

296.1870; found: 296.1869; <sup>1</sup>H NMR (500 MHz, CDCl<sub>3</sub>) δ 7.16 – 7.12 (m, 1H), 7.07 (d, *J* = 7.5 Hz, 2H), 7.03 (d, *J* = 5.2 Hz, 1H), 6.04 (d, *J* = 5.2 Hz, 1H), 2.28 – 2.22 (m, 2H), 2.06 (s, 6H), 1.90 – 1.80 (m, 2H), 1.78 – 1.71 (m, 1H), 1.67 – 1.60 (m, 2H), 1.55 – 1.47 (m, 2H), 1.22 – 1.11 (m, 1H); <sup>13</sup>C NMR (126 MHz, CDCl<sub>3</sub>) δ 148.4, 139.6, 138.9, 128.6, 128.1, 126.2, 100.8, 59.7, 32.6, 25.1, 22.1, 18.8.

**8g: N-(1-(1-(2,2-dimethoxyethyl)-1H-tetrazol-5-yl)cyclohexyl)pyridin-2-amine.**

The product was obtained using procedure **A**, 358 mg, 54 % as white solid, m.p.: 126-128 °C; HRMS (ESI) m/z calcd for C<sub>16</sub>H<sub>25</sub>N<sub>6</sub>O<sub>2</sub>

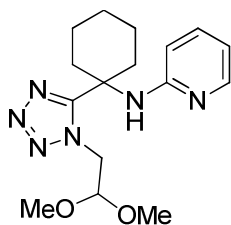

[M+H]<sup>+</sup> : 333.2033; found: 333.2032; <sup>1</sup>H NMR (500 MHz, CDCl<sub>3</sub>) δ 7.98 (dd, *J* = 8.0, 0.8 Hz, 1H), 7.35 – 7.31 (m, 1H), 6.62 (dd, *J* = 7.2, 5.0 Hz, 1H), 6.06 (d, *J* = 8.0 Hz, 1H), 4.94 (s, 1H), 4.77 (t, *J* = 5.6 Hz, 1H), 4.52 (d, *J* = 5.6 Hz, 2H), 3.31 (s, 6H),

2.44 – 2.37 (m, 2H), 2.25 – 2.17 (m, 2H), 1.78 – 1.68 (m, 3H), 1.63 – 1.54 (m, 2H), 1.49 – 1.39 (m, 1H); <sup>13</sup>C NMR (126 MHz, CDCl<sub>3</sub>) δ 159.6, 155.9, 148.4, 137.5, 114.6, 108.2, 103.0, 55.5, 53.6, 49.9, 34.4, 24.9, 21.0.

**2g: 7'-(pyridin-2-yl)-7'H-spiro[cyclohexane-1,8'-tetrazolo[1,5-a]pyrazine].**

The product was obtained using procedure **B**, 80mg, 30 % as white solid, m.p.:

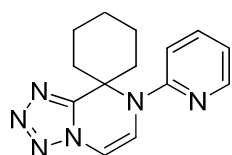

132-134 °C; HRMS (ESI) m/z calcd for C<sub>14</sub>H<sub>17</sub>N<sub>6</sub> [M+H]<sup>+</sup> : 269.1509; found: 269.1509; <sup>1</sup>H NMR (500 MHz, CDCl<sub>3</sub>) δ 8.47 (dd, *J* = 5.0, 1.7 Hz, 1H), 7.74 (td, *J* = 7.5, 1.9 Hz, 1H),

7.19 (dd, *J* = 7.5, 5.0 Hz, 1H), 7.03 (d, *J* = 7.5 Hz, 1H), 6.87 (d, *J* = 5.7 Hz, 1H), 6.41 (d, *J* = 5.7 Hz, 1H), 2.53 – 2.45 (m, 2H), 2.27 – 2.23 (m, 2H), 2.06 – 1.96 (m, 2H), 1.79 – 1.66 (m, 3H), 1.34 – 1.24 (m, 1H); <sup>13</sup>C NMR (126 MHz, CDCl<sub>3</sub>) δ 155.8, 150.0, 148.2, 138.2, 126.7, 121.1, 120.5, 99.5, 62.0, 32.0, 24.7, 22.4.

**8h: 1-(1-(2,2-dimethoxyethyl)-1H-tetrazol-5-yl)-N-phenethylpropan-1-amine.**

The product was obtained using procedure **A**, 402 mg, 63 % as liquid; HRMS

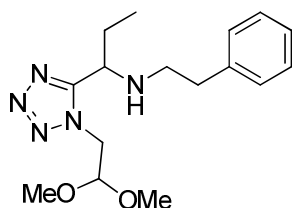

(ESI) m/z calcd for C<sub>16</sub>H<sub>25</sub>N<sub>5</sub>O<sub>2</sub> [M+H]<sup>+</sup> : 320.2081; found: 320.2081; <sup>1</sup>H NMR (500 MHz, CDCl<sub>3</sub>) δ 7.29 (t, *J* = 7.5 Hz, 2H), 7.21 (t, *J* = 7.5 Hz, 1H), 7.14 (d, *J* = 7.5 Hz, 2H), 4.76 (t, *J* = 5.4 Hz, 1H), 4.48 (dd, *J* = 14.1, 5.4

Hz, 1H), 4.40 (dd, *J* = 14.1, 5.4 Hz, 1H), 4.10 (t, *J* = 7.0 Hz, 1H), 3.39 (s, 3H), 3.36 (s, 3H), 2.80 – 2.63 (m, 4H), 1.95 – 1.84 (m, *J* = 13.8, 7.0 Hz, 2H), 0.89 (t, *J* = 7.4, 3H); <sup>13</sup>C NMR (126 MHz, CDCl<sub>3</sub>) δ 157.0, 139.5, 128.6, 128.4, 126.2, 102.7, 55.0, 54.3, 49.0, 48.3, 36.3, 27.2, 27.2, 10.3.

**2h: 8-ethyl-7-phenethyl-7,8-dihydro-tetrazolo[1,5-a]pyrazine.**

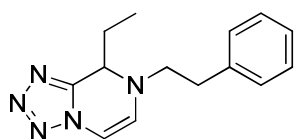

The product was obtained using procedure **B**, 117 mg, 46 % as brown solid, m.p.: 89-91 °C; HRMS (ESI) m/z calcd for C<sub>14</sub>H<sub>17</sub>N<sub>5</sub> [M+H]<sup>+</sup> : 256.1562; found:

256.1563;  $^1\text{H}$  NMR (500 MHz,  $\text{CDCl}_3$ )  $\delta$  7.29 – 7.20 (m, 3H), 7.11 – 7.08 (m, 2H), 6.44 (d,  $J = 5.6$  Hz, 1H), 6.00 (d,  $J = 5.6$  Hz, 1H), 4.91 (t,  $J = 5.6$  Hz, 1H), 3.51 – 3.40 (m, 2H), 2.92 – 2.82 (m, 2H), 1.90 – 1.82 (m, 2H), 0.88 (t,  $J = 7.4$  Hz, 3H);  $^{13}\text{C}$  NMR (126 MHz,  $\text{CDCl}_3$ )  $\delta$  145.4, 137.7, 128.7, 128.6, 128.1, 126.8, 94.9, 55.9, 54.39, 35.6, 25.8, 8.6.

**8i: N-(1-(1-(2,2-dimethoxyethyl)-1H-tetrazol-5-yl)propyl)butan-1-amine.**

The product was obtained using procedure **A**, 222 mg, 41 % as white solid,

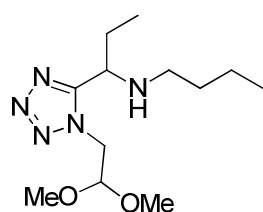

m.p.: 86-88 °C; HRMS (ESI)  $m/z$  calcd for  $\text{C}_{12}\text{H}_{26}\text{N}_5\text{O}_2$

$[\text{M}+\text{H}]^+$  : 272.2081; found: 272.2079;  $^1\text{H}$  NMR (500 MHz,

$\text{CDCl}_3$ )  $\delta$  4.80 (t,  $J = 5.5$  Hz, 1H), 4.60 – 4.50 (m, 2H), 4.06

(t,  $J = 7.0$  Hz, 1H), 3.42 (s, 3H), 3.40 (s, 3H), 2.48 – 2.41

(m, 1H), 2.40 – 2.33 (m, 1H), 1.94 – 1.87 (m, 2H), 1.45 – 1.35 (m, 2H), 1.35 –

1.23 (m, 2H), 0.92 (t,  $J = 7.4$  Hz, 3H), 0.87 (t,  $J = 7.4$  Hz, 3H);  $^{13}\text{C}$  NMR (126

MHz,  $\text{CDCl}_3$ )  $\delta$  157.4, 102.8, 55.6, 55.4, 54.7, 49.0, 47.0, 32.2, 27.4, 20.3, 13.8,

10.3.

**2i: 7-butyl-8-ethyl-7,8-dihydro-tetrazolo[1,5-a]pyrazine.**

The product was obtained using procedure **B**, 113 mg, 55 % as yellow liquid;

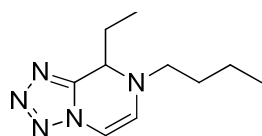

HRMS (ESI)  $m/z$  calcd for  $\text{C}_{10}\text{H}_{18}\text{N}_5$   $[\text{M}+\text{H}]^+$  : 208.1562;

found: 208.1563;  $^1\text{H}$  NMR (500 MHz,  $\text{CDCl}_3$ )  $\delta$  6.48 (d,  $J$

= 5.6 Hz, 1H), 6.10 (d,  $J = 5.6$  Hz, 1H), 5.04 (t,  $J = 5.4$  Hz,

1H), 3.27 – 3.12 (m, 2H), 1.94 – 1.87 (m, 2H), 1.64 – 1.54 (m, 2H), 1.41 – 1.29

(m, 2H), 0.96 (t,  $J = 7.3$  Hz, 3H), 0.91 (t,  $J = 7.3$  Hz, 3H);  $^{13}\text{C}$  NMR (126 MHz,

$\text{CDCl}_3$ )  $\delta$  145.5, 128.5, 94.4, 55.6, 52.3, 30.8, 25.4, 19.7, 13.7, 8.6.

**11a: N-((1-(2,2-dimethoxyethyl)-1H-tetrazol-5-yl)(3,4,5-trimethoxyphenyl)methyl)propan-2-amine.**

The product was obtained using procedure **A**, 726 mg, 92 % as white solid,

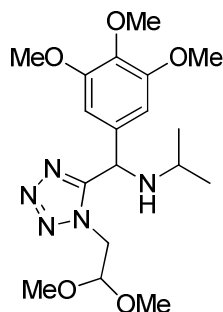

m.p.: 93-95 °C; HRMS (ESI)  $m/z$  calcd for  $C_{18}H_{30}N_5O_5$   $[M+H]^+$  : 396.2242; found: 396.2242;  $^1H$  NMR (500 MHz,  $CDCl_3$ )  $\delta$  6.54 (s, 2H), 5.30 (s, 1H), 4.57 (t,  $J = 5.0$  Hz, 1H), 4.42 (dd,  $J = 14.2, 5.0$  Hz, 1H), 4.23 (dd,  $J = 14.2, 5.0$  Hz, 1H), 3.83 (s, 6H), 3.81 (s, 3H), 3.38 (s, 3H), 3.37 (s, 3H), 2.83 – 2.72 (m, 1H), 2.17 (s, 1H), 1.12 (t,  $J = 6.0$ , 6H);  $^{13}C$

NMR (126 MHz,  $CDCl_3$ )  $\delta$  156.9, 153.6, 137.8, 133.8, 104.3, 102.8, 60.7, 56.1, 55.8, 55.4, 54.6, 49.0, 46.1, 22.6, 22.5.

**3a: N-isopropyl-7,8,9-trimethoxy-11H-benzo[d]tetrazolo[1,5-a]azepin-11-amine**

The product was obtained using procedure **B**, 188 mg, 57 % as white solid, m.p.:

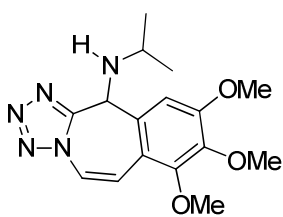

93-95 °C; HRMS (ESI)  $m/z$  calcd for  $C_{16}H_{22}N_5O_3$   $[M+H]^+$  : 332.1717; found: 332.1716;  $^1H$  NMR (500 MHz,  $CDCl_3$ )  $\delta$  7.54 (d,  $J = 9.5$  Hz, 1H), 7.20 (d,  $J = 9.5$  Hz, 1H), 6.90 (s, 1H), 5.33 (s, 1H), 3.94 (s, 3H), 3.92 (s, 3H), 3.86 (s, 3H),

2.53 (dt,  $J = 11.9, 6.0$  Hz, 1H), 1.65 (s, 1H), 1.10 (d,  $J = 6.0$  Hz, 3H), 0.96 (d,  $J = 6.0$  Hz, 3H);  $^{13}C$  NMR (126 MHz,  $CDCl_3$ )  $\delta$  155.7, 153.9, 152.3, 141.8, 133.2, 118.0, 117.1, 107.9, 103.6, 61.5, 60.9, 56.1, 54.2, 46.3, 23.1, 22.2.

**11b: N-((1-(2,2-dimethoxyethyl)-1H-tetrazol-5-yl)(3,4,5-trimethoxyphenyl)methyl)-N-propylpropan-1-amine.**

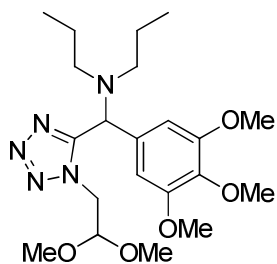

The product was obtained using procedure **A**, 725 mg, 83 % as white solid, m.p.: 63-65 °C; HRMS (ESI)  $m/z$  calcd for  $C_{21}H_{36}N_5O_5$   $[M+H]^+$  : 438.2711; found: 438.2710;  $^1H$  NMR (500 MHz,  $CDCl_3$ )  $\delta$  6.55 (s, 2H), 5.40 (s, 1H), 4.64 (t,  $J = 5.5$  Hz, 1H), 4.50 (dd,  $J = 14.2, 5.5$  Hz, 1H),

4.36 (dd,  $J = 14.2, 5.5$  Hz, 1H), 3.84 (s, 3H), 3.82 (s, 6H), 3.40 (s, 3H), 3.31 (s, 3H), 2.54 – 2.49 (m, 4H), 1.50-1.38 (m, 4H), 0.81 (t,  $J = 7.3$  Hz, 6H);  $^{13}\text{C}$  NMR (126 MHz,  $\text{CDCl}_3$ )  $\delta$  155.4, 153.0, 137.8, 131.7, 106.5, 102.8, 60.8, 59.5, 56.2, 55.8, 55.5, 52.6, 49.2, 21.0, 11.7.

**3b: 7,8,9-trimethoxy-N,N-dipropyl-11H-benzo[d]tetrazolo[1,5-a]azepin-11-amine.**

The product was obtained using procedure **B**, 283 mg, 76 % as oil; HRMS (ESI)

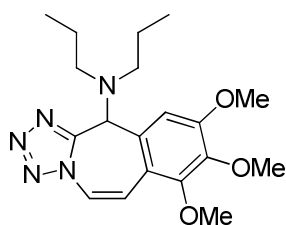

$m/z$  calcd for  $\text{C}_{19}\text{H}_{28}\text{N}_5\text{O}_3$   $[\text{M}+\text{H}]^+$  : 374.2187; found: 374.2185;  $^1\text{H}$  NMR (500 MHz,  $\text{CDCl}_3$ )  $\delta$  7.51 (d,  $J = 9.4$  Hz, 1H), 7.17 (d,  $J = 9.4$  Hz, 1H), 6.79 (s, 1H), 5.34 (s, 1H), 3.93 (s, 3H), 3.92 (s, 3H), 3.90 (s, 3H), 2.21 – 2.11 (m, 4H), 1.32 – 1.05 (m, 4H), 0.63 (t,  $J = 7.4$  Hz, 6H);

$^{13}\text{C}$  NMR (126 MHz,  $\text{CDCl}_3$ )  $\delta$  154.8, 153.5, 152.0, 142.0, 132.2, 119.1, 117.8, 117.2, 109.8, 61.9, 61.3, 60.8, 56.0, 51.8, 18.8, 11.3.

**11c: N-(4-chlorobenzyl)-1-(1-(2,2-dimethoxyethyl)-1H-tetrazol-5-yl)-1-(3,4,5-trimethoxyphenyl)methanamine.**

The product was obtained using procedure **A**, 300 mg, 63 % as oil; HRMS (ESI)

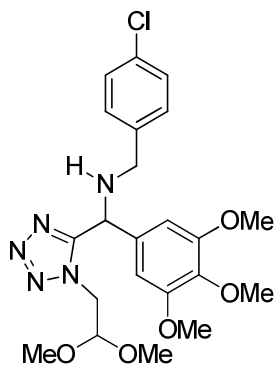

$m/z$  calcd for  $\text{C}_{22}\text{H}_{29}\text{ClN}_5\text{O}_5$   $[\text{M}+\text{H}]^+$  : 478.1852, found: 478.1852;  $^1\text{H}$  NMR (500 MHz,  $\text{CDCl}_3$ )  $\delta$  7.33 – 7.26 (m, 4H), 6.53 (s, 2H), 5.17 (s, 1H), 4.51 (t,  $J = 5.4$  Hz, 1H), 4.33 (dd,  $J = 14.2, 4.9$  Hz, 1H), 4.18 (dd,  $J = 14.2, 5.9$  Hz, 1H), 3.83 (s, 3H), 3.82 (s, 6H), 3.76 (s, 2H), 3.30 (s, 6H), 2.55 (s, 1H);  $^{13}\text{C}$  NMR (126 MHz,  $\text{CDCl}_3$ )  $\delta$  156.3, 153.7, 137.5, 133.1, 129.6, 128.6, 104.7, 102.6, 60.8, 56.2, 56.2,

55.5, 55.4, 50.5, 49.0.



**3c: N-(4-chlorobenzyl)-7,8,9-trimethoxy-11H-benzo[d]tetrazolo[1,5-a]azepin-11-amine.**

The product was obtained using procedure **B**, 223 mg, 54 % as white solid, m.p.:

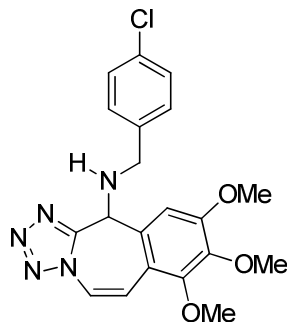

156-158 °C; HRMS (ESI)  $m/z$  calcd for  $C_{20}H_{20}ClN_5O_3$   $[M+H]^+$  : 414.1327; found: 414.1329;  $^1H$  NMR (500 MHz,  $CDCl_3$ )  $\delta$  7.52 (d,  $J = 9.5$  Hz, 1H), 7.28 – 7.25 (m, 2H), 7.21 – 7.16 (m, 3H), 6.79 (s, 1H), 5.23 (s, 1H), 3.92 (s, 3H), 3.90 (s, 3H), 3.88 (d,  $J = 4.5$  Hz, 3H), 3.63 (s, 2H);  $^{13}C$  NMR (126 MHz,  $CDCl_3$ )  $\delta$  155.6, 153.4, 152.4, 142.0, 137.2, 133.1, 132.4, 129.4, 128.6, 118.0, 117.1, 108.0, 61.5, 60.9, 56.1, 55.8, 50.4.

**11d: N-((1-(2,2-dimethoxyethyl)-1H-tetrazol-5-yl)(3,4,5-trimethoxyphenyl)methyl) prop-2-en-1-amine.**

The product was obtained using procedure **A**, 747 mg, 95 % as oil; HRMS (ESI)

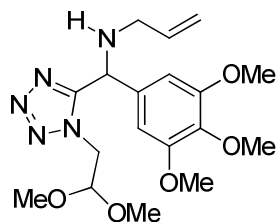

$m/z$  calcd for  $C_{18}H_{28}N_5O_5$   $[M+H]^+$  : 394.2085; found: 394.2083;  $^1H$  NMR (500 MHz,  $CDCl_3$ )  $\delta$  6.58 (s, 2H), 5.91 (dd,  $J = 17.0, 10.4$  Hz, 1H), 5.24 (s, 1H), 5.23 - 5.14 (m, 2H), 4.55 (t,  $J = 5.4$  Hz, 1H), 4.41 (dd,  $J = 14.2, 5.4$  Hz, 1H), 4.27 (dd,  $J = 14.2, 6.0$  Hz, 1H), 3.83 (s, 6H), 3.82 (s, 3H), 3.36 (s, 3H), 3.34 (s, 3H), 3.25 (dd,  $J = 6.0, 1.1$  Hz, 2H);  $^{13}C$  NMR (126 MHz,  $CDCl_3$ )  $\delta$  156.4, 153.6, 138.0, 135.6, 133.3, 1176.0, 104.6, 102.6, 60.7, 56.3, 56.1, 55.5, 55.3, 49.9, 49.0.

**3d: N-allyl-7,8,9-trimethoxy-11H-benzo[d]tetrazolo[1,5-a]azepin-11-amine.**

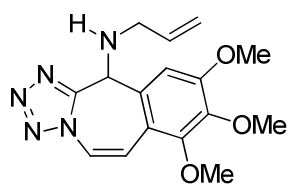

The product was obtained using procedure **B**, 204 mg, 62 % as oil; HRMS (ESI)  $m/z$  calcd for  $C_{16}H_{20}N_5O_3$   $[M+H]^+$  : 330.1561; found: 330.1560;  $^1H$  NMR (500 MHz,  $CDCl_3$ )  $\delta$  7.55 (d,  $J = 9.5$  Hz, 1H), 7.20 (d,  $J = 9.5$  Hz, 1H), 6.92 (s, 1H), 5.83 – 5.72 (m, 1H), 5.29 (s, 1H), 5.14 (ddd,  $J = 14.0, 11.2, 1.2$  Hz, 2H),

3.95 (s, 3H), 3.93 (s, 3H), 3.88 (s, 3H), 3.23 – 3.05 (m, 2H), 1.71 (s, 1H); <sup>13</sup>C NMR (126 MHz, CDCl<sub>3</sub>) δ 155.5, 153.5, 152.2, 141.8, 135.1, 132.5, 117.9, 117.8, 117.1, 117.0, 107.9, 61.4, 60.8, 56.0, 55.6, 49.6.

**11e: N-((1-(2,2-dimethoxyethyl)-1H-tetrazol-5-yl)(3,5-dimethoxyphenyl)methyl) prop-2-en-1-amine.**

The product was obtained using procedure A, 508 mg, 70 % as oil; HRMS (ESI)

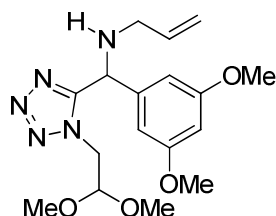

m/z calcd for C<sub>17</sub>H<sub>26</sub>N<sub>5</sub>O<sub>4</sub> [M+H]<sup>+</sup> : 364.1979 found: 364.19779; <sup>1</sup>H NMR (500 MHz, CDCl<sub>3</sub>) δ 6.49 (d, *J* = 2.2 Hz, 2H), 6.39 (t, *J* = 2.2 Hz, 1H), 5.90 (dd, *J* = 17.1, 10.2 Hz, 1H), 5.25 (s, 1H), 5.20 (dd, *J* = 17.2, 1.6 Hz, 1H), 5.15 (dd, *J* = 10.2, 1.4 Hz, 1H), 4.56 (t, *J* = 5.5 Hz, 1H), 4.40

(dd, *J* = 14.2, 5.0 Hz, 1H), 4.25 (dd, *J* = 14.2, 5.9 Hz, 1H), 3.76 (s, 6H), 3.36 (s, 3H), 3.34 (s, 3H), 3.25 (d, *J* = 6.0 Hz, 2H), 2.25 (brs, 1H); <sup>13</sup>C NMR (126 MHz, CDCl<sub>3</sub>) δ 161.2, 156.3, 140.0, 135.7, 116.9, 105.5, 102.4, 100.2, 56.2, 55.4, 55.3, 55.1, 49.9, 49.0.

**3e: N-allyl-7,9-dimethoxy-11H-benzo[d]tetrazolo[1,5-a]azepin-11-amine.**

The product was obtained using procedure B, 248 mg, 83 % as white solid, m.p.:

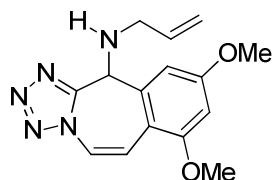

114-116 °C; HRMS (ESI) m/z calcd for C<sub>15</sub>H<sub>18</sub>N<sub>5</sub>O<sub>2</sub> [M+H]<sup>+</sup> : 300.1455; found: 300.1455; <sup>1</sup>H NMR (500 MHz, CDCl<sub>3</sub>) δ 7.48 (d, *J* = 9.5 Hz, 1H), 7.23 (d, *J* = 9.5 Hz, 1H), 6.68 (d, *J* = 2.2 Hz, 1H), 6.49 (d, *J* = 2.2 Hz, 1H), 5.82 –

5.73 (m, 1H), 5.26 (s, 1H), 5.14 (ddd, *J* = 13.7, 11.4, 1.3 Hz, 2H), 3.88 (s, 3H), 3.87 (s, 3H), 3.19 – 3.06 (m, 2H), 1.74 (brs, 1H); <sup>13</sup>C NMR (126 MHz, CDCl<sub>3</sub>) δ 162.8, 159.0, 153.5, 139.2, 135.2, 117.2, 117.1, 117.0, 113.0, 105.3, 98.3, 56.0, 55.9, 55.6, 49.8.

**11f: 2-(3-chlorophenyl)-N-((1-(2,2-dimethoxyethyl)-1H-tetrazol-5-yl)(3,5-dimethoxyphenyl)methyl)ethanamine.**

The product was obtained using procedure A, 857 mg, 93 % as oil; HRMS (ESI)

$m/z$  calcd for  $C_{22}H_{29}N_5O_4$   $[M+H]^+$  : 462.1903; found: 462.1902;  $^1H$  NMR (500 MHz,  $CDCl_3$ )  $\delta$  7.24 – 7.17 (m, 3H), 7.11 – 7.04 (m, 1H), 6.45 (d,  $J = 2.2$  Hz, 2H), 6.40 (t,  $J = 2.2$  Hz, 1H), 5.24 (s, 1H), 4.55 (t,  $J = 5.5$  Hz, 1H), 4.40 (dd,  $J = 14.2, 5.0$  Hz, 1H), 4.22 (dd,  $J = 14.2, 5.9$  Hz, 1H), 3.75 (s, 6H), 3.34 (s, 6H), 2.90 – 2.79 (m, 4H), 2.15 (s, 1H);  $^{13}C$  NMR (126 MHz,  $CDCl_3$ )  $\delta$  161.2, 156.3, 141.6, 140.0, 134.1, 129.7, 128.7, 126.9, 126.4, 105.4, 102.5, 100.3, 57.3, 55.5, 55.3, 49.0, 48.5, 35.9.

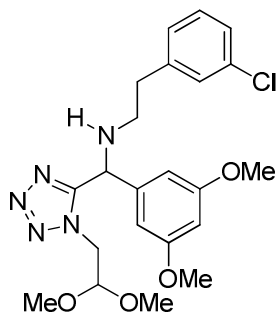

**3f: N-(3-chlorophenethyl)-7,9-dimethoxy-11H-benzo[d]tetrazolo[1,5-a]azepin-11-amine.**

The product was obtained using procedure B, 333 mg, 84 % as oil; HRMS (ESI)

$m/z$  calcd for  $C_{20}H_{21}ClN_5O_2$   $[M+H]^+$  : 398.1378; found: 398.1376;  $^1H$  NMR (500 MHz,  $CDCl_3$ )  $\delta$  7.31 (d,  $J = 9.5$  Hz, 1H), 7.17 (d,  $J = 5.0$  Hz, 2H), 7.10 (d,  $J = 9.5$  Hz, 1H), 7.06 (s, 1H), 6.97 – 6.92 (m, 1H), 6.63 (d,  $J = 2.3$  Hz, 1H), 6.47 (d,  $J = 2.3$  Hz, 1H), 5.22 (s, 1H), 3.86 (s, 3H), 3.84 (s, 3H), 2.87 – 2.77 (m, 1H), 2.75 – 2.64 (m, 3H), 1.69 (s, 1H);  $^{13}C$  NMR (126 MHz,  $CDCl_3$ )  $\delta$  162.8, 159.0, 153.4, 141.3, 139.1, 134.1, 129.7, 128.7, 126.8, 126.5, 116.9, 116.8, 112.8, 105.2, 98.4, 56.8, 55.9, 55.5, 48.0, 35.4.

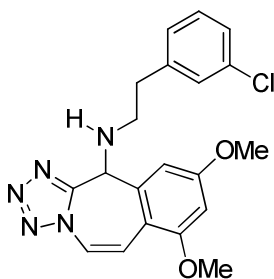

**11g: 4-benzyl-1-((1-(2,2-dimethoxyethyl)-1H-tetrazol-5-yl)(3,5-dimethoxyphenyl)methyl)piperidine.**

The product was obtained using procedure A, 839 mg, 87 % as oil; HRMS (ESI)

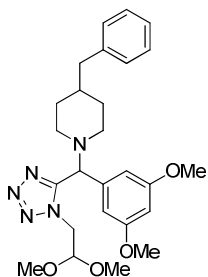

m/z calcd for  $C_{26}H_{36}N_5O_4$   $[M+H]^+$  : 482.2762; found: 482.2760;  $^1H$  NMR (500 MHz,  $CDCl_3$ )  $\delta$  7.26 (d,  $J = 7.8$  Hz, 2H), 7.17 (t,  $J = 7.2$  Hz, 1H), 7.10 (d,  $J = 7.8$  Hz, 2H), 6.55 (d,  $J = 2.2$  Hz, 2H), 6.38 (t,  $J = 2.2$  Hz, 1H), 4.96 (s, 1H), 4.65 (t,  $J = 5.5$  Hz, 1H), 4.56 (dd,  $J = 14.0, 5.5$  Hz, 1H), 4.37 (dd,  $J = 14.0, 5.5$  Hz, 1H), 3.75 (s, 6H), 3.37 (s, 3H), 3.33 (s, 3H), 2.94-2.84 (m, 1H), 2.72 (dd,  $J = 7.2, 3.8$  Hz, 1H), 2.52 (d,  $J = 7.2$  Hz, 2H), 2.19-2.11 (m, 1H), 1.96-1.88 (m, 1H), 1.65-1.56 (m, 1H), 1.56 – 1.45 (m, 1H), 1.42-1.25 (m, 2H);  $^{13}C$  NMR (126 MHz,  $CDCl_3$ )  $\delta$  160.8, 155.3, 140.4, 137.4, 129.0, 128.1, 125.8, 107.0, 102.6, 100.1, 64.9, 55.4, 55.4, 55.3, 51.9, 51.0, 49.2, 43.0, 37.7, 32.2, 32.1.

**3g: 11-(4-benzylpiperidin-1-yl)-7,9-dimethoxy-11H-benzo[d]tetrazolo[1,5-a]azepine.**

The product was obtained using procedure B, 400 mg, 96 % as white solid, m.p.

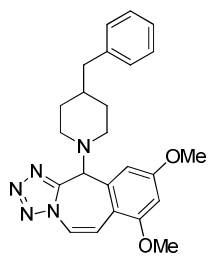

: 182-184 °C; HRMS (ESI) m/z calcd for  $C_{24}H_{27}N_5O_2$   $[M+H]^+$  : 418.2238; found: 418.2237;  $^1H$  NMR (500 MHz,  $CDCl_3$ )  $\delta$  7.41 (d,  $J = 9.4$  Hz, 1H), 7.22 (t,  $J = 7.4$  Hz, 2H), 7.17 (d,  $J = 9.4$  Hz, 1H), 7.14 (t,  $J = 7.4$  Hz, 1H), 7.05 (d,  $J = 7.1$  Hz, 2H), 6.49 (dd,  $J = 7.5, 2.3$  Hz, 2H), 4.89 (s, 1H), 3.86 (s, 3H), 3.82 (s, 3H), 2.47 – 2.33 (m, 3H), 2.23 – 2.17 (m, 1H), 1.92 (td,  $J = 11.6, 2.0$ , 1H), 1.75 (td,  $J = 11.6, 2.0$  Hz, 1H), 1.50 – 1.41 (m, 2H), 1.06 – 0.96 (m, 2H);  $^{13}C$  NMR (126 MHz,  $CDCl_3$ )  $\delta$  162.1, 158.9, 152.9, 140.4, 138.0, 128.9, 128.1, 125.7, 117.1, 117.0, 113.9, 107.4, 98.4, 65.2, 55.9, 55.5, 51.9, 51.0, 42.8, 37.8, 31.7, 31.6.

**11h: N-((1-(2,2-dimethoxyethyl)-1H-tetrazol-5-yl)(3,5-dimethoxyphenyl)methyl)aniline.**

The product was obtained using procedure A, 790 mg, 99 % as oil; HRMS (ESI)

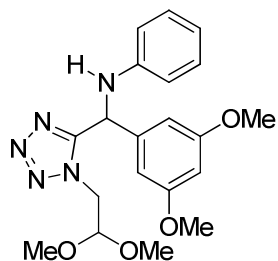

m/z calcd for  $C_{20}H_{26}N_5O_4$   $[M+H]^+$  : 400.1979; found: 400.1979;  $^1H$  NMR (500 MHz,  $CDCl_3$ )  $\delta$  7.15 (t,  $J = 8.0$  Hz, 2H), 6.75 (t,  $J = 7.4$  Hz, 1H), 6.66 (d,  $J = 8.0$  Hz, 2H), 6.52 (d,  $J = 2.2$  Hz, 2H), 6.39 (t,  $J = 2.2$  Hz, 1H), 6.04 (d,  $J = 7.1$  Hz, 1H), 5.02 (d,  $J = 7.1$  Hz, 1H), 4.65 (dd,  $J = 5.8, 4.8$  Hz, 1H), 4.41 (dd,  $J = 14.3, 4.8$  Hz, 1H),

4.27 (dd,  $J = 14.3, 6.0$  Hz, 1H), 3.73 (s, 6H), 3.41 (s, 3H), 3.39 (s, 3H);  $^{13}C$  NMR (126 MHz,  $CDCl_3$ )  $\delta$  161.4, 156.1, 145.8, 139.6, 129.3, 118.9, 113.7, 105.3, 102.9, 100.3, 55.8, 55.6, 55.4, 53.2, 49.3.

**3h: 7,9-dimethoxy-N-phenyl-11H-benzo[d]tetrazolo[1,5-a]azepin-11-amine.**

The product was obtained using procedure B, 56 mg, 15 % as white solid, m.p. :

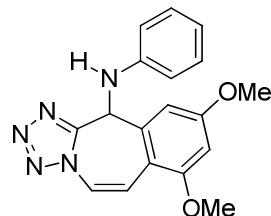

185-187 °C; HRMS (ESI) m/z calcd for  $C_{18}H_{18}N_5O_2$   $[M+H]^+$  : 336.1455; found: 336.1455;  $^1H$  NMR (500 MHz,  $CDCl_3$ )  $\delta$  7.49 (d,  $J = 9.3$  Hz, 1H), 7.31 (d,  $J = 9.3$  Hz, 1H), 7.16 (t,  $J = 7.9$  Hz, 2H), 6.81-6.75 (m, 2H), 6.68 (d,  $J = 8.0$  Hz, 2H), 6.49 (d,  $J = 2.2$  Hz, 1H), 5.61 (s, 1H),

4.90 (s, 1H), 3.89 (s, 3H), 3.77 (s, 3H);  $^{13}C$  NMR (126 MHz,  $CDCl_3$ )  $\delta$  163.3, 158.9, 153.5, 145.8, 138.5, 129.4, 119.1, 118.3, 117.5, 113.6, 112.4, 103.5, 98.5, 56.0, 55.6, 53.0.

**11i: 2-(3-chlorophenyl)-N-((1-(2,2-dimethoxyethyl)-1H-tetrazol-5-yl)(3,4-dimethoxyphenyl)methyl)ethanamine.**

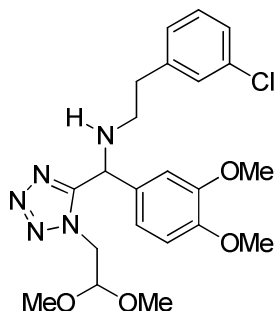

The product was obtained using procedure A, 875 mg, 95 % as oil; HRMS (ESI) m/z calcd for  $C_{22}H_{29}ClN_5O_4$   $[M+H]^+$  : 462.1903; found: 462.1902;  $^1H$  NMR (500 MHz,  $CDCl_3$ )  $\delta$  7.25 – 7.15 (m, 3H), 7.07

(dd,  $J = 7.0, 1.5$  Hz, 1H), 6.83 (s, 3H), 5.24 (s, 1H), 4.56 (t,  $J = 6.0$  Hz, 1H), 4.38 (dd,  $J = 14.2, 5.0$ , 1H), 4.19 (dd,  $J = 14.2, 6.0$ , 1H), 3.87 (s, 3H), 3.82 (s, 3H), 3.34 (s, 6H), 2.91 – 2.76 (m, 4H);  $^{13}\text{C}$  NMR (126 MHz,  $\text{CDCl}_3$ )  $\delta$  156.6, 149.6, 149.2, 141.6, 134.1, 130.1, 129.7, 128.7, 126.9, 126.4, 119.8, 111.1, 110.2, 102.7, 57.0, 55.9, 55.6, 55.4, 49.0, 48.5, 35.9.

**3i: N-(3-chlorophenethyl)-8,9-dimethoxy-11H-benzo[d]tetrazolo[1,5-a]azepin-11-amine.**

The product was obtained using procedure **B**, 107 mg, 27 % as oil; HRMS (ESI)

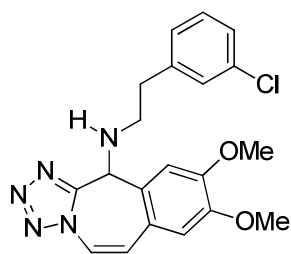

$m/z$  calcd for  $\text{C}_{20}\text{H}_{21}\text{ClN}_5\text{O}_2$   $[\text{M}+\text{H}]^+$  : 398.1378; found: 398.1378;  $^1\text{H}$  NMR (500 MHz,  $\text{CDCl}_3$ )  $\delta$  7.38 (d,  $J = 9.4$  Hz, 1H), 7.18 – 7.16 (m, 2H), 7.05 (s, 1H), 6.98 (s, 1H), 6.93 (td,  $J = 4.6, 1.6$  Hz, 1H), 6.84 (d,  $J = 3.4$  Hz, 1H), 6.65 (d,  $J = 9.4$  Hz, 1H), 5.32 (s, 1H), 3.93 (s, 3H), 3.90

(s, 3H), 2.85-2.77 (m, 1H), 2.73-2.62 (m, 3H);  $^{13}\text{C}$  NMR (126 MHz,  $\text{CDCl}_3$ )  $\delta$  153.3, 151.0, 148.8, 141.2, 134.1, 129.7, 129.2, 128.7, 126.8, 126.4, 123.5, 122.0, 117.8, 113.4, 112.2, 56.3, 56.1, 47.7, 35.3.

**11j: 4-benzyl-1-((1-(2,2-dimethoxyethyl)-1H-tetrazol-5-yl)(3,4-dimethoxyphenyl)methyl)piperidine.**

The product was obtained using procedure **A**, 701 mg, 73 % as oil; HRMS (ESI)

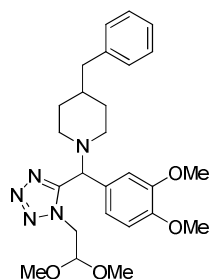

$m/z$  calcd for  $\text{C}_{26}\text{H}_{36}\text{N}_5\text{O}_4$   $[\text{M}+\text{H}]^+$  : 482.2762; found: 482.2761;  $^1\text{H}$  NMR (500 MHz,  $\text{CDCl}_3$ )  $\delta$  7.24 (t,  $J = 7.4$  Hz, 2H), 7.16 (t,  $J = 7.4$  Hz, 1H), 7.10 (d,  $J = 7.0$  Hz, 2H), 6.99 (d,  $J = 1.9$  Hz, 1H), 6.89 (dd,  $J = 8.2, 1.9$  Hz, 1H), 6.80 (d,  $J = 8.2$  Hz, 1H), 4.97 (s, 1H), 4.66 (t,  $J = 5.5$  Hz, 1H), 4.56 (dd,  $J =$

14.1, 5.5 Hz, 1H), 4.37 (dd,  $J = 14.1, 5.5$  Hz, 1H), 3.86 (s, 3H), 3.85 (s, 3H) 3.38 (s, 3H), 3.32 (s, 3H), 2.85 (d,  $J = 11.2$  Hz, 1H), 2.75 (d,  $J = 11.2$  Hz, 1H), 2.51 (d,  $J = 7.1$  Hz, 2H), 2.16 – 2.10 (m, 1H), 1.91 (td,  $J = 11.2, 2.1$  Hz, 1H), 1.61

(dd,  $J = 17.1, 7.1$  Hz, 1H), 1.49 (dd,  $J = 7.4, 3.7$  Hz, 1H), 1.41 – 1.26 (m, 2H);  $^{13}\text{C}$  NMR (126 MHz,  $\text{CDCl}_3$ )  $\delta$  155.6, 149.0, 140.4, 129.0, 128.1, 127.3, 125.7, 121.5, 112.0, 110.6, 102.7, 64.4, 55.9, 55.8, 55.5, 55.4, 51.7, 50.6, 49.1, 43.0, 37.7, 32.2, 32.1.

**3j: 11-(4-benzylpiperidin-1-yl)-8,9-dimethoxy-11H-benzo[d]tetrazolo[1,5-a]azepine.**

The product was obtained using procedure **B**, 171 mg, 41 % as white solid, m.p.:

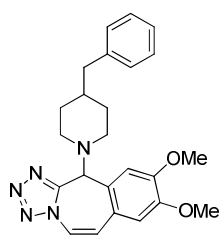

201-202 °C; HRMS (ESI)  $m/z$  calcd for  $\text{C}_{24}\text{H}_{28}\text{N}_5\text{O}_2$   $[\text{M}+\text{H}]^+$  : 418.2238; found: 418.2236;  $^1\text{H}$  NMR (500 MHz,  $\text{CDCl}_3$ )  $\delta$  7.48 (d,  $J = 9.2$  Hz, 1H), 7.21 (t,  $J = 7.5$  Hz, 2H), 7.13 (t,  $J = 7.5$  Hz, 1H), 7.04 (d,  $J = 7.5$  Hz, 2H), 6.87 (s, 1H), 6.85 (s, 1H), 6.72 (d,  $J = 9.2$  Hz, 1H), 4.95 (s, 1H),

3.91 (s, 3H), 3.90 (s, 3H), 2.41 (dd,  $J = 6.5, 3.4$  Hz, 2H), 2.33 (d,  $J = 11.2$  Hz, 1H), 2.24 (d,  $J = 11.2$  Hz, 1H), 1.93 – 1.87 (m, 1H), 1.74 (dd,  $J = 17.1, 5.9$  Hz, 1H), 1.50 – 1.38 (m, 2H), 1.06-0.94 (m, 2H);  $^{13}\text{C}$  NMR (126 MHz,  $\text{CDCl}_3$ )  $\delta$  152.7, 150.4, 148.7, 140.2, 128.8, 127.9, 125.6, 124.4, 122.3, 117.8, 113.9, 113.2, 64.2, 56.0, 55.9, 51.5, 50.7, 42.7, 37.6, 31.6.

**14a: 1-(1-(2,2-dimethoxyethyl)-1H-tetrazol-5-yl)-N-(3,4-dimethoxyphenethyl)-2-methylpropan-1-amine**

The product was obtained using procedure **A**, 730 mg, 93 % as liquid; HRMS

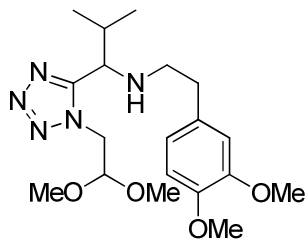

(ESI)  $m/z$  calcd for  $\text{C}_{19}\text{H}_{32}\text{N}_5\text{O}_4$   $[\text{M}+\text{H}]^+$  : 394.2449; found: 394.2448;  $^1\text{H}$  NMR (500 MHz,  $\text{CDCl}_3$ )  $\delta$  6.77 (d,  $J = 8.0$  Hz, 1H), 6.70 – 6.64(m, 2H), 4.78 (t,  $J = 5.5$  Hz, 1H), 4.42 (d,  $J = 5.5$  Hz, 2H), 3.85 (s, 6H), 3.41 (s, 3H), 3.32 (s, 3H), 2.71 – 2.60 (m, 4H), 2.18 - 2.07 (m,

1H), 1.59 (brs, 1H), 0.99 (d,  $J = 6.7$  Hz, 3H), 0.81 (d,  $J = 6.7$  Hz, 3H);  $^{13}\text{C}$  NMR (126 MHz,  $\text{CDCl}_3$ )  $\delta$  156.8, 148.8, 147.3, 132.1, 120.4, 111.7, 111.1, 102.8, 59.2, 55.8, 55.7, 55.5, 49.0, 48.6, 35.7, 32.1, 19.3, 19.0.

**4a: 8-isopropyl-2,3-dimethoxy-6,8,13,13a-tetrahydro-5H-tetrazolo [1',5':4,5]pyrazino[2,1-a]isoquinoline**

The product was obtained using procedure C, 187 mg, 57 % as pale pink solid,

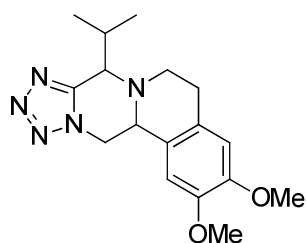

m.p.: 188-190 °C; HRMS (ESI)  $m/z$  calcd for  $\text{C}_{17}\text{H}_{24}\text{N}_5\text{O}_2$   $[\text{M}+\text{H}]^+$  : 330.1925; found: 330.1924;  $^1\text{H}$  NMR (500 MHz,  $\text{CDCl}_3$ )  $\delta$  6.68 (s, 1H), 6.61 (s, 1H), 4.61 (dd,  $J = 13.1, 4.0$  Hz, 1H), 4.44 (dd,  $J = 10.8, 4.0$  Hz, 1H), 4.35 – 4.26 (m, 1H), 3.88 (s, 6H), 3.81 (d,  $J =$

8.0 Hz, 1H), 3.23 – 3.12 (m, 1H), 3.06 (td,  $J = 11.3, 3.1$  Hz, 1H), 2.87 (dd,  $J = 10.9, 6.2$  Hz, 1H), 2.72 (d,  $J = 15.3$  Hz, 1H), 2.25 – 2.12 (m, 1H), 1.17 (d,  $J = 6.6$  Hz, 3H), 1.08 (d,  $J = 6.6$  Hz, 3H);  $^{13}\text{C}$  NMR (126 MHz,  $\text{CDCl}_3$ )  $\delta$  151.9, 148.6, 147.5, 126.3, 124.8, 111.9, 109.3, 64.8, 56.3, 56.1, 55.8, 51.4, 46.6, 46.2, 32.2, 29.1, 19.7

**14b: N-((4-chlorophenyl)(1-(2,2-dimethoxyethyl)-1H-tetrazol-5-yl)methyl)-2-(3,4-dimethoxyphenyl)ethanamine**

The product was obtained using procedure A, 783 mg, 85 % as pale yellow

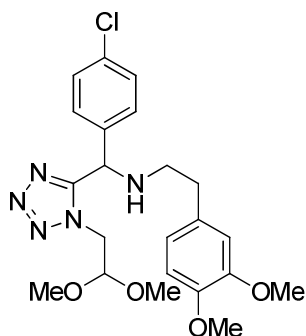

liquid; HRMS (ESI)  $m/z$  calcd for  $\text{C}_{22}\text{H}_{29}\text{ClN}_5\text{O}_4$   $[\text{M}+\text{H}]^+$  : 462.1903; found: 462.1902;  $^1\text{H}$  NMR (500 MHz,  $\text{CDCl}_3$ )  $\delta$  7.31 (d,  $J = 8.4$  Hz, 2H), 7.25 (d,  $J = 8.4$  Hz, 2H), 6.78 (d,  $J = 8.1$  Hz, 1H), 6.70 (m, 2H), 5.26 (s, 1H), 4.56 (t,  $J = 5.4$  Hz, 1H), 4.38 (dd,  $J = 14.2, 5.5$  Hz, 1H), 4.23 (dd,  $J = 14.2, 5.5$  Hz, 1H), 3.85 (s, 3H), 3.84 (s, 3H), 3.33 (s, 3H), 3.29 (s, 3H), 2.85 –



2.72 (m, 4H), 2.05 (brs, 1H);  $^{13}\text{C}$  NMR (126 MHz,  $\text{CDCl}_3$ )  $\delta$  156.2, 148.9, 147.6, 136.4, 134.3, 131.8, 129.1, 128.9, 120.5, 111.8, 111.3, 102.7, 56.5, 55.9, 55.8, 55.6, 55.5, 49.1, 48.8, 35.7.

**4b:8-(4-chlorophenyl)-2,3-dimethoxy-6,8,13,13a-tetrahydro-5H-tetrazolo[1',5':4,5]pyrazino[2,1-a]isoquinoline**

The product was obtained using procedure C, 353 mg, 89 % as white solid,

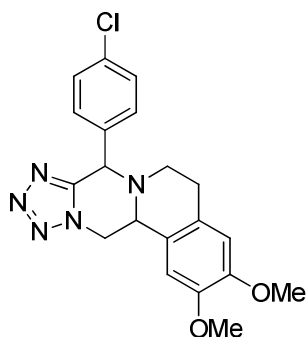

m.p.: 119-121 °C; HRMS (ESI)  $m/z$  calcd for  $\text{C}_{20}\text{H}_{21}\text{ClN}_5\text{O}_2$   $[\text{M}+\text{H}]^+$  : 398.1378; found: 398.1379;  $^1\text{H}$  NMR (500 MHz,  $\text{CDCl}_3$ )  $\delta$  7.31 (d,  $J = 8.4$  Hz, 2H), 7.27 (d,  $J = 8.4$  Hz, 2H), 6.68 (s, 1H), 6.53 (s, 1H), 5.53 (s, 1H), 4.72 (dd,  $J = 11.6, 3.2$  Hz, 1H), 4.39 – 4.27 (m, 2H), 3.88 (s, 3H), 3.84 (s, 3H), 3.17 – 3.05 (m, 2H),

2.97 – 2.87 (m, 2H);  $^{13}\text{C}$  NMR (126 MHz,  $\text{CDCl}_3$ )  $\delta$  151.1, 148.7, 147.7, 134.4, 134.0, 129.2, 128.8, 126.2, 124.3, 111.9, 109.0, 108.7, 60.4, 56.1, 55.9, 50.1, 48.2, 46.0, 29.1.

**14c: 1-(1-(2,2-dimethoxyethyl)-1H-tetrazol-5-yl)-N-(3,4-dimethoxyphenethyl)cyclohexanamine**

The product was obtained using procedure A, 569 mg, 68 % as white solid,

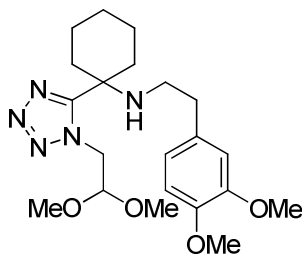

m.p.: 94-96 °C; HRMS (ESI)  $m/z$  calcd for  $\text{C}_{21}\text{H}_{34}\text{N}_5\text{O}_4$   $[\text{M}+\text{H}]^+$  : 420.2605; found: 420.2604;  $^1\text{H}$  NMR (500 MHz,  $\text{CDCl}_3$ )  $\delta$  6.81 (d,  $J = 8.1$  Hz, 1H), 6.69 (dd,  $J = 8.1, 1.6$  Hz, 1H), 6.65 (d,  $J = 1.6$  Hz, 1H), 4.96 (t,  $J = 5.7$  Hz, 1H), 4.66 (d,  $J = 5.7$  Hz, 2H),

3.88 (s, 3H), 3.87 (s, 3H), 3.41 (s, 6H), 2.65 (t,  $J = 6.5$  Hz, 2H), 2.45 (t,  $J = 6.5$  Hz, 2H), 2.14 – 2.04 (m, 2H), 1.99 – 1.90 (m, 2H), 1.68 – 1.56 (m, 2H), 1.51 (s, 1H), 1.40 – 1.31 (m, 3H);  $^{13}\text{C}$  NMR (126 MHz,  $\text{CDCl}_3$ )  $\delta$  158.9, 148.9, 147.5, 132.2, 120.7, 111.5, 111.3, 103.1, 55.8, 55.7, 55.6, 55.5, 55.5, 55.3, 49.9, 43.1, 35.9, 34.6, 24.9, 21.3.

**4c: 2',3'-dimethoxy-5',6',13',13a'-tetrahydrospiro[cyclohexane-1,8'-tetrazolo[1',5':4,5]pyrazino[2,1-a]isoquinoline]**

The product was obtained using procedure C, 273 mg, 77 % as white solid,

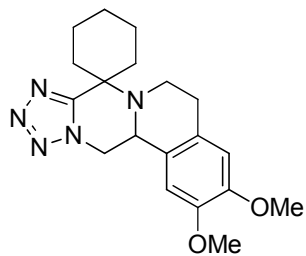

m.p.: 228-230 °C; HRMS (ESI)  $m/z$  calcd for  $C_{19}H_{26}N_5O_2$   $[M+H]^+$  : 356.2081; found: 356.2081;  $^1H$  NMR (500 MHz,  $CDCl_3$ )  $\delta$  6.69 (s, 1H), 6.61 (s, 1H), 4.66 (dd,  $J = 11.1, 4.9$  Hz, 1H), 4.56 (dd,  $J = 13.1, 4.9$  Hz, 1H), 4.32 (dd,  $J = 13.1, 11.1$  Hz, 1H), 3.88 (s, 6H),

3.20 – 3.12 (m, 1H), 3.09 – 3.00 (m, 1H), 2.81 – 2.75 (m, 1H), 2.73 – 2.64 (m, 1H), 2.38 – 2.28 (m, 1H), 2.20-2.06 (m, 2H), 2.00 – 1.91 (m, 1H), 1.84 – 1.73 (m, 2H), 1.69 – 1.50 (m, 4H);  $^{13}C$  NMR (126 MHz, )  $\delta$  156.6, 148.6, 147.5, 126.6, 125.7, 111.7, 109.3, 57.1, 56.1, 56.0, 55.8, 50.3, 46.7, 37.5, 35.3, 32.3, 29.4, 25.3, 20.8.

**14d: N-(2-(1H-indol-3-yl)ethyl)-1-(1-(2,2-dimethoxyethyl)-1H-tetrazol-5-yl)cyclohexanamine**

The product was obtained using procedure A, 748 mg, 94 % as white solid,

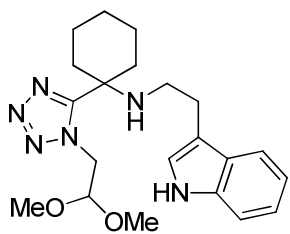

m.p.: 101-103 °C; HRMS (ESI)  $m/z$  calcd for  $C_{21}H_{31}N_6O_2$   $[M+H]^+$  : 399.2503; found: 399.2503;  $^1H$  NMR (500 MHz,  $CDCl_3$ )  $\delta$  8.02 (s, 1H), 7.52 (d,  $J = 8.0$  Hz, 1H), 7.36 (d,  $J = 8.0$  Hz, 1H), 7.20 (t,  $J = 7.5$  Hz, 1H), 7.10 (t,  $J = 7.5$  Hz, 1H), 6.98 (s, 1H), 4.93 (t,  $J = 5.7$  Hz, 1H), 4.66 (d,  $J = 5.7$  Hz, 2H), 3.36 (s, 6H), 2.87 (t,  $J = 6.5$  Hz, 2H), 2.53 (t,  $J = 6.5$  Hz, 2H), 2.13

– 2.01 (m, 2H), 1.96-1.85 (m, 2H), 1.57 – 1.50 (m, 3H), 1.48-1.38 (m, 1H), 1.36 – 1.27 (m, 3H);  $^{13}C$  NMR (126 MHz,  $CDCl_3$ )  $\delta$  159.1, 136.3, 127.2, 121.9, 121.8, 119.2, 118.5, 113.4, 111.2, 102.9, 55.4, 55.3, 49.9, 42.2, 34.7, 25.8, 25.0, 21.3.

**4d: 7',12',12b',13'-tetrahydro-6'H-spiro[cyclohexane-1,4'-tetrazolo [1'',5'':4',5'] pyrazino[1',2':1,2]pyrido[3,4-b]indole]**

The product was obtained using procedure C, 177 mg, 53 % as white solid,

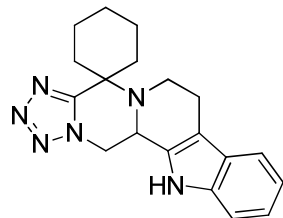

m.p.: 235-237 °C; HRMS (ESI)  $m/z$  calcd for  $C_{19}H_{23}N_6$

$[M+H]^+$  : 335.1979; found: 335.1979;  $^1H$  NMR (500 MHz,

$CDCl_3$ )  $\delta$  8.60 (brs, 1H), 7.54 (d,  $J = 8.0$  Hz, 1H), 7.40 (d,

$J = 8.0$  Hz, 1H), 7.21 (t,  $J = 7.3$  Hz, 1H), 7.15 (t,  $J = 7.3$

Hz, 1H), 4.90 – 4.81 (m, 1H), 4.76 – 4.67 (m, 1H), 4.43-

4.32 (m, 1H), 3.29-3.19 (m, 1H), 3.02 – 2.77 (m, 3H), 2.30-2.18 (m, 2H), 2.14-

2.02 (m, 2H), 1.83 – 1.52 (m, 6H);  $^{13}C$  NMR (126 MHz,  $CDCl_3$ )  $\delta$  157.1, 136.5,

131.0, 126.6, 122.3, 119.9, 118.5, 111.3, 109.9, 57.7, 47.3, 46.8, 39.3, 34.5,

32.9, 25.3, 22.6, 21.1, 21.1.

**14e: N-((1-(2,2-dimethoxyethyl)-1H-tetrazol-5-yl)(4-nitrophenyl)methyl)-2-(1H-indol-3-yl)ethanamine**

The product was obtained using procedure A, 883 mg, 98 % as brown liquid;

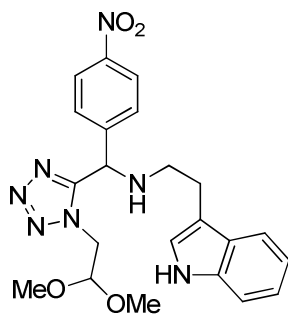

HRMS (ESI)  $m/z$  calcd for  $C_{22}H_{26}N_7O_4$   $[M+H]^+$  :

452.2041; found: 452.2040;  $^1H$  NMR (500 MHz,

$CDCl_3$ )  $\delta$  8.17 (brs, 1H), 8.09 (d,  $J = 8.4$  Hz, 2H), 7.46

(d,  $J = 8.0$  Hz, 1H), 7.43 (d,  $J = 8.4$  Hz, 2H), 7.34 (d,  $J =$

8.0 Hz, 1H), 7.18 (t,  $J = 7.5$  Hz, 1H), 7.05 (t,  $J = 7.5$  Hz,

1H), 7.01 (s, 1H), 5.34 (s, 1H), 4.57 (t,  $J = 5.1$  Hz, 1H),

4.38 (dd,  $J = 14.1, 5.0$  Hz, 1H), 4.30 (dd,  $J = 14.1, 5.0$  Hz, 1H), 3.32 (s, 3H),

3.23 (s, 3H), 3.05-2.82 (m, 4H), 2.13 (brs, 1H);  $^{13}C$  NMR (126 MHz,  $CDCl_3$ )  $\delta$

155.8, 147.7, 145.0, 136.4, 128.7, 128.6, 127.1, 123.9, 122.2, 119.3, 118.5,

112.9, 111.3, 102.4, 56.5, 56.3, 49.2, 47.4, 25.6.

**4e: 4-(4-nitrophenyl)-4,6,7,12,12b,13-hexahydro-tetrazolo[1'',5'':4',5']pyrazino[1',2':1,2]pyrido[3,4-b]indole**

The product was obtained using procedure C, 367 mg, 95 % as white solid,

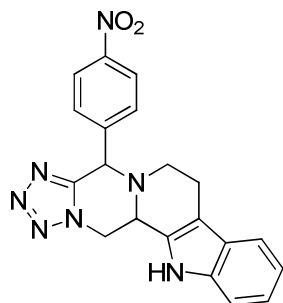

m.p.: decomposes at 236 °C; HRMS (ESI)  $m/z$  calcd for  $C_{20}H_{18}N_7O_2$   $[M+H]^+$  : 388.1517; found: 388.1516;  $^1H$  NMR (500 MHz, DMSO)  $\delta$  11.12 (s, 1H), 8.28 (d,  $J$  = 8.7 Hz, 2H), 7.82 (d,  $J$  = 8.7 Hz, 2H), 7.42 (dd,  $J$  = 13.8, 8.0 Hz, 2H), 7.12 (t,  $J$  = 7.4 Hz, 1H), 7.01 (t,  $J$  = 7.4 Hz, 1H), 5.39 (dd,  $J$  = 12.1, 3.2 Hz, 1H), 5.36 (s, 1H), 4.57

(d,  $J$  = 10.4 Hz, 1H), 4.46 (t,  $J$  = 11.4 Hz, 1H), 2.98 – 2.90 (m, 1H), 2.74 – 2.62 (m, 3H);  $^{13}C$  NMR (126 MHz, DMSO)  $\delta$  153.7, 148.7, 147.0, 137.3, 131.2, 131.1, 127.0, 125.0, 124.9, 122.4, 119.8, 119.0, 118.9, 112.3, 109.0, 62.8, 55.3, 49.6, 49.0, 22.1.

**14f: N-(2-(1H-indol-3-yl)ethyl)-1-benzyl-4-(1-(2,2-dimethoxyethyl)-1H-tetrazol-5-yl)piperidin-4-amine**

The product was obtained using procedure A, 850 mg, 87 % as pale yellow

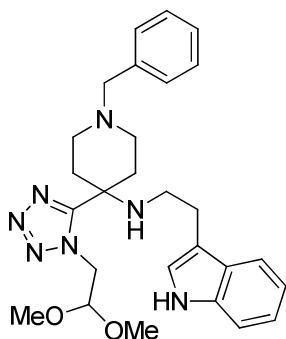

liquid; HRMS (ESI)  $m/z$  calcd for  $C_{27}H_{36}N_7O_2$   $[M+H]^+$  : 490.2925; found: 490.2925;  $^1H$  NMR (500 MHz,  $CDCl_3$ )  $\delta$  8.11 (s, 1H), 7.50 (d,  $J$  = 7.9 Hz, 1H), 7.38 (d,  $J$  = 8.1 Hz, 1H), 7.31 – 7.17 (m, 6H), 7.10 (t,  $J$  = 7.4 Hz, 1H), 6.95 (s, 1H), 4.89 (t,  $J$  = 5.7 Hz, 1H), 4.60 (d,  $J$  = 5.6 Hz, 2H), 3.34 (s, 6H), 3.31 (s, 2H), 2.85 (t,  $J$  = 6.3 Hz, 2H),

2.52 (t,  $J$  = 6.1 Hz, 2H), 2.45 (s, 2H), 2.34 (d,  $J$  = 9.4 Hz, 2H), 2.17 (s, 2H), 1.90 (s, 2H);  $^{13}C$  NMR (126 MHz,  $CDCl_3$ )  $\delta$  158.2, 138.2, 136.3, 129.0, 128.1, 127.2, 127.0, 122.1, 121.9, 119.4, 118.6, 113.4, 111.2, 103.0, 62.8, 55.4, 53.8, 49.8, 49.0, 42.0, 34.7, 25.7.

**4f: 1-benzyl-7',12',12b',13'-tetrahydro-6'H-spiro[piperidine-4,4'-tetrazolo [1'',5'':4',5']pyrazino[1',2':1,2]pyrido[3,4-b]indole]**

The product was obtained using procedure C, 306 mg, 72 % as white solid,

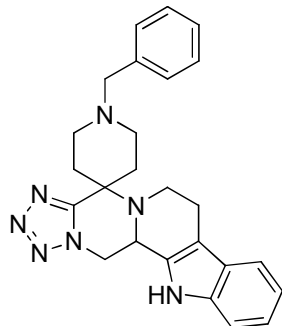

m.p.: 156-158 °C; HRMS (ESI)  $m/z$  calcd for  $C_{25}H_{28}N_7$   $[M+H]^+$  : 426.2401; found: 426.2400;  $^1H$  NMR (500 MHz,  $CDCl_3$ )  $\delta$  8.29 (brs, 1H), 7.55 (d,  $J = 8.0$  Hz, 1H), 7.40 (d,  $J = 8.0$  Hz, 1H), 7.38 – 7.28 (m, 4H), 7.28 – 7.20(m, 2H), 7.16 (t,  $J = 7.3$  Hz, 1H), 4.79 (dd,  $J = 10.4$ , 4.0 Hz, 1H), 4.72 (dd,  $J = 12.8$ , 4.0 Hz, 1H), 4.37 (t,  $J = 11.8$  Hz, 1H), 3.60 (s, 2H), 3.24 – 3.11 (m, 2H), 3.08-2.92 (m, 2H), 2.87 – 2.79 (m, 1H), 2.74 – 2.60 (m, 3H), 2.40-2.34 (m, 2H), 2.24 – 2.13 (m, 1H), 2.01 – 1.91 (m, 1H);  $^{13}C$  NMR (126 MHz,  $CDCl_3$ )  $\delta$  156.6, 138.5, 136.5, 130.7, 129.0, 128.2, 127.0, 126.6, 122.3, 119.8, 118.5, 111.3, 109.8, 62.8, 56.4, 48.8, 48.5, 47.7, 47.0, 39.6, 33.7, 32.7, 22.5.

**14g: N-((1-(2,2-dimethoxyethyl)-1H-tetrazol-5-yl)(3,4,5-trimethoxyphenyl)methyl)-2-(1H-indol-3-yl)ethanamine**

The product was obtained using procedure A, 853 mg, 86 % as pale yellow

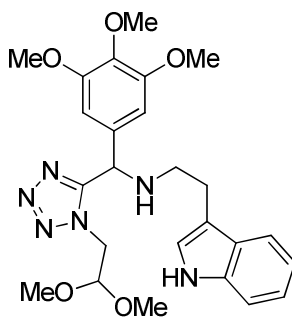

liquid; HRMS (ESI)  $m/z$  calcd for  $C_{25}H_{33}N_6O_5$   $[M+H]^+$  : 497.2507; found: 497.2506;  $^1H$  NMR (500 MHz,  $CDCl_3$ )  $\delta$  8.34 (s, 1H), 7.54 (d,  $J = 8.0$  Hz, 1H), 7.34 (d,  $J = 8.0$  Hz, 1H), 7.16 (t,  $J = 7.5$  Hz, 1H), 7.07 (t,  $J = 7.5$  Hz, 1H), 7.03 (s, 1H), 6.48 (s, 2H), 5.24 (s, 1H), 4.48 (t,  $J = 5.0$  Hz, 1H), 4.37 (dd,  $J = 14.1$ , 5.0 Hz, 1H), 4.25 (dd,  $J = 14.1$ , 5.0 Hz, 1H), 3.80 (s, 3H), 3.71 (s, 6H), 3.29 (s, 3H), 3.28 (s, 3H), 3.07 – 2.91 (m, 4H), 2.17 (s, 1H);  $^{13}C$  NMR (126 MHz,  $CDCl_3$ )  $\delta$  156.5, 153.5, 137.7, 136.3, 133.4, 127.3, 122.2, 122.0, 119.2, 118.6, 113.2, 111.2, 104.3, 102.5, 60.7, 57.4, 56.0, 55.4, 55.2, 48.9, 47.7, 25.6.

**4g: 4-(3,4,5-trimethoxyphenyl)-4,6,7,12,12b,13-hexahydrotetrazolo  
[1'',5'':4',5']pyrazino[1',2':1,2]pyrido[3,4-b]indole**

The product was obtained using procedure C, 138 mg, 32 % as white solid,

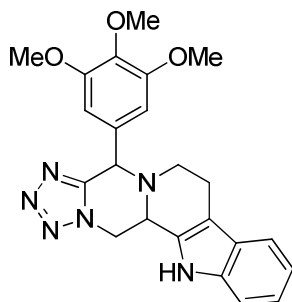

m.p.: 195-197 °C; HRMS (ESI) m/z calcd for

C<sub>23</sub>H<sub>25</sub>N<sub>6</sub>O<sub>3</sub> [M+H]<sup>+</sup> : 433.1983; found: 433.1982; <sup>1</sup>H

NMR (500 MHz, CDCl<sub>3</sub>) δ 8.90 (s, 1H), 7.52 (d, *J* = 7.7

Hz, 1H), 7.34 (d, *J* = 8.1 Hz, 1H), 7.20 (t, *J* = 7.5 Hz,

1H), 7.14 (t, *J* = 7.4 Hz, 1H), 6.69 (s, 2H), 5.02 (dd, *J* =

12.1, 3.2 Hz, 1H), 4.70 (s, 1H), 4.29 (t, *J* = 11.5 Hz,

1H), 4.14 (d, *J* = 10.4 Hz, 1H), 3.85 (s, 3H), 3.80 (s, 6H), 3.21 (dd, *J* = 11.1, 4.3

Hz, 1H), 2.89 – 2.70 (m, 2H), 2.55 – 2.46 (m, 1H); <sup>13</sup>C NMR (126 MHz, CDCl<sub>3</sub>)

δ 153.8, 153.7, 137.9, 136.8, 133.0, 129.0, 126.4, 122.4, 119.8, 118.4, 111.3,

110.3, 105.2, 64.0, 60.8, 56.1, 55.1, 49.4, 48.1, 21.7.

**14h: methyl 2-((1-(1-(2,2-dimethoxyethyl)-1H-tetrazol-5-yl)cyclohexyl)  
amino)-3-(1H-indol-3-yl)propanoate**

The product was obtained using procedure A, 802 mg, 88 % as white solid,

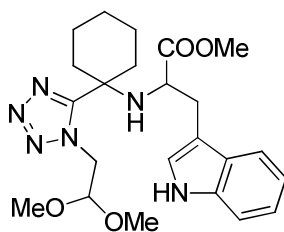

m.p.: 125-127 °C; HRMS (ESI) m/z calcd for

C<sub>23</sub>H<sub>33</sub>N<sub>6</sub>O<sub>4</sub> [M+H]<sup>+</sup> : 457.2558; found: 457.2558; <sup>1</sup>H

NMR (500 MHz, CDCl<sub>3</sub>) δ 8.34 (brs, 1H), 7.45 (d, *J* =

7.5 Hz, 1H), 7.36 (d, *J* = 8.1 Hz, 1H), 7.18 (t, *J* = 7.5 Hz,

1H), 7.09 (t, *J* = 7.5 Hz, 1H), 6.87 (s, 1H), 4.76 (t, *J* = 5.6

Hz, 1H), 4.46 (dd, *J* = 14.4, 5.6 Hz, 1H), 4.09 – 3.98 (m, 1H), 3.49 (s, 3H), 3.42

– 3.35 (m, 1H), 3.32 (s, 3H), 3.29 (s, 3H), 2.99 (dd, *J* = 14.3, 5.0 Hz, 1H), 2.87

(dd, *J* = 14.3, 8.7 Hz, 1H), 2.31-2.15 (d, *J* = 13.2 Hz, 2H), 2.10 (brs, 1H), 1.78 –

1.53 (m, 3H), 1.50 – 1.11 (m, 5H); <sup>13</sup>C NMR (126 MHz, CDCl<sub>3</sub>) δ 176.0, 157.6,

136.0, 127.3, 122.6, 122.2, 119.6, 118.4, 111.2, 111.0, 102.9, 55.8, 55.7, 55.4,

55.2, 51.9, 50.1, 36.0, 35.5, 30.3, 25.1, 22.2, 21.9.

**4h: methyl 7',12',12b',13'-tetrahydro-6'H-spiro[cyclohexane-1,4'-tetrazolo [1'',5'':4',5']pyrazino[1',2':1,2]pyrido[3,4-b]indole]-6'-carboxylate**

The product was obtained using procedure C, 227 mg, 58 % as white solid,

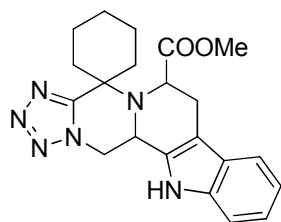

m.p.: 235-237 °C; HRMS (ESI) m/z calcd for C<sub>21</sub>H<sub>25</sub>N<sub>6</sub>O<sub>2</sub>

[M+H]<sup>+</sup> : 393.2034; found: 393.2033; <sup>1</sup>H NMR (500

MHz, CDCl<sub>3</sub>) δ 8.51 (s, 1H), 7.50 (d, *J* = 8.0 Hz, 1H),

7.29 (d, *J* = 8.0 Hz, 1H), 7.17 (t, *J* = 7.5 Hz, 1H), 7.12 (t,

*J* = 7.5 Hz, 1H), 5.30 (d, *J* = 9.6 Hz, 1H), 5.00 (dd, *J* =

12.1, 3.1 Hz, 1H), 4.51 (d, *J* = 4.5 Hz, 1H), 3.91 (t, *J* = 11.4 Hz, 1H), 3.56 (s,

3H), 3.27 (d, *J* = 15.1 Hz, 1H), 3.16 (dd, *J* = 15.1, 4.5 Hz, 1H), 2.47 – 2.24 (m,

2H), 2.15-2.00 (m, 2H), 1.91 – 1.87 (m, 1H), 1.74 – 1.58 (m, 3H), 1.45 (td, *J* =

13.1, 4.1 Hz, 1H), 1.28 – 1.15 (m, 1H); <sup>13</sup>C NMR (126 MHz, CDCl<sub>3</sub>) δ 175.2,

156.1, 136.7, 131.3, 126.5, 122.2, 119.7, 118.2, 111.4, 106.8, 60.1, 52.4, 52.0,

51.5, 48.1, 35.6, 32.3, 27.5, 25.1, 22.0, 21.8.

**14i: methyl 2-(((4-chlorophenyl)(1-(2,2-dimethoxyethyl)-1H-tetrazol-5-yl)methyl) amino)-3-(1H-indol-3-yl)propanoate**

The product was obtained using procedure A, 847 mg, 85 % as colorless liquid;

HRMS (ESI) m/z calcd for C<sub>24</sub>H<sub>28</sub>ClN<sub>6</sub>O<sub>4</sub> [M+H]<sup>+</sup> :

499.1855; found: 499.1855; <sup>1</sup>H NMR (500 MHz, CDCl<sub>3</sub>)

(*major diastereomer*) δ 8.25 (s, 1H), 7.38-7.30 (m, 2H),

7.27 – 7.17 (m, 4H), 7.06 – 6.95 (m, 2H), 6.90 (s, 1H),

5.23 (s, 1H), 4.63 – 4.55 (m, 2H), 4.43 – 4.33 (m, 1H),

4.12 – 4.05 (m, 1H), 3.74 (s, 3H), 3.39 (s, 3H), 3.30 –

3.20 (m, 4H), 2.99 (dd, *J* = 14.2, 9.4 Hz, 1H); <sup>13</sup>C NMR (126 MHz, CDCl<sub>3</sub>)

(*major diastereomer*) δ 174.1, 156.2, 136.0, 134.9, 134.3, 129.1, 128.7, 126.9,

123.3, 122.4, 119.6, 118.5, 111.3, 110.4, 102.7, 57.7, 55.7, 55.3, 54.3, 52.1,

49.0, 29.4. *diastereomeric ratio* = 3:2

**4i: methyl 4-(4-chlorophenyl)-4,6,7,12,12b,13-hexahydrotetrazolo  
[1'',5'':4',5']pyrazino[1',2':1,2]pyrido[3,4-b]indole-6-carboxylate**

The product was obtained using procedure C, 369 mg, 85 % as pale yellow

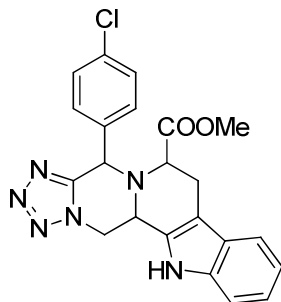

solid, m.p.: 170-172 °C; HRMS (ESI) m/z calcd for

C<sub>22</sub>H<sub>20</sub>N<sub>6</sub>O<sub>2</sub> [M+H]<sup>+</sup> : 435.1331; found: 435.1331; <sup>1</sup>H

NMR (500 MHz, CDCl<sub>3</sub>) δ 8.79 (s, 1H), 7.51 (d, *J* = 7.5

Hz, 1H), 7.40 – 7.28 (m, 5H), 7.21 (t, *J* = 7.5 Hz, 1H),

7.14 (t, *J* = 7.5 Hz, 1H), 5.82 (s, 1H), 5.14 (d, *J* = 9.7

Hz, 2H), 4.21 (t, *J* = 12.0 Hz, 1H), 3.82 (d, *J* = 5.0 Hz,

1H), 3.57 (s, 3H), 3.27 (d, *J* = 15.3 Hz, 1H), 3.04 (dd, *J* = 15.3, 5.3 Hz, 1H); <sup>13</sup>C

NMR (126 MHz, CDCl<sub>3</sub>) δ 172.2, 153.8, 136.9, 135.4, 135.3, 129.9, 129.7,

128.7, 126.2, 122.5, 119.7, 118.3, 111.5, 107.4, 60.5, 55.3, 51.9, 51.3, 50.8,

25.0. *diastereomeric ratio* = 9:1

**14j: methyl 2-(((1-(2,2-dimethoxyethyl)-1H-tetrazol-5-yl)(phenyl)methyl)  
amino)-3-(1H-indol-3-yl)propanoate**

The product was obtained using procedure A, 798 mg, 86 % as white solid,

m.p.: 63-65 °C; HRMS (ESI) m/z calcd for C<sub>24</sub>H<sub>29</sub>N<sub>6</sub>O<sub>4</sub>

[M+H]<sup>+</sup> : 465.2245; found: 465.2246; <sup>1</sup>H NMR (500

MHz, CDCl<sub>3</sub>) (*major diastereomer*) δ 8.32 (s, 1H), 7.38 –

7.25 (m, 3H), 7.20 – 7.14 (m, 2H), 7.13 – 7.06 (m, 2H),

7.04 - 6.98 (m, 2H), 5.29 (s, 1H), 4.54 – 4.46 (m, 2H),

4.34 – 4.27 (m, 1H), 4.07 (dd, *J* = 8.5, 5.5 Hz, 1H), 3.70 (s, 3H), 3.35 (s, 3H),

3.28 (dd, *J* = 14.2, 4.8 Hz, 1H), 3.24 (s, 3H), 3.05 (dd, *J* = 14.4, 8.6 Hz, 1H),

2.68 (brs, 1H); <sup>13</sup>C NMR (126 MHz, CDCl<sub>3</sub>) (*major diastereomer*) δ 174.2,

156.5, 136.5, 136.3, 128.7, 128.4, 127.8, 127.1, 123.3, 122.1, 119.5, 118.5,

111.3, 110.4, 102.5, 59.7, 57.9, 55.4, 55.0, 52.0, 48.9, 29.1. *diastereomeric ratio*

= 2:1



**4j: methyl 4-phenyl-4,6,7,12,12b,13-hexahydro-1,2,4-triazolo[1',5'':4',5']pyrazino[1',2':1,2]pyrido[3,4-b]indole-6-carboxylate**

The product was obtained using procedure C, 296 mg, 74 % as white solid, m.p.: 165-167 °C; HRMS (ESI) m/z calcd for C<sub>22</sub>H<sub>21</sub>N<sub>6</sub>O<sub>2</sub>

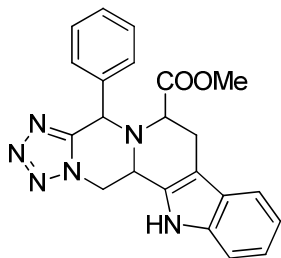

[M+H]<sup>+</sup> : 401.1721; found: 401.1719; <sup>1</sup>H NMR (500 MHz, CDCl<sub>3</sub>) (*major diastereomer*) δ 8.28 (s, 1H), 7.72 (d, *J* = 7.7 Hz, 1H), 7.77-7.30 (m, 5H), 7.25-7.10 (m, 3H), 5.83 (s, 1H), 5.16 (d, *J* = 10.2 Hz, 1H), 5.06 (d, *J* = 12.2 Hz, 1H), 4.34 – 4.22 (m, 1H), 3.89 (d, *J* = 4.9 Hz, 1H), 3.58 (s, 3H), 3.25 (d, *J* = 15.4 Hz, 1H), 3.05 (dd, *J* = 15.4,

5.5 Hz, 1H); <sup>13</sup>C NMR (126 MHz, CDCl<sub>3</sub>) (*major diastereomer*) δ 172.3, 154.2, 136.9, 136.5, 129.3, 129.2, 128.9, 128.6, 126.2, 122.2, 119.5, 118.1, 111.5, 107.2, 61.0, 58.1, 51.6, 51.2, 46.4, 22.6. *diastereomeric ratio* = 2:1

## Computational Chemical Descriptors

A virtual library of 100,000 randomly generated compounds were made for each library using previously described methods (Koes, D. et al. PLoS One 2012, 7, e32839.). 1000 compounds of each reaction were randomly selected and physiochemical properties relating to drug likeness were analyzed via ChemAxon's Instant JChem Software (Instant JChem 5.9.2, 2012, ChemAxon <http://www.chemaxon.com>). Principal moment of inertia was calculated using Schrodinger's Maestro V 9.3(Suite 2012: Maestro, version 9.3, Schrödinger, LLC, New York, NY, 2012.)

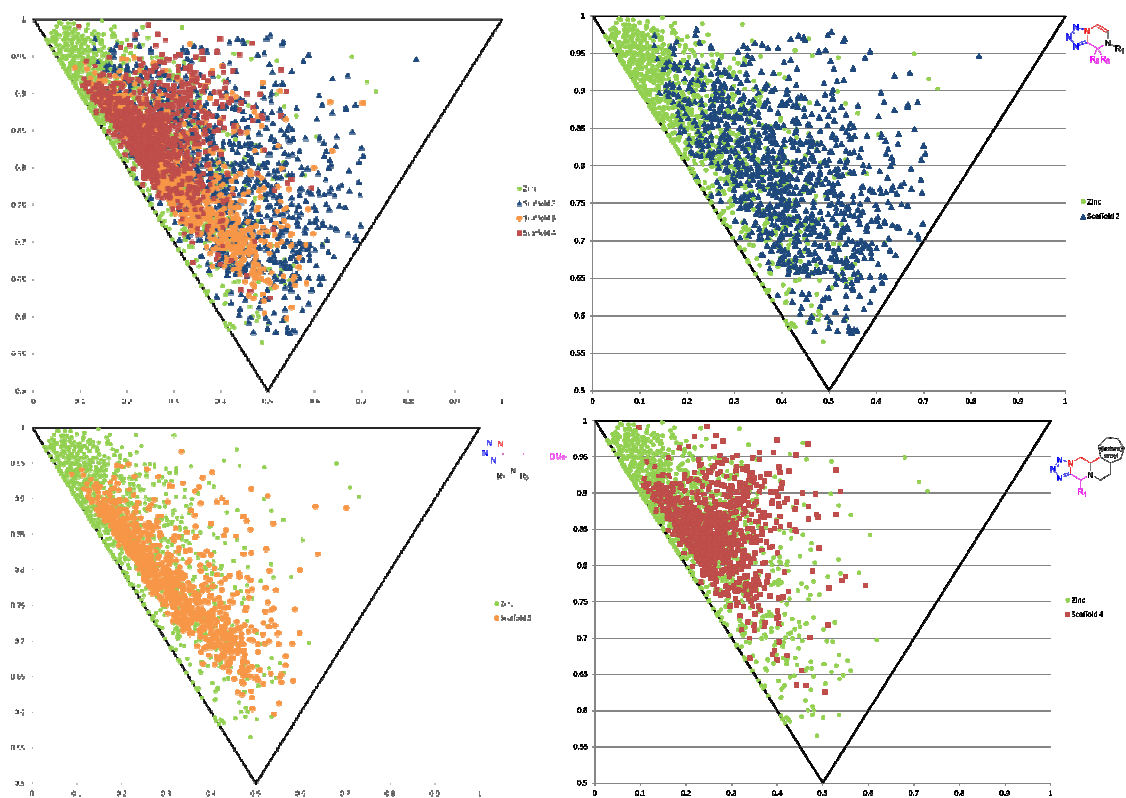

**SI Figure 1:** Principal component analysis of our three scaffolds described in this paper and 1000 randomly selected compounds from the zinc database. (Top left) Overlap of all three scaffolds and ZINC compounds. (Top right) Overlap of Scaffold 2 and ZINC database. (Bottom left) Overlap of Scaffold 3 and ZINC database. (Bottom right) Overlap of Scaffold 4 and ZINC database.

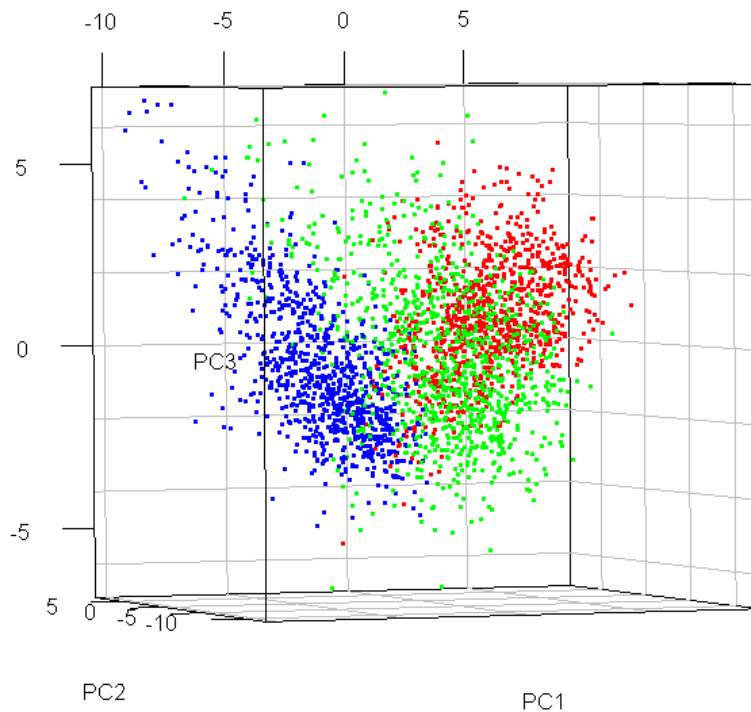

**SI Figure 2:** 3D PCA of 1000 randomly selected compounds of all three scaffolds (green = scaffold 2, blue = scaffold 3, red = scaffold 4).

**PCA Data:**

Importance of components:

|                        | PC1    | PC2    | PC3    | PC4     | PC5    | PC6     | PC7     | PC8     | PC9     | PC10    |
|------------------------|--------|--------|--------|---------|--------|---------|---------|---------|---------|---------|
| Standard deviation     | 3.6154 | 2.64   | 1.9758 | 1.75386 | 1.2311 | 1.14611 | 1.03285 | 0.99559 | 0.81857 | 0.77989 |
| Proportion of Variance | 0.3735 | 0.1991 | 0.1115 | 0.08789 | 0.0433 | 0.03753 | 0.03048 | 0.02832 | 0.01914 | 0.01738 |
| Cumulative Proportion  | 0.3735 | 0.5726 | 0.6841 | 0.77202 | 0.8153 | 0.85285 | 0.88333 | 0.91165 | 0.9308  | 0.94817 |

Rotation:

|                          | PC1     | PC2     | PC3     | PC4     | PC5     | PC6     | PC7     | PC8     | PC9     | PC10    |
|--------------------------|---------|---------|---------|---------|---------|---------|---------|---------|---------|---------|
| Mass                     | 0.0867  | 0.3379  | -0.0188 | 0.1163  | -0.0143 | 0.0370  | -0.0348 | 0.0192  | -0.0048 | 0.0789  |
| donorcount               | -0.0889 | 0.0742  | 0.3558  | 0.1071  | -0.3184 | 0.0217  | 0.2822  | -0.1332 | 0.0138  | -0.2980 |
| donsitecount             | -0.0910 | 0.0719  | 0.3551  | 0.1079  | -0.3126 | 0.0202  | 0.2780  | -0.1317 | 0.0138  | -0.3195 |
| acceptorcount            | -0.1659 | 0.2060  | 0.1546  | 0.0366  | 0.0189  | 0.0657  | -0.3990 | 0.1346  | 0.0203  | 0.1570  |
| accsitecount             | -0.1748 | 0.2053  | 0.1387  | 0.0547  | -0.0156 | 0.0740  | -0.3746 | 0.1253  | 0.0202  | 0.1389  |
| logP                     | 0.1546  | 0.0694  | -0.3528 | 0.1100  | -0.1685 | 0.0158  | 0.0958  | -0.0545 | 0.0218  | -0.0125 |
| pH0                      | 0.1285  | 0.0342  | -0.1990 | 0.2709  | -0.2378 | 0.0979  | -0.0021 | 0.0261  | 0.0104  | 0.2424  |
| pH7                      | 0.1590  | 0.0413  | -0.3411 | 0.0611  | -0.2063 | 0.0216  | 0.0805  | -0.0695 | 0.0234  | 0.0671  |
| pH14                     | 0.2164  | -0.0098 | -0.2576 | 0.0377  | 0.1031  | -0.0268 | 0.1176  | -0.0068 | 0.0118  | -0.0498 |
| PSA                      | -0.0652 | 0.1827  | 0.3486  | 0.1636  | -0.0125 | 0.0744  | -0.0686 | 0.1056  | -0.0160 | 0.1972  |
| Atomcount                | 0.0131  | 0.3490  | -0.1024 | -0.0430 | 0.1202  | -0.0353 | 0.1541  | -0.0322 | 0.0043  | -0.1359 |
| AliphaticAtomCount       | -0.2140 | 0.1956  | -0.0848 | -0.1381 | 0.0694  | -0.0189 | 0.1052  | -0.0217 | 0.0055  | 0.0325  |
| AromaticAtomCount        | 0.2455  | 0.0893  | 0.0606  | 0.1780  | -0.0738 | 0.0437  | -0.1052 | 0.0247  | -0.0106 | 0.0010  |
| BondCount                | 0.0451  | 0.3496  | -0.0839 | -0.0591 | 0.0991  | -0.0263 | 0.1427  | -0.0338 | -0.0004 | -0.1247 |
| AliphaticBond Count      | -0.1816 | 0.2415  | -0.0856 | -0.1735 | 0.0576  | -0.0046 | 0.0795  | -0.0212 | -0.0015 | 0.0366  |
| AromaticBond Count       | 0.2478  | 0.0889  | 0.0721  | 0.1655  | -0.0779 | 0.0396  | -0.0800 | 0.0173  | -0.0108 | 0.0028  |
| RotatableBond Count      | -0.1641 | 0.1958  | -0.0780 | 0.2371  | 0.1640  | 0.0106  | 0.1159  | -0.0170 | -0.0535 | 0.0260  |
| RingCount                | 0.2329  | 0.1592  | 0.0863  | -0.1333 | -0.0963 | 0.0477  | -0.0123 | -0.0260 | -0.0311 | 0.0191  |
| AliphaticRingCount       | -0.0329 | 0.1499  | -0.0199 | -0.4976 | -0.0762 | 0.0419  | 0.0114  | -0.0657 | -0.0291 | -0.0171 |
| AromaticRingCount        | 0.2527  | 0.0762  | 0.0979  | 0.1446  | -0.0542 | 0.0245  | -0.0188 | 0.0106  | -0.0150 | 0.0288  |
| HeteroRingCount          | 0.2252  | 0.0256  | 0.1907  | -0.1291 | 0.2155  | -0.0752 | 0.1109  | 0.0286  | 0.0110  | 0.1289  |
| HeteroaliphaticRingCount | 0.1248  | 0.1218  | 0.0887  | -0.3805 | 0.2190  | -0.0908 | -0.0447 | -0.0084 | 0.0695  | -0.0910 |
| HeteroaromaticRingCount  | 0.2248  | -0.0392 | 0.2005  | 0.0570  | 0.1552  | -0.0455 | 0.1746  | 0.0432  | -0.0272 | 0.2264  |
| RingAtomCount            | 0.2260  | 0.1785  | 0.0185  | -0.0772 | -0.1504 | 0.0611  | -0.1412 | 0.0231  | -0.0125 | 0.0054  |
| RingBondCount            | 0.2272  | 0.1803  | 0.0452  | -0.1161 | -0.1454 | 0.0427  | -0.0894 | 0.0042  | -0.0024 | -0.0059 |
| ChainAtomCount           | -0.2070 | 0.1505  | -0.0405 | 0.2166  | 0.1865  | -0.0412 | 0.1699  | -0.0216 | 0.0078  | 0.0370  |
| ChainBondCount           | -0.1863 | 0.1793  | -0.0626 | 0.2677  | 0.1871  | -0.0076 | 0.1163  | -0.0043 | -0.0176 | 0.0651  |
| SmallestRingSize         | 0.0044  | 0.0478  | 0.0187  | 0.0793  | -0.0964 | -0.6832 | -0.0868 | -0.0028 | 0.6961  | 0.0308  |
| LargestRingSize          | -0.1756 | 0.0788  | -0.1144 | -0.1618 | -0.4112 | 0.0002  | 0.0209  | 0.0360  | 0.0046  | 0.2064  |
| RingCountofSize4         | -0.0003 | -0.0445 | 0.0118  | -0.0576 | 0.0985  | 0.6748  | 0.1512  | 0.0189  | 0.7040  | 0.0590  |
| RingCountofSize5         | 0.1622  | 0.0200  | 0.2161  | -0.1284 | -0.0077 | -0.1114 | 0.3838  | -0.0847 | -0.0608 | 0.5636  |
| RingCountofSize6         | 0.2365  | 0.1268  | 0.0180  | 0.0046  | 0.0481  | 0.0264  | -0.2228 | 0.0196  | 0.0407  | -0.3503 |
| RingCountofSize7         | -0.2007 | 0.0830  | -0.0955 | -0.1535 | -0.3610 | 0.0079  | -0.0496 | -0.1125 | 0.0008  | 0.1794  |
| RingCountofSize8         | -0.0091 | 0.0023  | -0.0413 | -0.0694 | -0.1296 | -0.0479 | 0.2559  | 0.9359  | -0.0166 | -0.1073 |
| VDWVol                   | 0.0458  | 0.3619  | -0.0857 | 0.0467  | 0.0585  | -0.0033 | 0.0647  | -0.0094 | 0.0020  | -0.0511 |

## Single Crystal X-Ray Structure Determination of Compounds **3C**, **2E** and **4F**

### *General:*

Data were collected on an X-ray single crystal diffractometer equipped with a CCD detector (APEX II,  $\kappa$ -CCD), a rotating anode (Bruker AXS, FR591) with MoK $_{\alpha}$  radiation ( $\lambda = 0.71073 \text{ \AA}$ ) and a MONTEL-type focusing optic (compound **4F**) or a fine-focussed sealed tube (Bruker AXS, D8), respectively (compounds **3C** and **2E**) and a graphite monochromator by using the SMART software package. [1] The measurements were performed on single crystals coated with perfluorinated ether. The crystals were fixed on the top of a cactus prickle (*Opuntia ficus-india*) and transferred to the diffractometer. The crystals were frozen under a stream of cold nitrogen. A matrix scan was used to determine the initial lattice parameters. Reflections were merged and corrected for Lorenz and polarization effects, scan speed, and background using SAINT. [2] Absorption corrections, including odd and even ordered spherical harmonics were performed using SADABS. [2] Space group assignments were based upon systematic absences, *E* statistics, and successful refinement of the structures. Structures were solved by direct methods with the aid of successive difference Fourier maps, and were refined against all data using WinGX [7] based on SIR-92. [3] If not mentioned otherwise, non-hydrogen atoms were refined with anisotropic displacement parameters. Hydrogen atoms could be located in the difference Fourier maps and were allowed to refine freely (compounds **2E** and **4F**). Unless otherwise noticed, methyl hydrogen atoms were refined as part of rigid rotating groups, with a C–H distance of 0.98  $\text{\AA}$  and  $U_{\text{iso(H)}} = 1.5 \cdot U_{\text{eq(C)}}$ . Other H atoms were placed in calculated positions and refined using a riding model, with methyne, methylene and aromatic C–H distances of 1.00, 0.99 and 0.95  $\text{\AA}$ , respectively, and  $U_{\text{iso(H)}} = 1.2 \cdot U_{\text{eq(C)}}$ . (compound **3C**). Full-matrix least-squares refinements were carried out by minimizing  $\sum w(F_o^2 - F_c^2)^2$  with

SHELXL-97 [5] weighting scheme. Neutral atom scattering factors for all atoms and anomalous dispersion corrections for the non-hydrogen atoms were taken from *International Tables for Crystallography*. [4] Images of the crystal structures were generated by PLATON. [6] CCDC 1017121 (**2E**), CCDC 1017122 (**4F**), and CCDC 1017123 (**3C**) contains the supplementary crystallographic data for this compound. This data can be obtained free of charge from The Cambridge Crystallographic Data Centre via [www.ccdc.cam.ac.uk/data\\_request/cif](http://www.ccdc.cam.ac.uk/data_request/cif) or via [https://www.ccdc.cam.ac.uk/services/structure\\_deposit/](https://www.ccdc.cam.ac.uk/services/structure_deposit/)

***Special:***

- 3C:** Full refinement was possible without running into problems.  
The hydrogen atom bound to N5 was allowed to refine freely.
- 2E:** Full refinement was possible without running into problems.
- 4F:** Full refinement was possible without running into problems.  
Small extinction effects were cured with the SHELXL procedure.

## Compound 3C

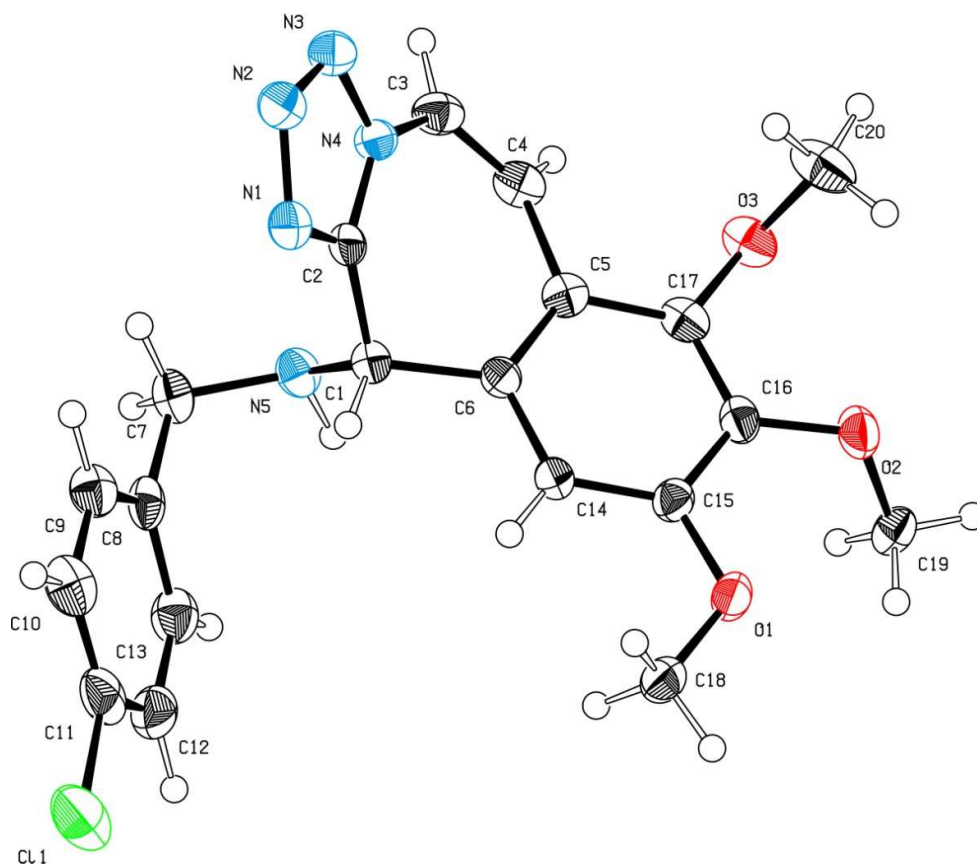

**Figure F1** – Ortep drawing of compound **3C** with 50% ellipsoids. [6]

|                       |                                                                                         |
|-----------------------|-----------------------------------------------------------------------------------------|
| Operator:             | *** Herdtweck ***                                                                       |
| Molecular Formula:    | C <sub>20</sub> H <sub>20</sub> Cl N <sub>5</sub> O <sub>3</sub>                        |
| Crystal Color / Shape | Colorless fragment                                                                      |
| Crystal Size          | Approximate size of crystal fragment used for data collection:<br>0.10 × 0.25 × 0.33 mm |
| Molecular Weight:     | 413.86 a.m.u.                                                                           |
| F <sub>000</sub> :    | 432                                                                                     |
| Systematic Absences:  | none                                                                                    |
| Space Group:          | Triclinic $P\bar{1}$ (I.T.-No.: 2)                                                      |

Cell Constants: Least-squares refinement of 9874 reflections with the programs "APEX suite" and "SAINT" [1,2]; theta range  $1.84^\circ < \theta < 25.38^\circ$ ; Mo( $K\bar{\alpha}$ );  $\lambda = 0.71073 \text{ \AA}$

$a = 9.7930(3) \text{ \AA}$        $\alpha = 76.4624(14)^\circ$   
 $b = 10.1156(3) \text{ \AA}$        $\beta = 89.7725(14)^\circ$   
 $c = 11.4745(3) \text{ \AA}$        $\gamma = 61.9039(15)^\circ$

$V = 967.37(5) \cdot \text{\AA}^3$ ;  $Z = 2$ ;  $D_{\text{calc}} = 1.421 \text{ g cm}^{-3}$ ; Mos. = 0.77

Diffractometer: Kappa APEX II (Area Diffraction System; BRUKER AXS); sealed tube; graphite monochromator; 50 kV; 30 mA;  $\lambda = 0.71073 \text{ \AA}$ ; Mo( $K\bar{\alpha}$ )

Temperature:  $(-150 \pm 1)^\circ\text{C}$ ;  $(123 \pm 1) \text{ K}$

Measurement Range:  $1.84^\circ < \theta < 25.38^\circ$ ; h: -11/11, k: -12/12, l: -13/13

Measurement Time:  $2 \times 15 \text{ s per film}$

Measurement Mode: measured: 7 runs; 1698 films / scaled: 7 runs; 1698 films

$\varphi$ - and  $\omega$ -movement; Increment:  $\Delta\varphi/\Delta\omega = 1.00^\circ$ ; dx = 40.0 mm

LP - Correction: Yes [2]

Intensity Correction: No/Yes; during scaling [2]

Absorption Correction: Multi-scan; during scaling;  $\mu = 0.231 \text{ mm}^{-1}$  [2]

Correction Factors:  $T_{\text{min}} = 0.7056$        $T_{\text{max}} = 0.7452$

Reflection Data: 28405 reflections were integrated and scaled

28405 reflections to be merged

3553 independent reflections

0.022  $R_{\text{int}}$ : (basis  $F_o^2$ )

3553 independent reflections (all) were used in refinements

3077 independent reflections with  $I_o > 2\sigma(I_o)$

99.7 % completeness of the data set

269 parameter full-matrix refinement

13.2 reflections per parameter



|                                  |                                                                                                                                                                                                                                                                                                                |                                                             |
|----------------------------------|----------------------------------------------------------------------------------------------------------------------------------------------------------------------------------------------------------------------------------------------------------------------------------------------------------------|-------------------------------------------------------------|
| Solution:                        | Direct Methods [3, 7]; Difference Fourier syntheses                                                                                                                                                                                                                                                            |                                                             |
| Refinement Parameters:           | In the asymmetric unit:                                                                                                                                                                                                                                                                                        |                                                             |
|                                  | 29                                                                                                                                                                                                                                                                                                             | Non-hydrogen atoms with anisotropic displacement parameters |
|                                  | 1                                                                                                                                                                                                                                                                                                              | Hydrogen atoms with isotropic displacement parameters       |
| Hydrogen Atoms:                  | The N-hydrogen atom positions was found in the difference and was refined with an individual isotropic displacement parameters.                                                                                                                                                                                |                                                             |
| Hydrogen Atoms:                  | All other hydrogen atoms were placed in calculated positions ( $d_{C-H} = 0.95, 0.98, 0.99, 1.00 \text{ \AA}$ ). Isotropic displacement parameters were calculated from the parent carbon atom ( $U_H = 1.2/1.5 U_C$ ). The hydrogen atoms were included in the structure factor calculations but not refined. |                                                             |
| Atomic Form Factors:             | For neutral atoms and anomalous dispersion [4, 5, 7]                                                                                                                                                                                                                                                           |                                                             |
| Extinction Correction:           | no                                                                                                                                                                                                                                                                                                             |                                                             |
| Weighting Scheme:                | $w^{-1} = \sigma^2(F_o^2) + (a * P)^2 + b * P$<br>with a: 0.0435; b: 1.8951; P: $[\text{Maximum}(0 \text{ or } F_o^2) + 2 * F_c^2] / 3$                                                                                                                                                                        |                                                             |
| Shift/Err:                       | Less than 0.001 in the last cycle of refinement:                                                                                                                                                                                                                                                               |                                                             |
| Resid. Electron Density:         | $+1.07 \text{ e}_0^- / \text{\AA}^3$ ; $-0.66 \text{ e}_0^- / \text{\AA}^3$                                                                                                                                                                                                                                    |                                                             |
| R1:                              | $\sum( F_o  -  F_c ) / \sum F_o $                                                                                                                                                                                                                                                                              |                                                             |
| $[F_o > 4\sigma(F_o)$ ; N=3077]: |                                                                                                                                                                                                                                                                                                                | = 0.0584                                                    |
| [all reflctns; N=3553]:          |                                                                                                                                                                                                                                                                                                                | = 0.0672                                                    |
| wR2:                             | $[\sum w(F_o^2 - F_c^2)^2 / \sum w(F_o^2)^2]^{1/2}$                                                                                                                                                                                                                                                            |                                                             |
| $[F_o > 4\sigma(F_o)$ ; N=3077]: |                                                                                                                                                                                                                                                                                                                | = 0.1347                                                    |
| [all reflctns; N=3553]:          |                                                                                                                                                                                                                                                                                                                | = 0.1406                                                    |
| Goodness of fit:                 | $[\sum w(F_o^2 - F_c^2)^2 / (\text{NO} - \text{NV})]^{1/2} = 1.064$                                                                                                                                                                                                                                            |                                                             |
| Remarks:                         | Refinement expression $\sum w(F_o^2 - F_c^2)^2$                                                                                                                                                                                                                                                                |                                                             |

## Compound 2E

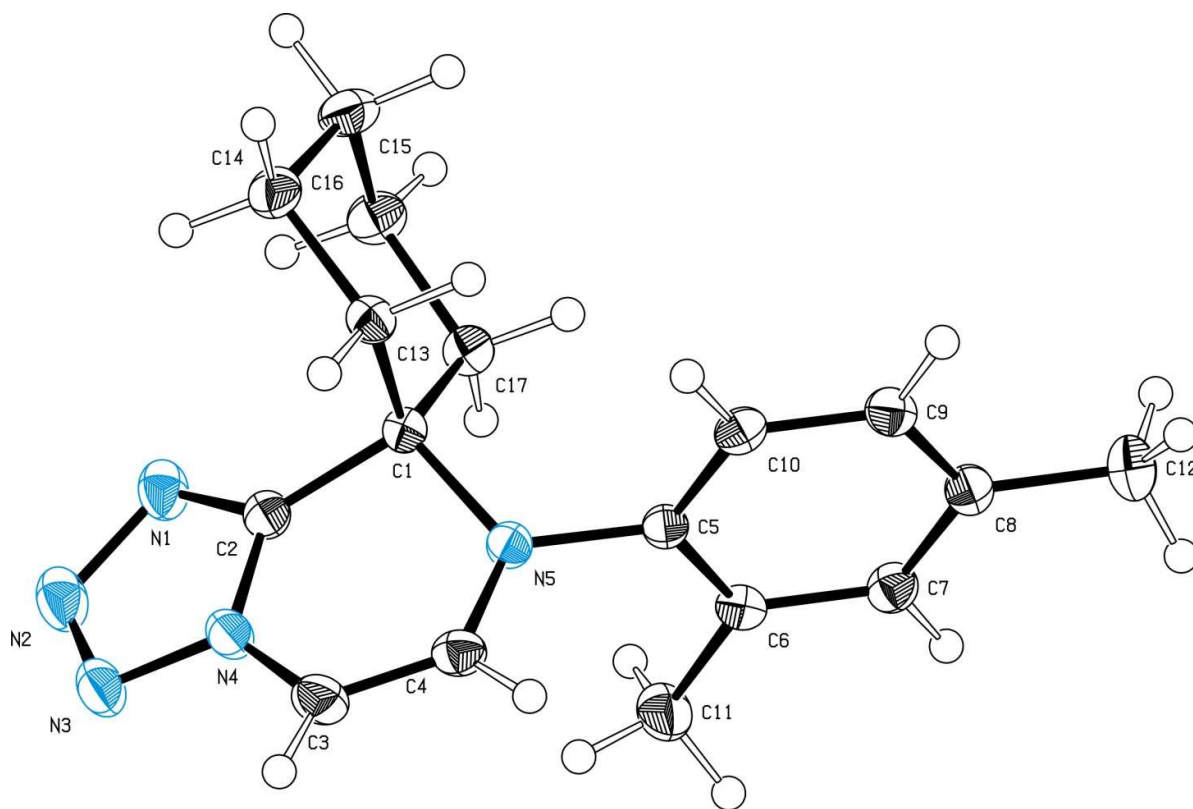

**Figure F2** – Ortep drawing of compound **2E** with 50% ellipsoids. [6]

|                       |                                                                                         |
|-----------------------|-----------------------------------------------------------------------------------------|
| Operator:             | *** Herdtweck ***                                                                       |
| Molecular Formula:    | C <sub>17</sub> H <sub>21</sub> N <sub>5</sub>                                          |
| Crystal Color / Shape | Colorless fragment                                                                      |
| Crystal Size          | Approximate size of crystal fragment used for data collection:<br>0.30 × 0.30 × 0.30 mm |
| Molecular Weight:     | 295.39 a.m.u.                                                                           |
| F <sub>000</sub> :    | 632                                                                                     |
| Systematic Absences:  | h0l: h+l≠2n; 0k0: k≠2n                                                                  |
| Space Group:          | Monoclinic <i>P</i> 2 <sub>1</sub> / <i>n</i> (I.T.-No.: 14)                            |

Cell Constants: Least-squares refinement of 9927 reflections with the programs "APEX suite" and "SAINT" [1,2]; theta range  $2.14^\circ < \theta < 25.39^\circ$ ; Mo( $K\bar{\alpha}$ );  $\lambda = 0.71073 \text{ \AA}$

$a = 8.2232(2) \text{ \AA}$

$b = 15.4975(5) \text{ \AA}$        $\beta = 104.8288(12)^\circ$

$c = 12.4813(4) \text{ \AA}$

$V = 1537.63(8) \cdot \text{\AA}^3$ ;  $Z = 4$ ;  $D_{\text{calc}} = 1.276 \text{ g cm}^{-3}$ ; Mos. = 0.63

Diffractometer: Kappa APEX II (Area Diffraction System; BRUKER AXS); sealed tube; graphite monochromator; 50 kV; 30 mA;  $\lambda = 0.71073 \text{ \AA}$ ; Mo( $K\bar{\alpha}$ )

Temperature:  $(-150 \pm 1)^\circ \text{C}$ ;       $(123 \pm 1) \text{ K}$

Measurement Range:  $2.14^\circ < \theta < 25.39^\circ$ ; h: -9/9, k: -18/18, l: -14/15

Measurement Time:  $2 \times 10 \text{ s}$  per film

Measurement Mode: measured: 12 runs; 3494 films / scaled: 12 runs; 3494 films

$\varphi$ - and  $\omega$ -movement; Increment:  $\Delta\varphi/\Delta\omega = 0.50^\circ$ ; dx = 35.0 mm

LP - Correction: Yes [2]

Intensity Correction: No/Yes; during scaling [2]

Absorption Correction: Multi-scan; during scaling;  $\mu = 0.080 \text{ mm}^{-1}$  [2]

Correction Factors:       $T_{\text{min}} = 0.6914$        $T_{\text{max}} = 0.7452$

Reflection Data: 59840 reflections were integrated and scaled

1408 reflections systematic absent and rejected

58432 reflections to be merged

2820 independent reflections

0.027  $R_{\text{int}}$ : (basis  $F_o^2$ )

2820 independent reflections (all) were used in refinements

2610 independent reflections with  $I_o > 2\sigma(I_o)$

99.9 % completeness of the data set

283 parameter full-matrix refinement

10.0 reflections per parameter

Solution: Direct Methods [3, 7]; Difference Fourier syntheses

Refinement Parameters: In the asymmetric unit:

22 Non-hydrogen atoms with anisotropic displacement parameters

21 Hydrogen atoms with isotropic displacement parameters

Hydrogen Atoms: All hydrogen atom positions were found in the difference map calculated from the model containing all non-hydrogen atoms. The hydrogen positions were refined with individual isotropic displacement parameters.

Atomic Form Factors: For neutral atoms and anomalous dispersion [4, 5, 7]

Extinction Correction: no

Weighting Scheme:  $w^{-1} = \sigma^2(F_o^2) + (a * P)^2 + b * P$   
with a: 0.0441; b: 0.6040; P: [Maximum(0 or  $F_o^2$ ) + 2 \*  $F_c^2$ ]/3

Shift/Err: Less than 0.001 in the last cycle of refinement:

Resid. Electron Density: +0.25 e<sub>0</sub> / Å<sup>3</sup>; -0.18 e<sub>0</sub> / Å<sup>3</sup>

R1:  $\sum(|F_o| - |F_c|) / \sum|F_o|$

[ $F_o > 4\sigma(F_o)$ ; N=2610]: = 0.0338

[all reflctns; N=2820]: = 0.0368

wR2:  $[\sum w(F_o^2 - F_c^2)^2 / \sum w(F_o^2)^2]^{1/2}$

[ $F_o > 4\sigma(F_o)$ ; N=2610]: = 0.0873

[all reflctns; N=2820]: = 0.0901

Goodness of fit:  $[\sum w(F_o^2 - F_c^2)^2 / (NO - NV)]^{1/2}$  = 1.056

Remarks: Refinement expression  $\sum w(F_o^2 - F_c^2)^2$

## Compound 4F

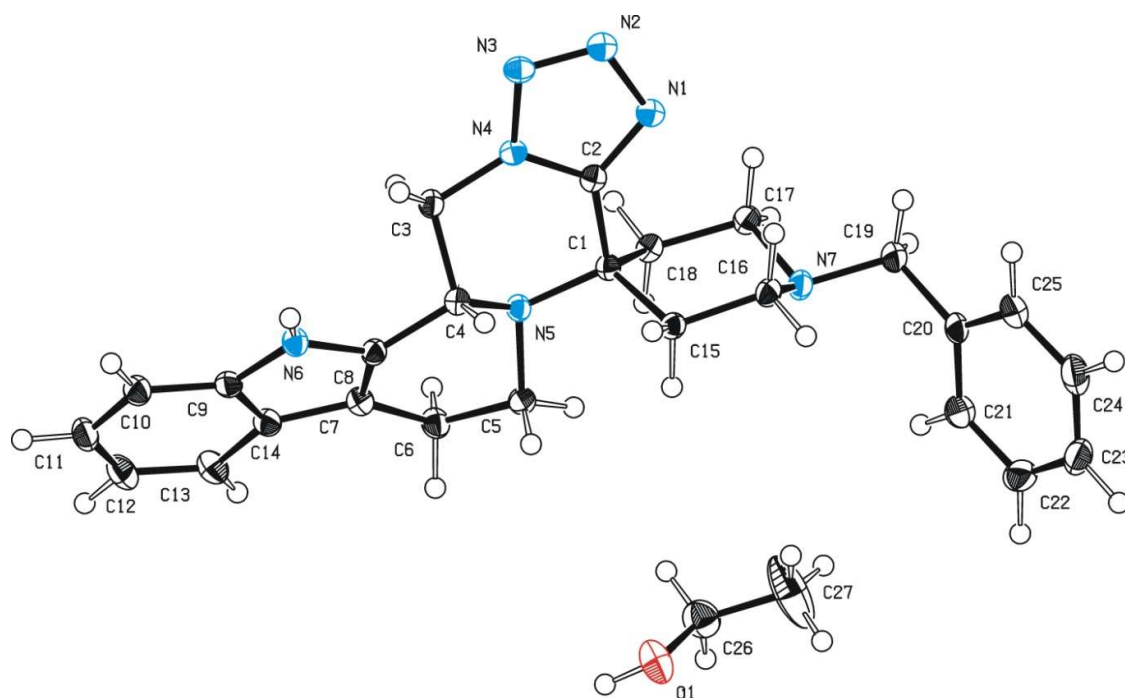

**Figure F3**– Ortep drawing of compound **4F** with 50% ellipsoids. [6]

|                       |                                                                                                                                                                              |
|-----------------------|------------------------------------------------------------------------------------------------------------------------------------------------------------------------------|
| Operator:             | *** Herdtweck ***                                                                                                                                                            |
| Molecular Formula:    | C <sub>27</sub> H <sub>33</sub> N <sub>7</sub> O<br>(C <sub>25</sub> H <sub>27</sub> N <sub>7</sub> ), (C <sub>2</sub> H <sub>6</sub> O)                                     |
| Crystal Color / Shape | Colorless plate                                                                                                                                                              |
| Crystal Size          | Approximate size of crystal fragment used for data collection:<br>0.11 × 0.26 × 0.35 mm                                                                                      |
| Molecular Weight:     | 471.60 a.m.u.                                                                                                                                                                |
| F <sub>000</sub> :    | 504                                                                                                                                                                          |
| Systematic Absences:  | none                                                                                                                                                                         |
| Space Group:          | Triclinic $P\bar{1}$ (I.T.-No.: 2)                                                                                                                                           |
| Cell Constants:       | Least-squares refinement of 9987 reflections with the programs "APEX suite" and "SAINT" [1,2]; theta range 1.42° < $\theta$ < 25.45°; Mo(K $\alpha$ ); $\lambda$ = 71.073 pm |

$a = 858.12(6) \text{ pm}$        $\alpha = 86.569(3)^\circ$   
 $b = 1014.11(7) \text{ pm}$        $\beta = 89.634(3)^\circ$   
 $c = 1431.89(10) \text{ pm}$        $\gamma = 79.327(3)^\circ$   
 $V = 1222.31(15) \cdot 10^6 \text{ pm}^3$ ;  $Z = 2$ ;  $D_{\text{calc}} = 1.281 \text{ g cm}^{-3}$ ; Mos. = 0.63

Diffractometer: Kappa APEX II (Area Diffraction System; BRUKER AXS); rotating anode; graphite monochromator; 50 kV; 60 mA;  $\lambda = 71.073 \text{ pm}$ ; Mo(K $\bar{\alpha}$ )

Temperature:  $(-173 \pm 1)^\circ \text{C}$ ;       $(100 \pm 1) \text{ K}$

Measurement Range:  $1.42^\circ < \theta < 25.45^\circ$ ; h: -10/10, k: -12/12, l: -17/17

Measurement Time:  $2 \times 5 \text{ s}$  per film

Measurement Mode: measured: 15 runs; 6018 films / scaled: 15 runs; 6018 films  
 $\varphi$ - and  $\omega$ -movement; Increment:  $\Delta\varphi/\Delta\omega = 0.50^\circ$ ; dx = 35.0 mm

LP - Correction: Yes [2]

Intensity Correction No/Yes; during scaling [2]

Absorption Correction: Multi-scan; during scaling;  $\mu = 0.082 \text{ mm}^{-1}$  [2]

Correction Factors:       $T_{\text{min}} = 0.7027$        $T_{\text{max}} = 0.7452$

Reflection Data: 30230 reflections were integrated and scaled  
 30230 reflections to be merged  
 4504 independent reflections  
 0.028  $R_{\text{int}}$ : (basis  $F_o^2$ )  
 4504 independent reflections (all) were used in refinements  
 4167 independent reflections with  $I_o > 2\sigma(I_o)$   
 99.5 % completeness of the data set  
 449 parameter full-matrix refinement  
 10.0 reflections per parameter

Solution: Direct Methods [3]; Difference Fourier syntheses

Refinement Parameters: In the asymmetric unit:

|                                                 |                                                                                                                                                                                                                  |
|-------------------------------------------------|------------------------------------------------------------------------------------------------------------------------------------------------------------------------------------------------------------------|
| 35                                              | Non-hydrogen atoms with anisotropic displacement parameters                                                                                                                                                      |
| 33                                              | Hydrogen atoms with isotropic displacement parameters                                                                                                                                                            |
| Hydrogen Atoms:                                 | All hydrogen atom positions were found in the difference map calculated from the model containing all non-hydrogen atoms. The hydrogen positions were refined with individual isotropic displacement parameters. |
| Atomic Form Factors:                            | For neutral atoms and anomalous dispersion [4]                                                                                                                                                                   |
| Extinction Correction:                          | $F_c(\text{korr}) = kF_c[1 + 0.001 \cdot \varepsilon \cdot F_c^2 \cdot \lambda^3 / \sin(2\theta)]^{-1/4}$ SHELXL-97 [5]<br>$\varepsilon$ refined to $\varepsilon = 0.014(2)$                                     |
| Weighting Scheme:                               | $w^{-1} = \sigma^2(F_o^2) + (a \cdot P)^2 + b \cdot P$<br>with a: 0.0368; b: 0.6392; P: $[\text{Maximum}(0 \text{ or } F_o^2) + 2 \cdot F_c^2] / 3$                                                              |
| Shift/Err:                                      | Less than 0.001 in the last cycle of refinement:                                                                                                                                                                 |
| Resid. Electron Density:                        | +0.28 e <sub>0</sub> <sup>-</sup> /Å <sup>3</sup> ; -0.22 e <sub>0</sub> <sup>-</sup> /Å <sup>3</sup>                                                                                                            |
| R1:                                             | $\sum( F_o  -  F_c ) / \sum F_o $                                                                                                                                                                                |
| [F <sub>o</sub> > 4σ(F <sub>o</sub> ); N=4167]: | = 0.0357                                                                                                                                                                                                         |
| [all reflctns; N=4504]:                         | = 0.0385                                                                                                                                                                                                         |
| wR2:                                            | $[\sum w(F_o^2 - F_c^2)^2 / \sum w(F_o^2)^2]^{1/2}$                                                                                                                                                              |
| [F <sub>o</sub> > 4σ(F <sub>o</sub> ); N=4167]: | = 0.0882                                                                                                                                                                                                         |
| [all reflctns; N=4504]:                         | = 0.0909                                                                                                                                                                                                         |
| Goodness of fit:                                | $[\sum w(F_o^2 - F_c^2)^2 / (\text{NO} - \text{NV})]^{1/2}$ = 1.057                                                                                                                                              |
| Remarks:                                        | Refinement expression $\sum w(F_o^2 - F_c^2)^2$                                                                                                                                                                  |

**Crystal Structure References:**

- [1] APEX suite of crystallographic software. APEX 2 Version 2008.4. Bruker AXS Inc., Madison, Wisconsin, USA (2008).
- [2] SAINT, Version 7.56a and SADABS Version 2008/1. Bruker AXS Inc., Madison, Wisconsin, USA (2008).

- [3] Altomare, A.; Cascarano, G.; Giacovazzo, C.; Guagliardi, A.; Burla, M. C.; Polidori, G.; Camalli M. "**SIR92**", *J. Appl. Cryst.* **1994**, *27*, 435-436.
- [4] International Tables for Crystallography, Vol. C, Tables 6.1.1.4 (pp. 500-502), 4.2.6.8 (pp. 219-222), and 4.2.4.2 (pp. 193-199), Wilson, A. J. C., Ed., Kluwer Academic Publishers, Dordrecht, The Netherlands, 1992.
- [5] Sheldrick, G. M. "**SHELXL-97**", University of Göttingen, Göttingen, Germany, (1998).
- [6] Spek, A. L. "**PLATON**", A Multipurpose Crystallographic Tool, Utrecht University, Utrecht, The Netherlands, (2010).
- [7] L. J. Farrugia, "**WinGX** (Version 1.70.01 January 2005) ", *J. Appl. Cryst.* **1999**, *32*, 837-838.



**8a: N-((1-(2,2-dimethoxyethyl)-1H-tetrazol-5-yl)(4-nitrophenyl)methyl)-2-(4-methoxyphenyl)ethanamine**

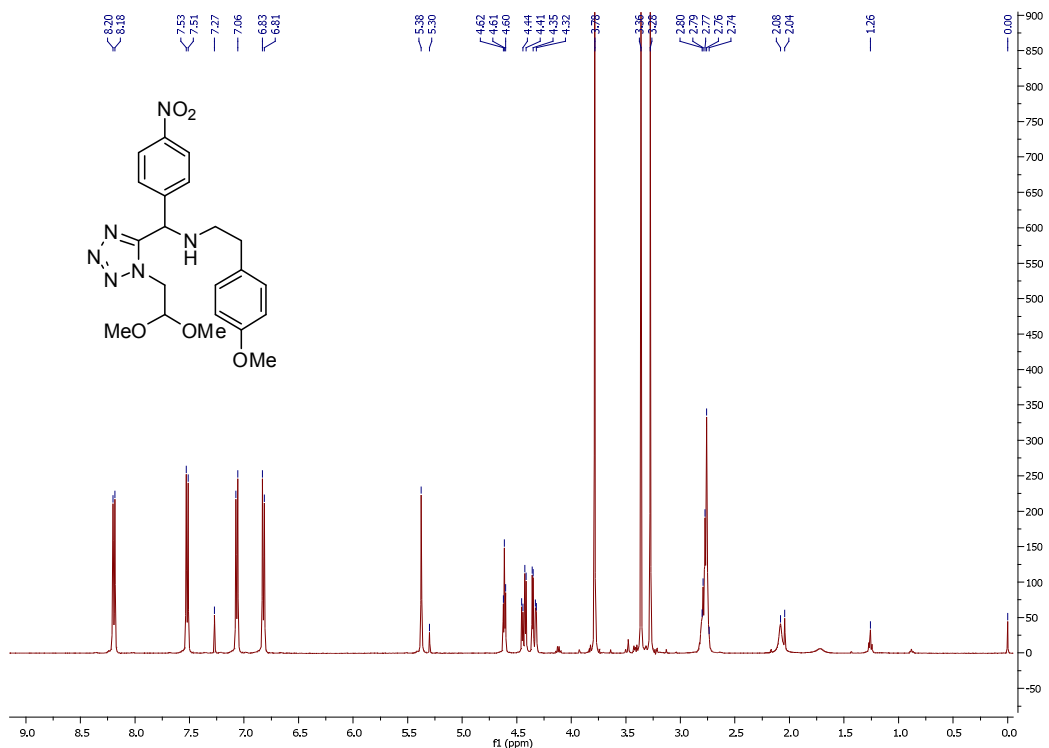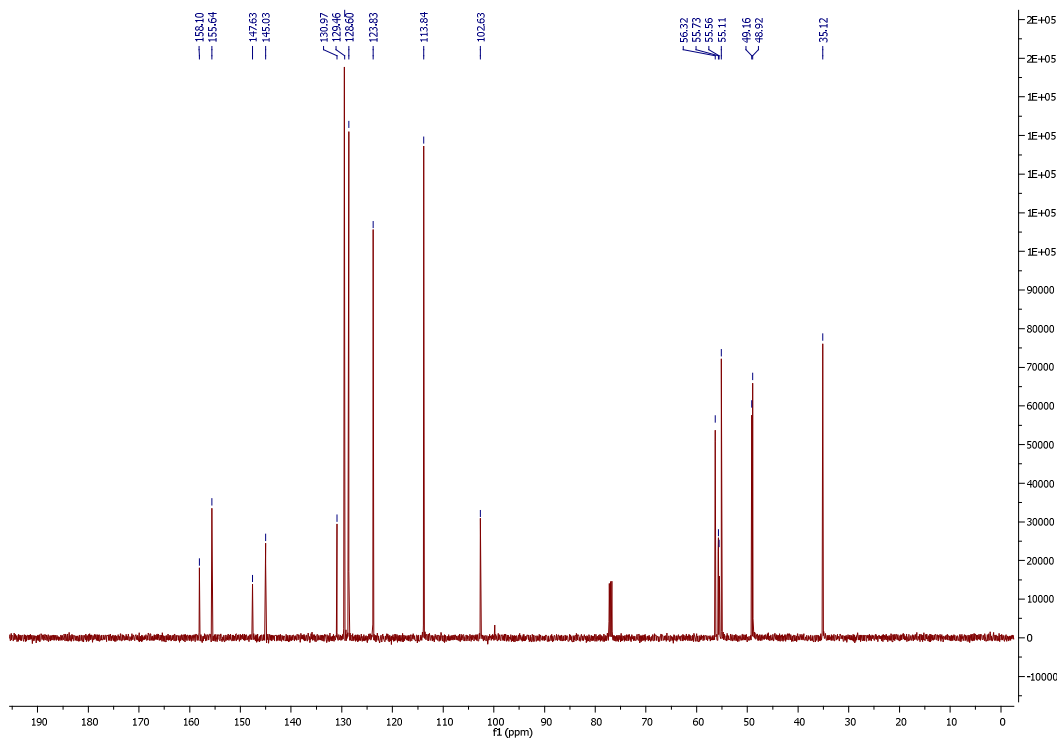

PHP072\_1\_Silica\_4.6X250\_MeOH\_5-30%\_6min

PHP072\_1

3: Diode Array  
Range: 5.51e+1

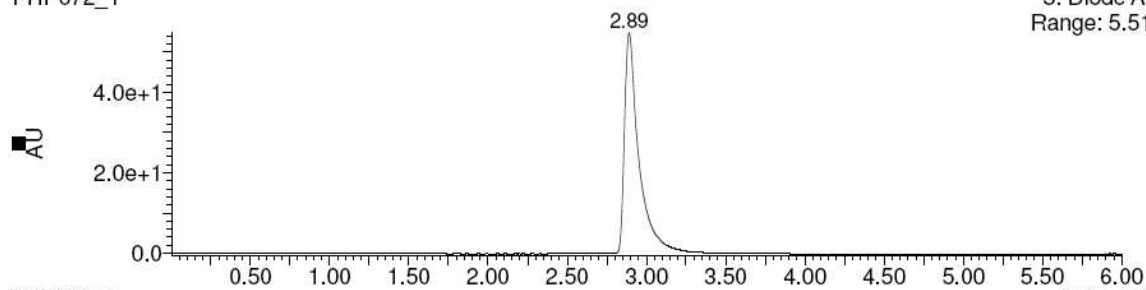

PHP072\_1

2: Scan ES-  
441.2  
1.11e7

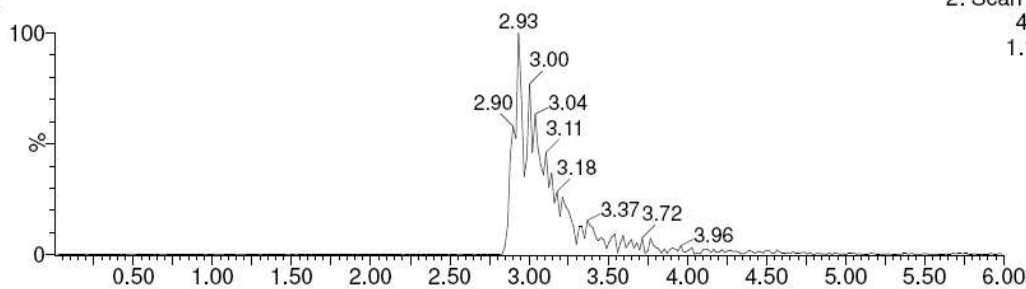

PHP072\_1\_Silica\_4.6X250\_MeOH\_5-30%\_6min

PHP072\_1 168 (2.917)

2: Scan ES-  
5.28e6

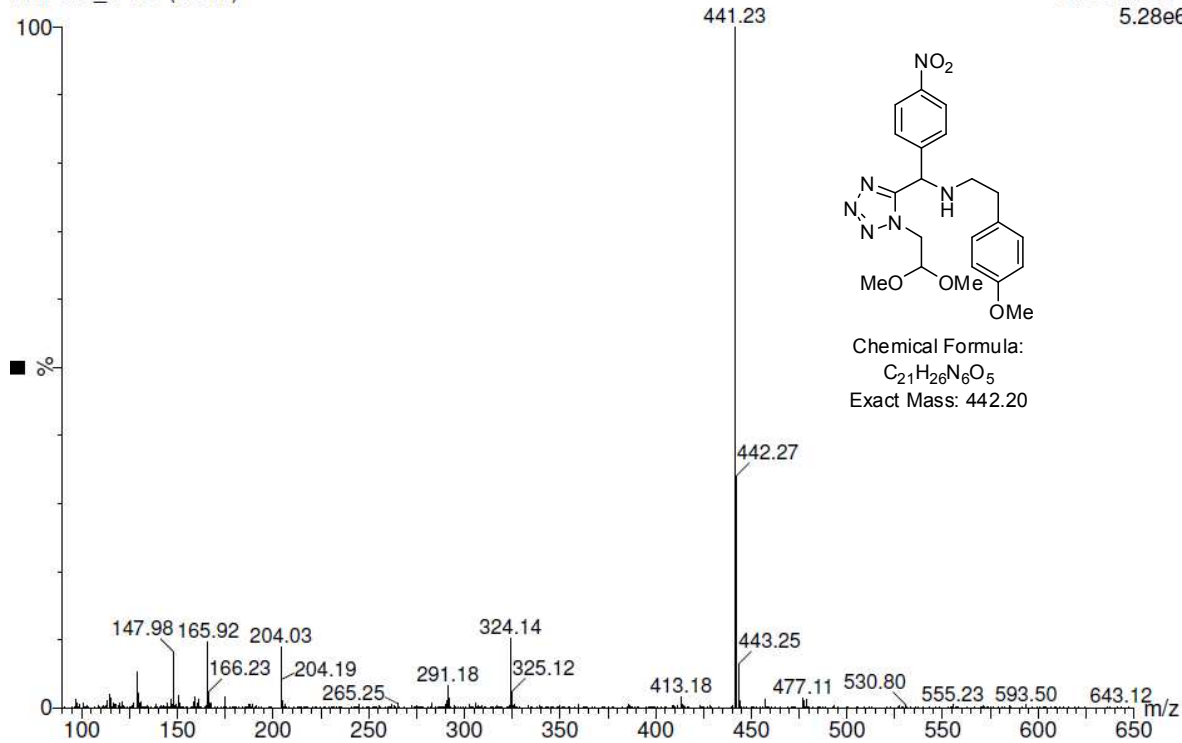

**2a: 7-(4-methoxyphenethyl)-8-(4-nitrophenyl)-7,8-dihydro-1,5-benzodiazepine.**

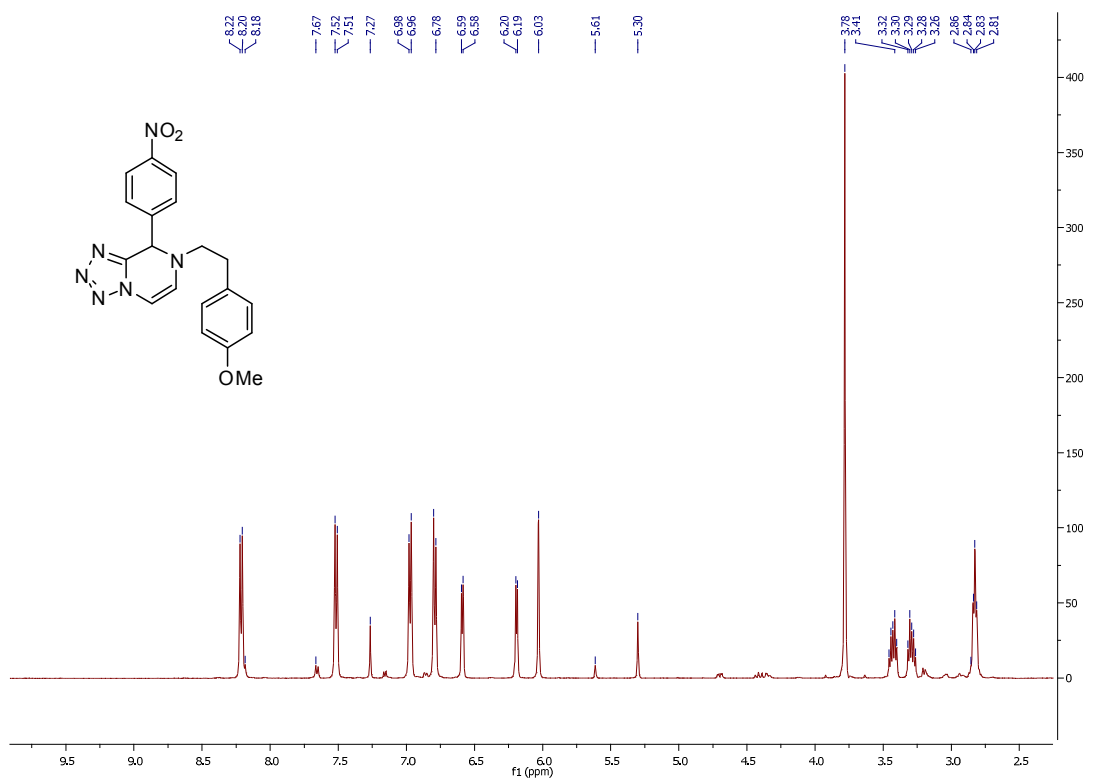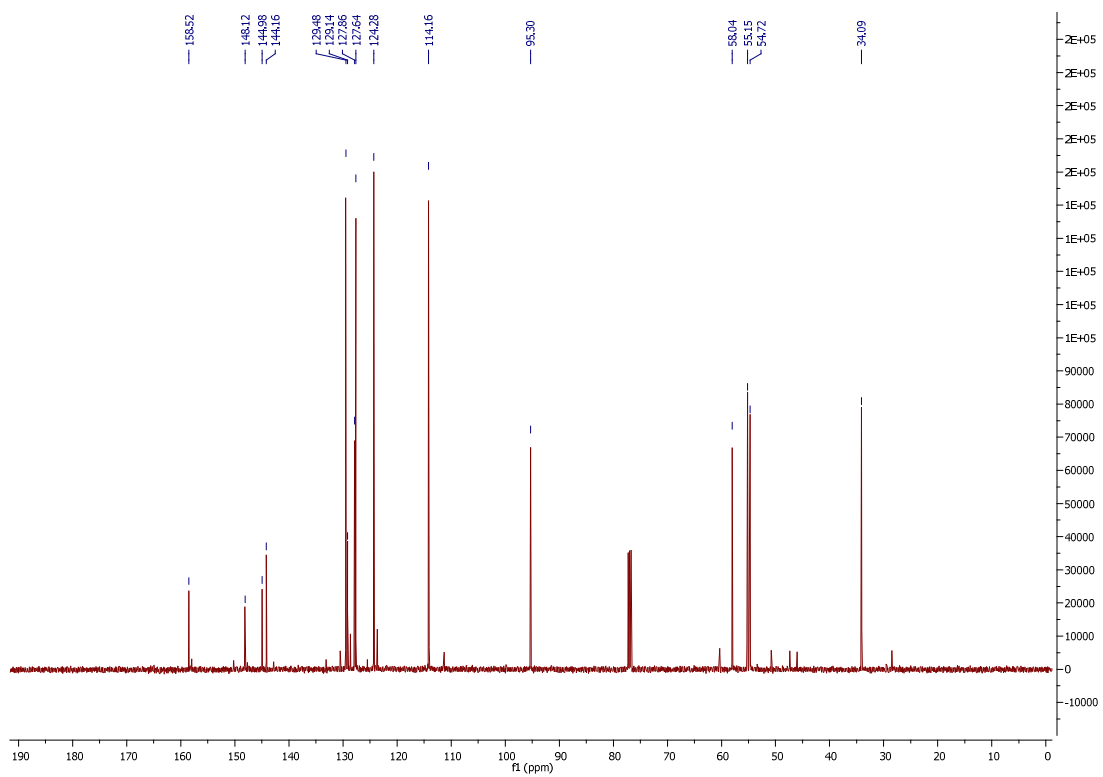

PHP077\_1\_Silica\_4.6X250\_MeOH\_5-30%\_6min  
PHP077\_1

3: Diode Array  
Range: 3.295e+1

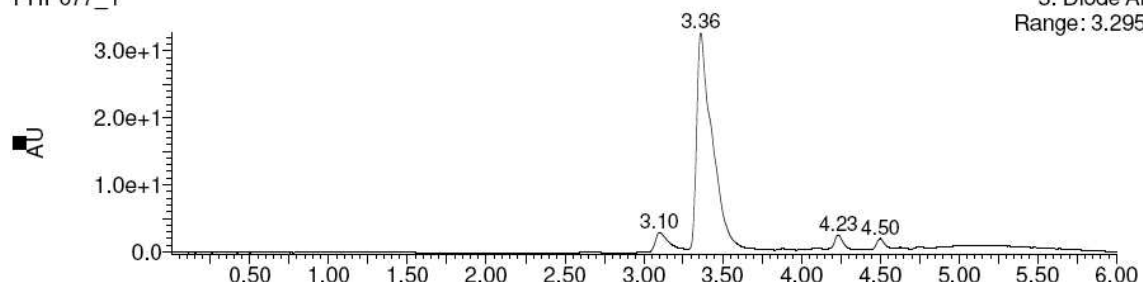

PHP077\_1

2: Scan ES-  
377.14  
3.81e6

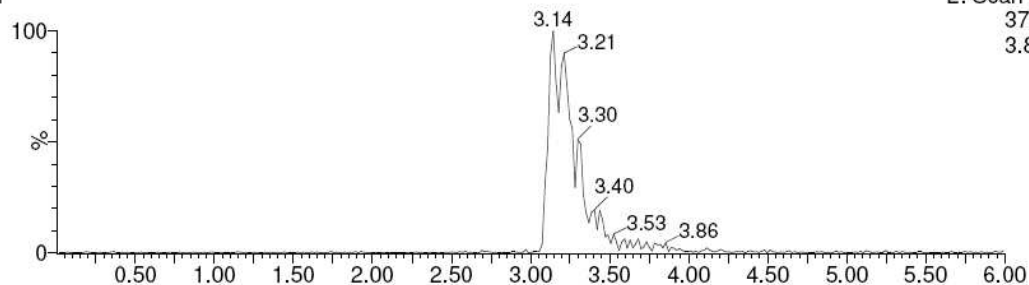

PHP077\_1\_Silica\_4.6X250\_MeOH\_5-30%\_6min  
PHP077\_1 183 (3.178)

2: Scan ES-  
2.41e6

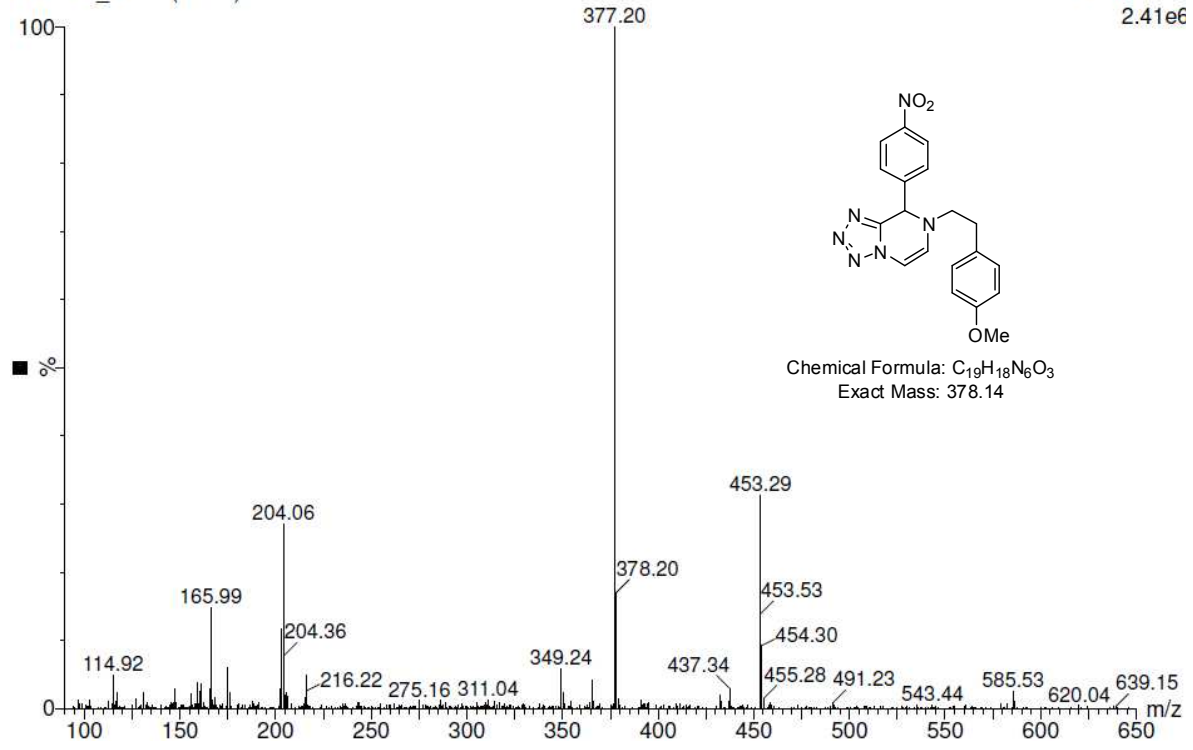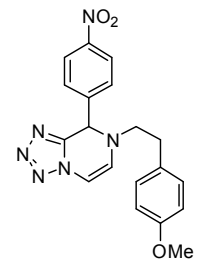

Chemical Formula: C<sub>19</sub>H<sub>18</sub>N<sub>6</sub>O<sub>3</sub>  
Exact Mass: 378.14

**8b: N-((1-(2,2-dimethoxyethyl)-1H-tetrazol-5-yl)(4-nitrophenyl)methyl)propan-1-amine.**

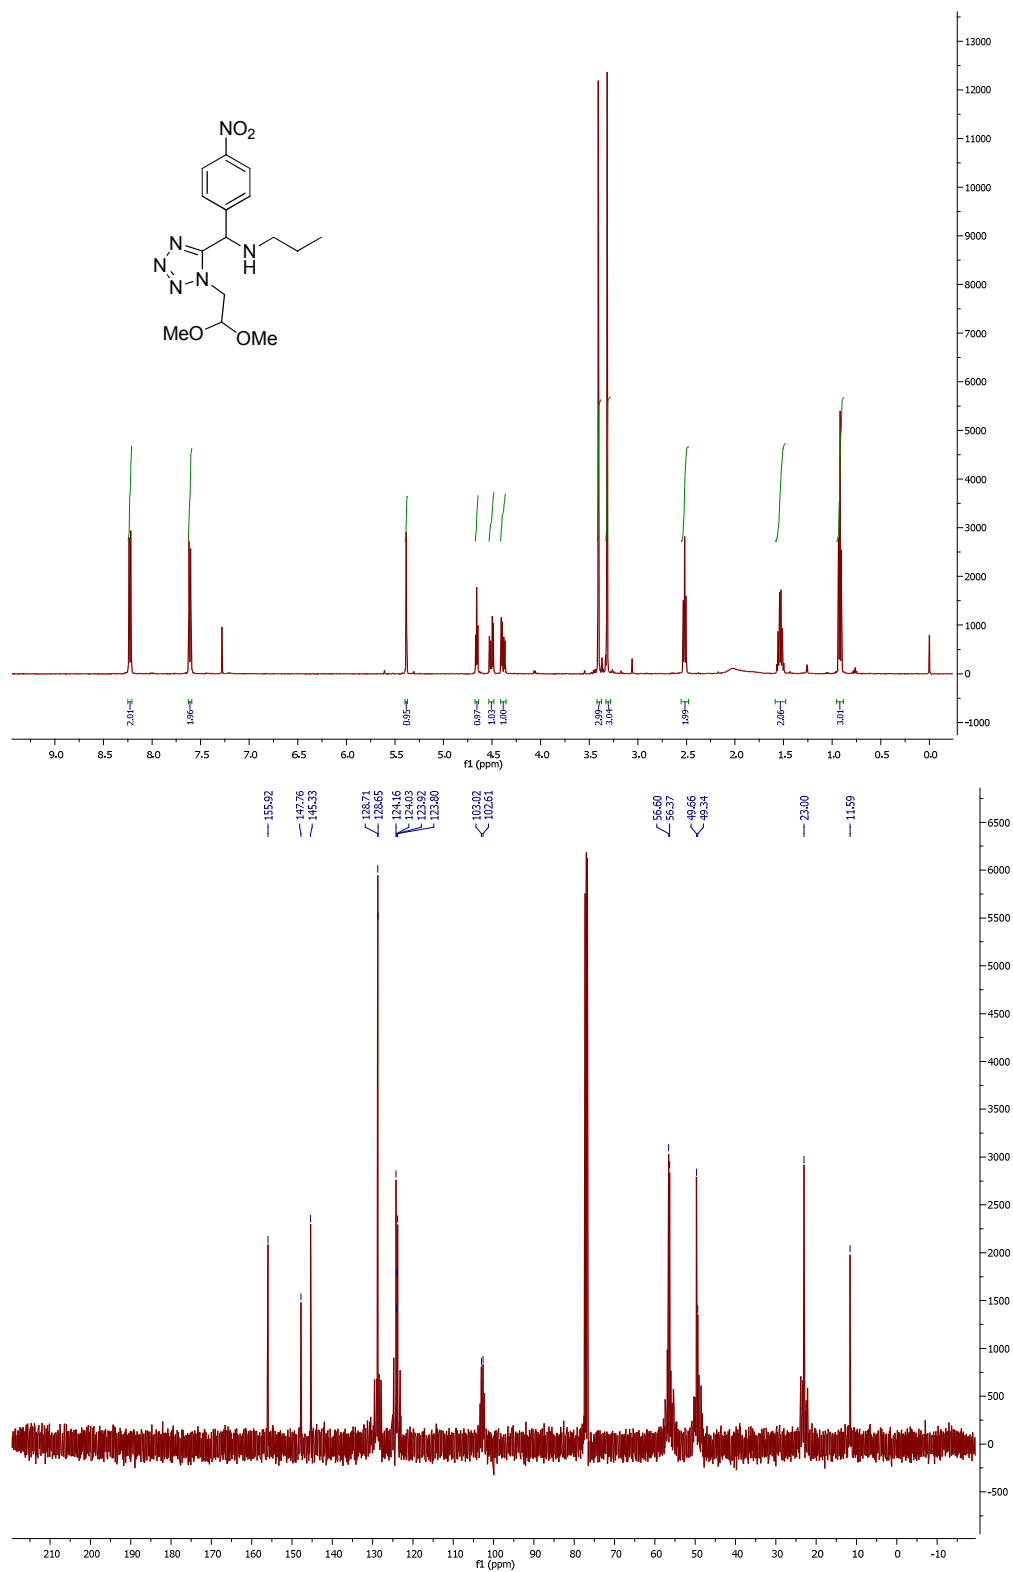

PHP233\_1\_Silica\_4.6X250\_MeOH\_5-30%\_6  
PHP233\_1

3: Diode Array  
Range: 1.866e+1

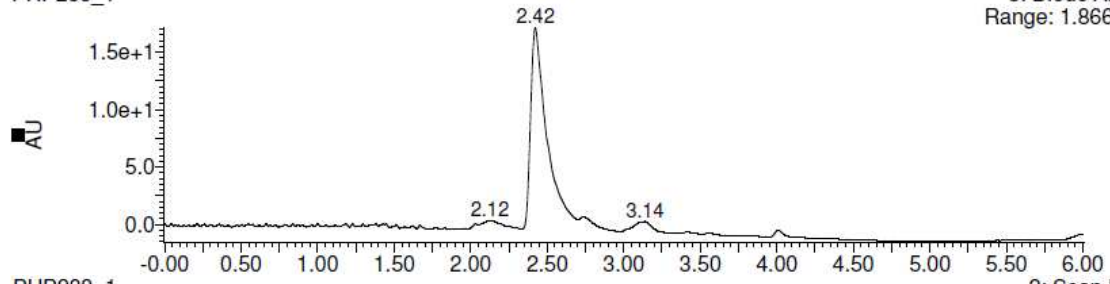

PHP233\_1

2: Scan ES-  
349  
6.55e6

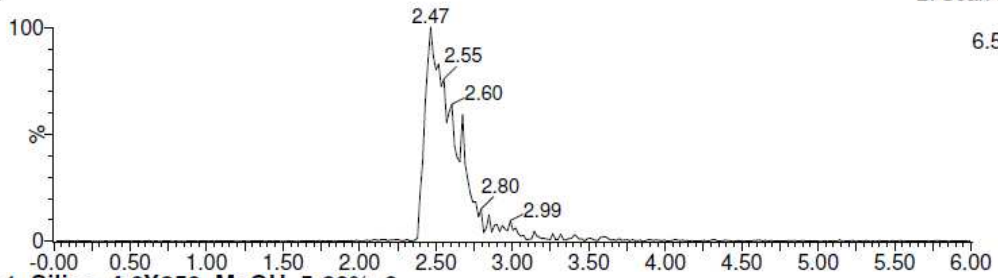

PHP233\_1\_Silica\_4.6X250\_MeOH\_5-30%\_6  
PHP233\_1 140 (2.431)

2: Scan ES-  
4.23e6

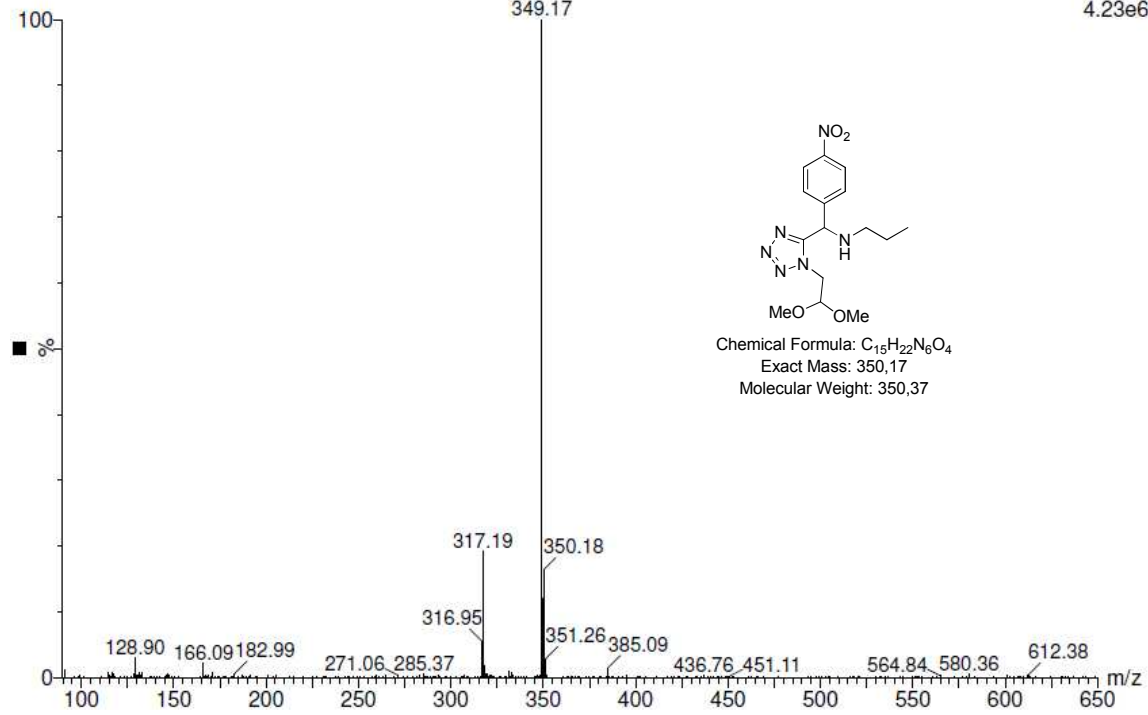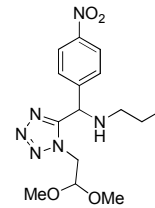

Chemical Formula: C<sub>15</sub>H<sub>22</sub>N<sub>6</sub>O<sub>4</sub>  
Exact Mass: 350.17  
Molecular Weight: 350.37

**2b: 8-(4-nitrophenyl)-7-propyl-7,8-dihydro-1,5-a-pyrazine.**

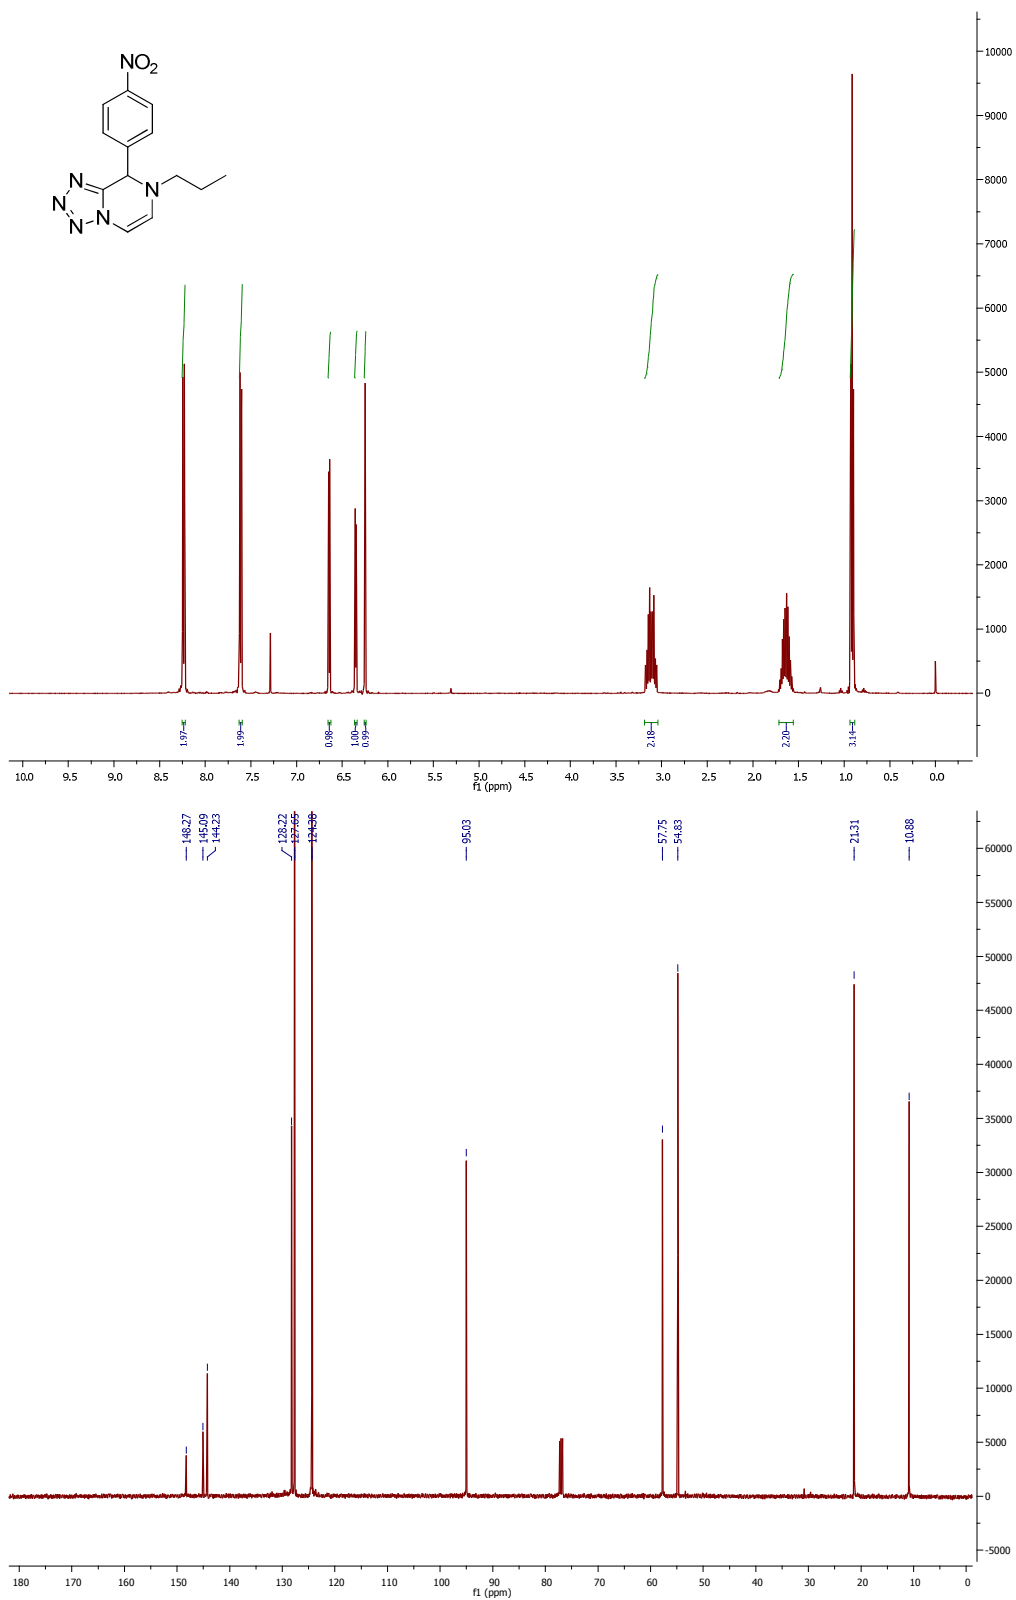

PHP246\_1\_Silica\_4.6X250\_MeOH\_5-30%\_6

PHP246\_1

3: Diode Array  
Range: 2.722e+1

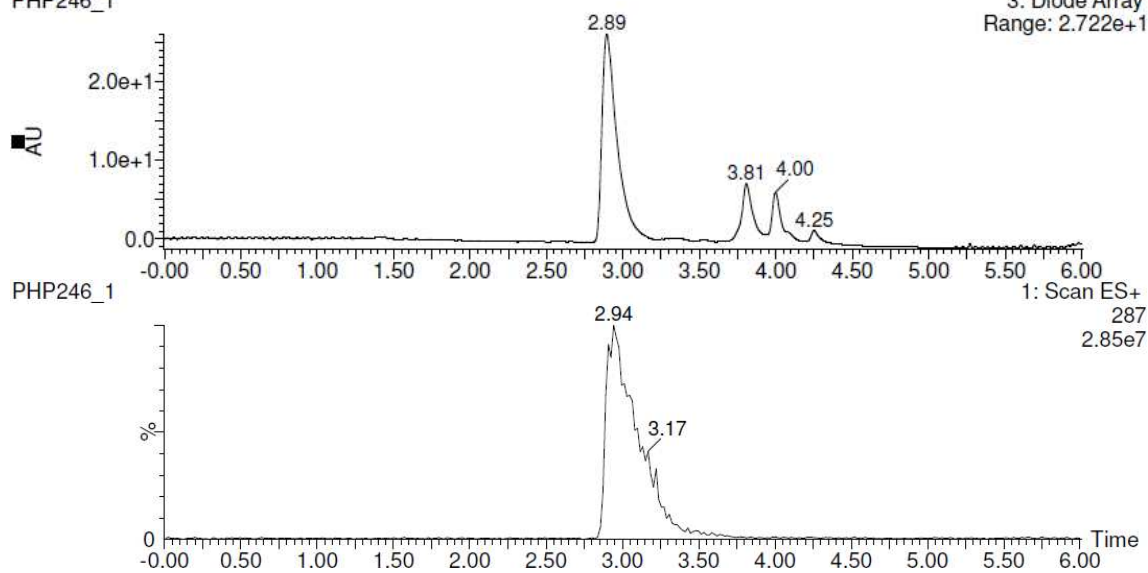

PHP246\_1

1: Scan ES+  
287  
2.85e7

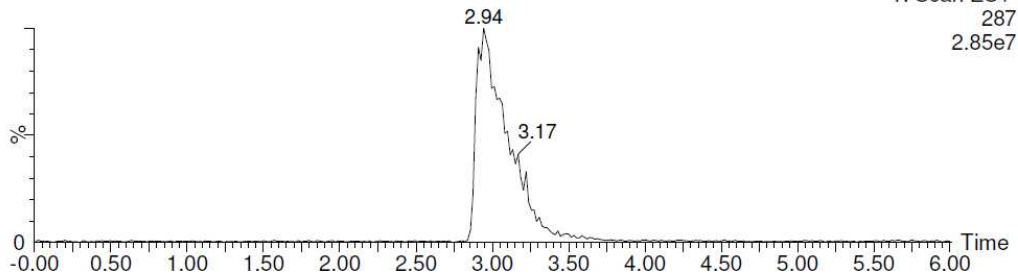

PHP246\_1\_Silica\_4.6X250\_MeOH\_5-30%\_6

PHP246\_1 168 (2.909)

1: Scan ES+  
2.59e7

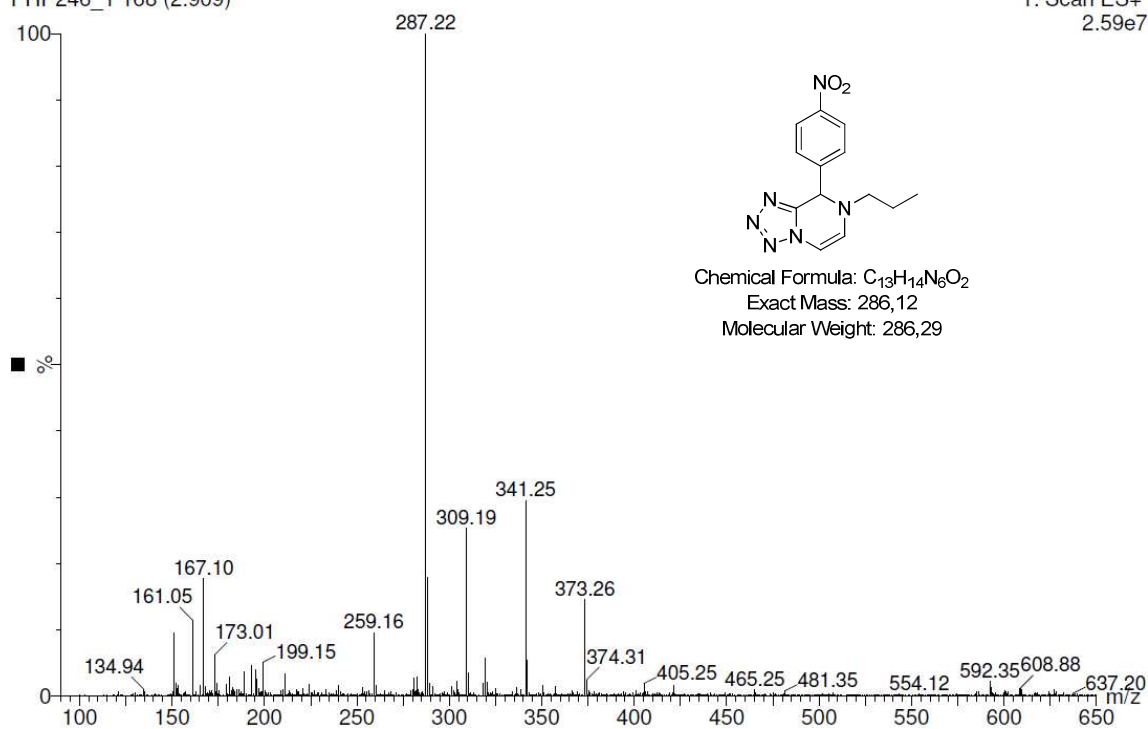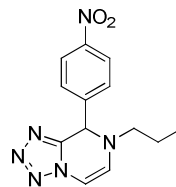

Chemical Formula: C<sub>13</sub>H<sub>14</sub>N<sub>6</sub>O<sub>2</sub>  
Exact Mass: 286,12  
Molecular Weight: 286,29



**8c: N-((1-(2,2-dimethoxyethyl)-1H-tetrazol-5-yl)(4-methoxyphenyl)methyl)propan-1-amine.**

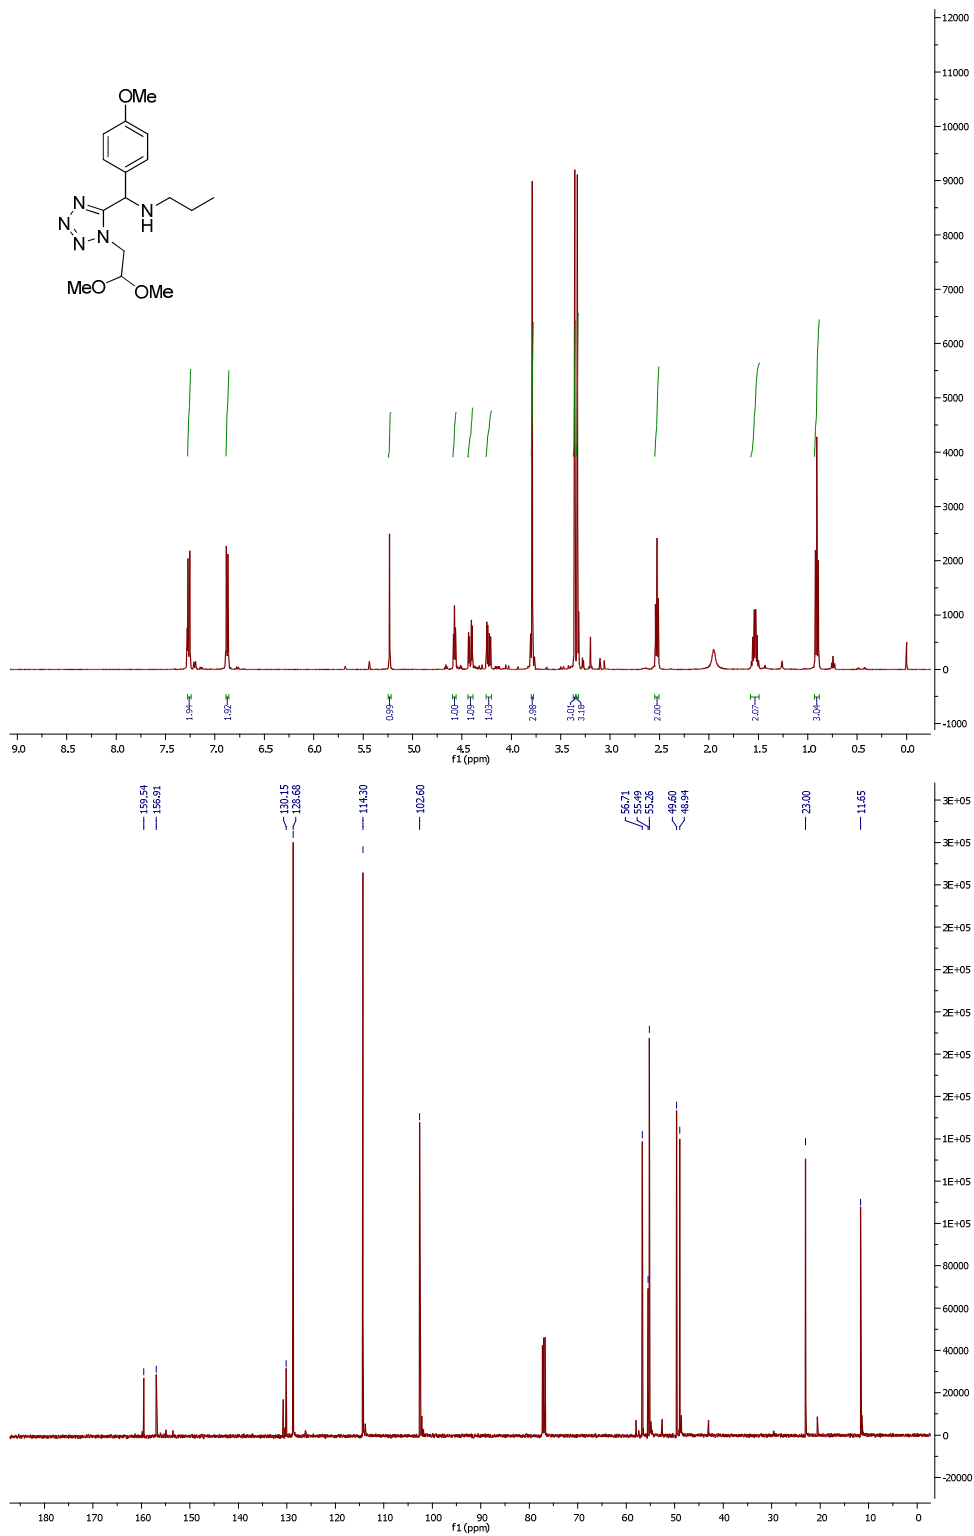

PHP193\_1\_Silica\_4.6X250\_MeOH\_5-30%\_6

PHP193\_1

3: Diode Array  
Range: 5.617

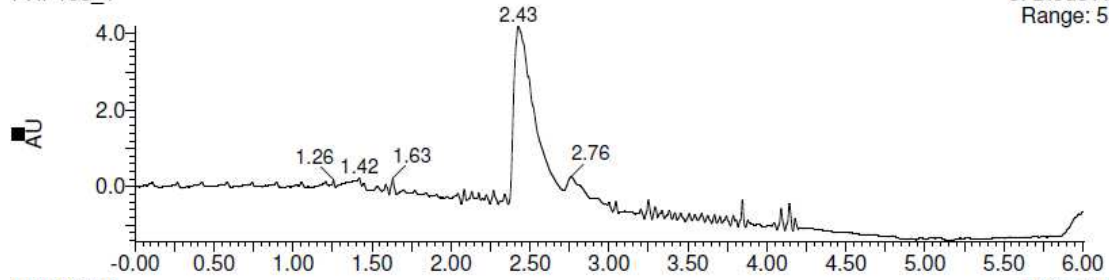

PHP193\_1

1: Scan ES+  
336  
4.15e7

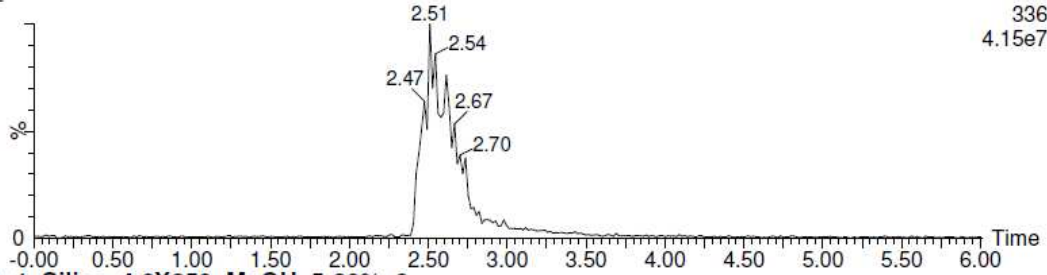

PHP193\_1\_Silica\_4.6X250\_MeOH\_5-30%\_6

PHP193\_1 147 (2.544)

1: Scan ES+  
8.10e7

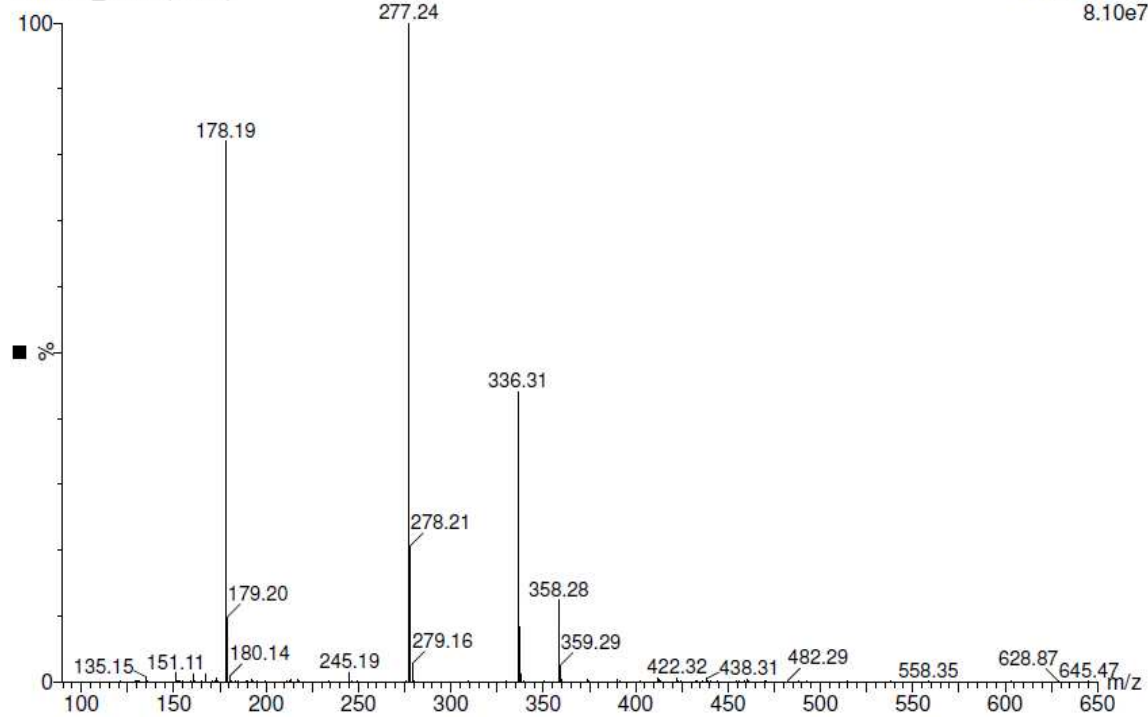

**2c: 8-(4-methoxyphenyl)-7-propyl-7,8-dihydro-1,5-benzodiazepine.**

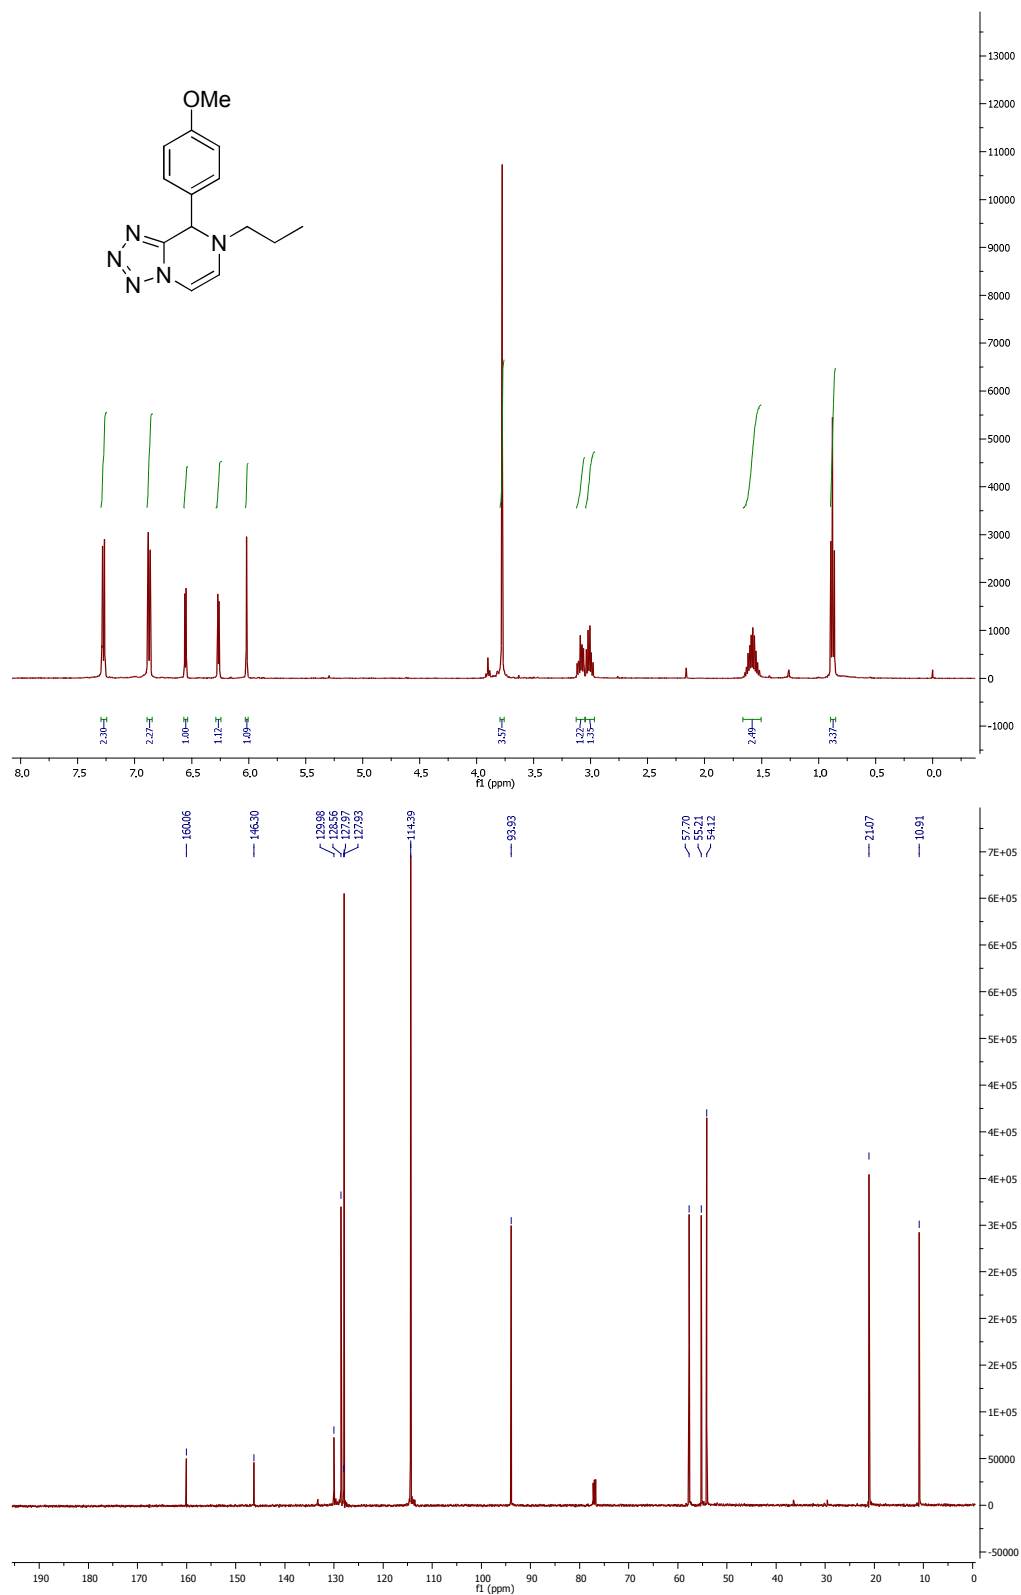

PHP196\_1\_silica\_4.6x250\_sol1\_5-30%\_6min

PHP196\_1R

3: Diode Array  
Range: 2.855e+1

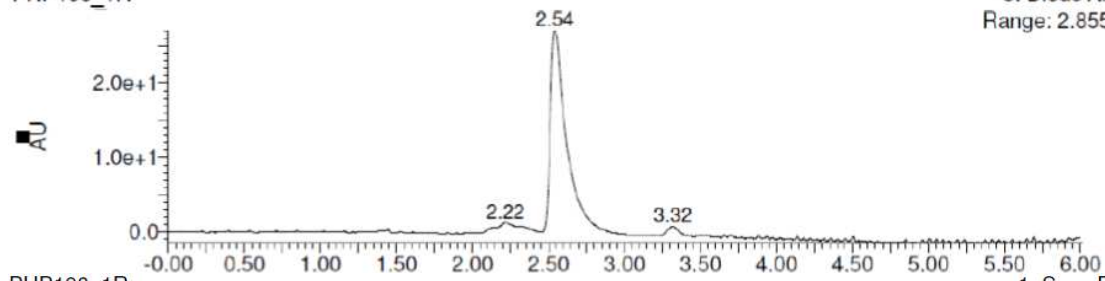

PHP196\_1R

1: Scan ES+  
272  
9.81e5

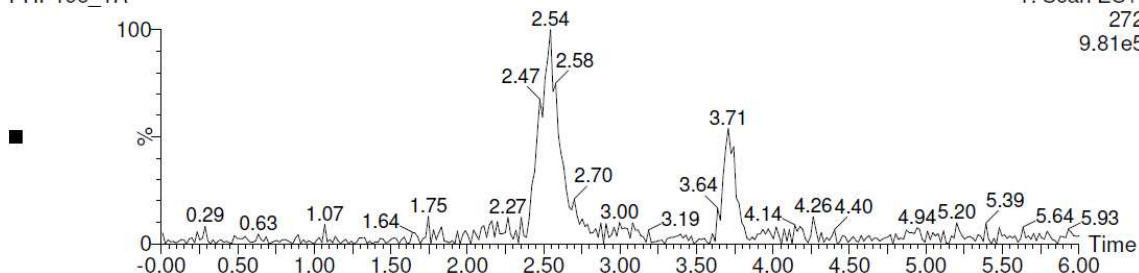

PHP196\_1\_silica\_4.6x250\_sol1\_5-30%\_6min

PHP196\_1R 147 (2.544)

1: Scan ES+  
7.35e6

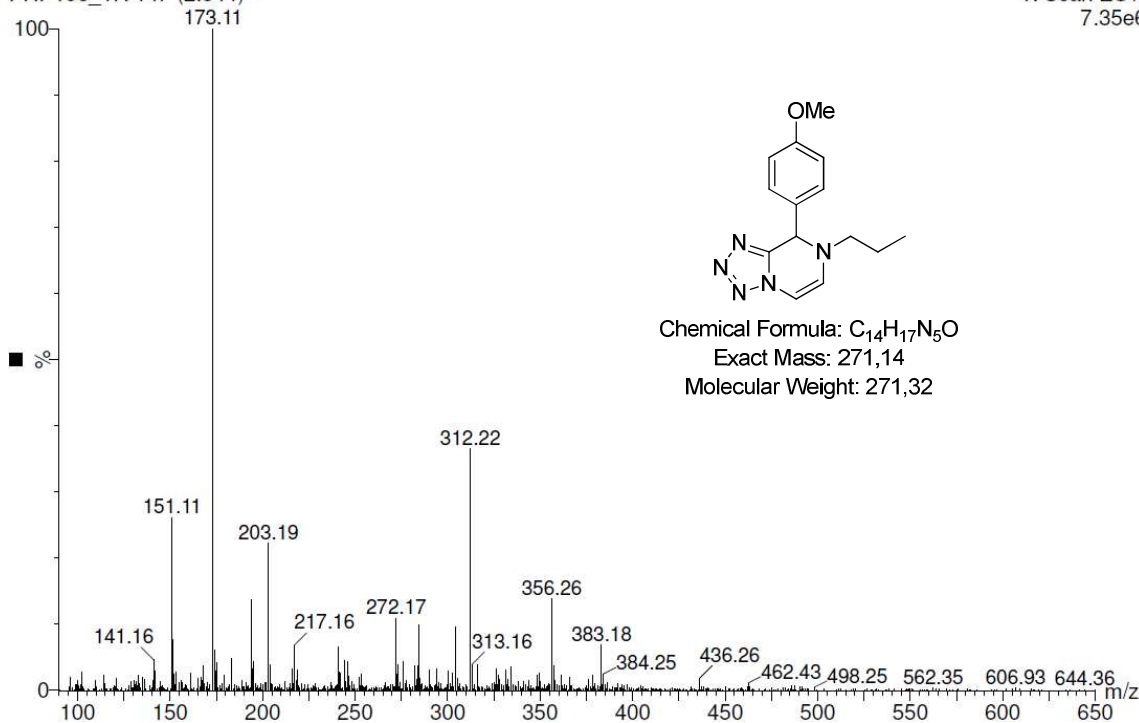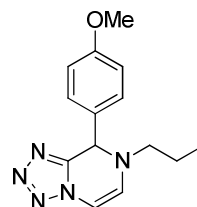

Chemical Formula: C<sub>14</sub>H<sub>17</sub>N<sub>5</sub>O

Exact Mass: 271,14

Molecular Weight: 271,32

**8d: N-(1-(1-(2,2-dimethoxyethyl)-1H-tetrazol-5-yl)cyclohexyl)aniline.**

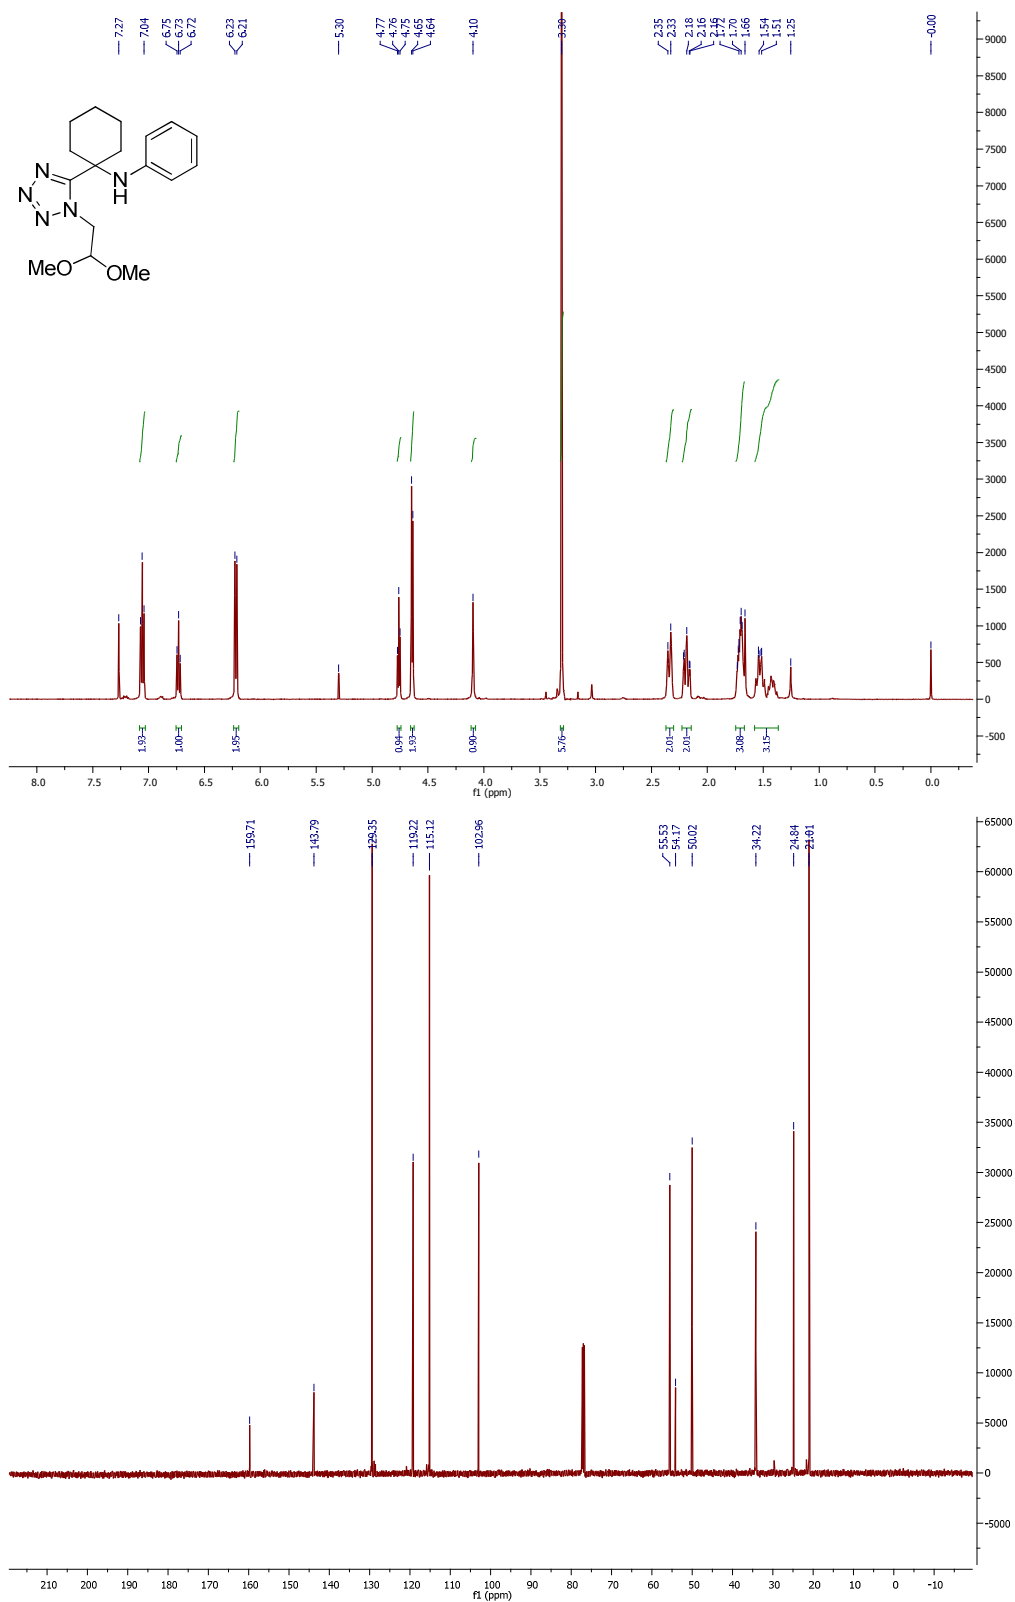

PHP138\_1\_Silica\_4.6X250\_MeOH\_5-30%\_6

PHP138\_1

3: Diode Array  
Range: 9.455

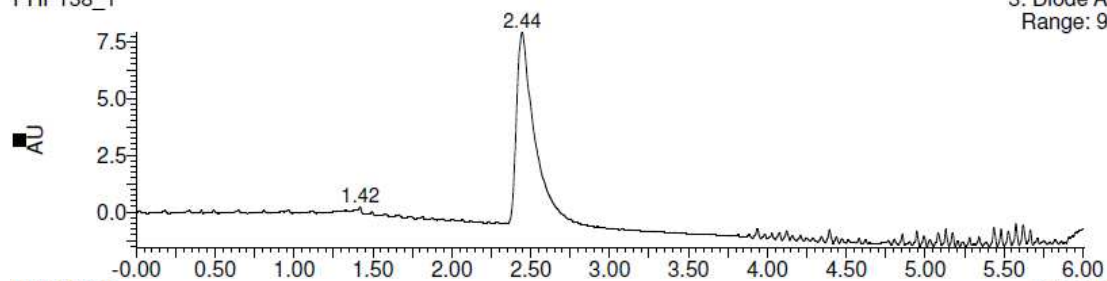

PHP138\_1

2: Scan ES-  
330  
2.69e6

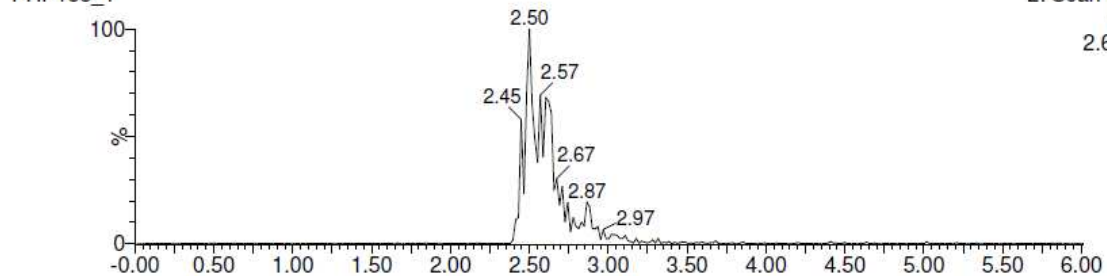

PHP138\_1\_Silica\_4.6X250\_MeOH\_5-30%\_6

PHP138\_1 141 (2.448)

2: Scan ES-  
1.55e6

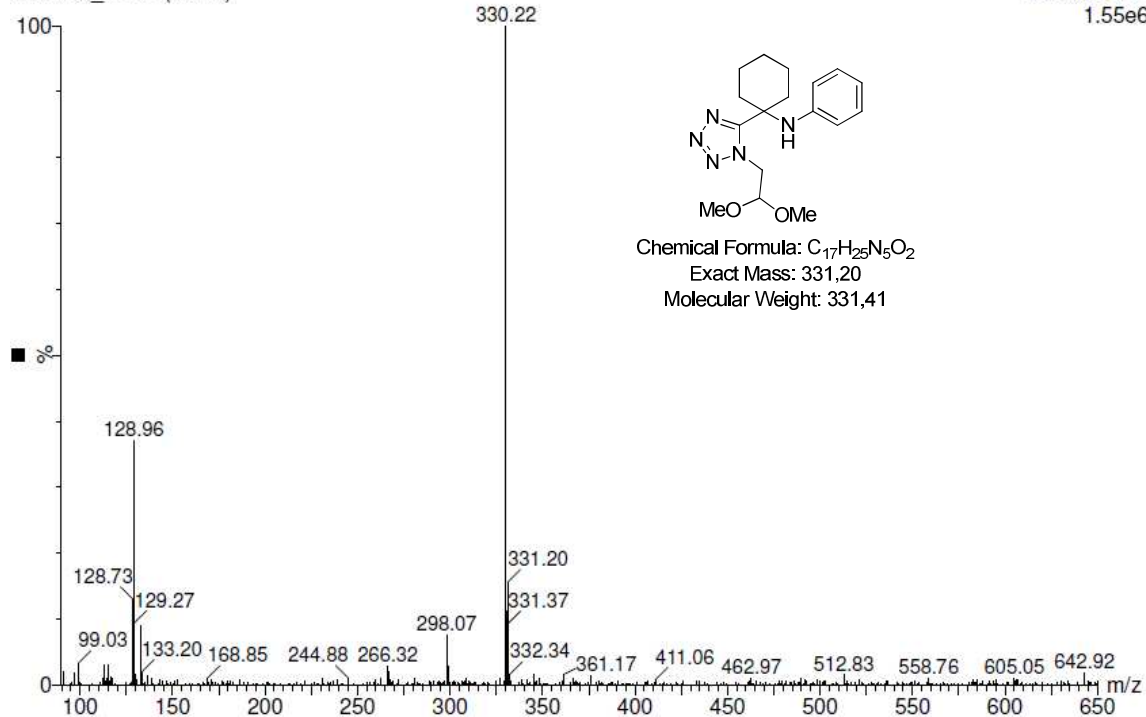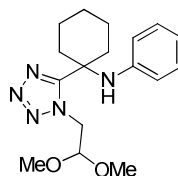

Chemical Formula: C<sub>17</sub>H<sub>25</sub>N<sub>5</sub>O<sub>2</sub>  
Exact Mass: 331.20  
Molecular Weight: 331.41

**2d: 7'-phenyl-7'H-spiro[cyclohexane-1,8'-tetrazolo[1,5-a]pyrazine].**

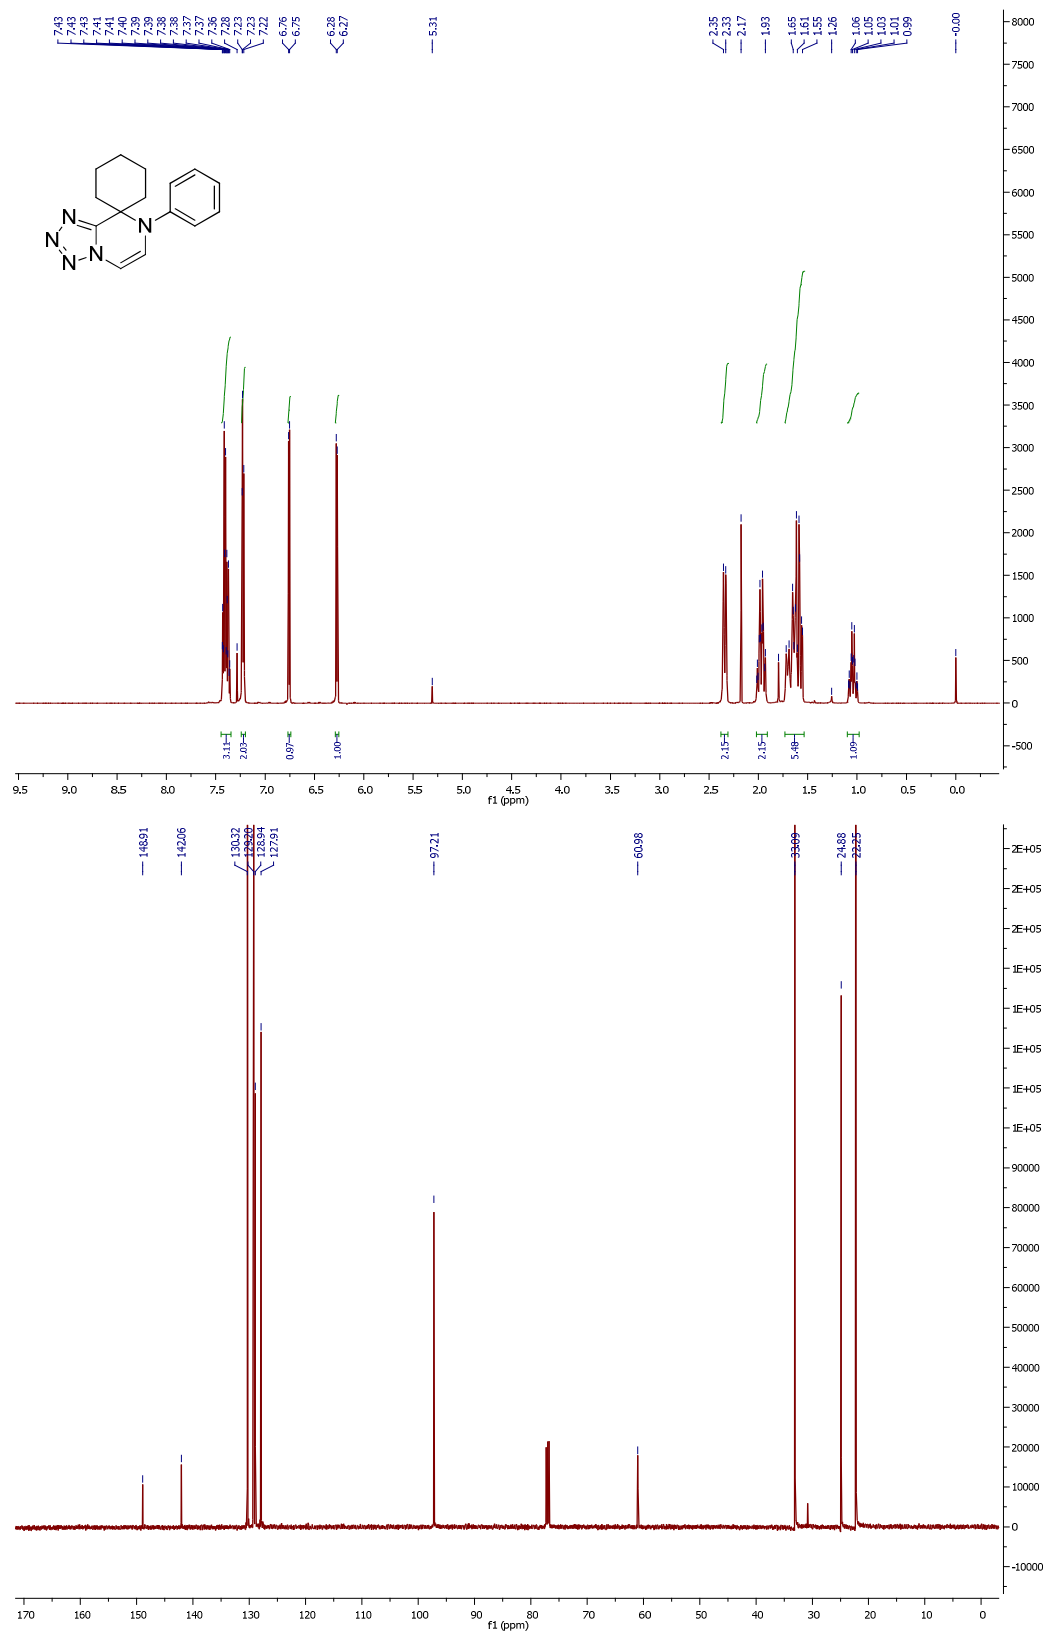

PHP142\_1\_Silica\_4.6X250\_MeOH\_5-30%\_6

PHP142\_1

3: Diode Array  
Range: 5.336

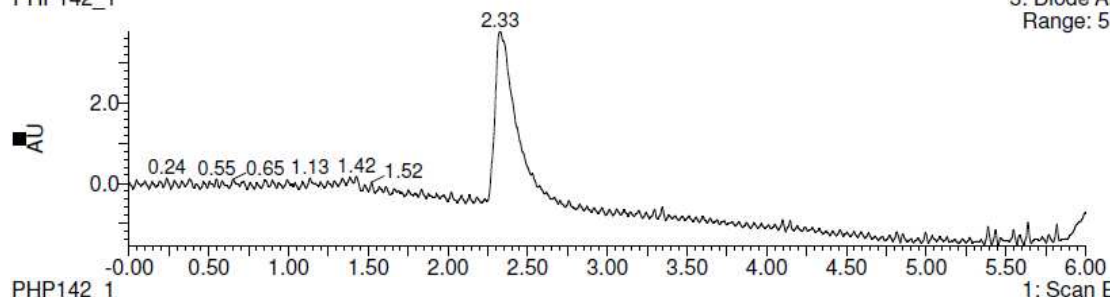

PHP142\_1

1: Scan ES+  
268  
5.57e7

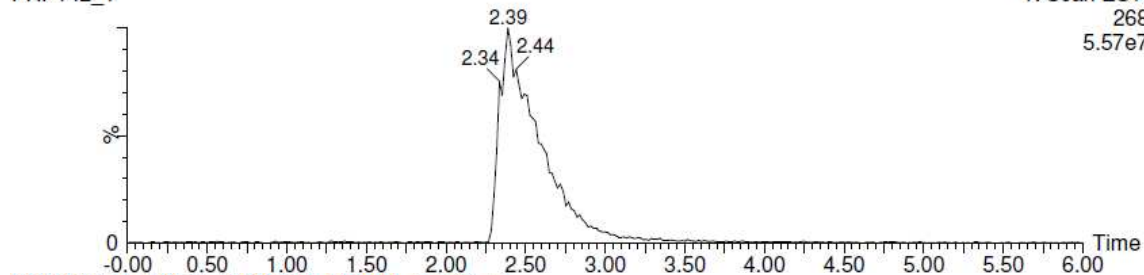

PHP142\_1\_Silica\_4.6X250\_MeOH\_5-30%\_6

PHP142\_1 135 (2.336)

1: Scan ES+  
4.18e7

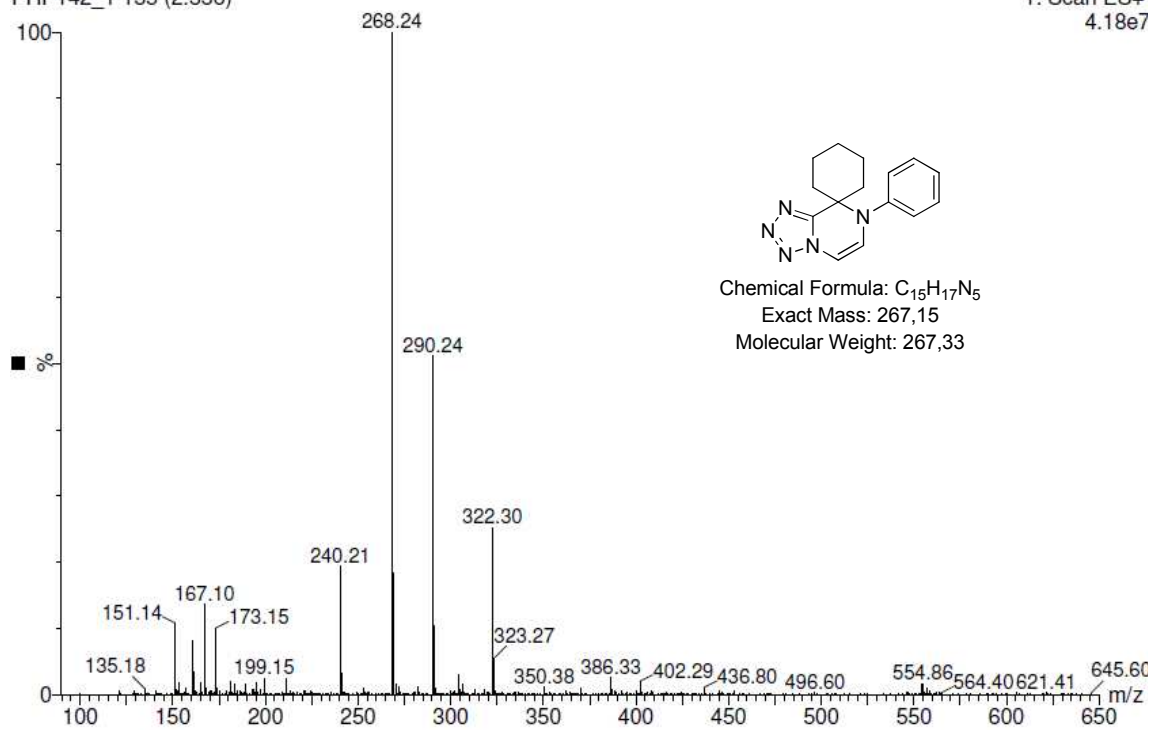



**8e: N-(1-(1-(2,2-dimethoxyethyl)-1H-tetrazol-5-yl)cyclohexyl)-2,4-dimethylaniline.**

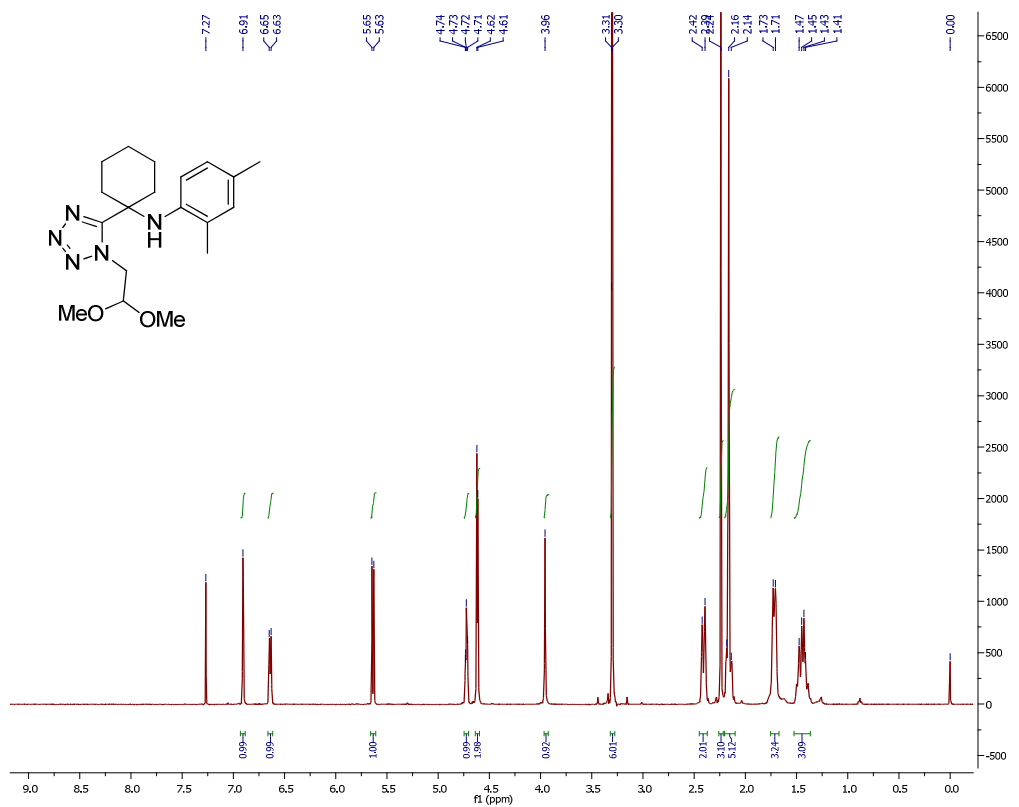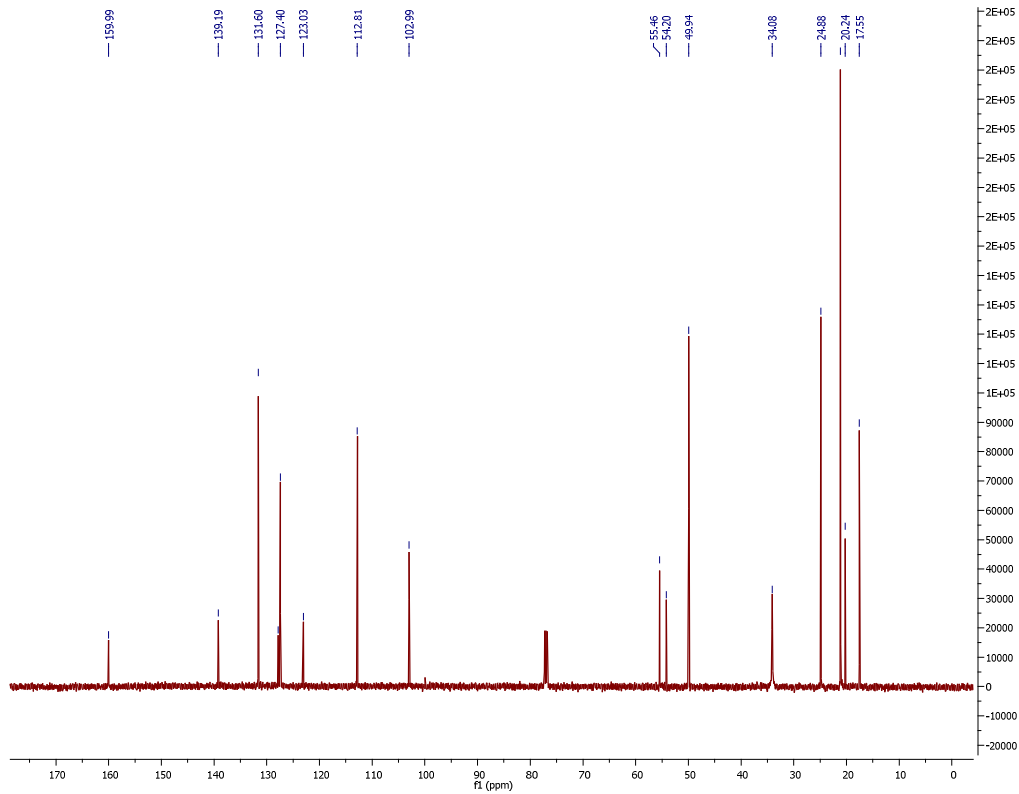

PHP140\_1\_Silica\_4.6X250\_MeOH\_5-30%\_6

PHP140\_1

3: Diode Array  
Range: 5.807

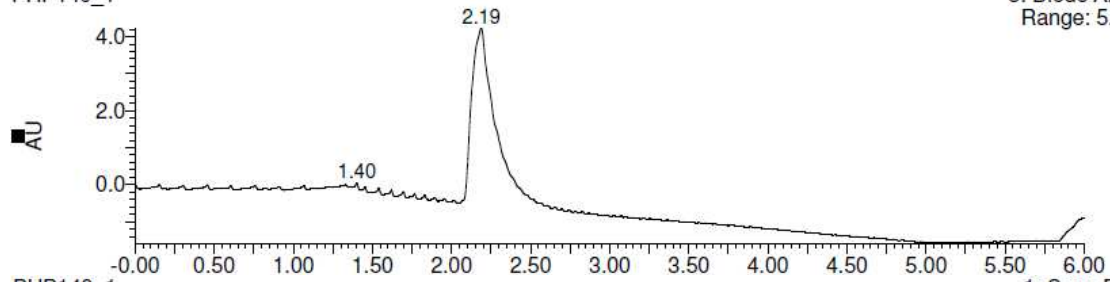

PHP140\_1

1: Scan ES+  
360  
5.90e5

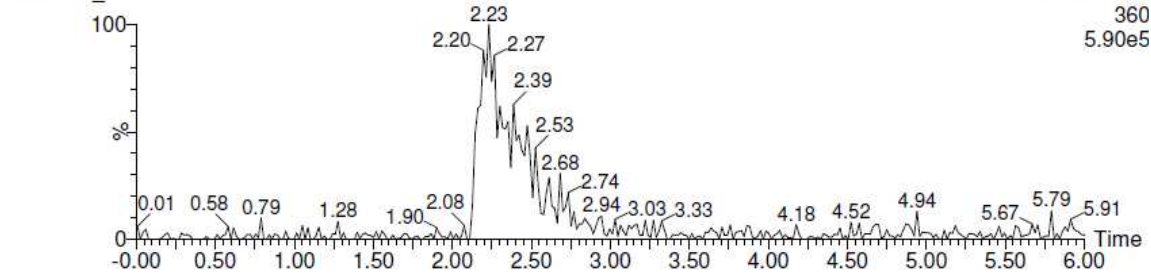

PHP140\_1 128 (2.223)

2: Scan ES-  
1.22e5

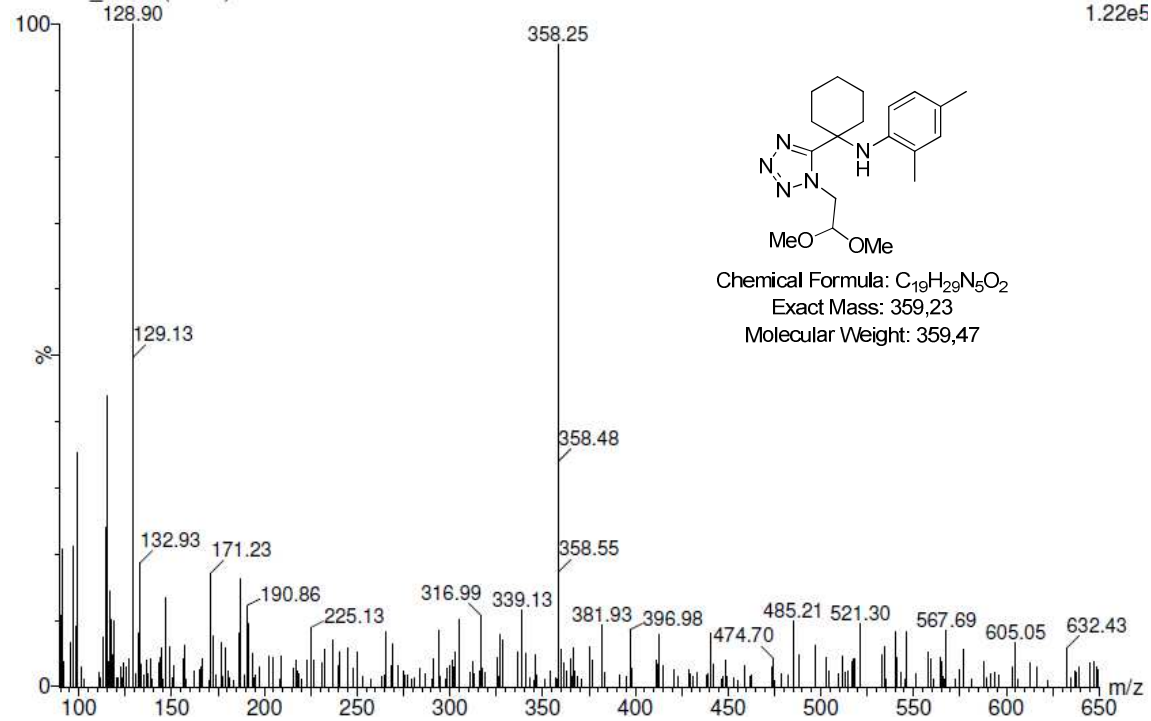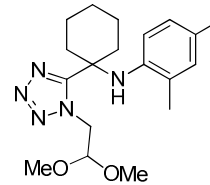

Chemical Formula: C<sub>19</sub>H<sub>29</sub>N<sub>5</sub>O<sub>2</sub>  
Exact Mass: 359,23  
Molecular Weight: 359,47

**2e: 7'-(2,4-dimethylphenyl)-7'H-spiro[cyclohexane-1,8'-tetrazolo[1,5-a]pyrazine].**

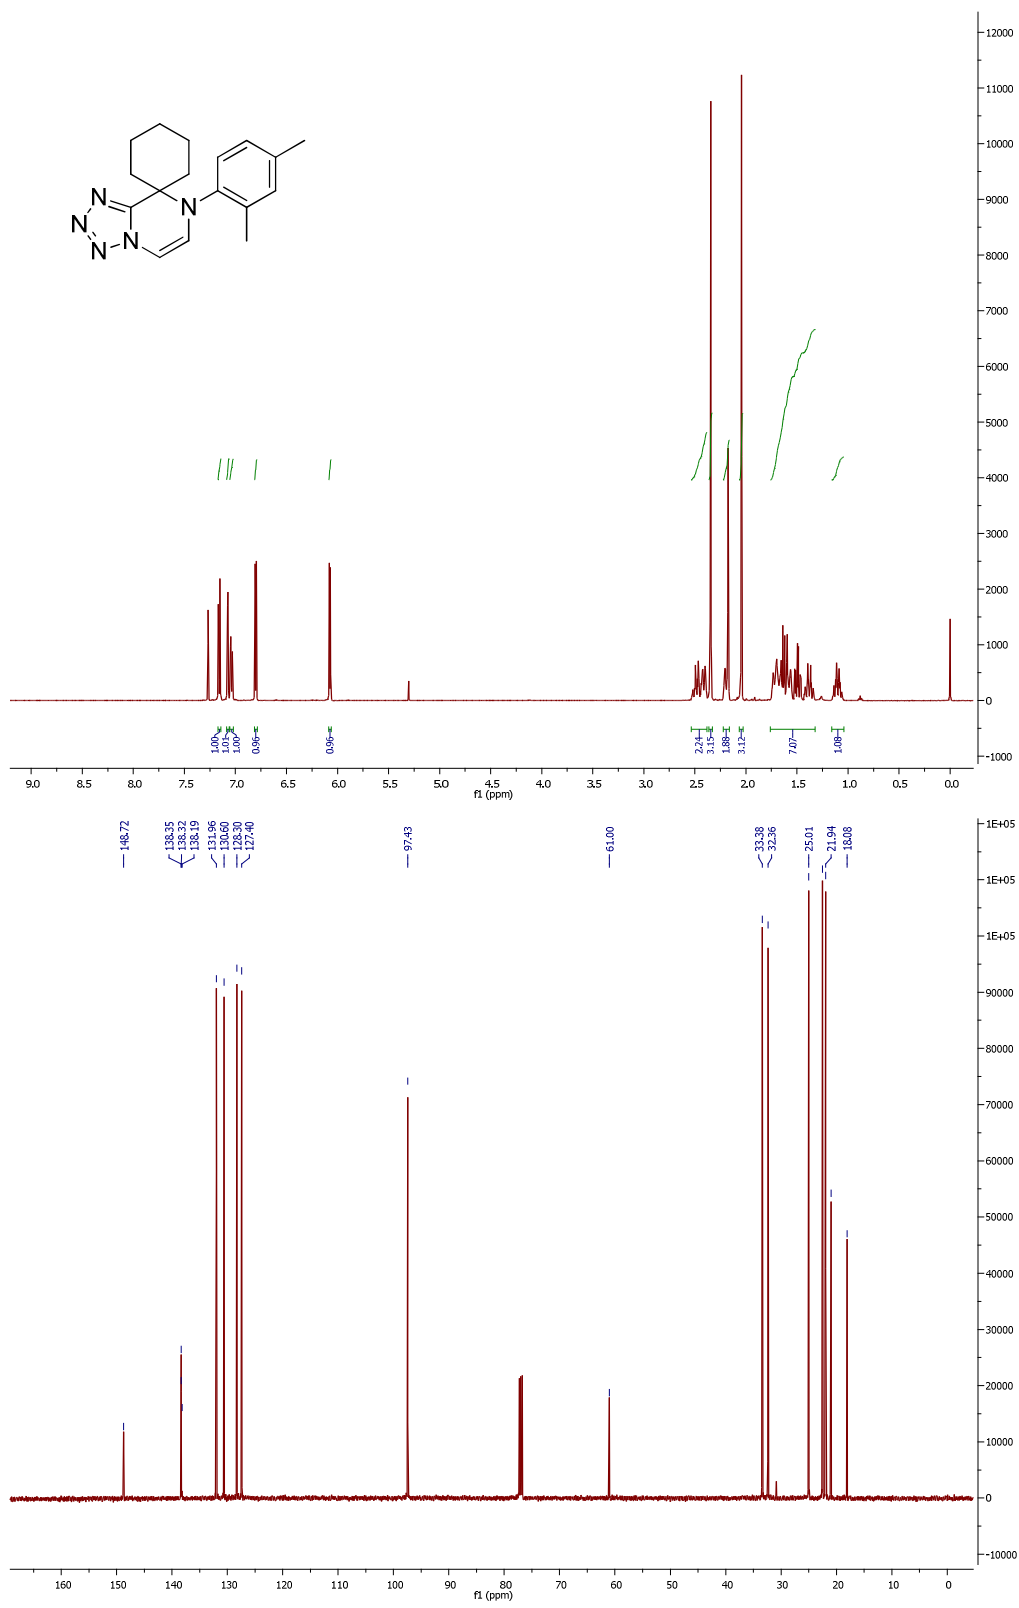

PHP148\_1\_Silica\_4.6X250\_MeOH\_5-30%\_6

PHP148\_1

3: Diode Array  
Range: 6.66

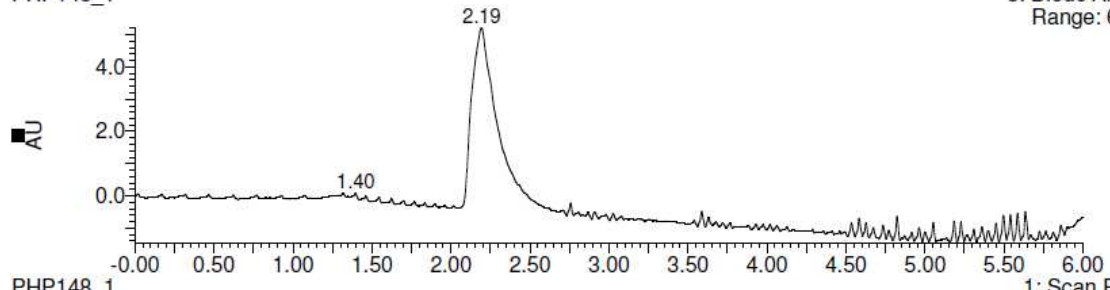

PHP148\_1

1: Scan ES+  
296  
4.00e7

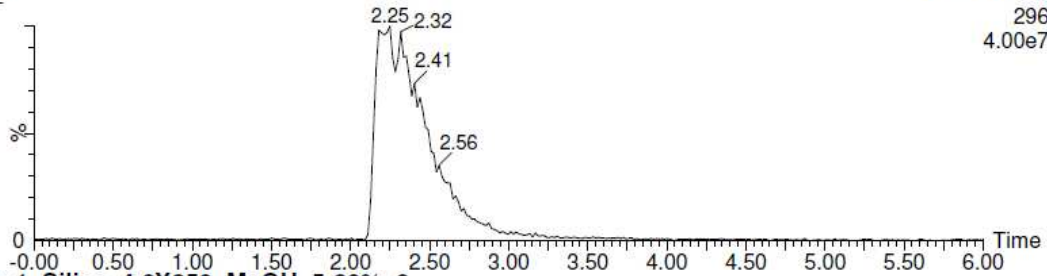

PHP148\_1\_Silica\_4.6X250\_MeOH\_5-30%\_6

PHP148\_1 127 (2.197)

1: Scan ES+  
3.88e7

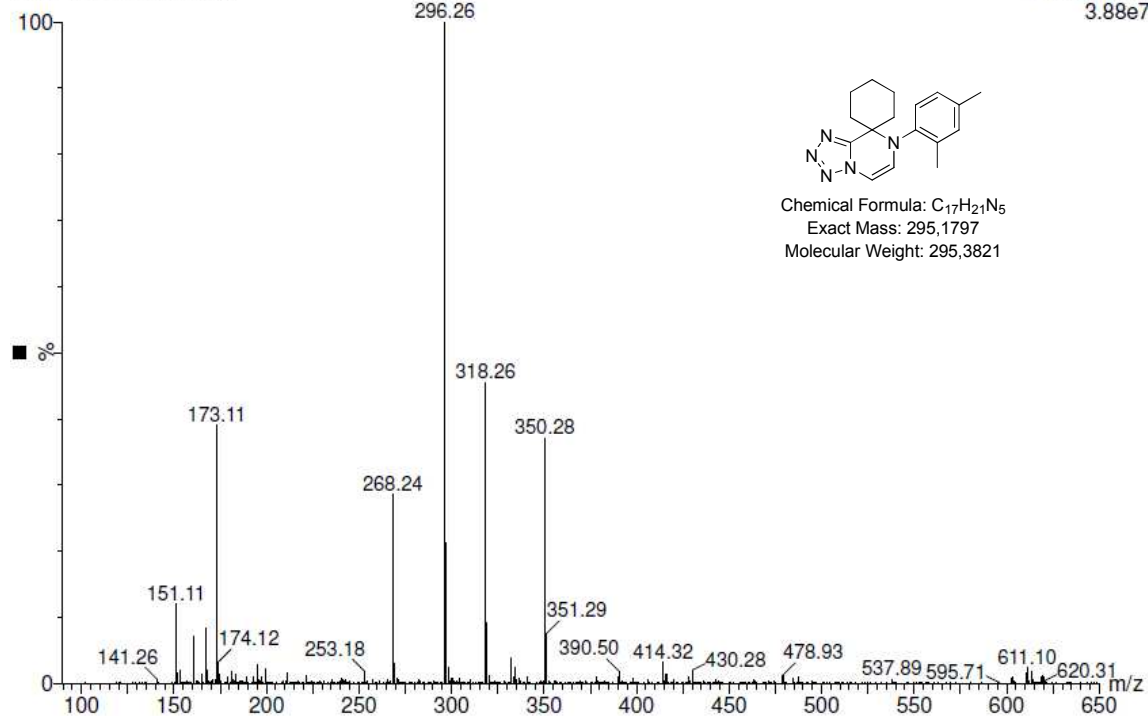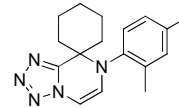

Chemical Formula: C<sub>17</sub>H<sub>21</sub>N<sub>5</sub>  
Exact Mass: 295,1797  
Molecular Weight: 295,3821

8f: N-(1-(1-(2,2-dimethoxyethyl)-1H-tetrazol-5-yl)cyclohexyl)-2,6-dimethylaniline.

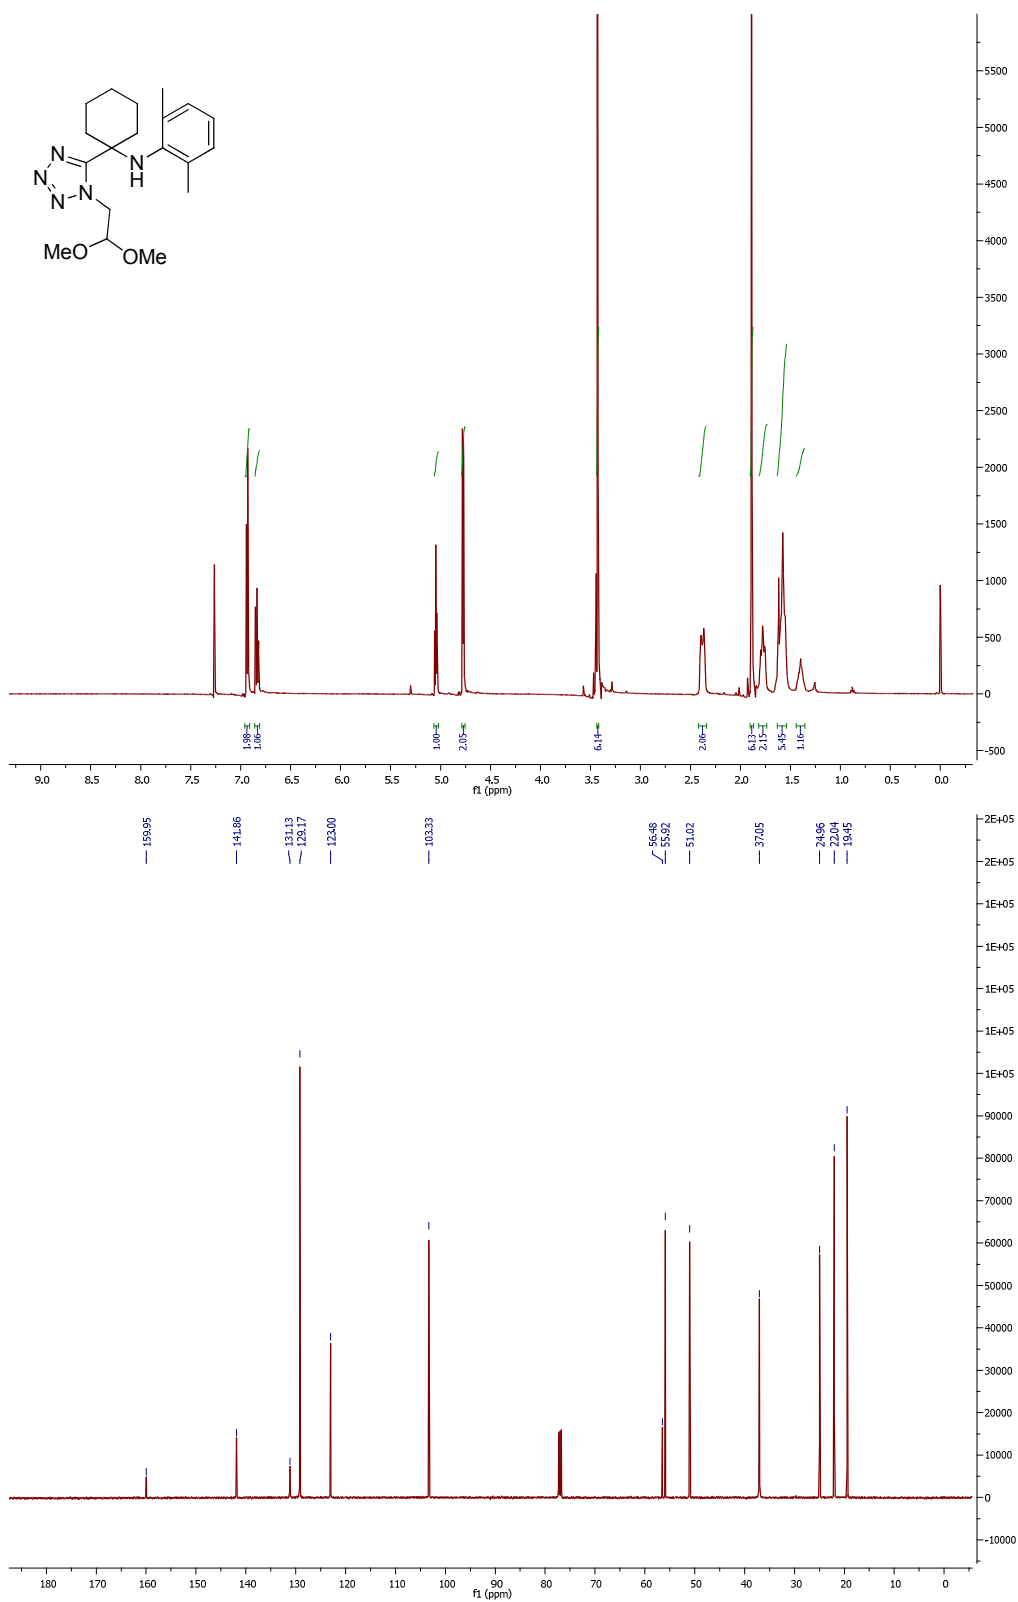

PHP143\_1\_Silica\_4.6X250\_MeOH\_5-30%\_6

PHP143\_1

3: Diode Array  
Range: 5.815

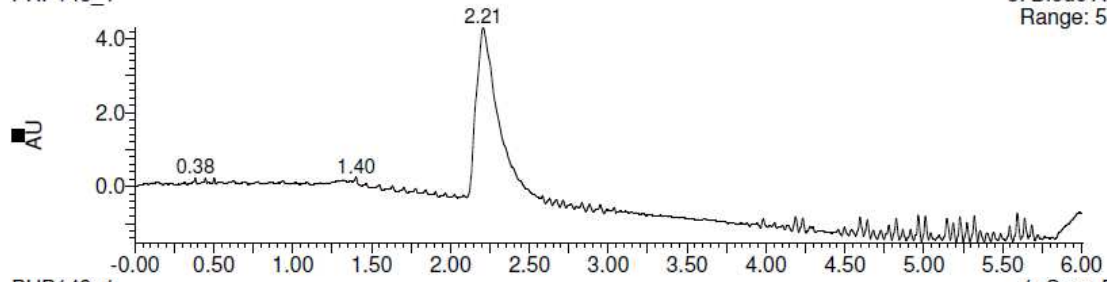

PHP143\_1

1: Scan ES+  
360  
9.83e5

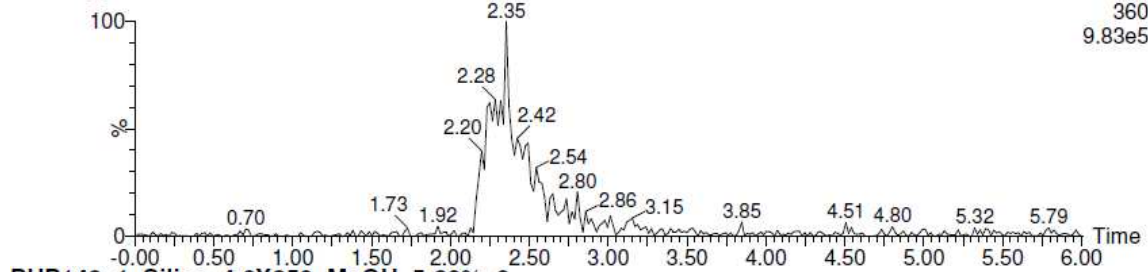

PHP143\_1\_Silica\_4.6X250\_MeOH\_5-30%\_6

PHP143\_1 125 (2.162)

1: Scan ES+  
3.13e6

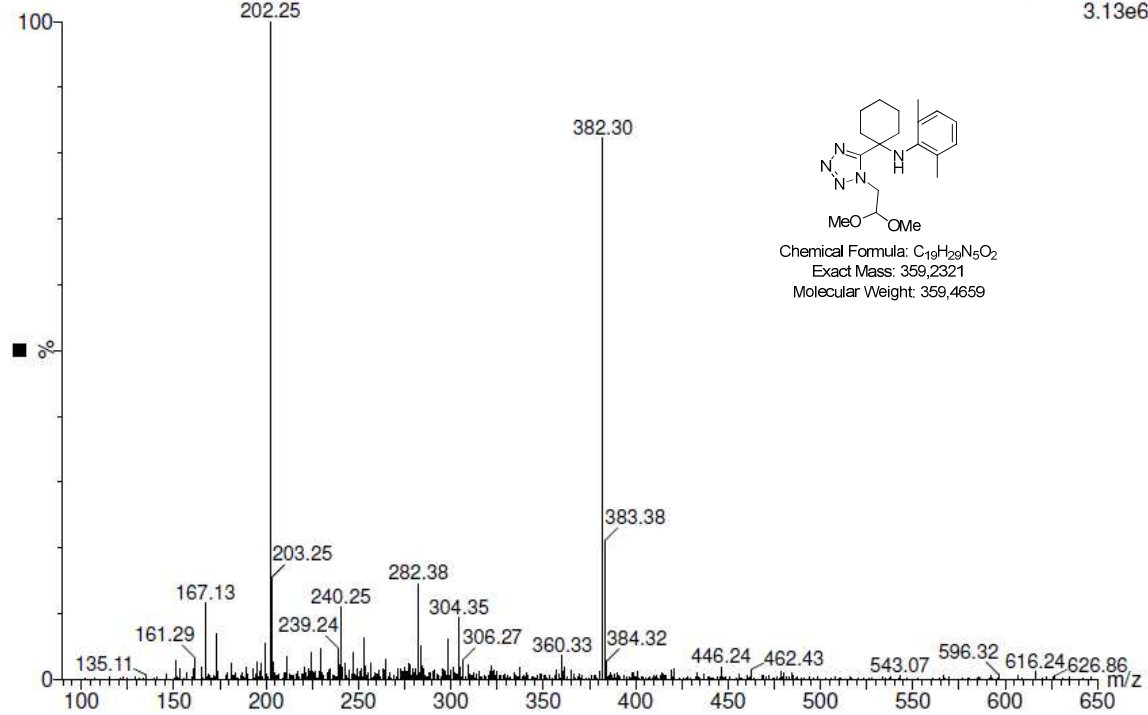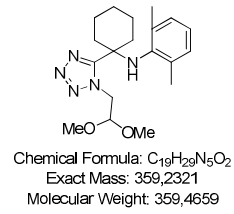

2f: 7'-(2,6-dimethylphenyl)-7'H-spiro[cyclohexane-1,8'-tetrazolo[1,5-a]pyrazine].

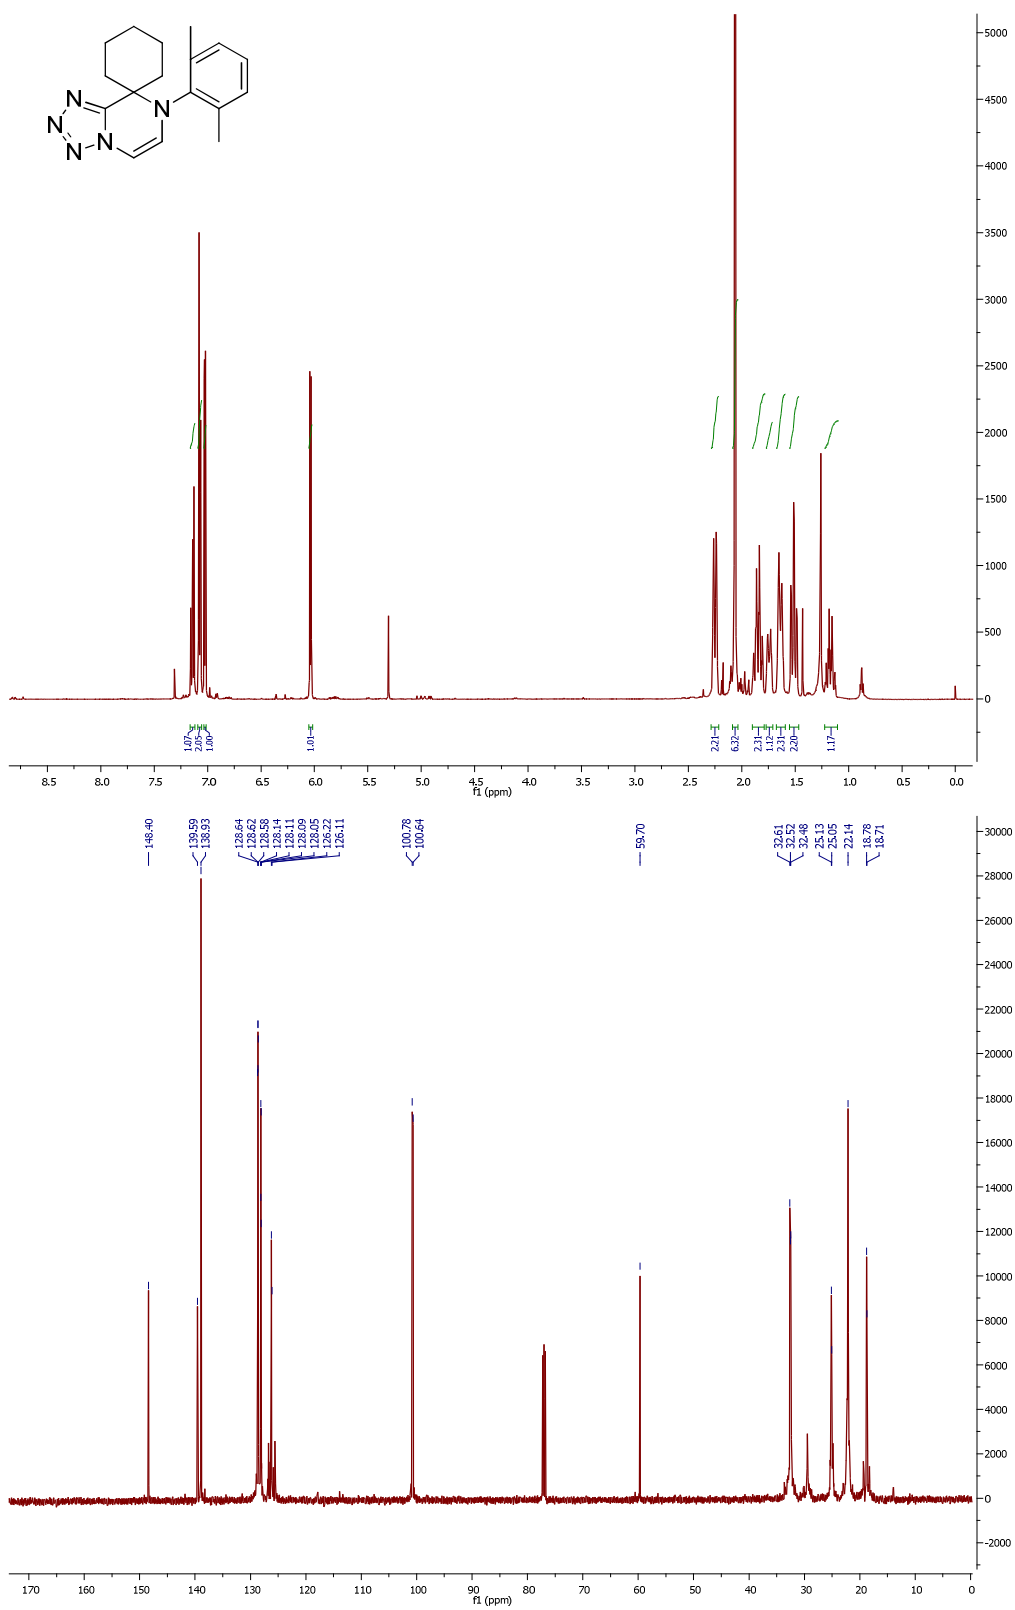

PHP150\_1\_Silica\_4.6X250\_MeOH\_5-30%\_6  
PHP150\_1

3: Diode Array  
Range: 1.546e+1

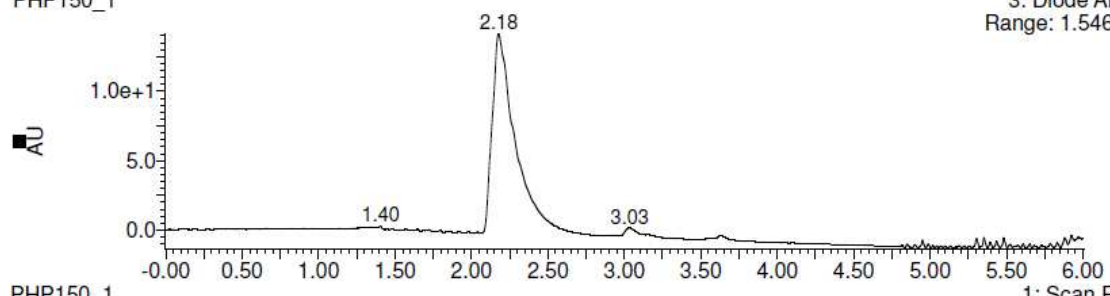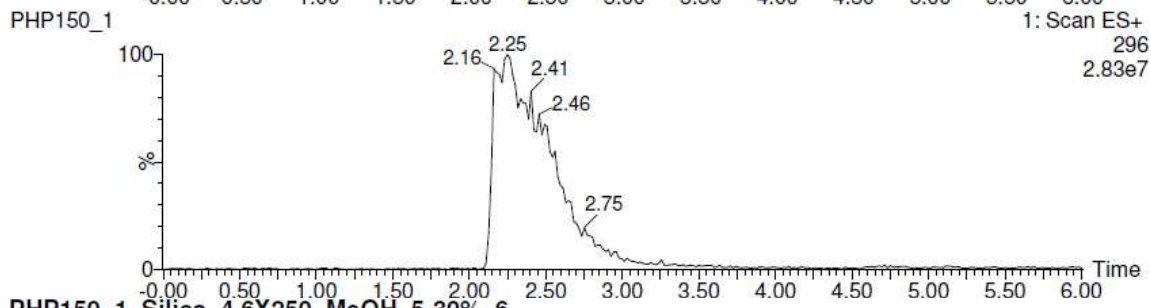

PHP150\_1\_Silica\_4.6X250\_MeOH\_5-30%\_6  
PHP150\_1 126 (2.179)

1: Scan ES+  
2.59e7

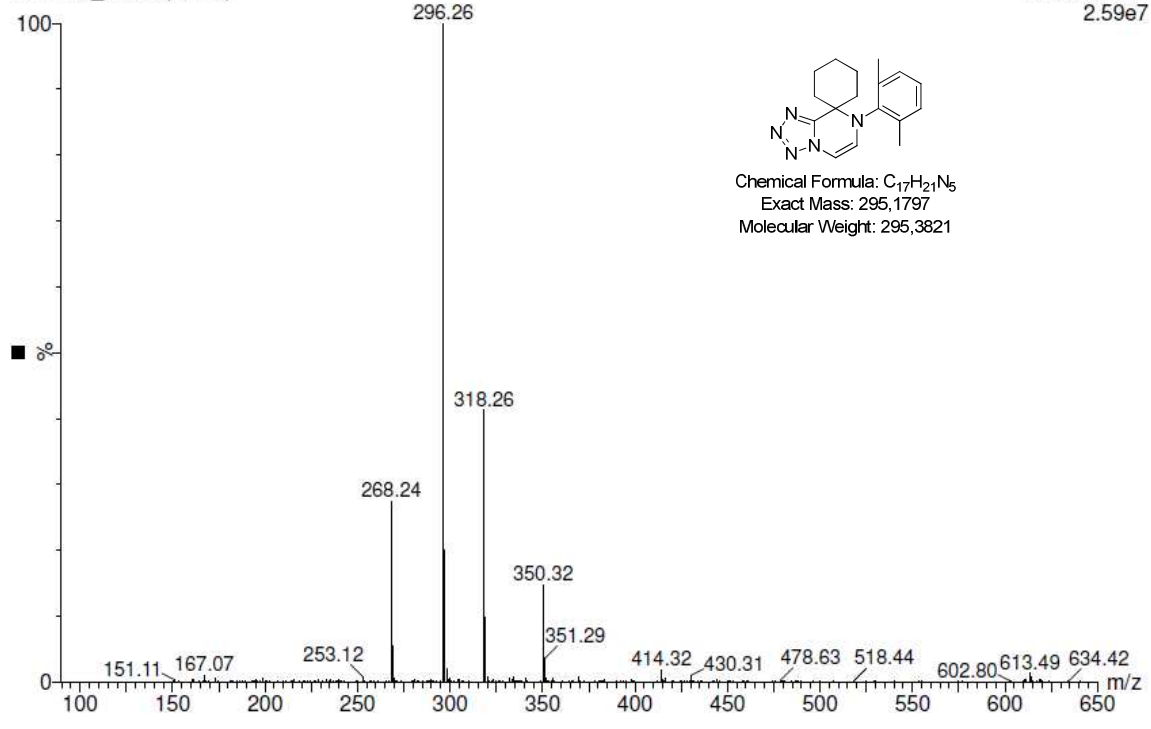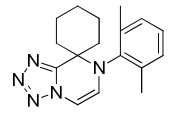

Chemical Formula: C<sub>17</sub>H<sub>21</sub>N<sub>5</sub>  
Exact Mass: 295,1797  
Molecular Weight: 295,3821



8g: N-(1-(1-(2,2-dimethoxyethyl)-1H-tetrazol-5-yl)cyclohexyl)pyridin-2-amine.

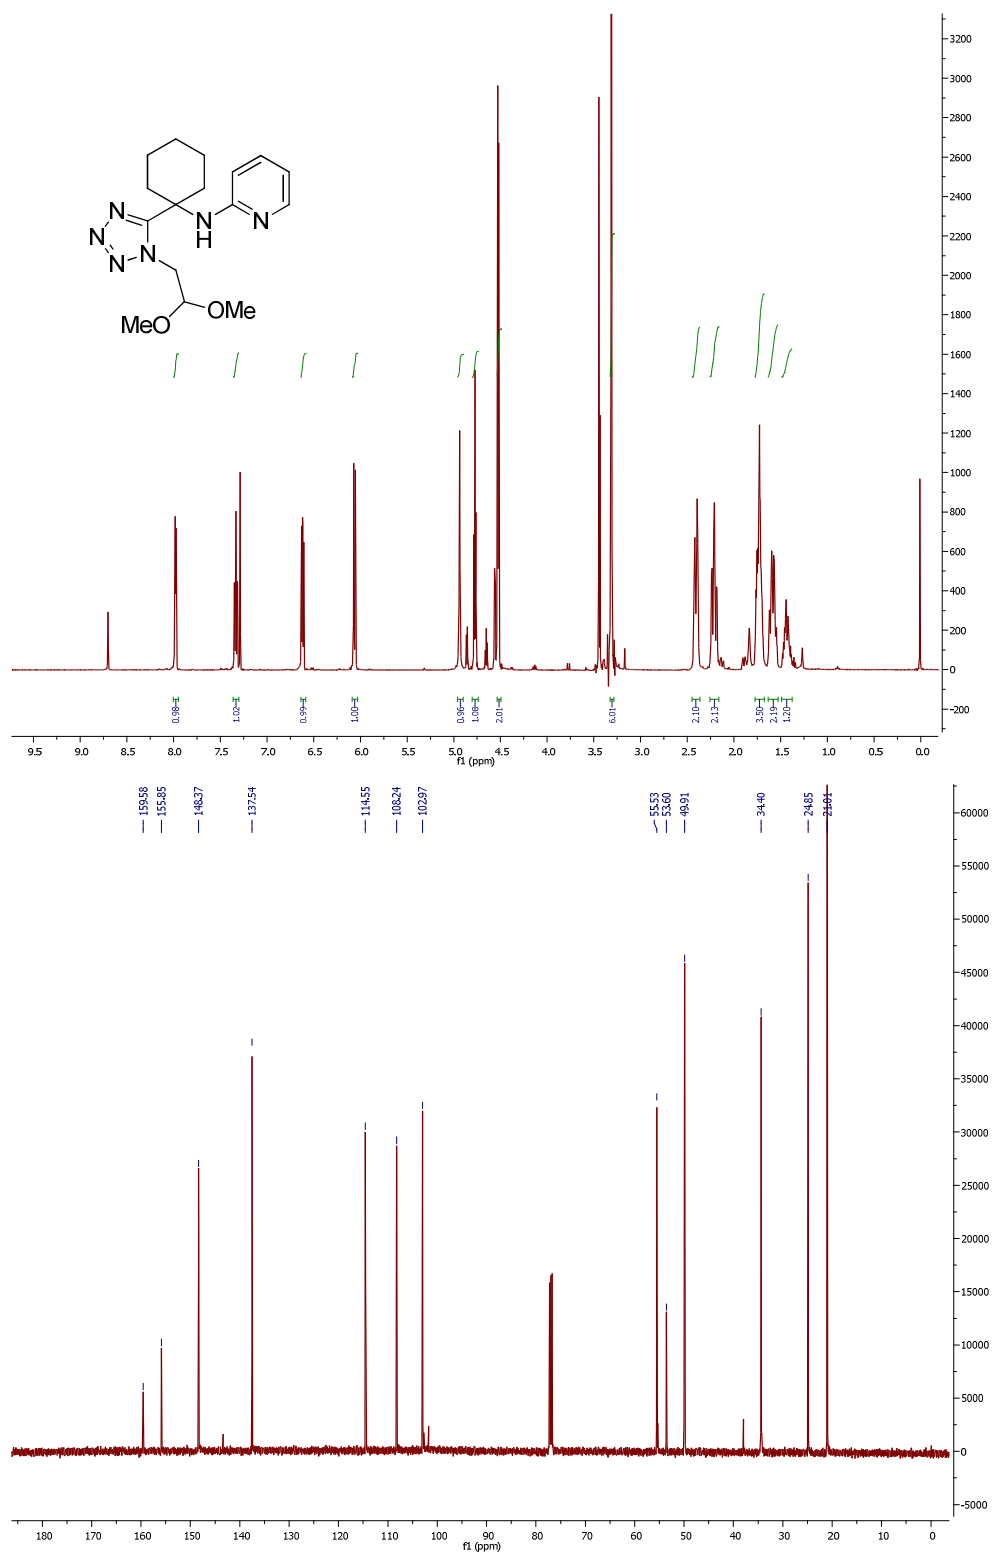

PHP245\_1\_Silica\_4.6X250\_MeOH\_5-30%\_6

PHP245\_1

3: Diode Array  
Range: 1.562e+1

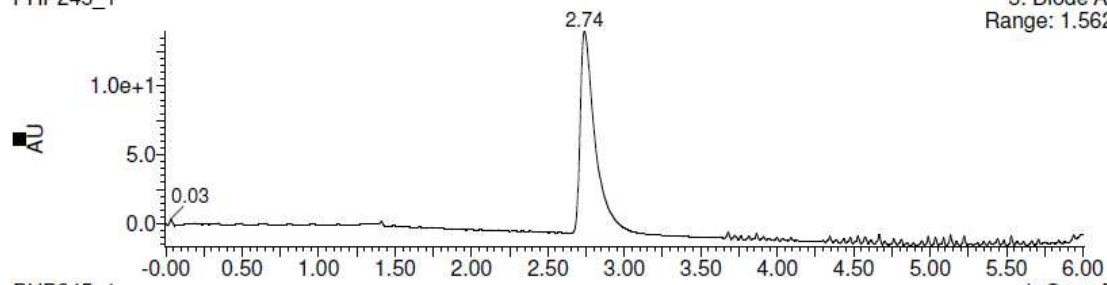

PHP245\_1

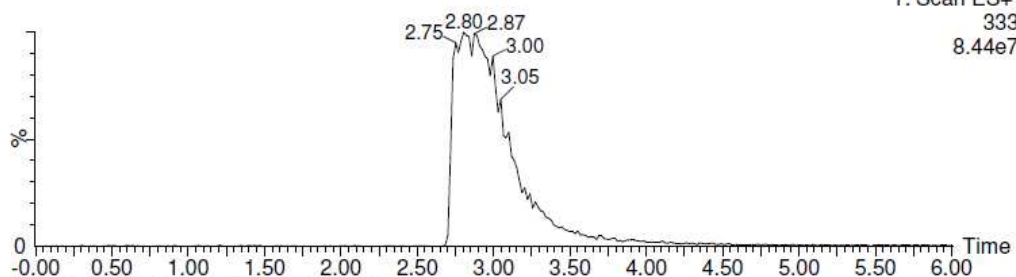

1: Scan ES+  
333  
8.44e7

PHP245\_1\_Silica\_4.6X250\_MeOH\_5-30%\_6

PHP245\_1 158 (2.735)

1: Scan ES+  
7.40e7

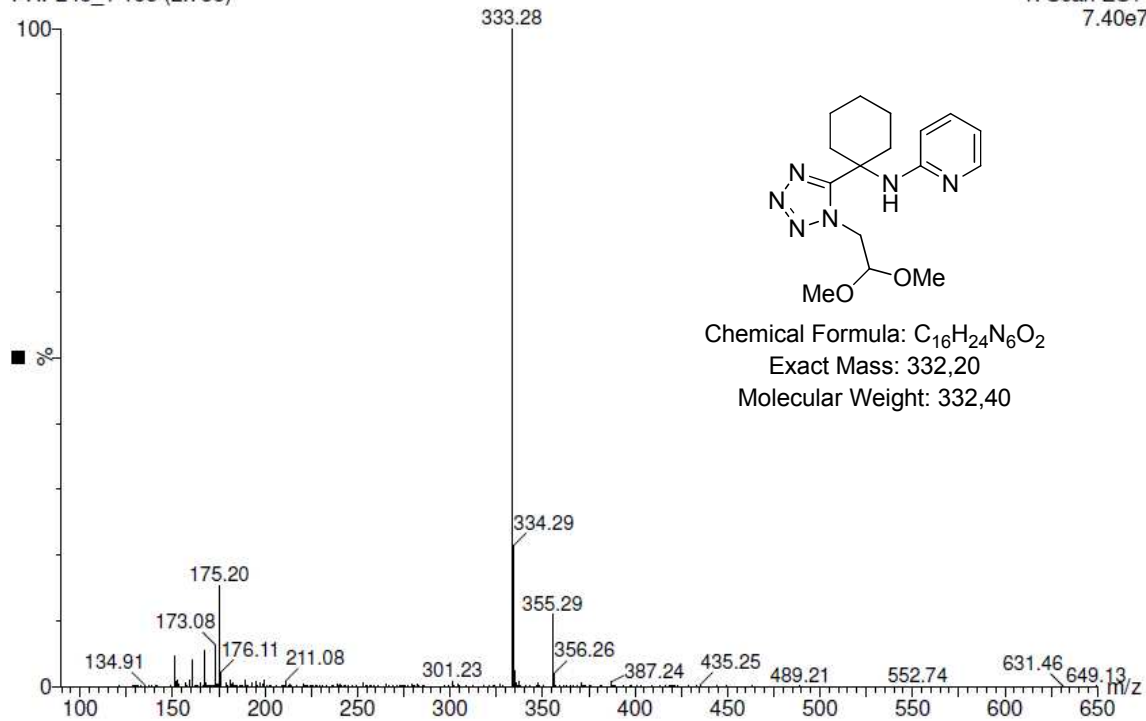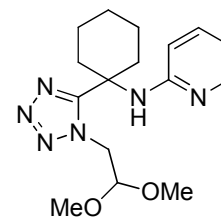

Chemical Formula: C<sub>16</sub>H<sub>24</sub>N<sub>6</sub>O<sub>2</sub>  
Exact Mass: 332.20  
Molecular Weight: 332.40

2g: 7'-(pyridin-2-yl)-7'H-spiro[cyclohexane-1,8'-tetrazolo[1,5-a]pyrazine].

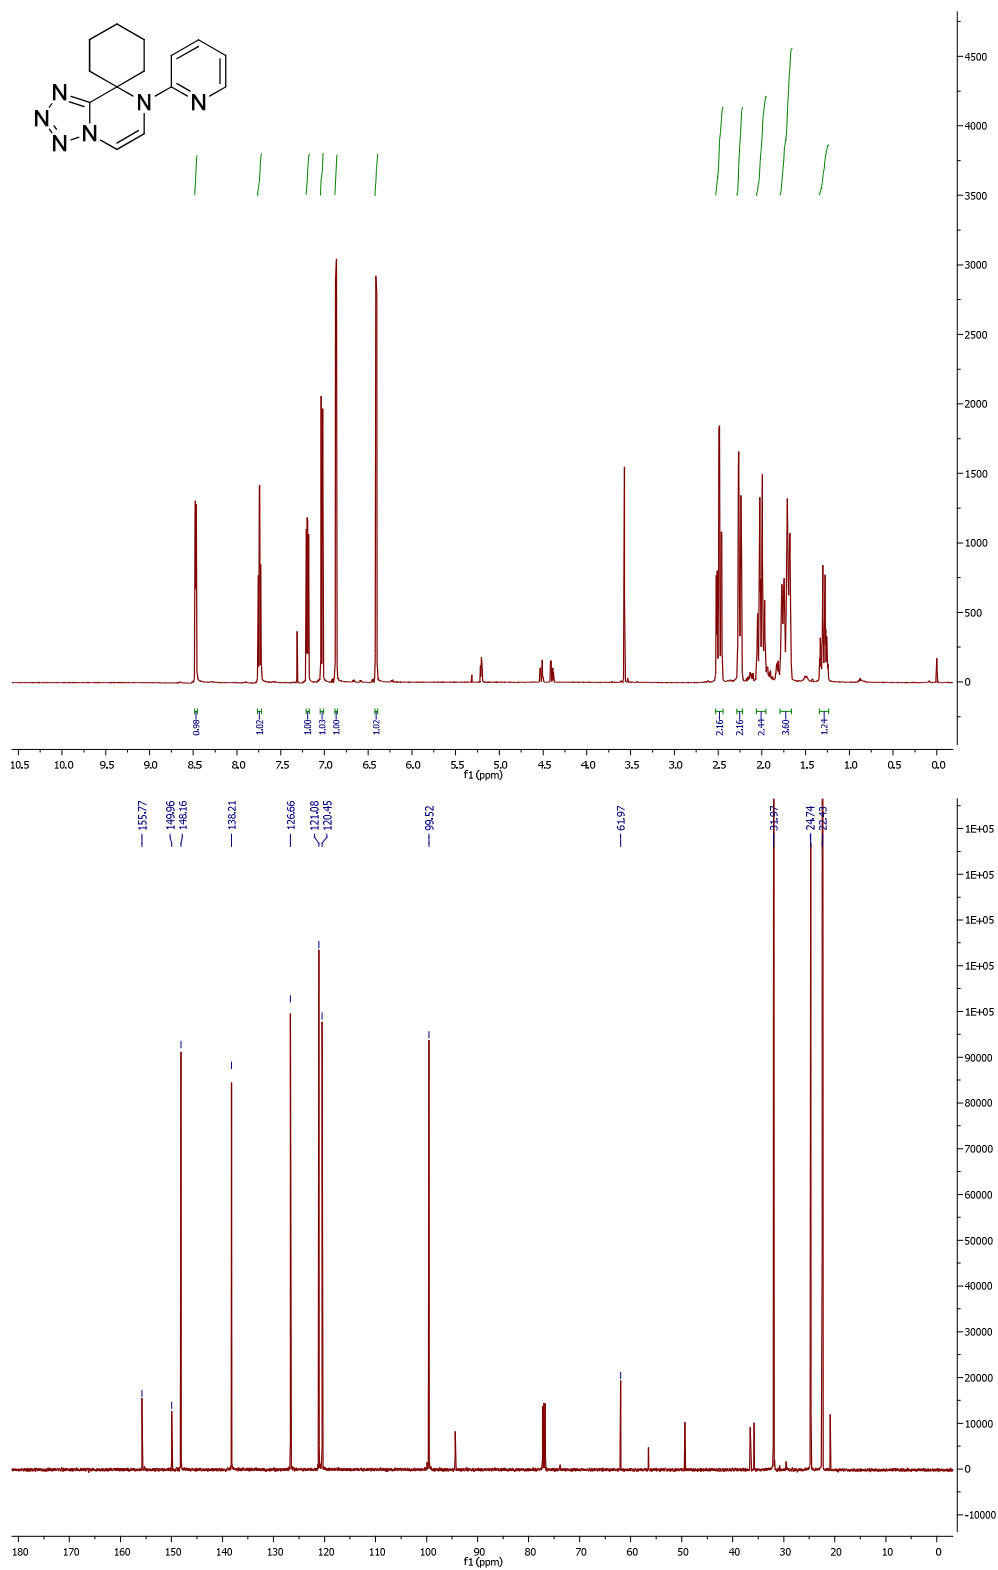

PHP259\_1\_Silica\_4.6X250\_MeOH\_5-30%\_6

PHP259\_1

3: Diode Array  
Range: 2.564e+1

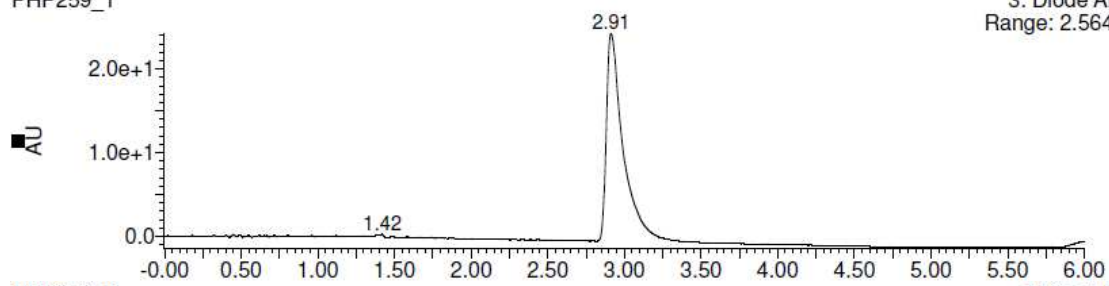

PHP259\_1

1: Scan ES+  
269  
8.19e7

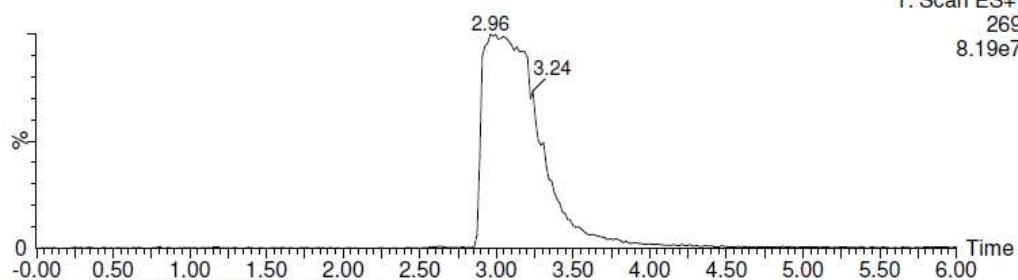

PHP259\_1\_Silica\_4.6X250\_MeOH\_5-30%\_6

PHP259\_1 183 (3.169)

1: Scan ES+  
7.54e7

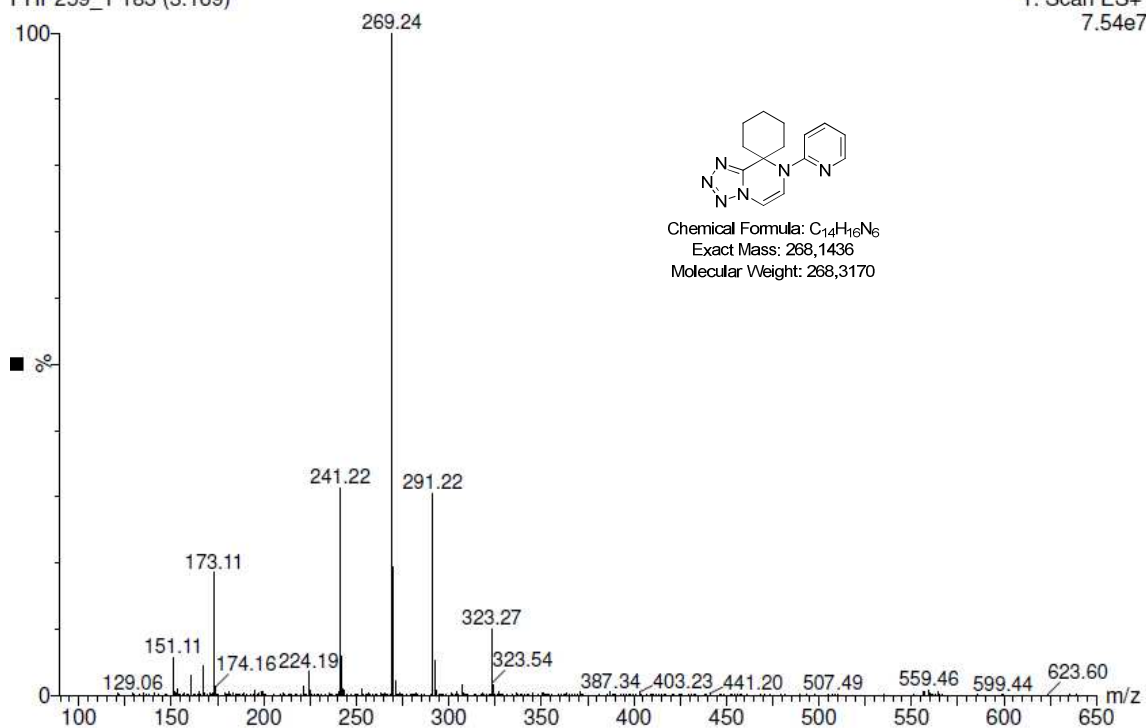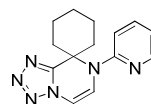

Chemical Formula: C<sub>14</sub>H<sub>16</sub>N<sub>6</sub>  
Exact Mass: 268,1436  
Molecular Weight: 268,3170

8h: 1-(1-(2,2-dimethoxyethyl)-1H-tetrazol-5-yl)-N-phenethylpropan-1-amine.

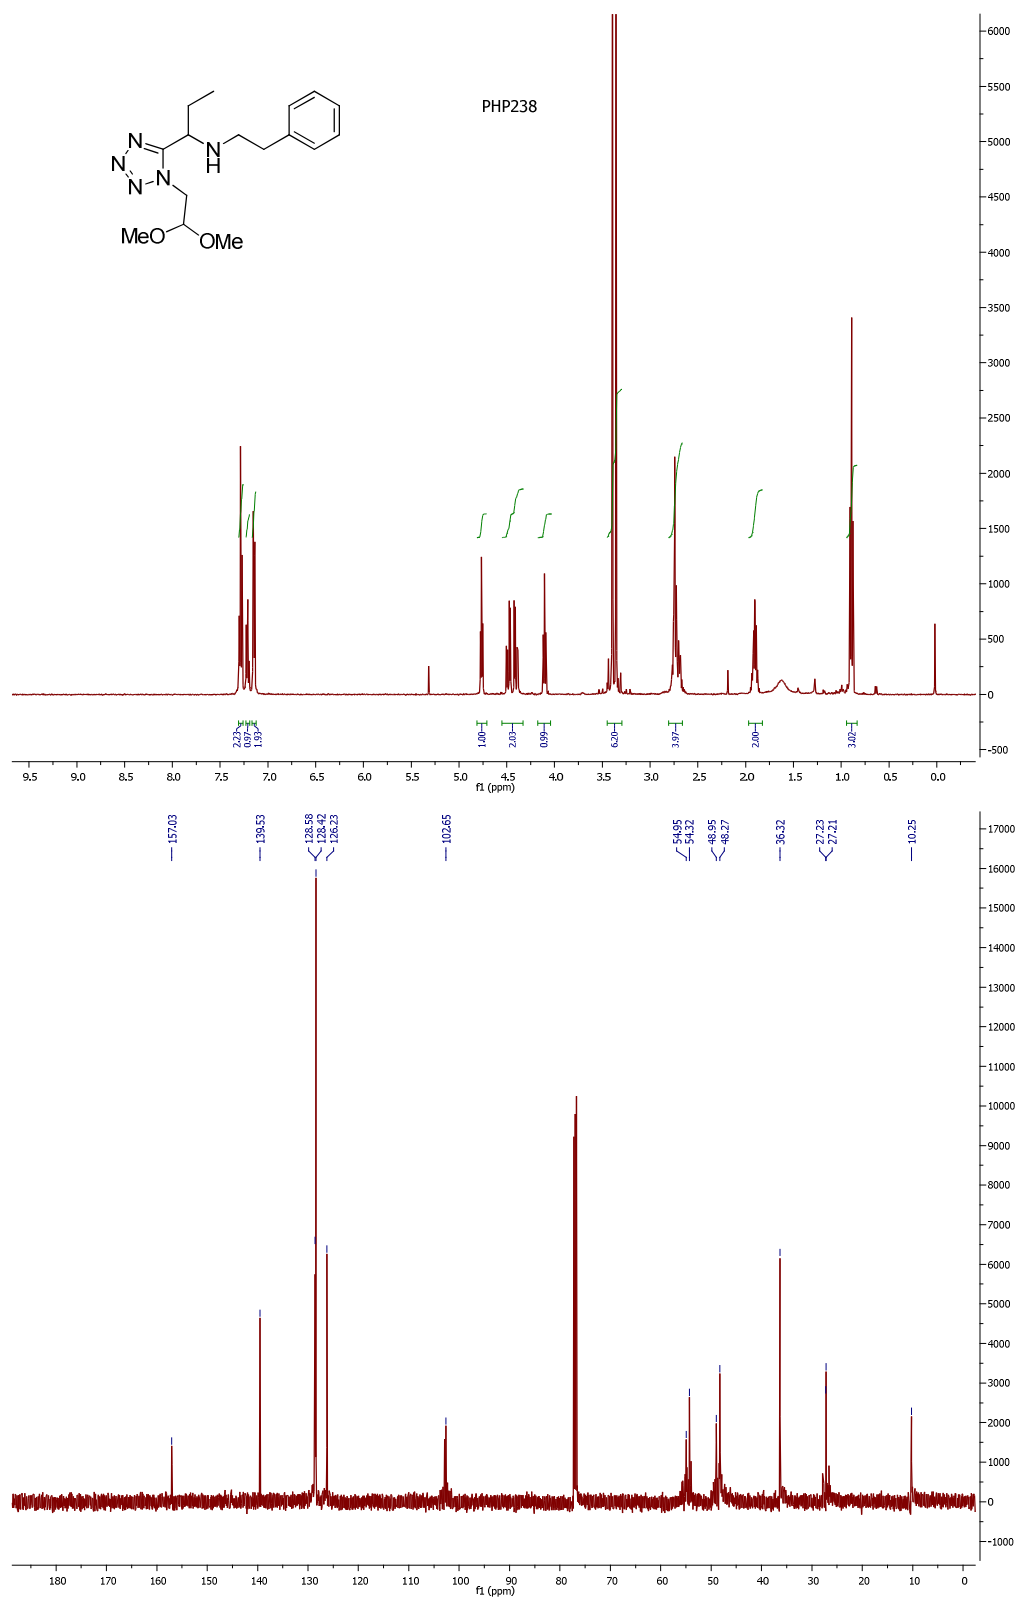

PHP238\_1\_Silica\_4.6X250\_MeOH\_5-30%\_6  
PHP238\_1

3: Diode Array  
Range: 1.892

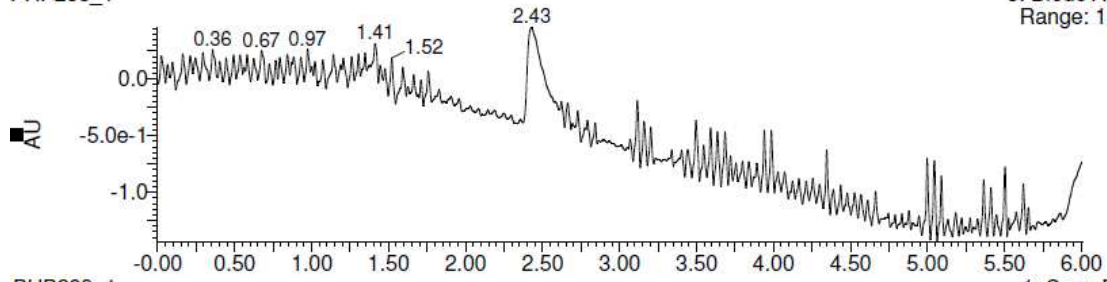

PHP238\_1

1: Scan ES+  
320  
4.98e7

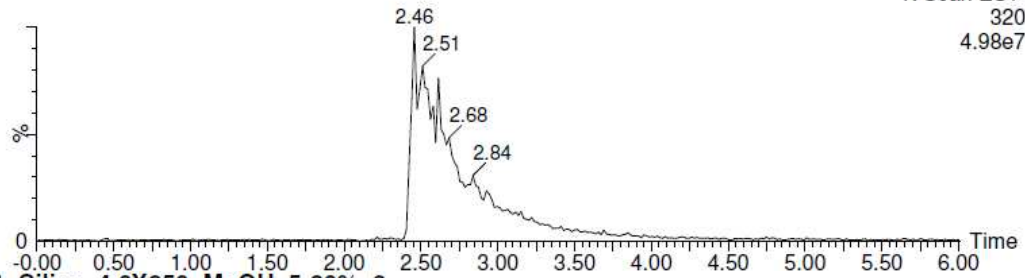

PHP238\_1\_Silica\_4.6X250\_MeOH\_5-30%\_6  
PHP238\_1 142 (2.457)

1: Scan ES+  
4.98e7

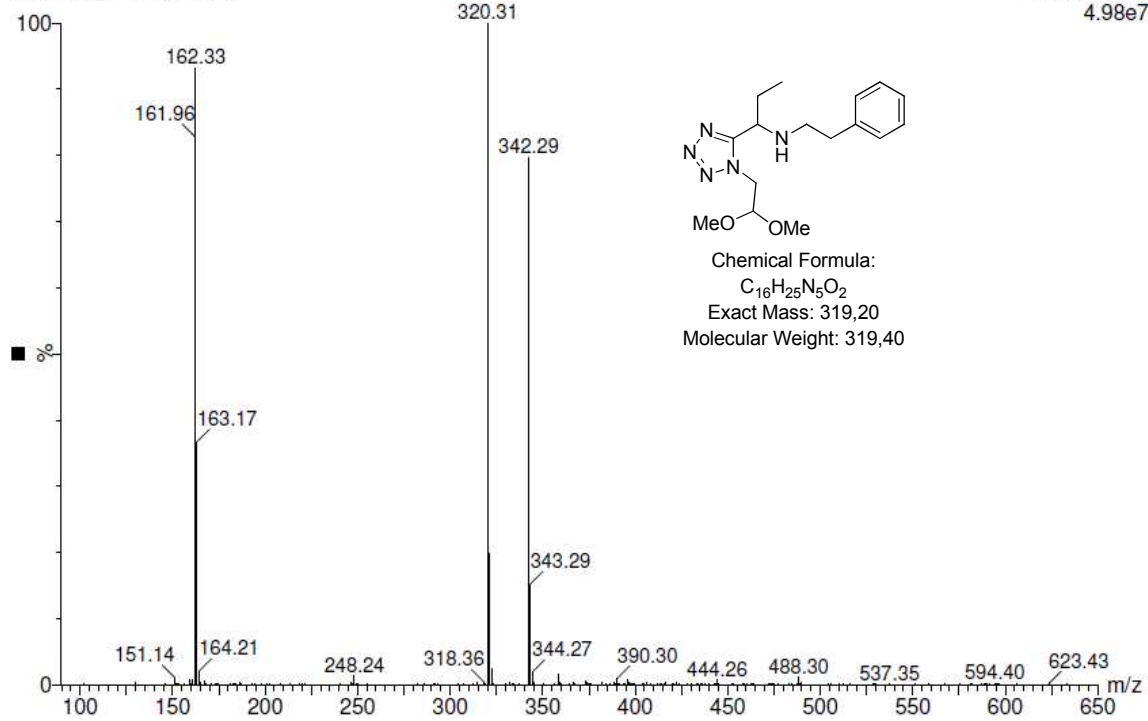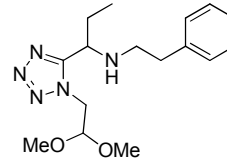

Chemical Formula:  
C<sub>16</sub>H<sub>25</sub>N<sub>5</sub>O<sub>2</sub>  
Exact Mass: 319,20  
Molecular Weight: 319,40

2h: 8-ethyl-7-phenethyl-7,8-dihydro-1,5-benzodiazepine.

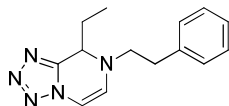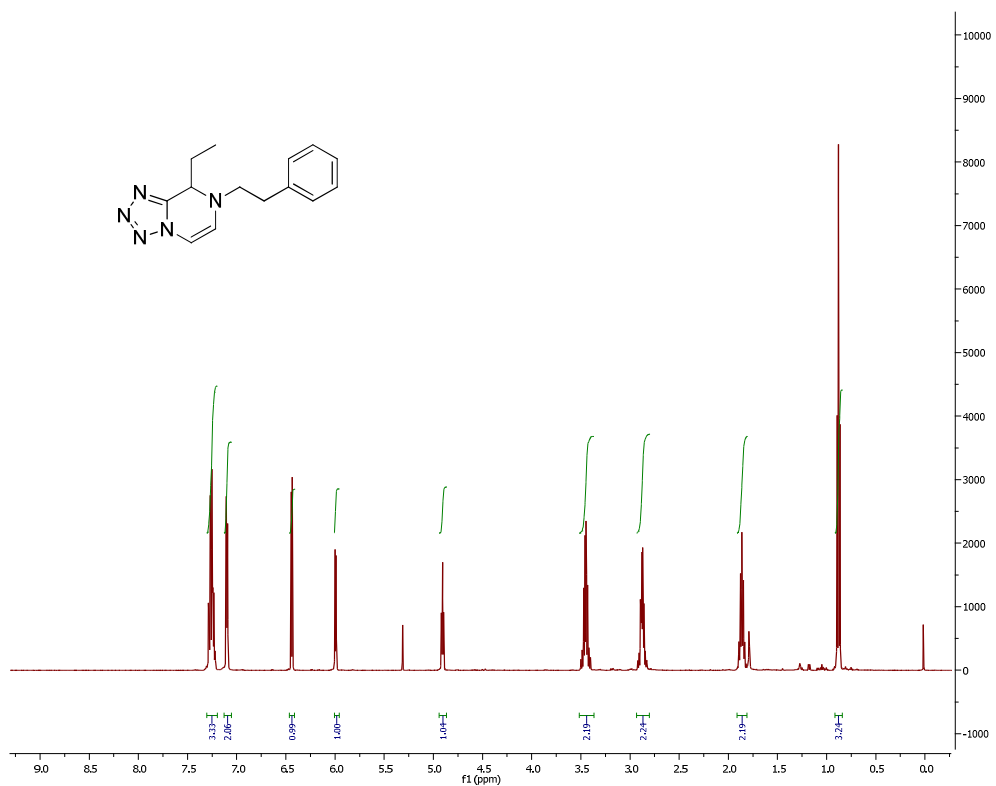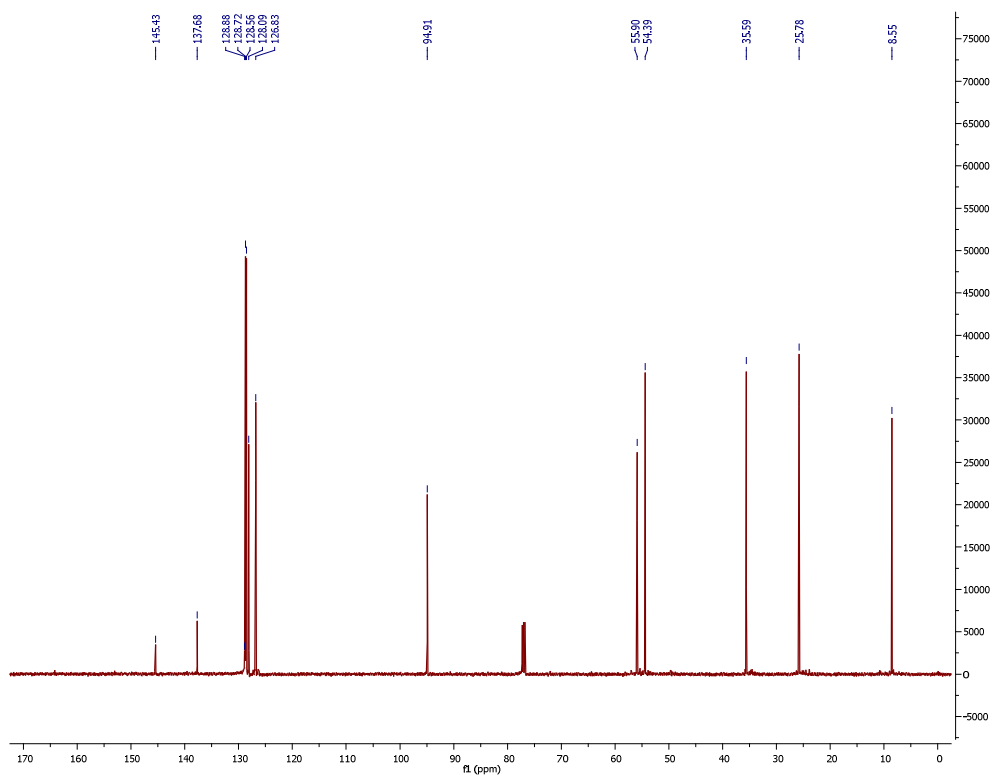

PHP250\_1\_Silica\_4.6X250\_MeOH\_5-30%\_6

PHP250\_1

3: Diode Array  
Range: 4.74

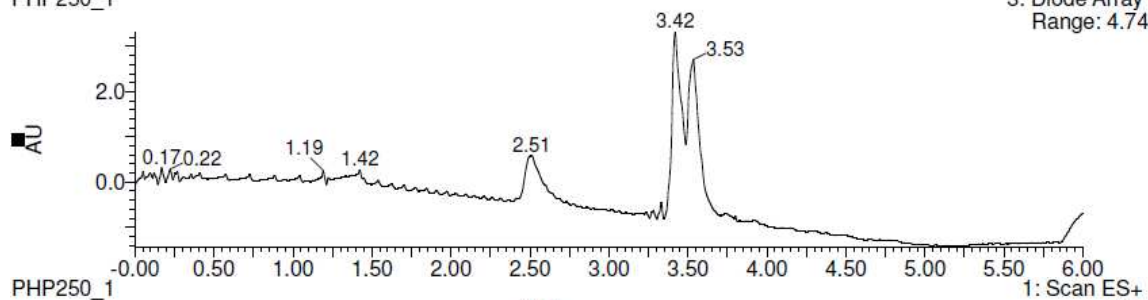

PHP250\_1

1: Scan ES+  
256  
3.32e7

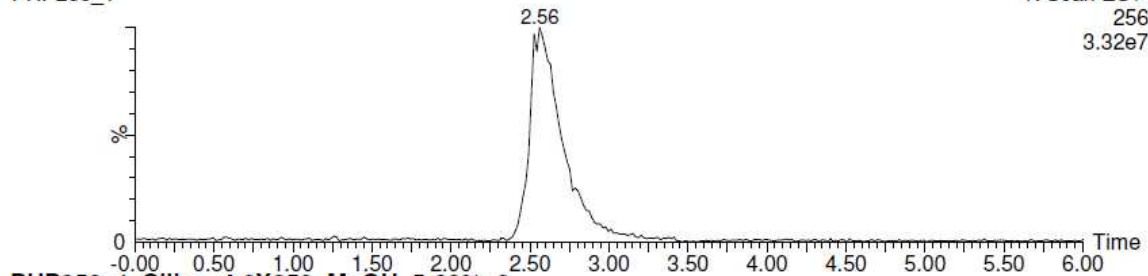

PHP250\_1\_Silica\_4.6X250\_MeOH\_5-30%\_6

PHP250\_1 148 (2.561)

1: Scan ES+  
3.32e7

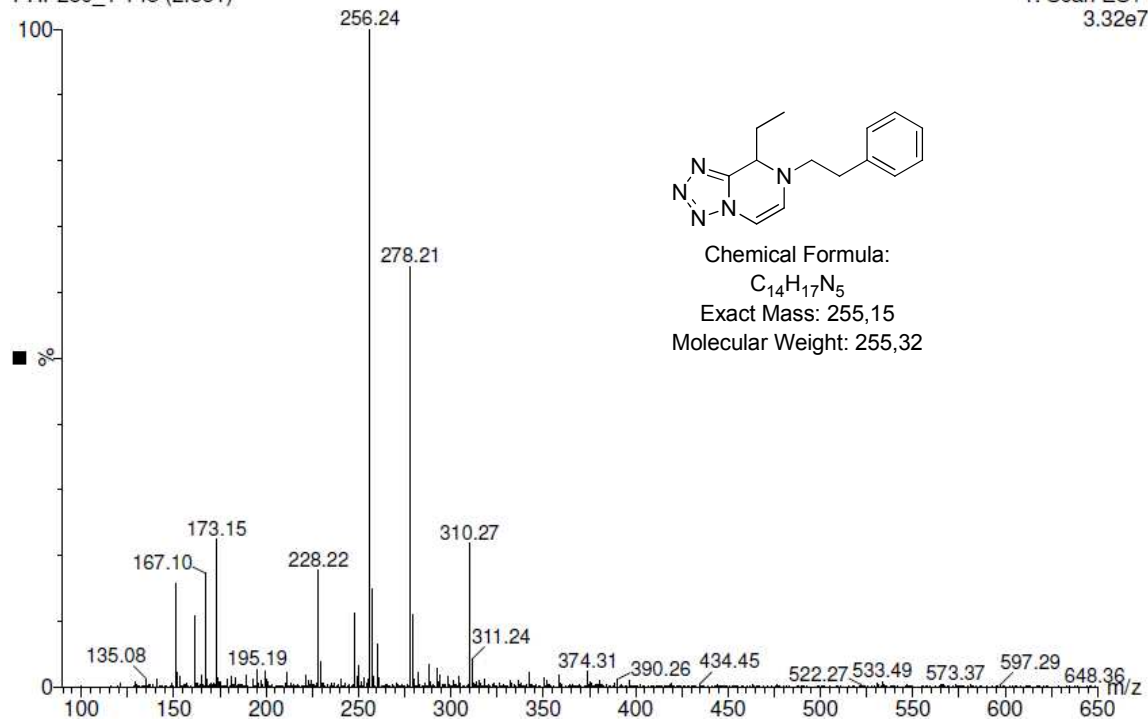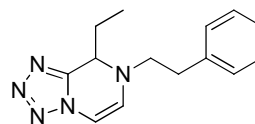

Chemical Formula:  
C<sub>14</sub>H<sub>17</sub>N<sub>5</sub>  
Exact Mass: 255,15  
Molecular Weight: 255,32



**8i: N-(1-(1-(2,2-dimethoxyethyl)-1H-tetrazol-5-yl)propyl)butan-1-amine.**

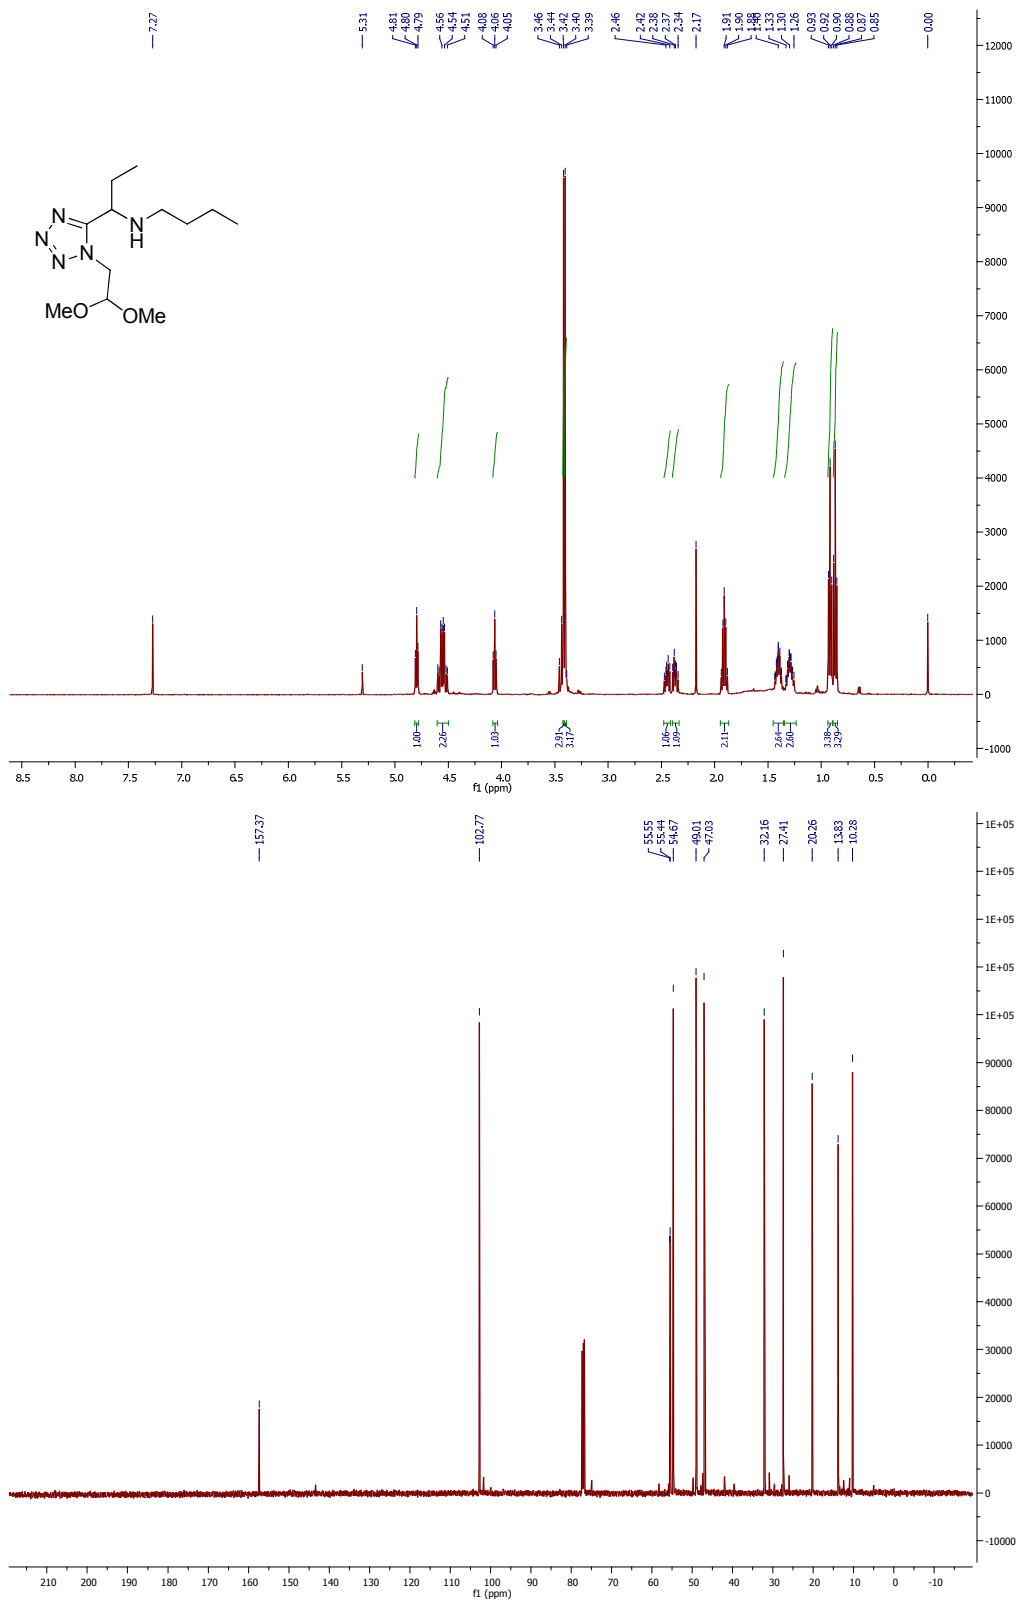

PHP145\_1\_Silica\_4.6X250\_MeOH\_5-30%\_6

PHP145\_1

3: Diode Array  
Range: 1.722

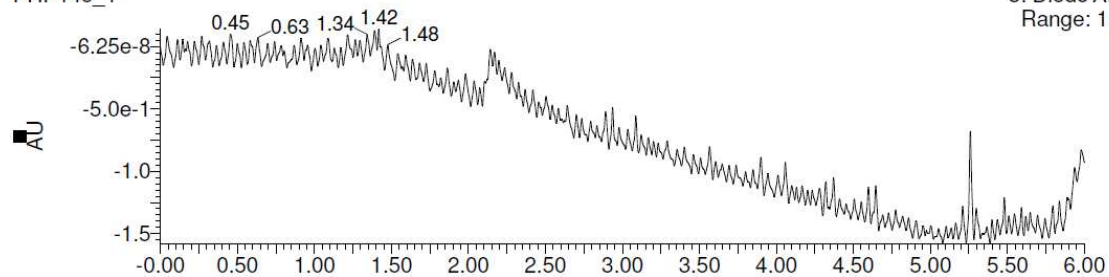

PHP145\_1

1: Scan ES+  
272  
8.33e7

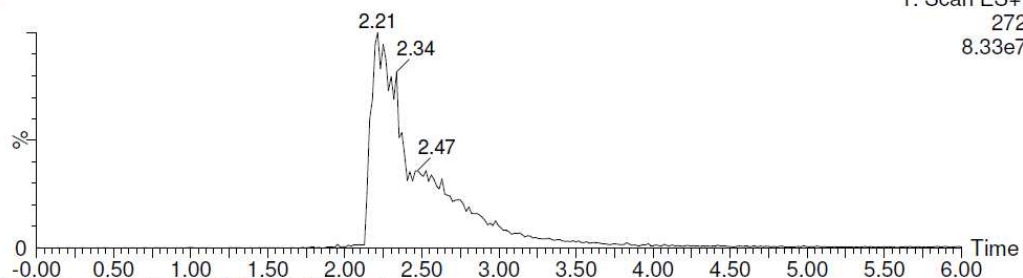

PHP145\_1\_Silica\_4.6X250\_MeOH\_5-30%\_6

PHP145\_1 128 (2.214)

1: Scan ES+  
8.33e7

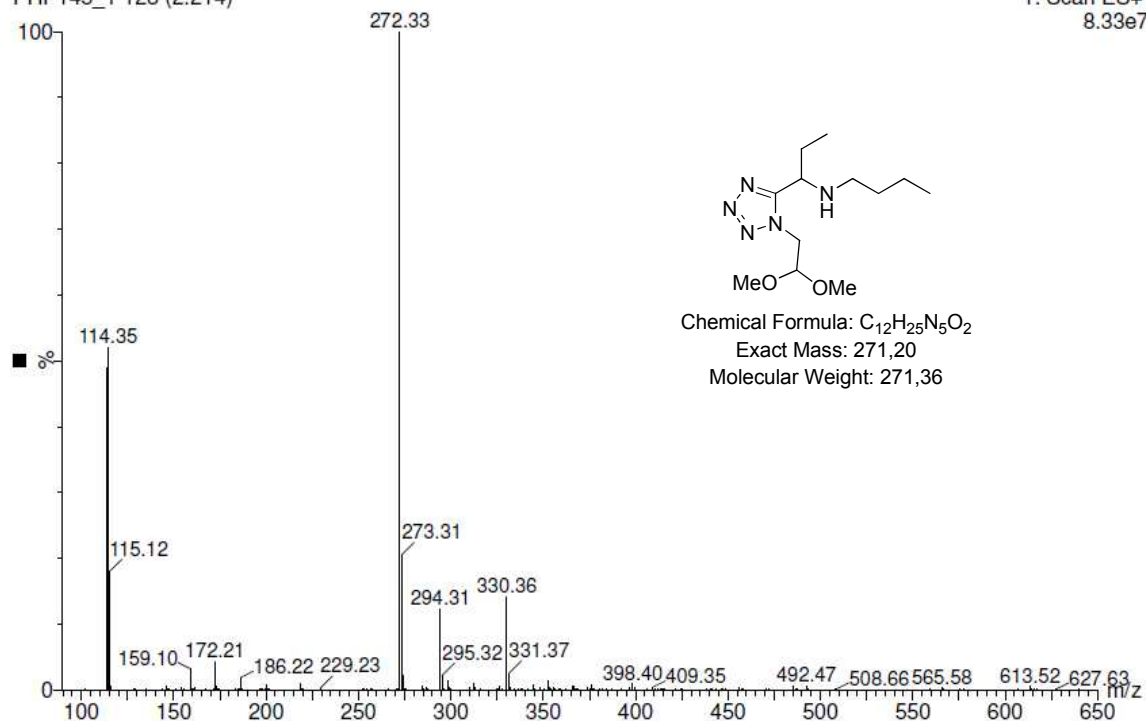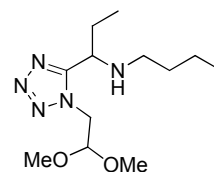

Chemical Formula: C<sub>12</sub>H<sub>25</sub>N<sub>5</sub>O<sub>2</sub>  
Exact Mass: 271,20  
Molecular Weight: 271,36

2i: 7-butyl-8-ethyl-7,8-dihydro-1,5-a-pyrazine.

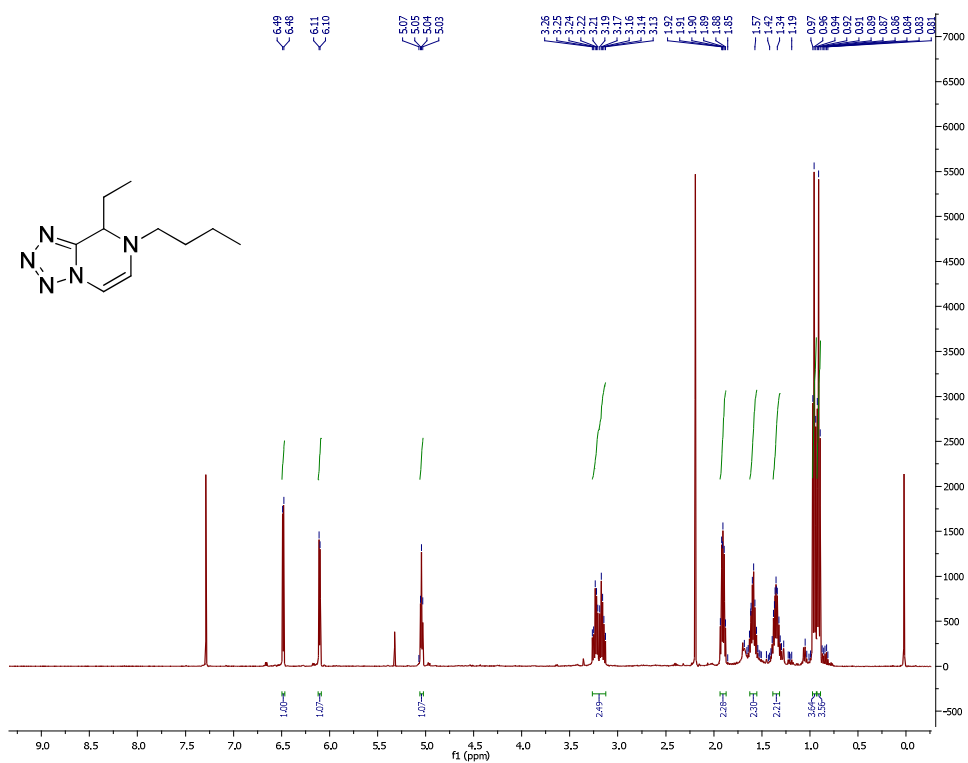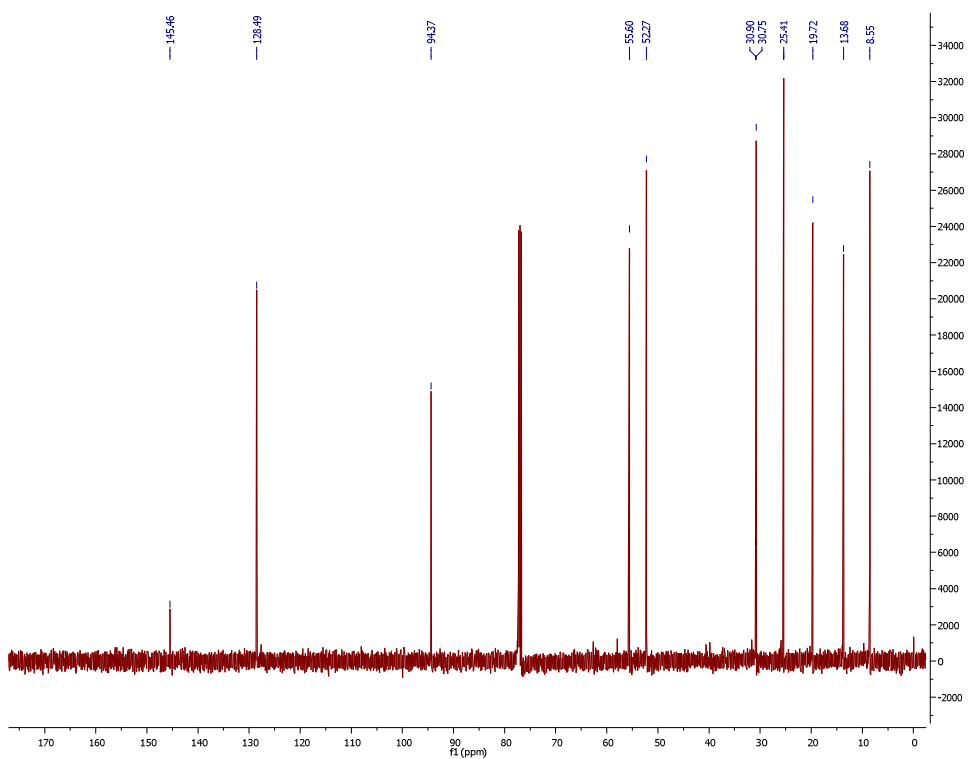

PHP152\_1\_Silica\_4.6X250\_MeOH\_5-30%\_6

PHP152\_1

3: Diode Array  
Range: 1.898

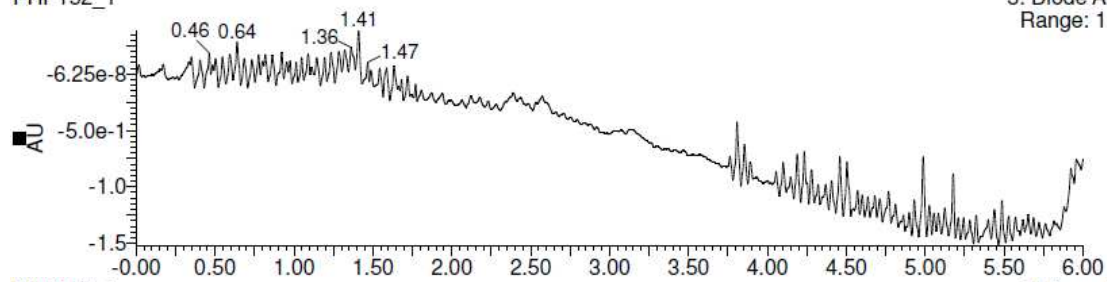

PHP152\_1

1: Scan ES+  
208  
1.46e6

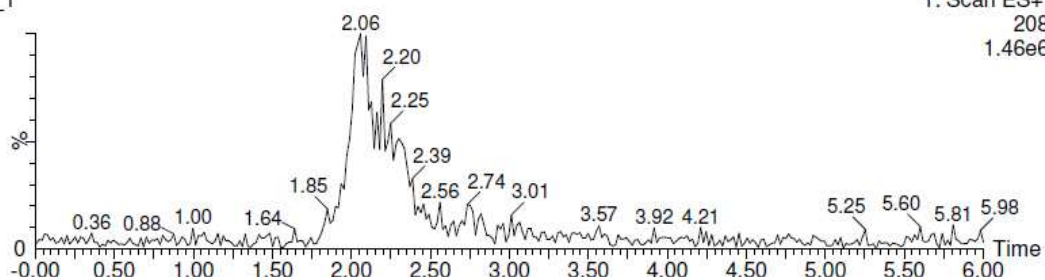

4.09e6

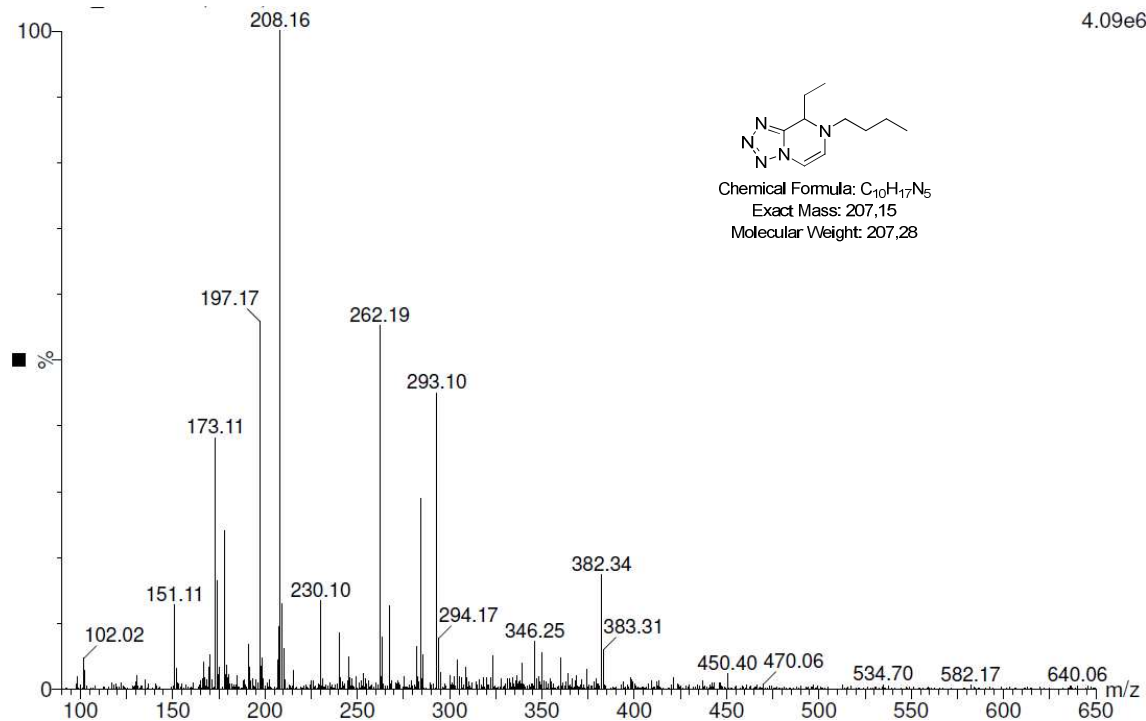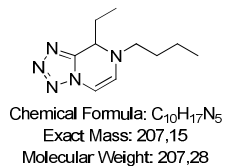

**11a: N-((1-(2,2-dimethoxyethyl)-1H-tetrazol-5-yl)(3,4,5-trimethoxyphenyl)methyl)propan-2-amine.**

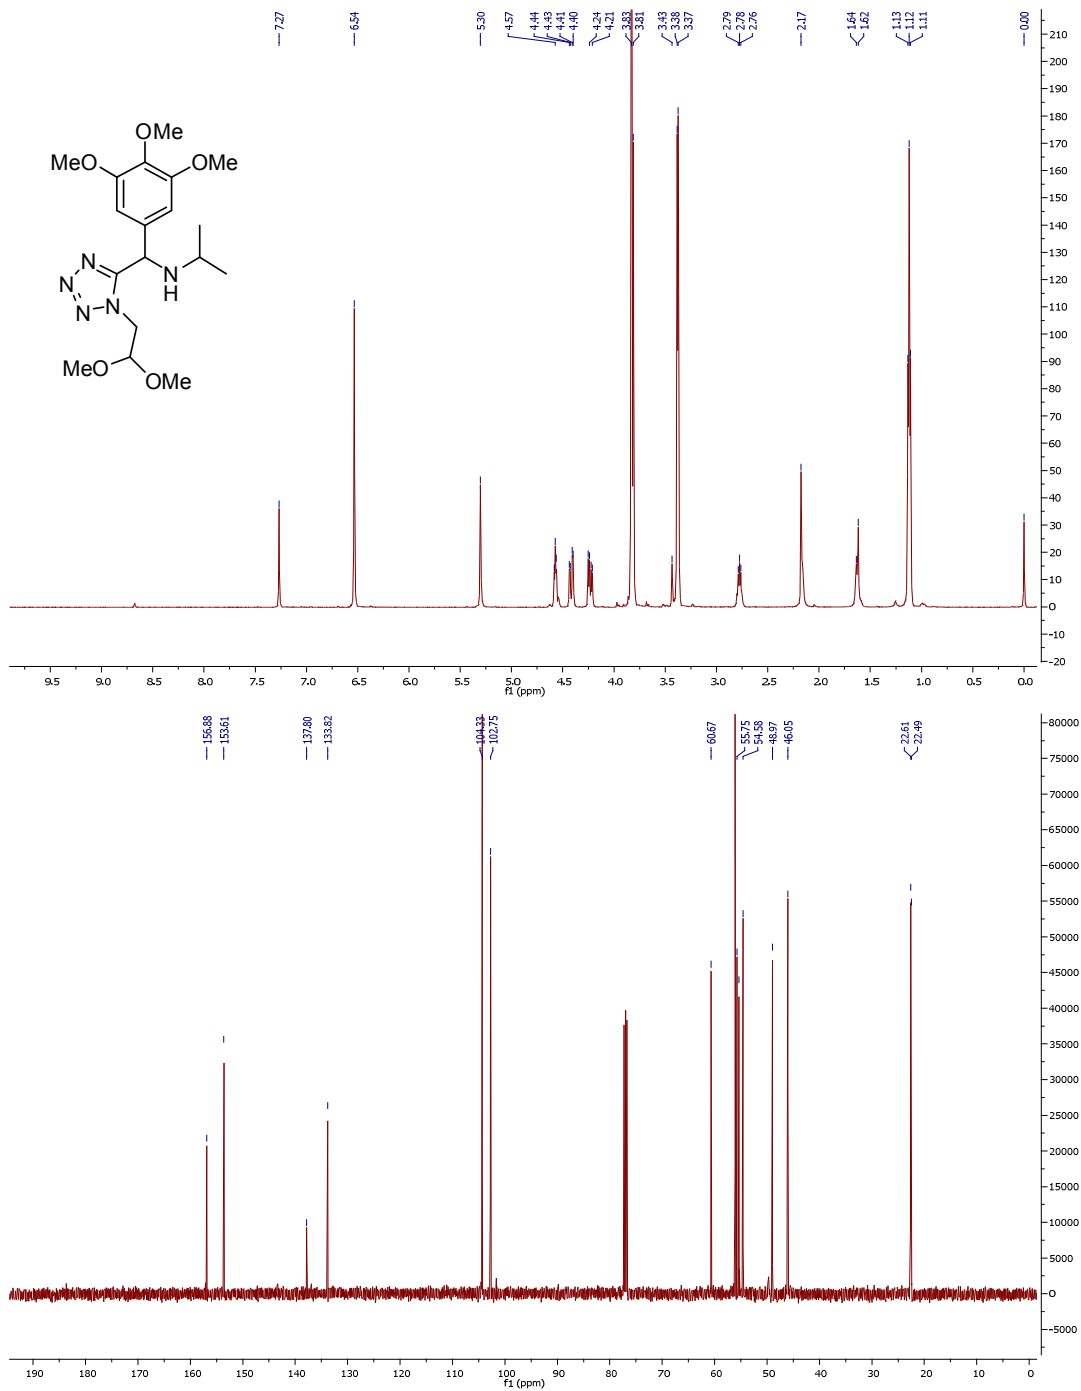

PHP086\_1\_Silica\_4.6X250\_MeOH\_5-30%\_6min

PHP086\_1

3: Diode Array  
Range: 4.065e+1

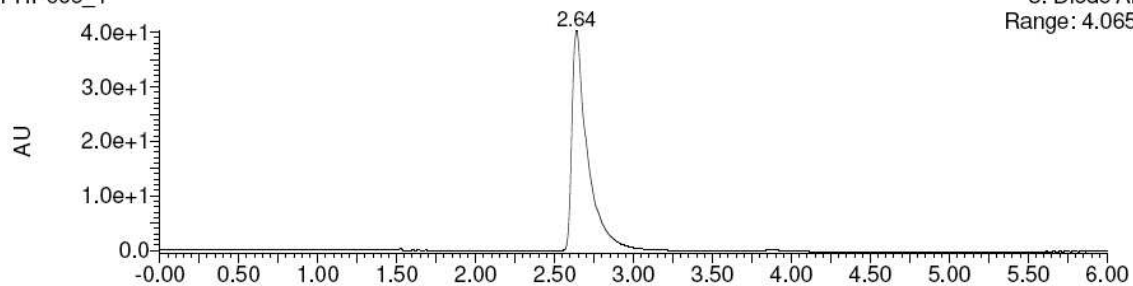

PHP086\_1

1: Scan ES+  
396.22  
6.25e6

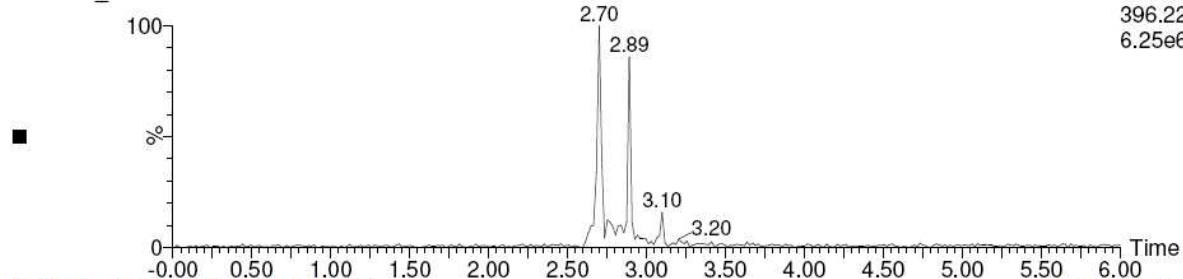

PHP086\_1 155 (2.683) Cm (153:169)

1: Scan ES+  
8.61e7

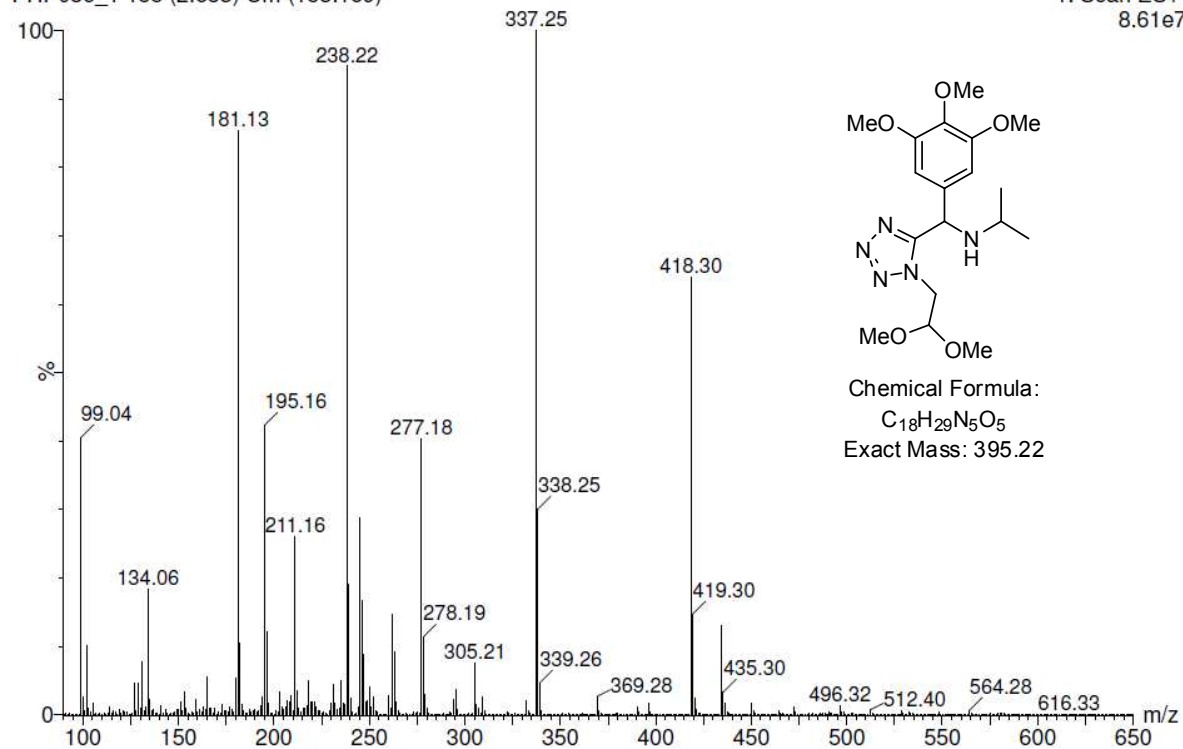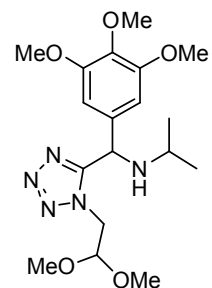

Chemical Formula:  
C<sub>18</sub>H<sub>29</sub>N<sub>5</sub>O<sub>5</sub>  
Exact Mass: 395.22

**3a: N-isopropyl-7,8,9-trimethoxy-11H-benzo[d]tetrazolo[1,5-a]azepin-11-amine**

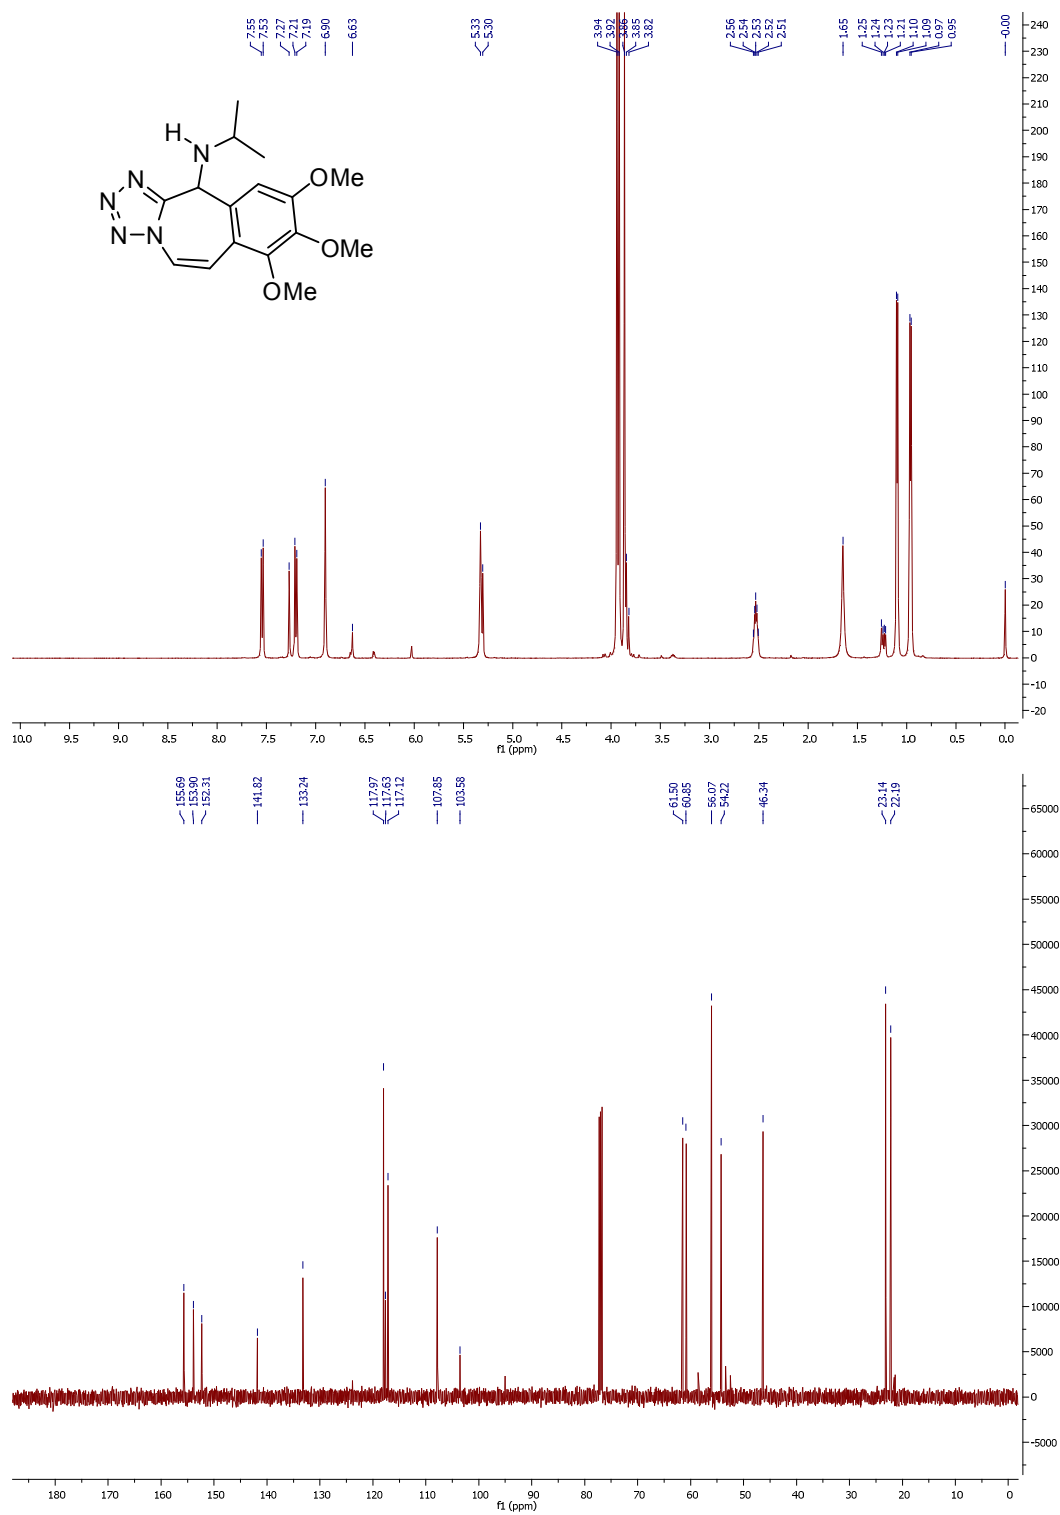

PHP098\_1\_Silica\_4.6X250\_MeOH\_5-30%\_6min

PHP098\_1

3: Diode Array  
Range: 9.215e+1

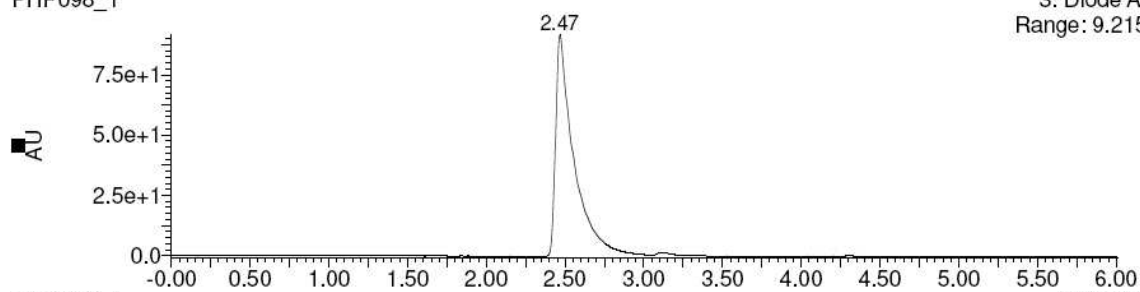

PHP098\_1

1: Scan ES+  
332.16  
1.10e7

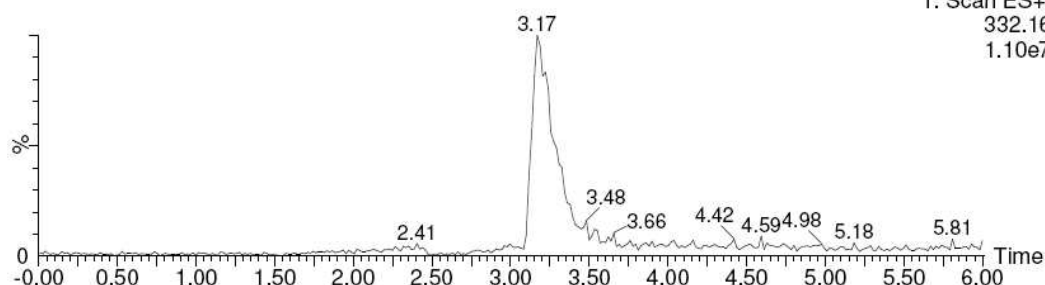

PHP098\_1 186 (3.221)

1: Scan ES+  
1.83e7

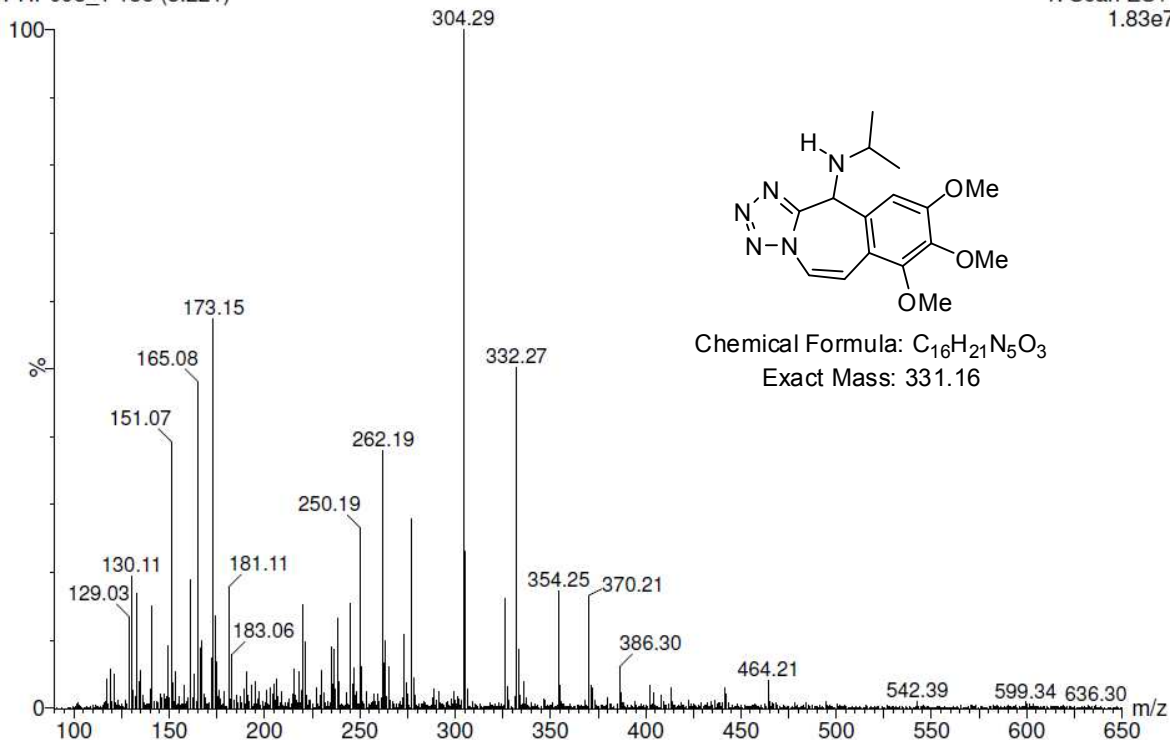



**11b: N-((1-(2,2-dimethoxyethyl)-1H-tetrazol-5-yl)(3,4,5-trimethoxyphenyl)methyl)-N-propylpropan-1-amine.**

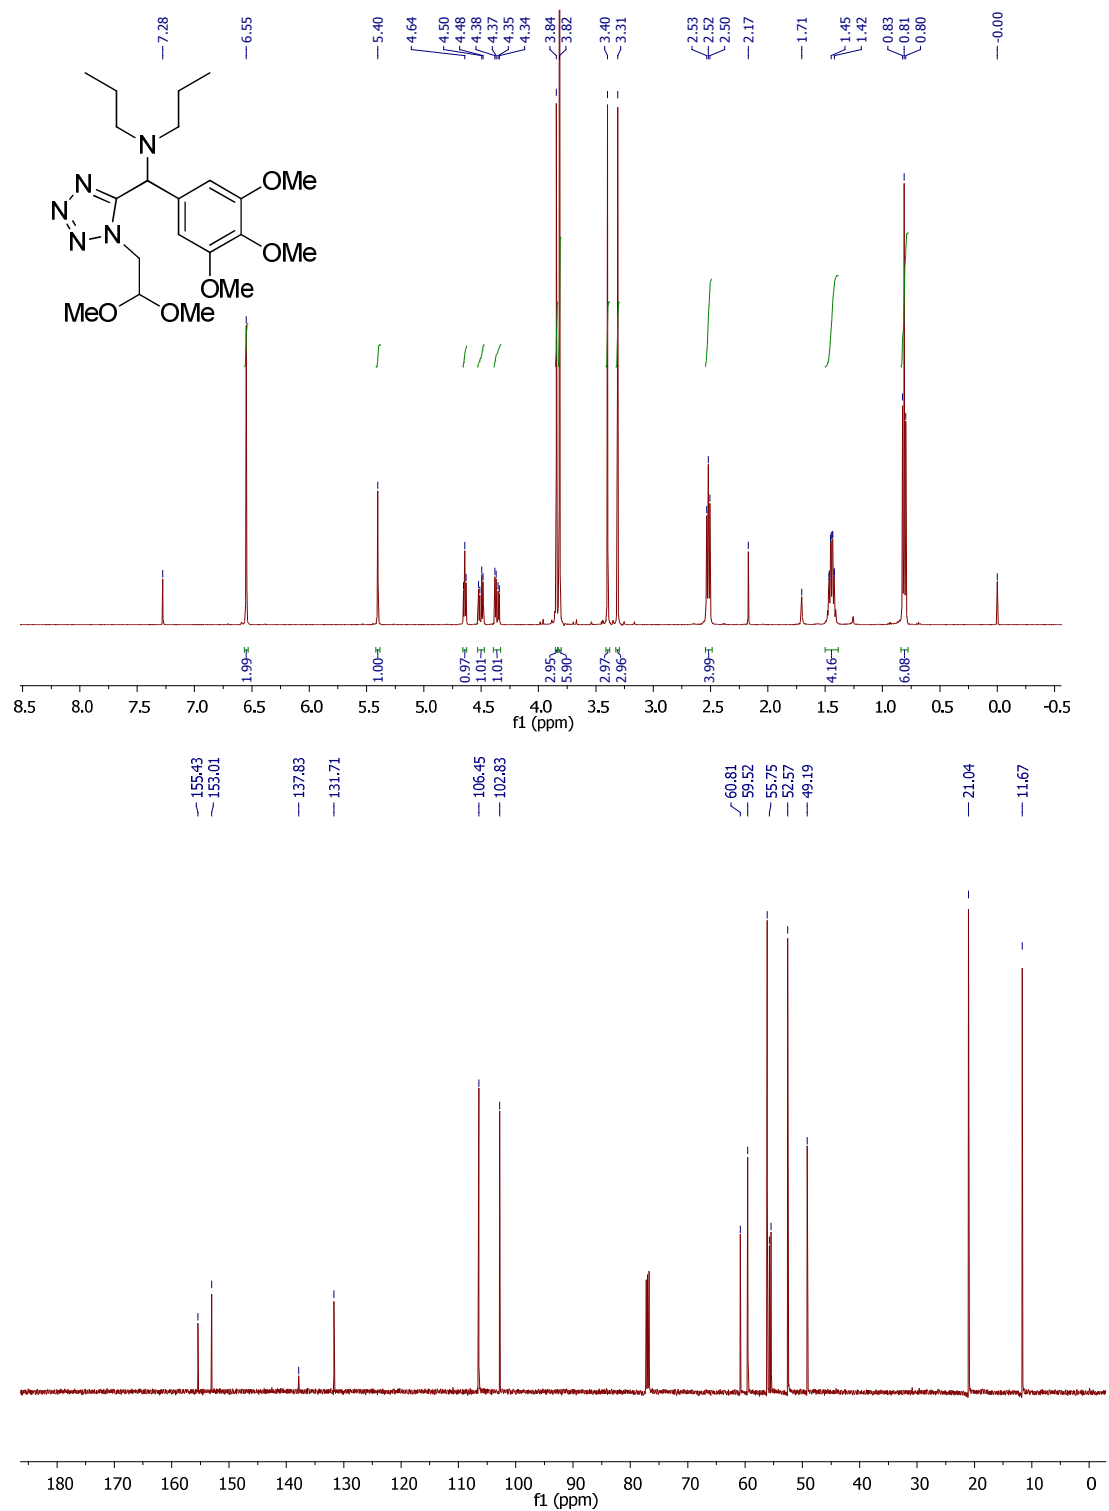

PHP211\_1\_Silica\_4.6X250\_MeOH\_5-30%\_6

PHP211\_1

3: Diode Array  
Range: 2.337e+1

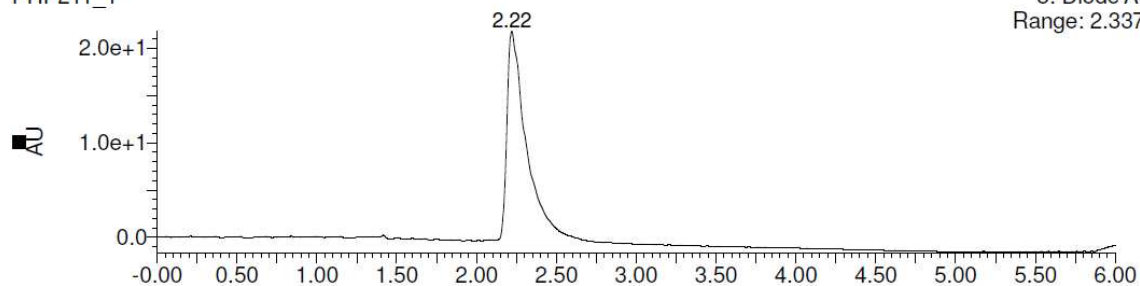

PHP211\_1

2: Scan ES-  
436.5  
1.11e5

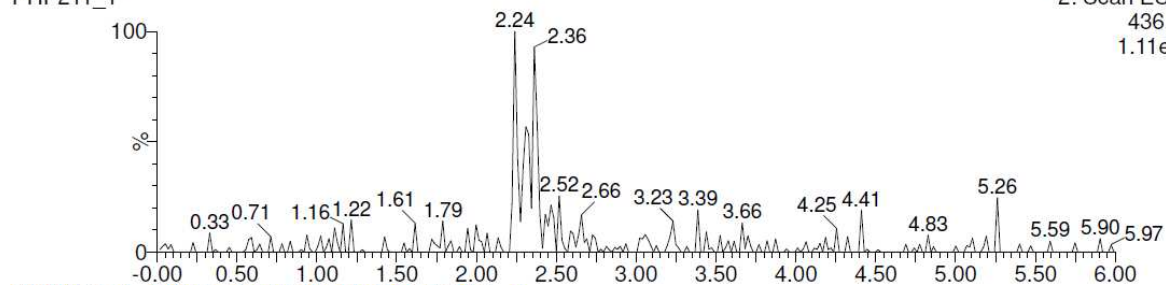

PHP211\_1\_Silica\_4.6X250\_MeOH\_5-30%\_6

PHP211\_1 129 (2.240)

2: Scan ES-  
1.01e5

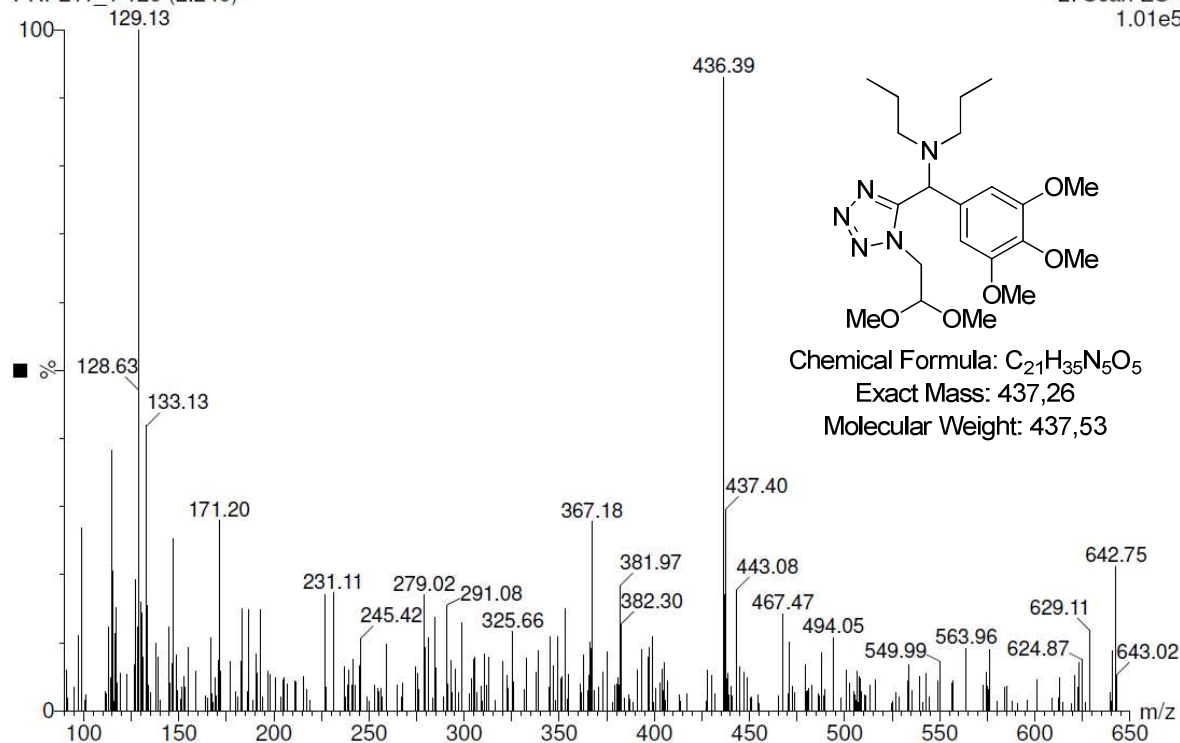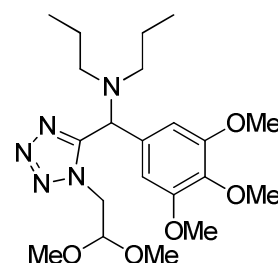

Chemical Formula:  $C_{21}H_{35}N_5O_5$

Exact Mass: 437.26

Molecular Weight: 437.53

**3b: 7,8,9-trimethoxy-N,N-dipropyl-11H-benzo[d]tetrazolo[1,5-a]azepin-11-amine.**

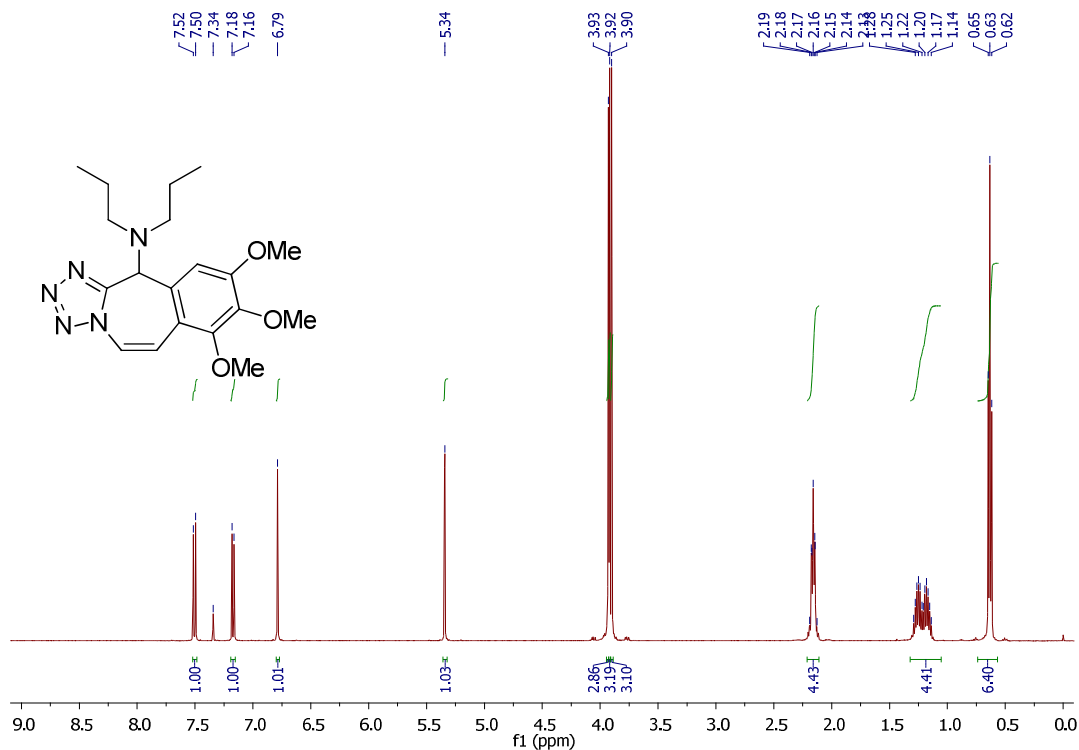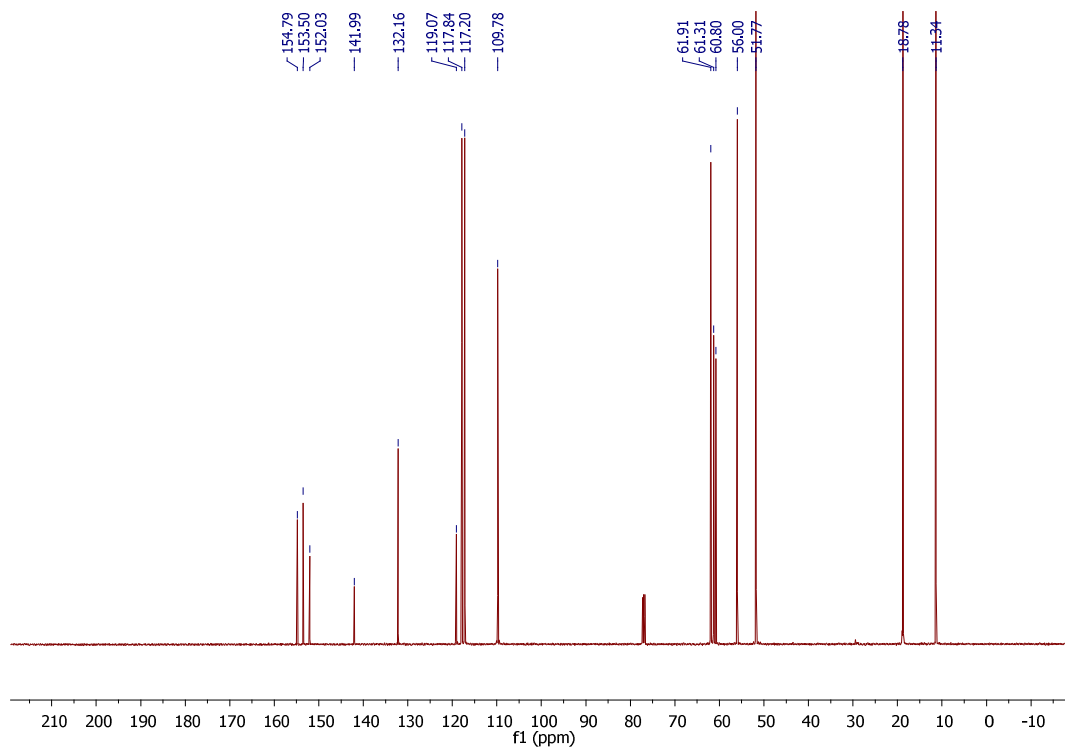

PHP214\_1\_Silica\_4.6X250\_MeOH\_5-30%\_6

PHP214\_1

3: Diode Array  
Range: 2.886e+1

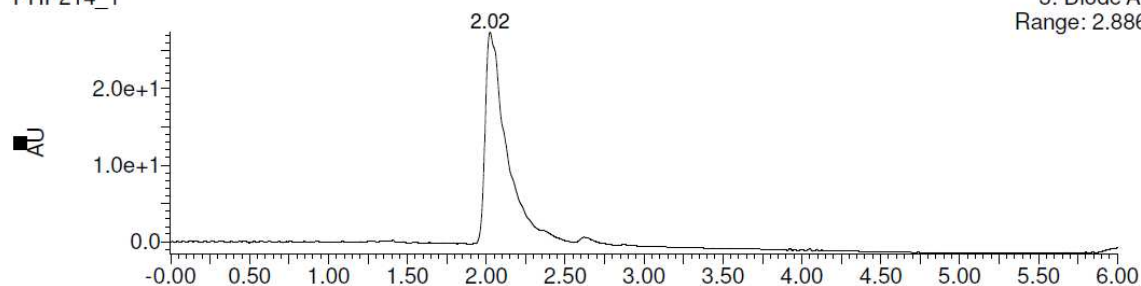

PHP214\_1

1: Scan ES+  
374  
1.28e6

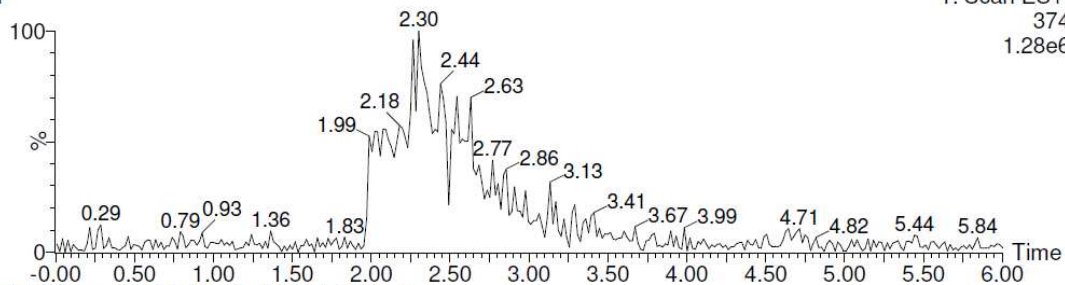

PHP214\_1\_Silica\_4.6X250\_MeOH\_5-30%\_6

PHP214\_1 120 (2.075)

1: Scan ES+  
8.29e7

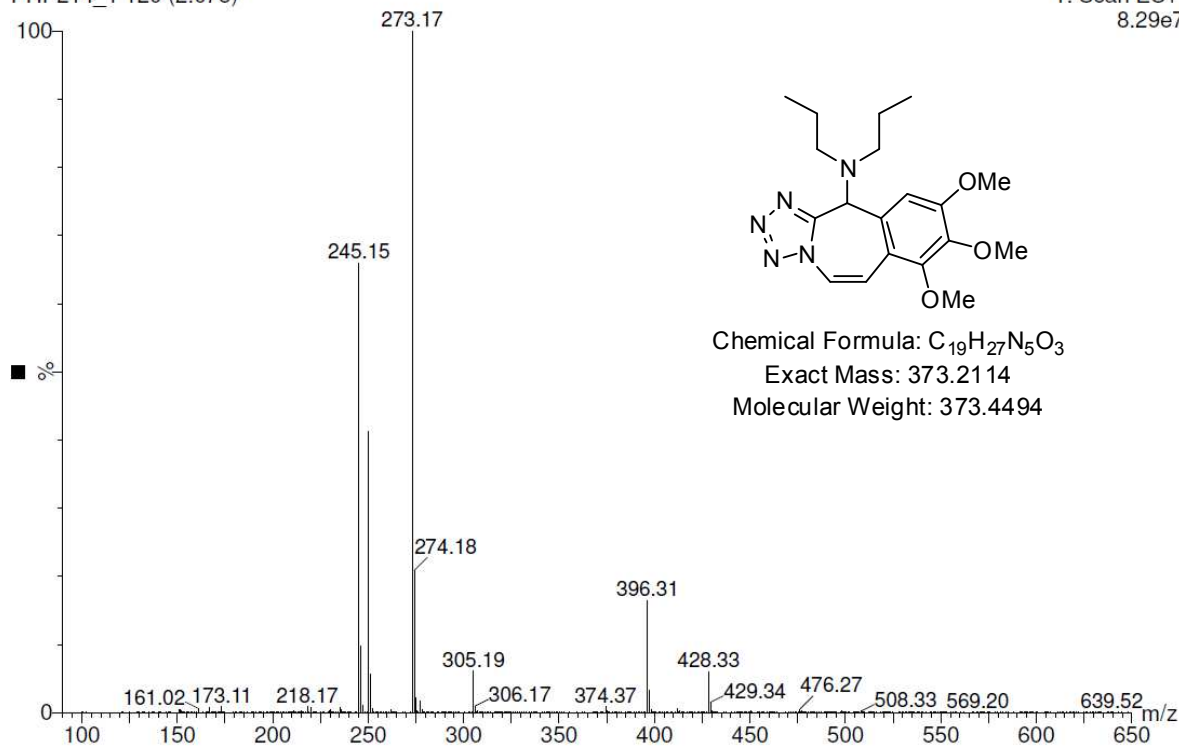

**11c: N-(4-chlorobenzyl)-1-(1-(2,2-dimethoxyethyl)-1H-tetrazol-5-yl)-1-(3,4,5-trimethoxyphenyl)methanamine.**

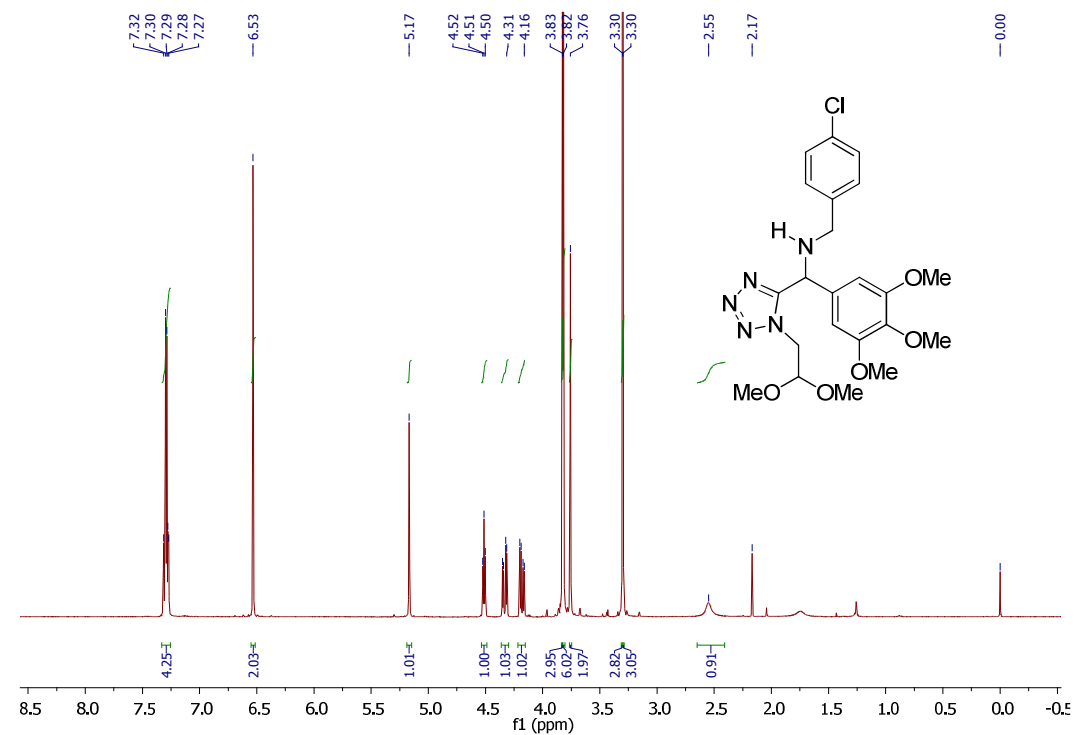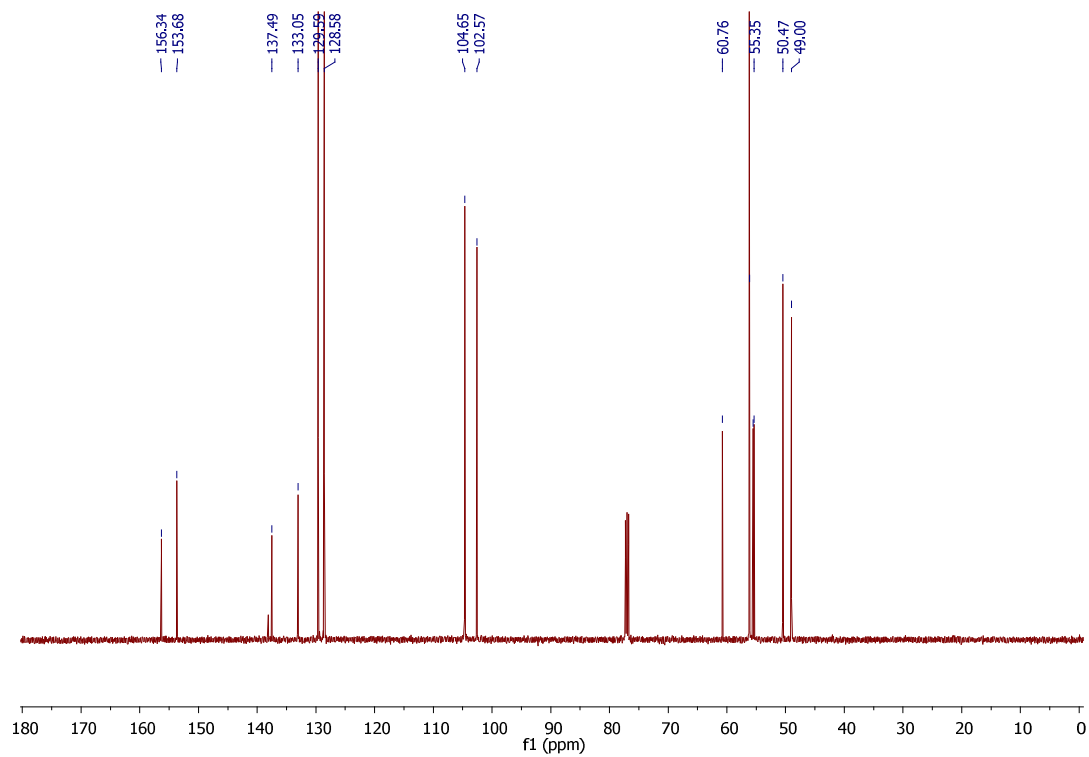

PHP213\_1\_Silica\_4.6X250\_MeOH\_5-30%\_6

PHP213\_1

3: Diode Array  
Range: 1.388e+1

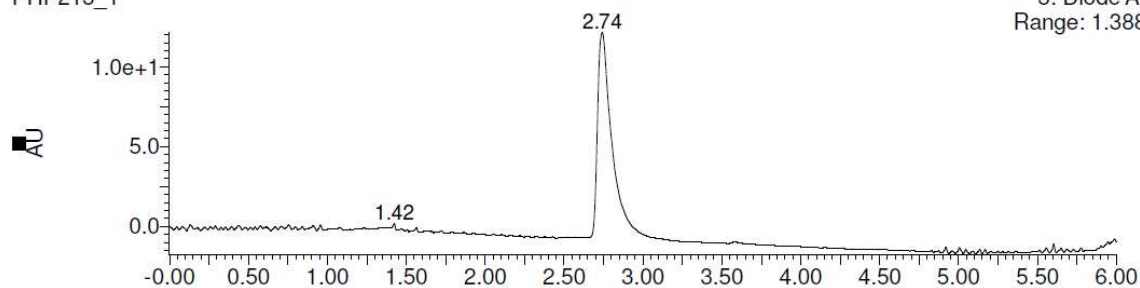

PHP213\_1

1: Scan ES+  
478  
8.00e6

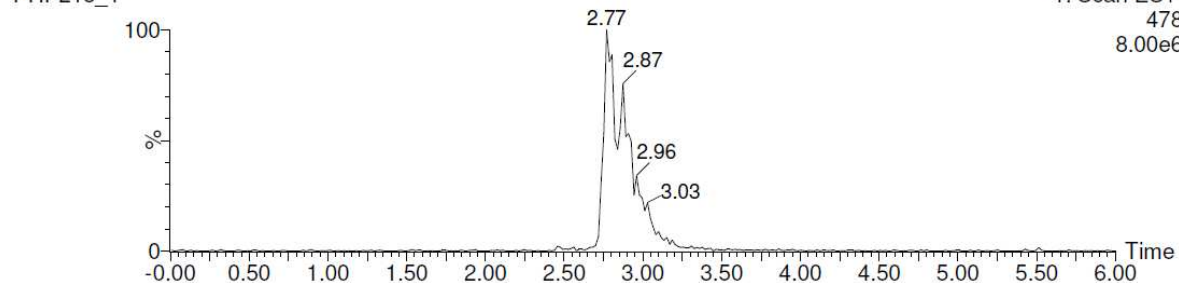

PHP213\_1\_Silica\_4.6X250\_MeOH\_5-30%\_6

PHP213\_1 162 (2.805)

1: Scan ES+  
7.57e7

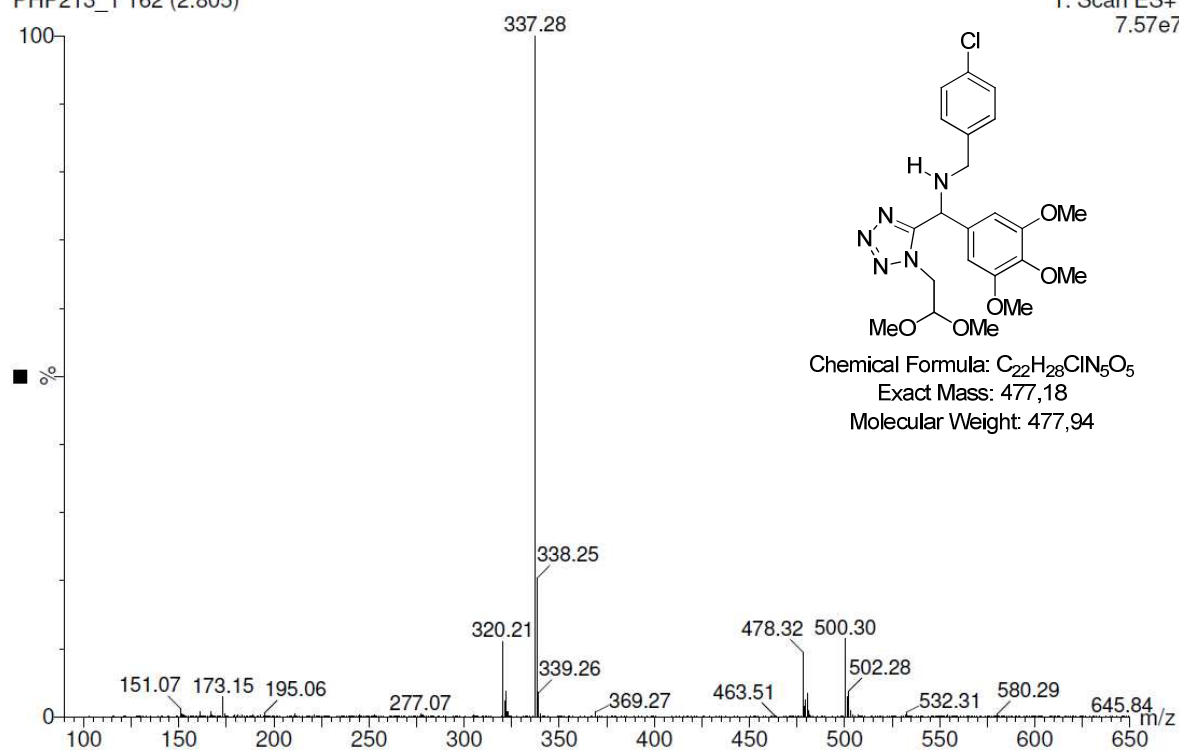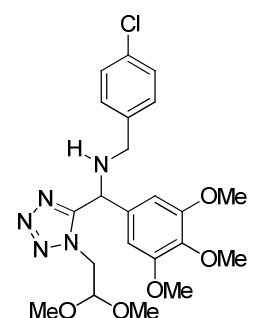

Chemical Formula: C<sub>22</sub>H<sub>28</sub>ClN<sub>5</sub>O<sub>5</sub>  
Exact Mass: 477,18  
Molecular Weight: 477,94

3c: N-(4-chlorobenzyl)-7,8,9-trimethoxy-11H-benzo[d]tetrazolo[1,5-a]azepin-11-amine.

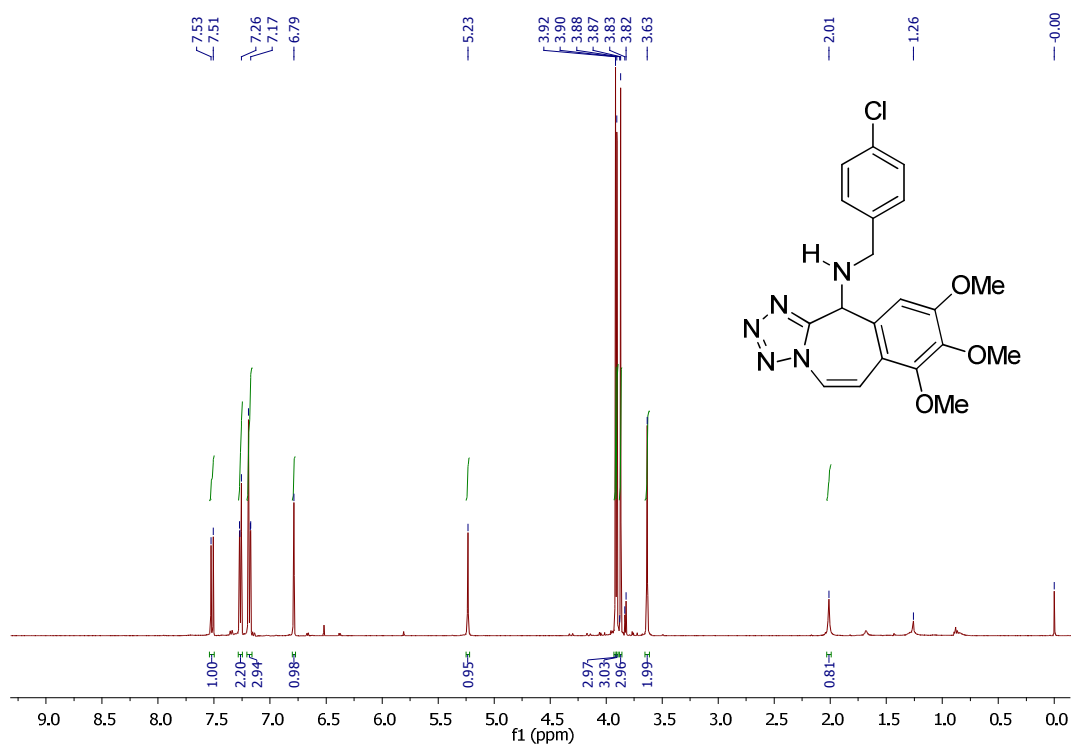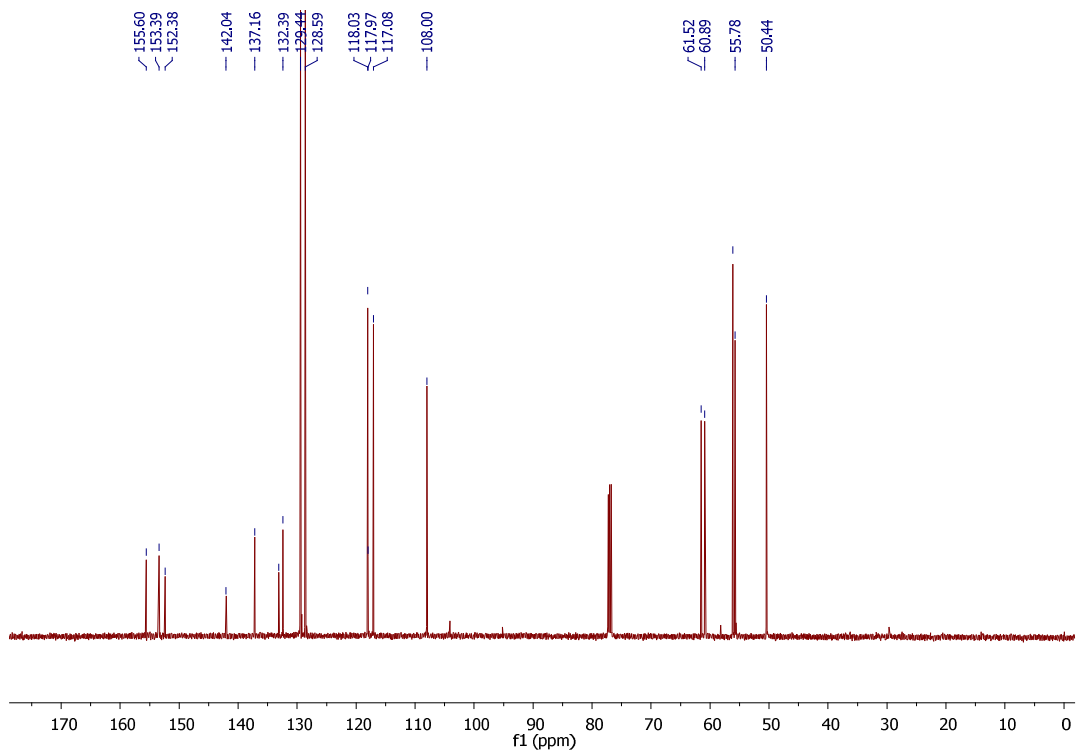

PHP267\_1\_Silica\_4.6X250\_MeOH\_5-30%\_6

PHP267\_1

3: Diode Array  
Range: 1.423e+1

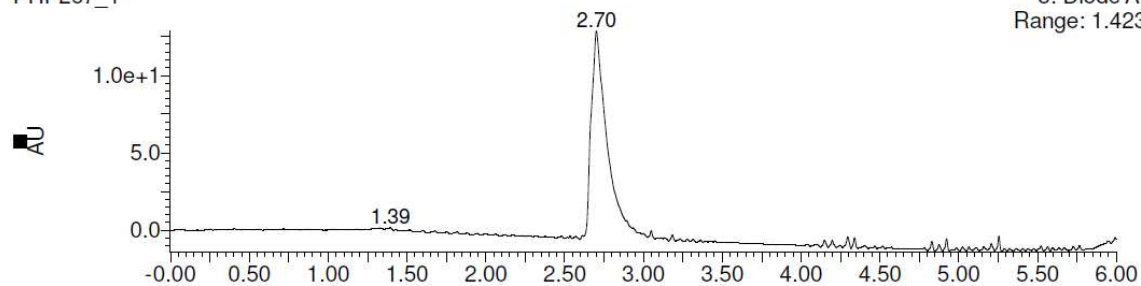

PHP267\_1

2: Scan ES-  
412  
3.17e5

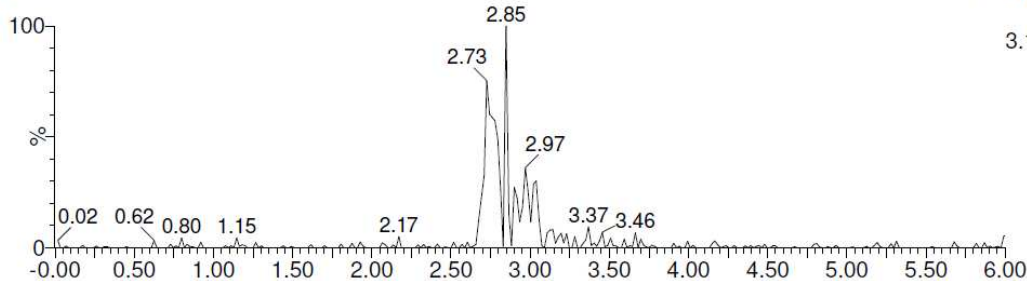

PHP267\_1\_Silica\_4.6X250\_MeOH\_5-30%\_6

PHP267\_1 158 (2.744)

2: Scan ES-  
1.55e5

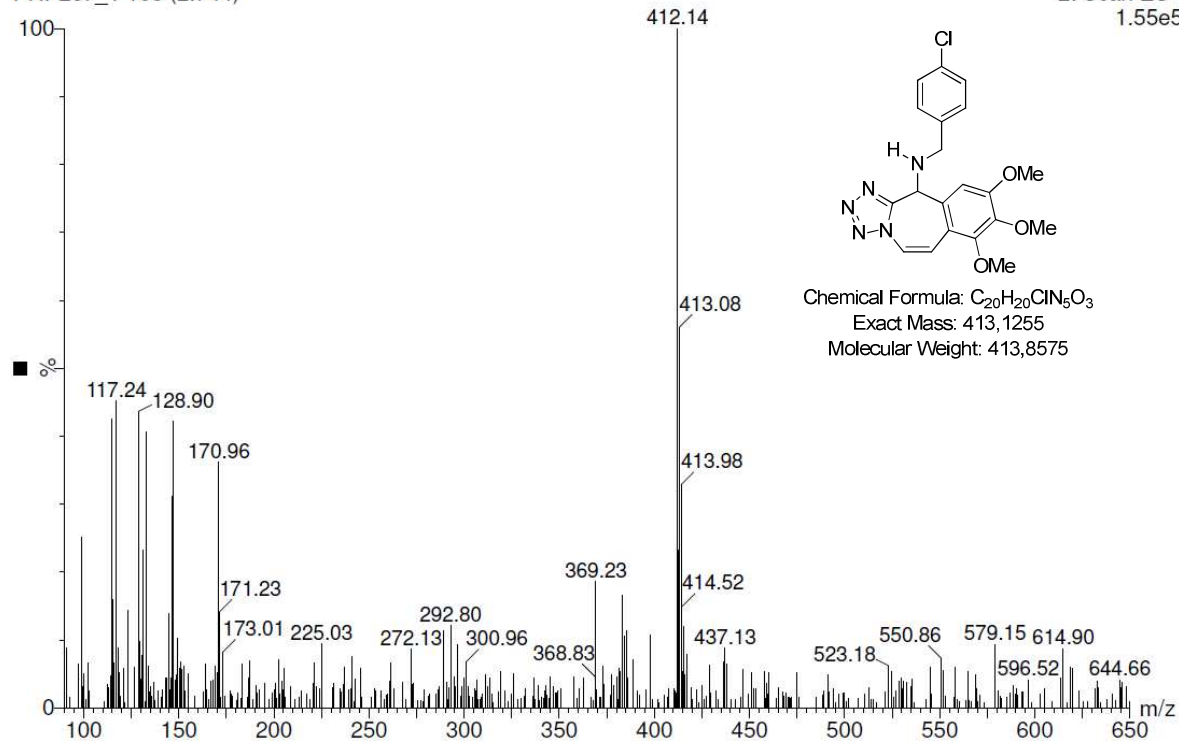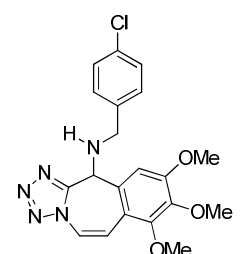

Chemical Formula: C<sub>20</sub>H<sub>20</sub>ClN<sub>5</sub>O<sub>3</sub>  
Exact Mass: 413,1255  
Molecular Weight: 413,8575



**11d: N-((1-(2,2-dimethoxyethyl)-1H-tetrazol-5-yl)(3,4,5-trimethoxyphenyl)methyl) prop-2-en-1-amine.**

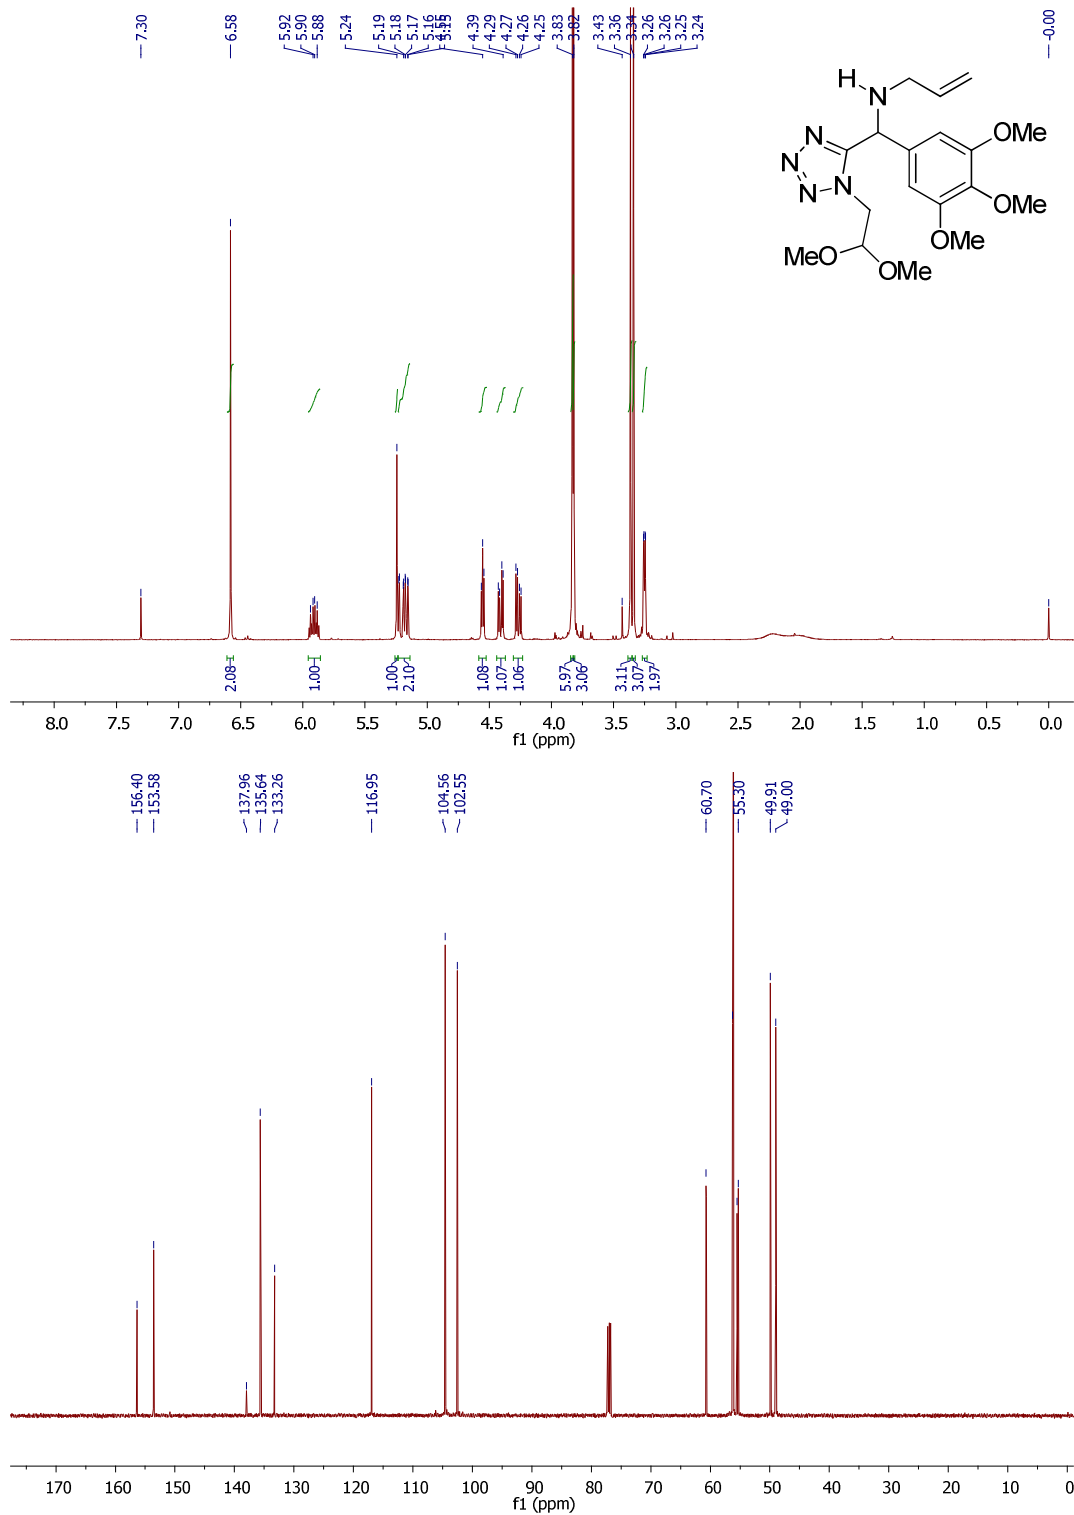

PHP271\_1\_Silica\_4.6X250\_MeOH\_5-30%\_6

PHP271\_1

3: Diode Array  
Range: 1.359e+1

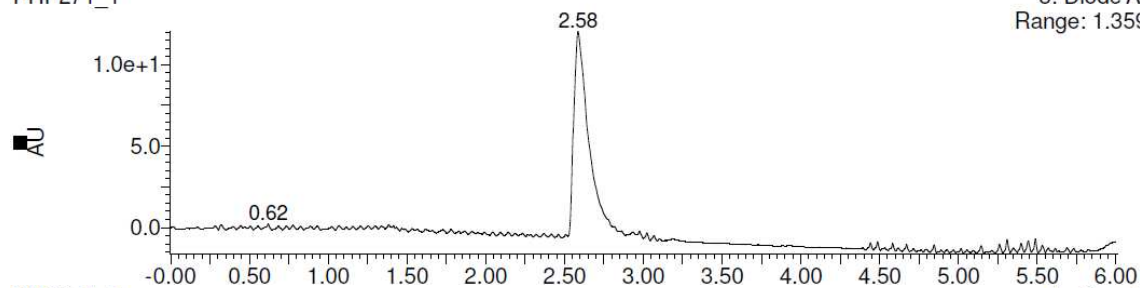

PHP271\_1

1: Scan ES+  
394  
3.68e7

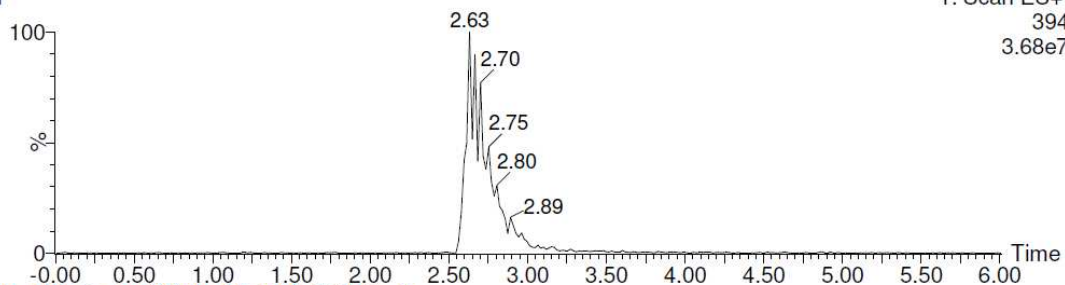

PHP271\_1\_Silica\_4.6X250\_MeOH\_5-30%\_6

PHP271\_1 152 (2.631)

1: Scan ES+  
8.45e7

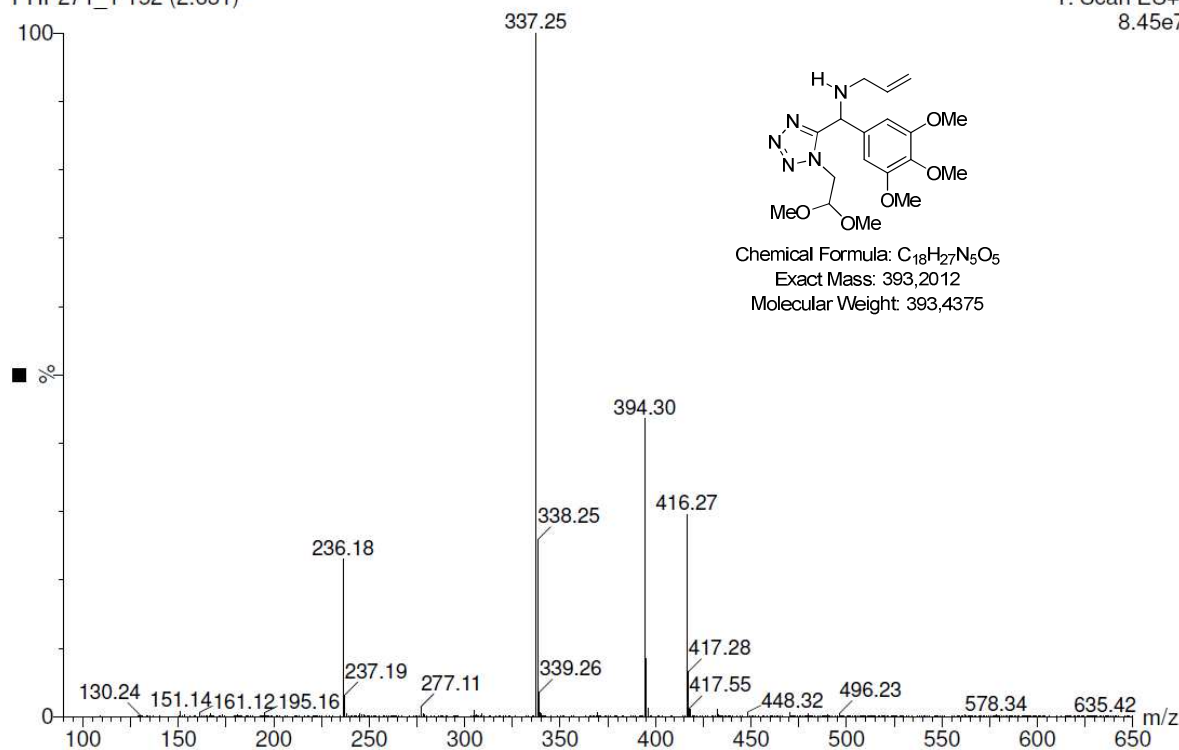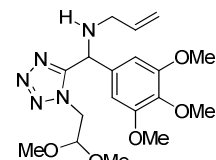

Chemical Formula: C<sub>18</sub>H<sub>27</sub>N<sub>5</sub>O<sub>5</sub>  
Exact Mass: 393,2012  
Molecular Weight: 393,4375

**3d: N-allyl-7,8,9-trimethoxy-11H-benzo[d]tetrazolo[1,5-a]azepin-11-amine.**

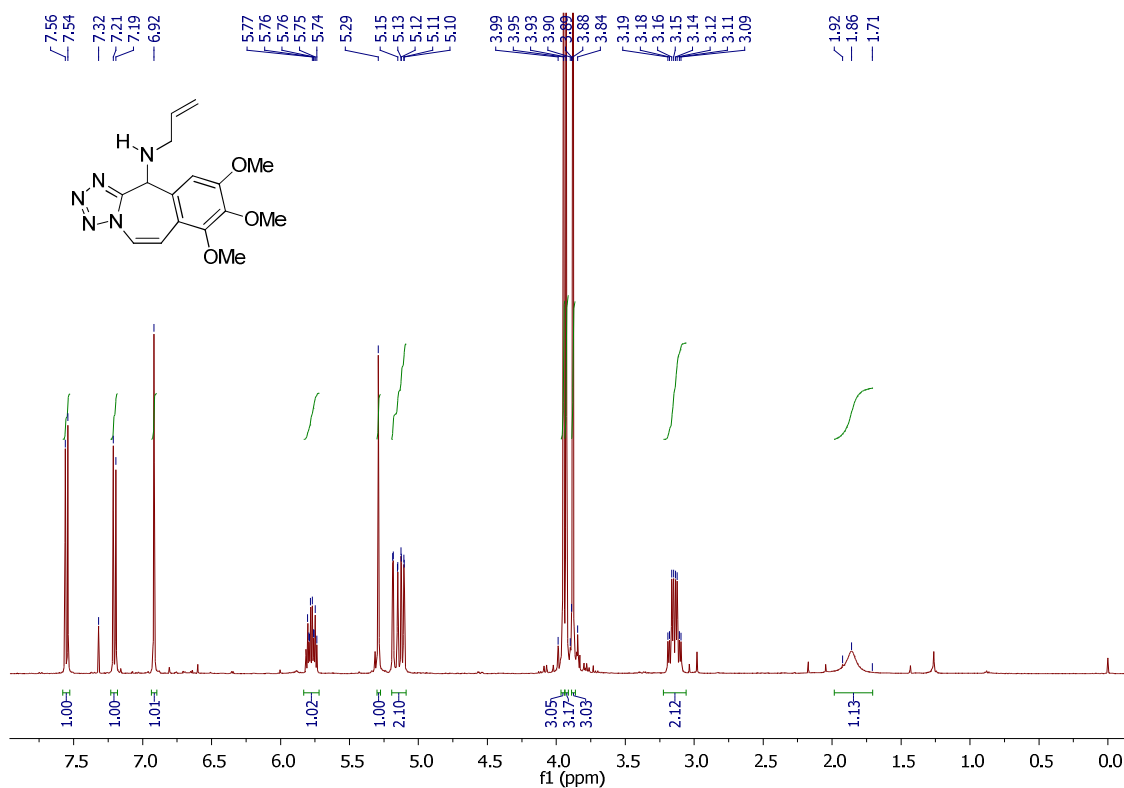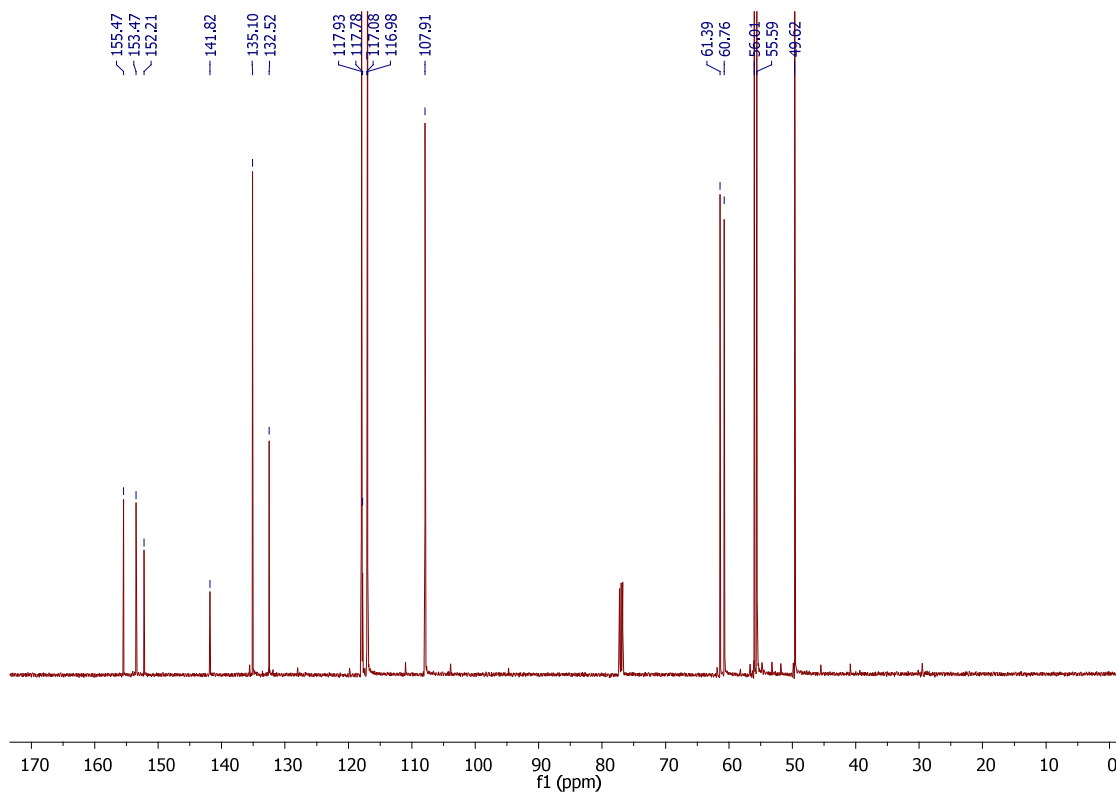

PHP215\_1\_Silica\_4.6X250\_MeOH\_5-30%\_6

PHP215\_1

3: Diode Array  
Range: 8.128e+1

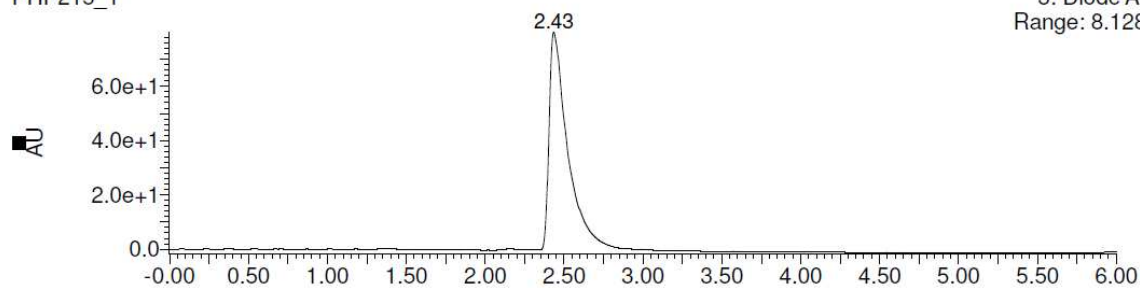

PHP215\_1

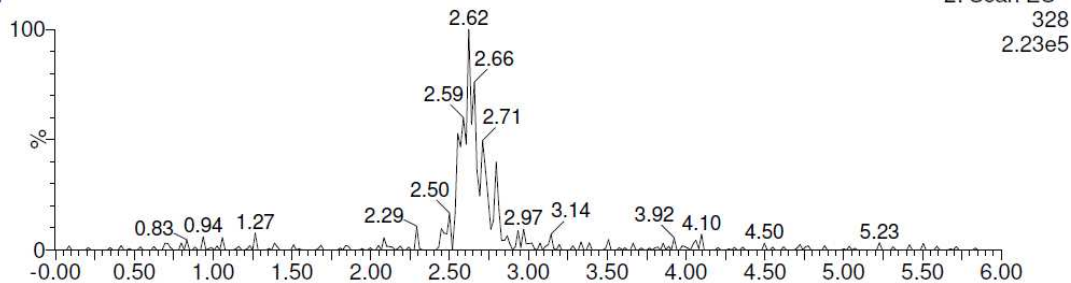

2: Scan ES-  
328  
2.23e5

PHP215\_1\_Silica\_4.6X250\_MeOH\_5-30%\_6

PHP215\_1 149 (2.587)

2: Scan ES-  
1.23e5

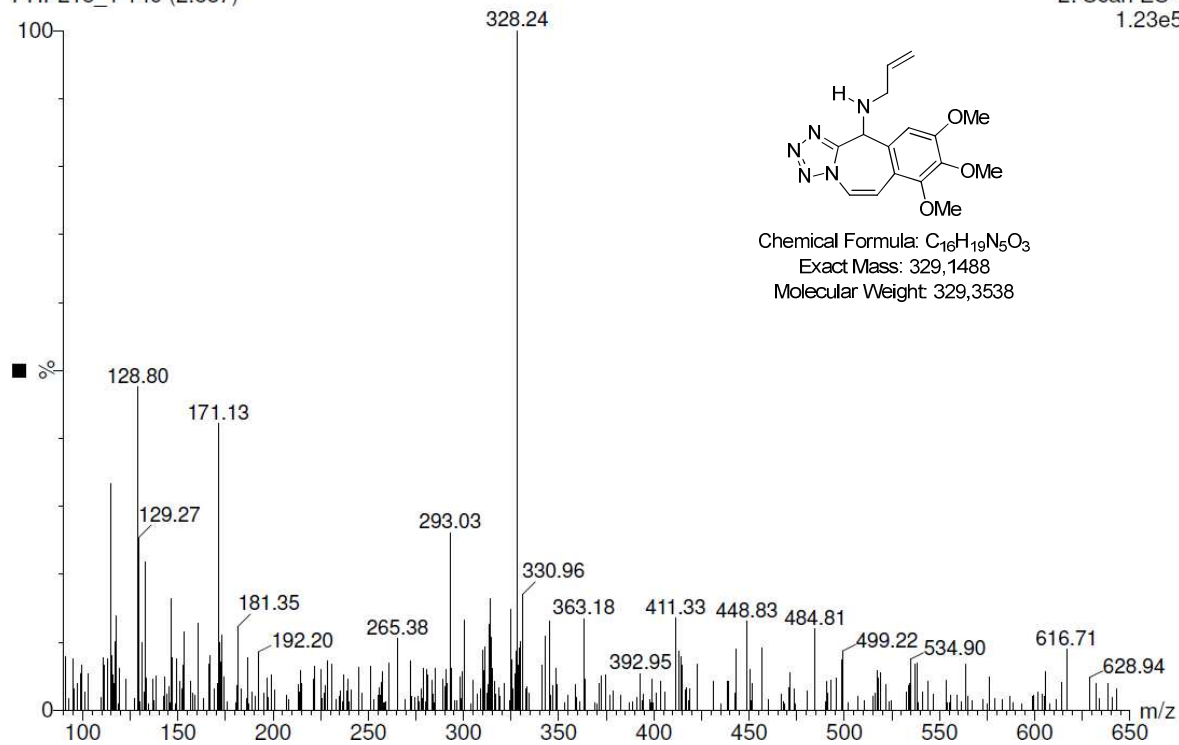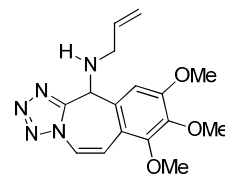

Chemical Formula: C<sub>16</sub>H<sub>19</sub>N<sub>5</sub>O<sub>3</sub>  
Exact Mass: 329,1488  
Molecular Weight: 329,3538

**11e: N-((1-(2,2-dimethoxyethyl)-1H-tetrazol-5-yl)(3,5-dimethoxyphenyl)methyl)prop-2-en-1-amine.**

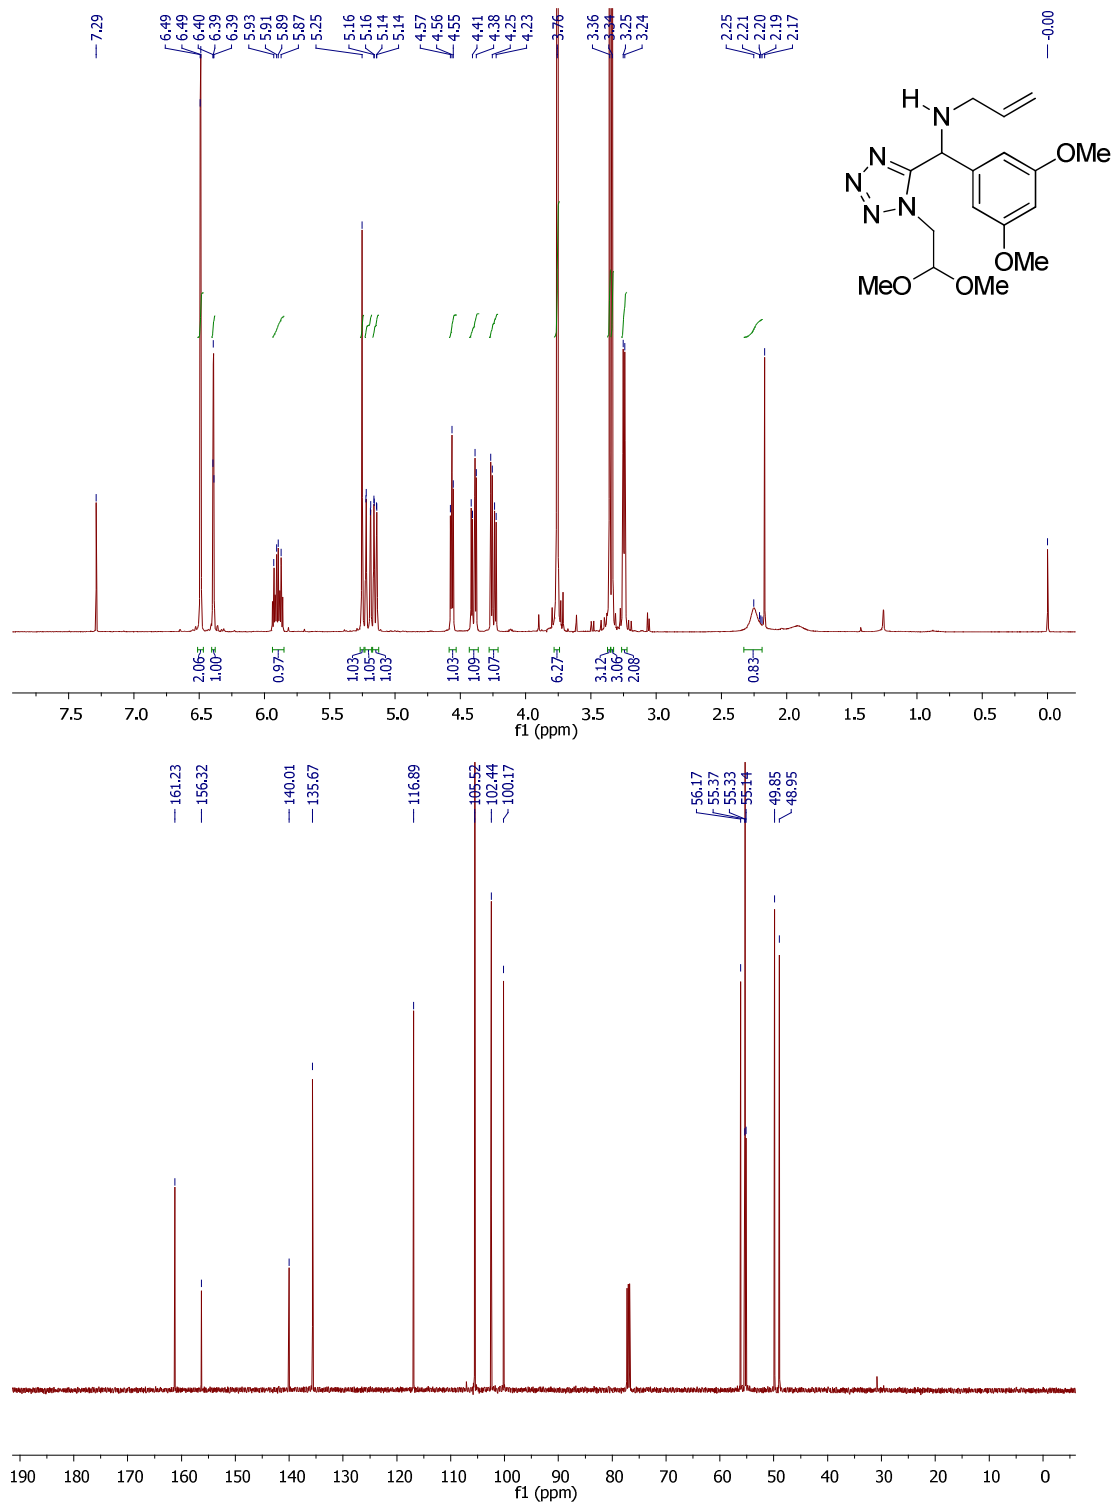

PHP298\_1\_Silica\_4.6X250\_MeOH\_5-30%\_6

PHP298\_1

3: Diode Array  
Range: 1.234e+1

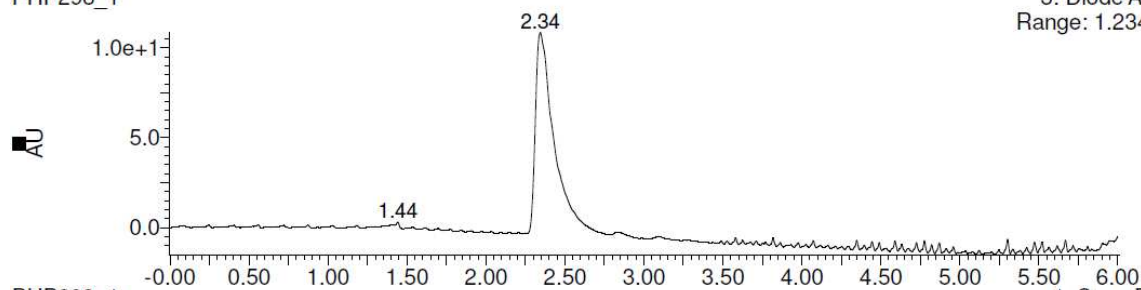

PHP298\_1

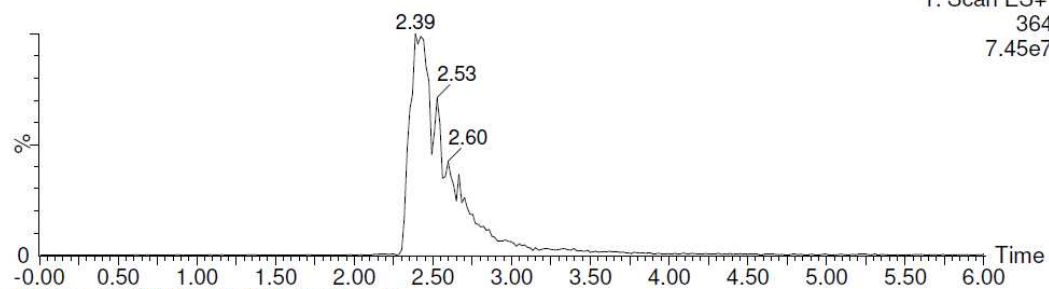

1: Scan ES+  
364  
7.45e7

PHP298\_1\_Silica\_4.6X250\_MeOH\_5-30%\_6

PHP298\_1 139 (2.405)

1: Scan ES+  
7.94e7

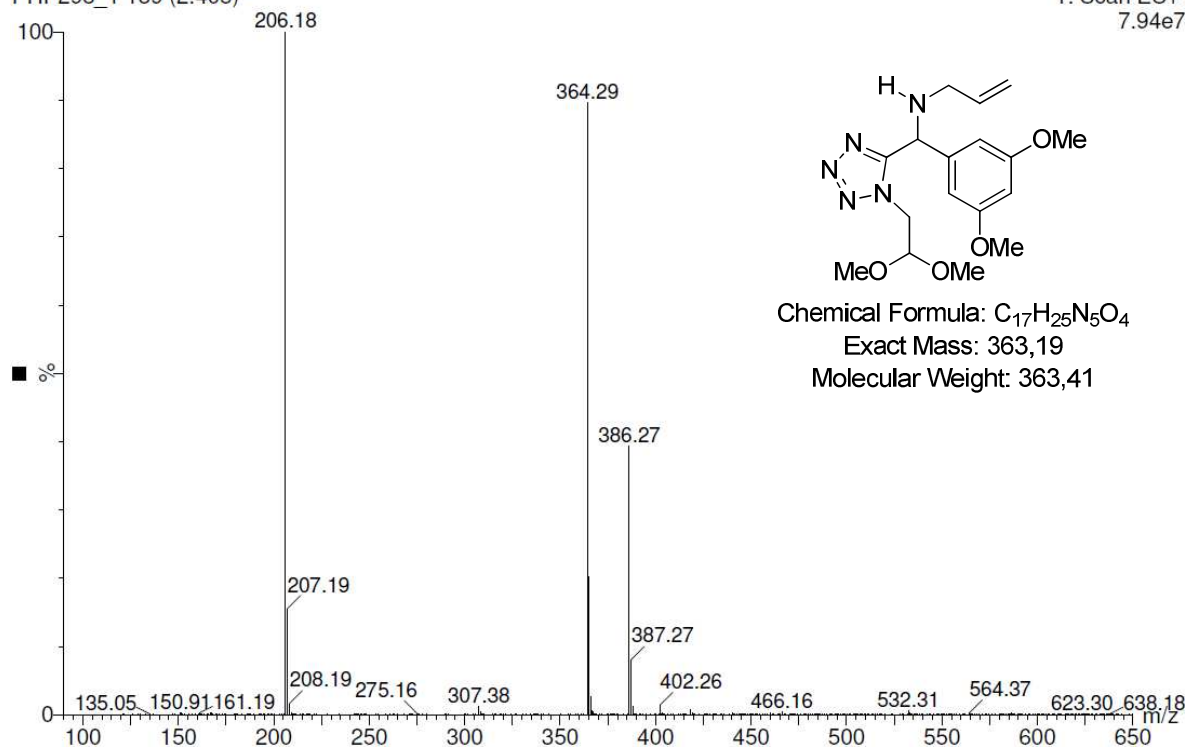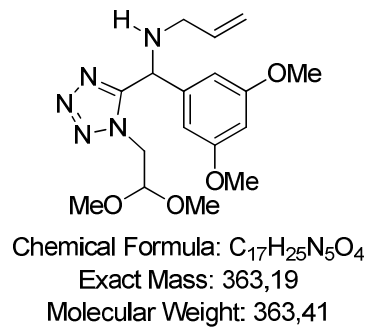

**3e: N-allyl-7,9-dimethoxy-11H-benzo[d]tetrazolo[1,5-a]azepin-11-amine.**

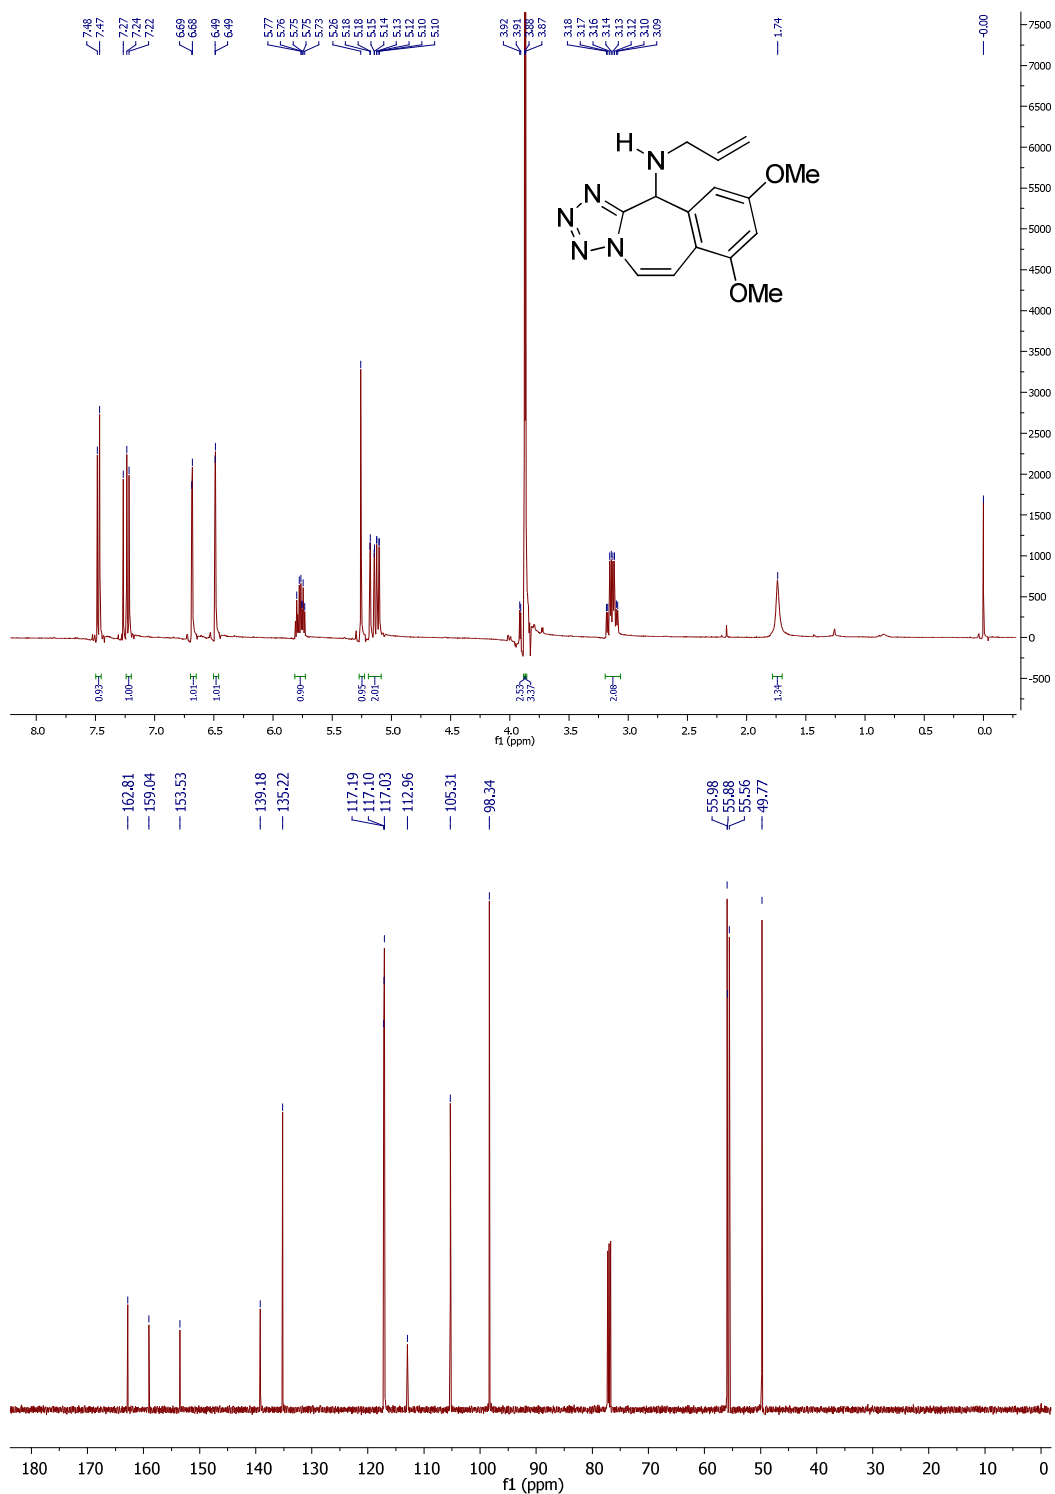

PHP306\_1\_Silica\_4.6X250\_MeOH\_5-30%\_6

PHP306\_1

3: Diode Array  
Range: 2.281e+1

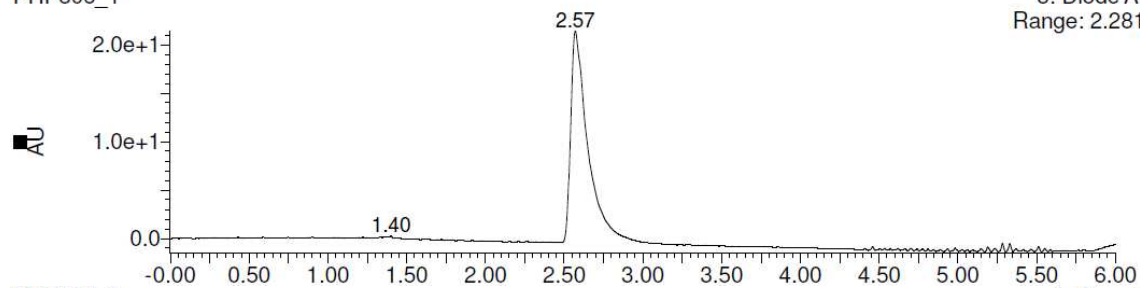

PHP306\_1

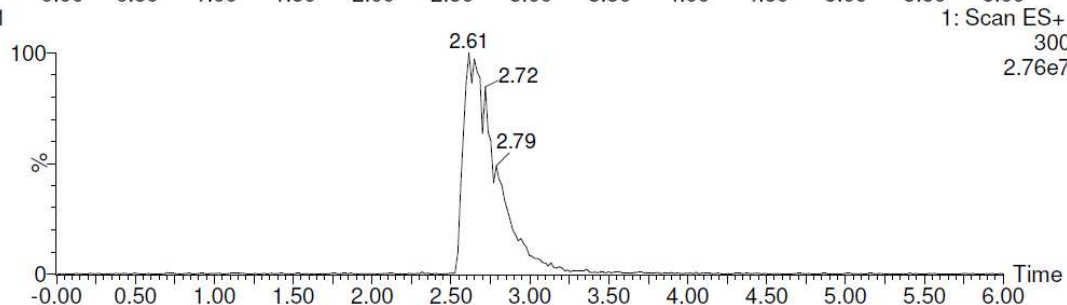

1: Scan ES+  
300  
2.76e7

PHP306\_1\_Silica\_4.6X250\_MeOH\_5-30%\_6

PHP306\_1 149 (2.579)

1: Scan ES+  
5.57e7

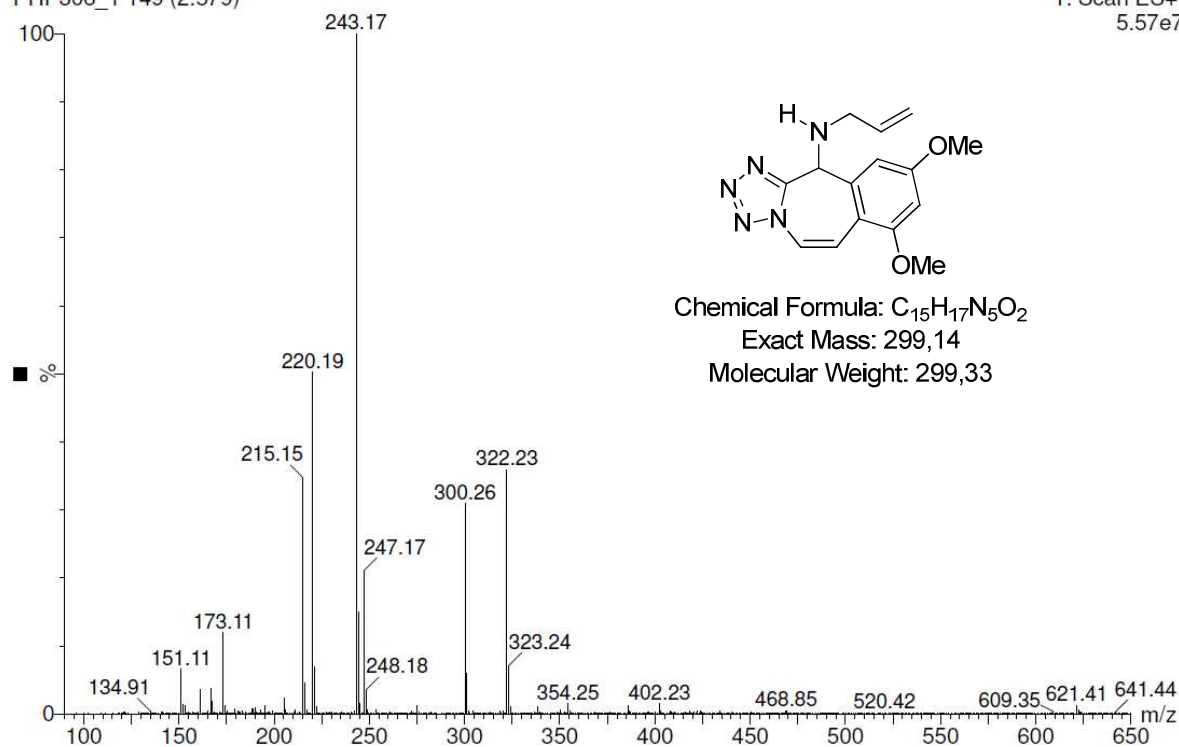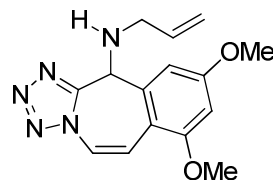

Chemical Formula: C<sub>15</sub>H<sub>17</sub>N<sub>5</sub>O<sub>2</sub>

Exact Mass: 299,14

Molecular Weight: 299,33



**11f: 2-(3-chlorophenyl)-N-((1-(2,2-dimethoxyethyl)-1H-tetrazol-5-yl)(3,5-dimethoxyphenyl)methyl)ethanamine.**

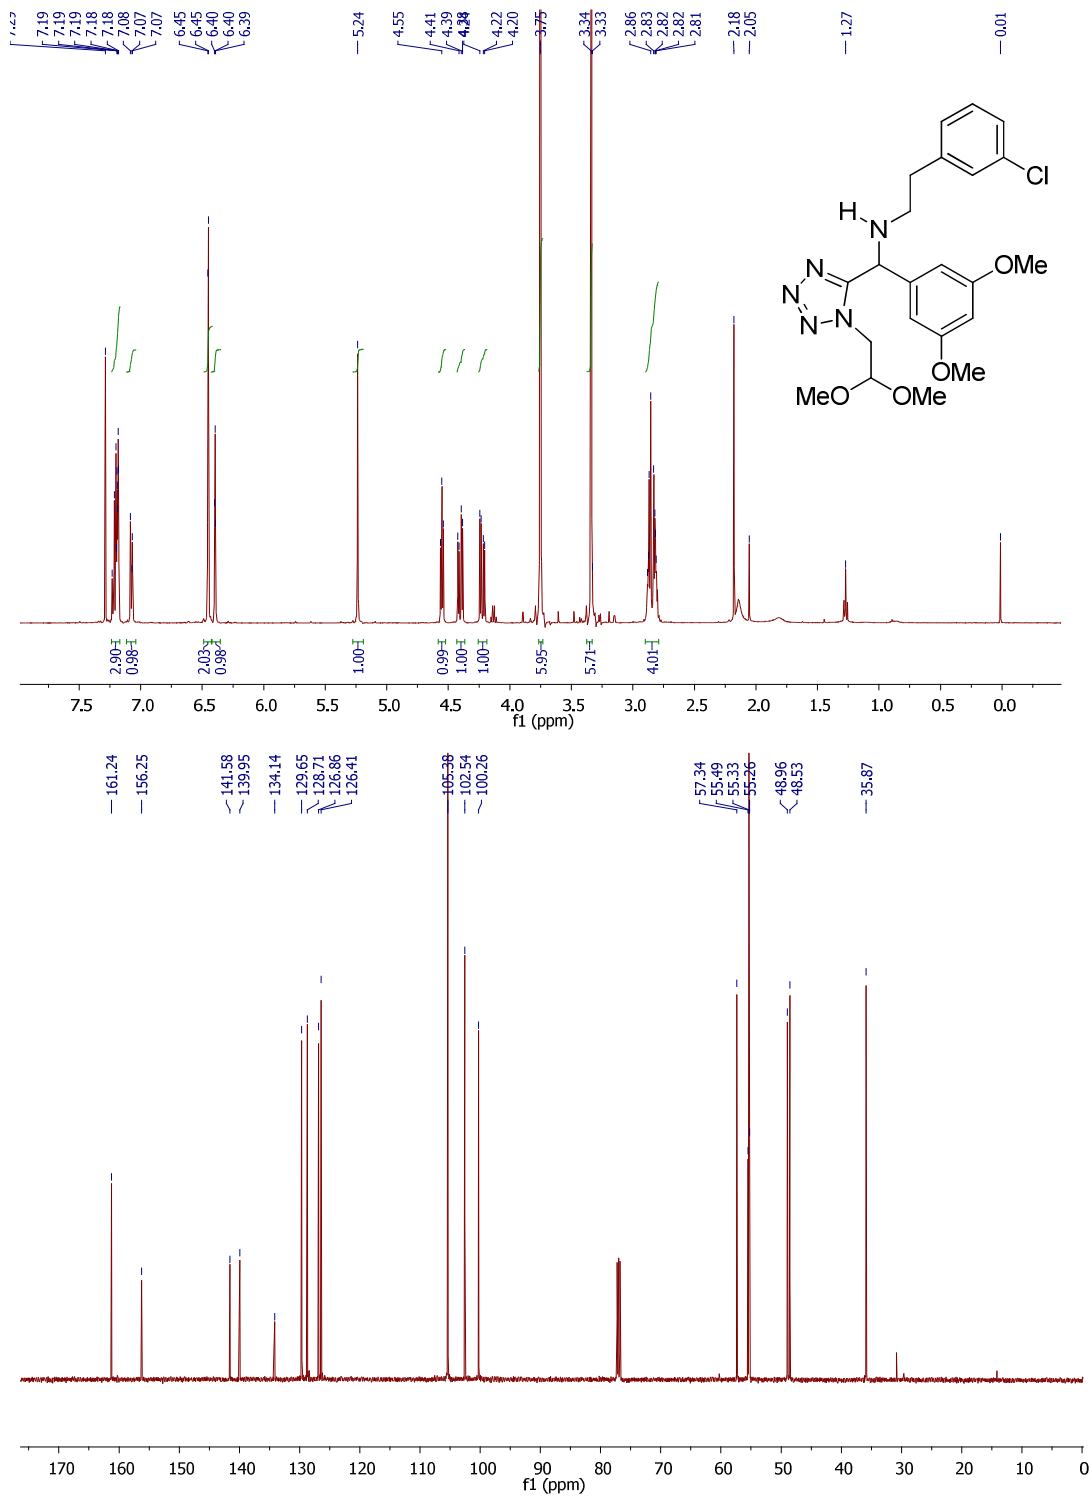

PHP299\_1\_Silica\_4.6X250\_MeOH\_5-30%\_6

PHP299

3: Diode Array  
Range: 7.903

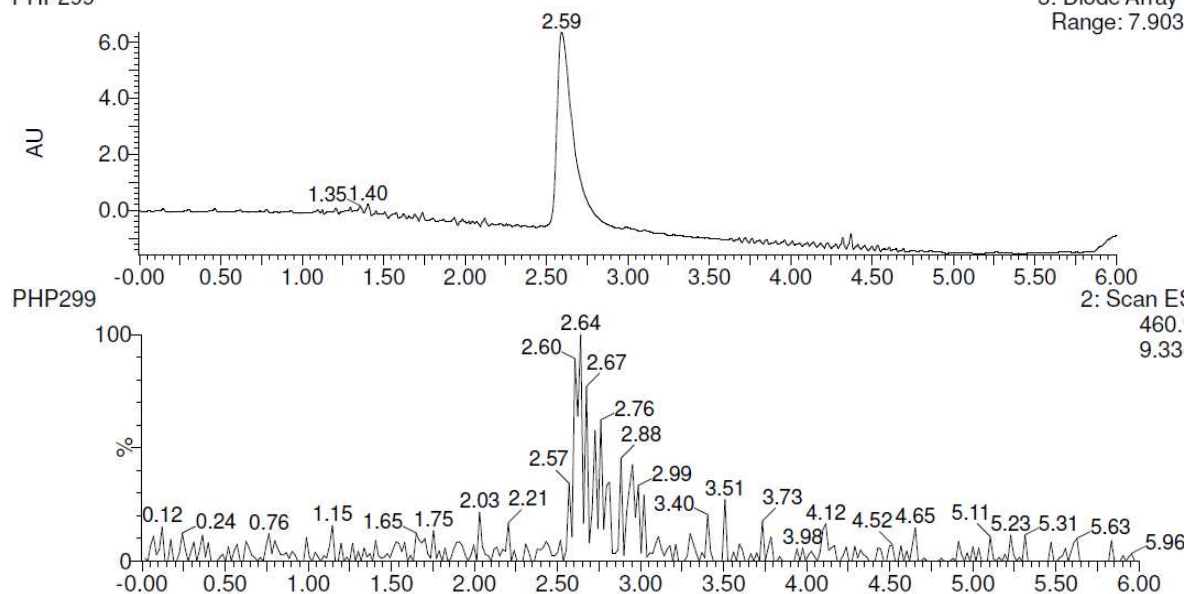

PHP299\_1\_Silica\_4.6X250\_MeOH\_5-30%\_6

PHP299 151 (2.622)

2: Scan ES-  
1.93e5

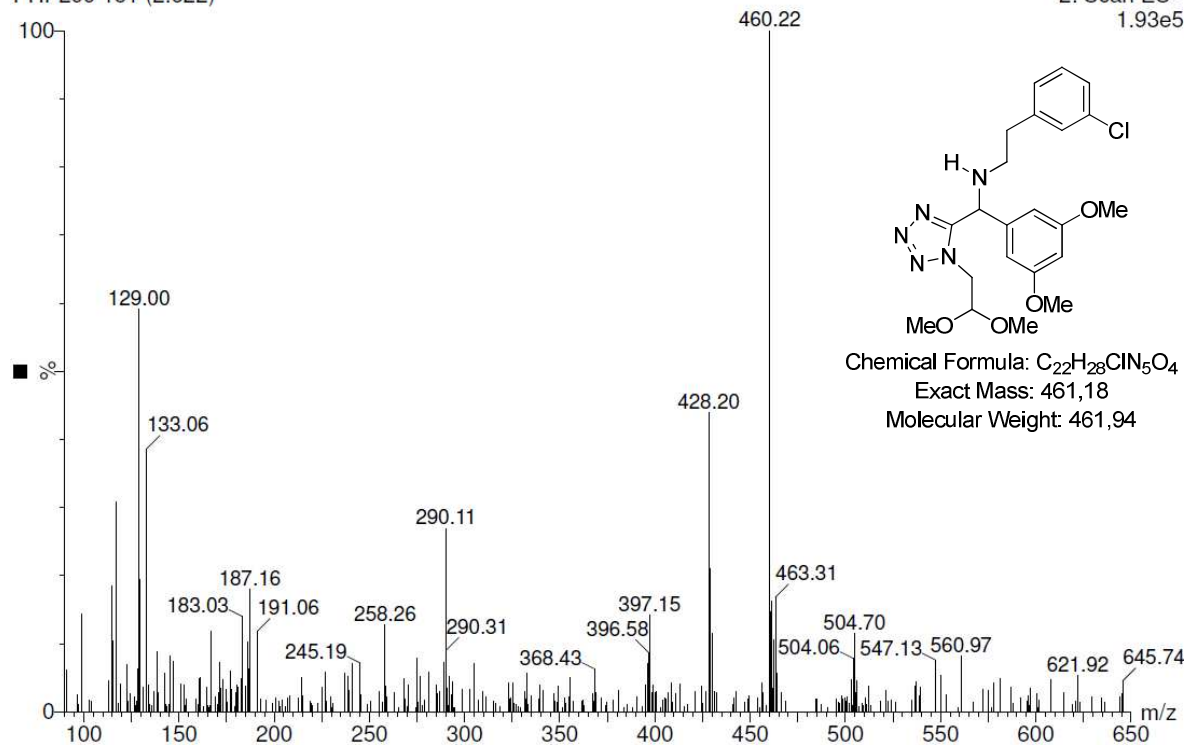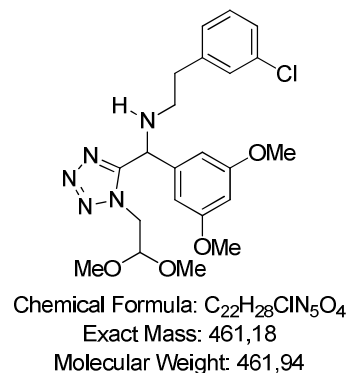

**3f: N-(3-chlorophenethyl)-7,9-dimethoxy-11H-benzo[d]tetrazolo[1,5-a]azepin-11-amine.**

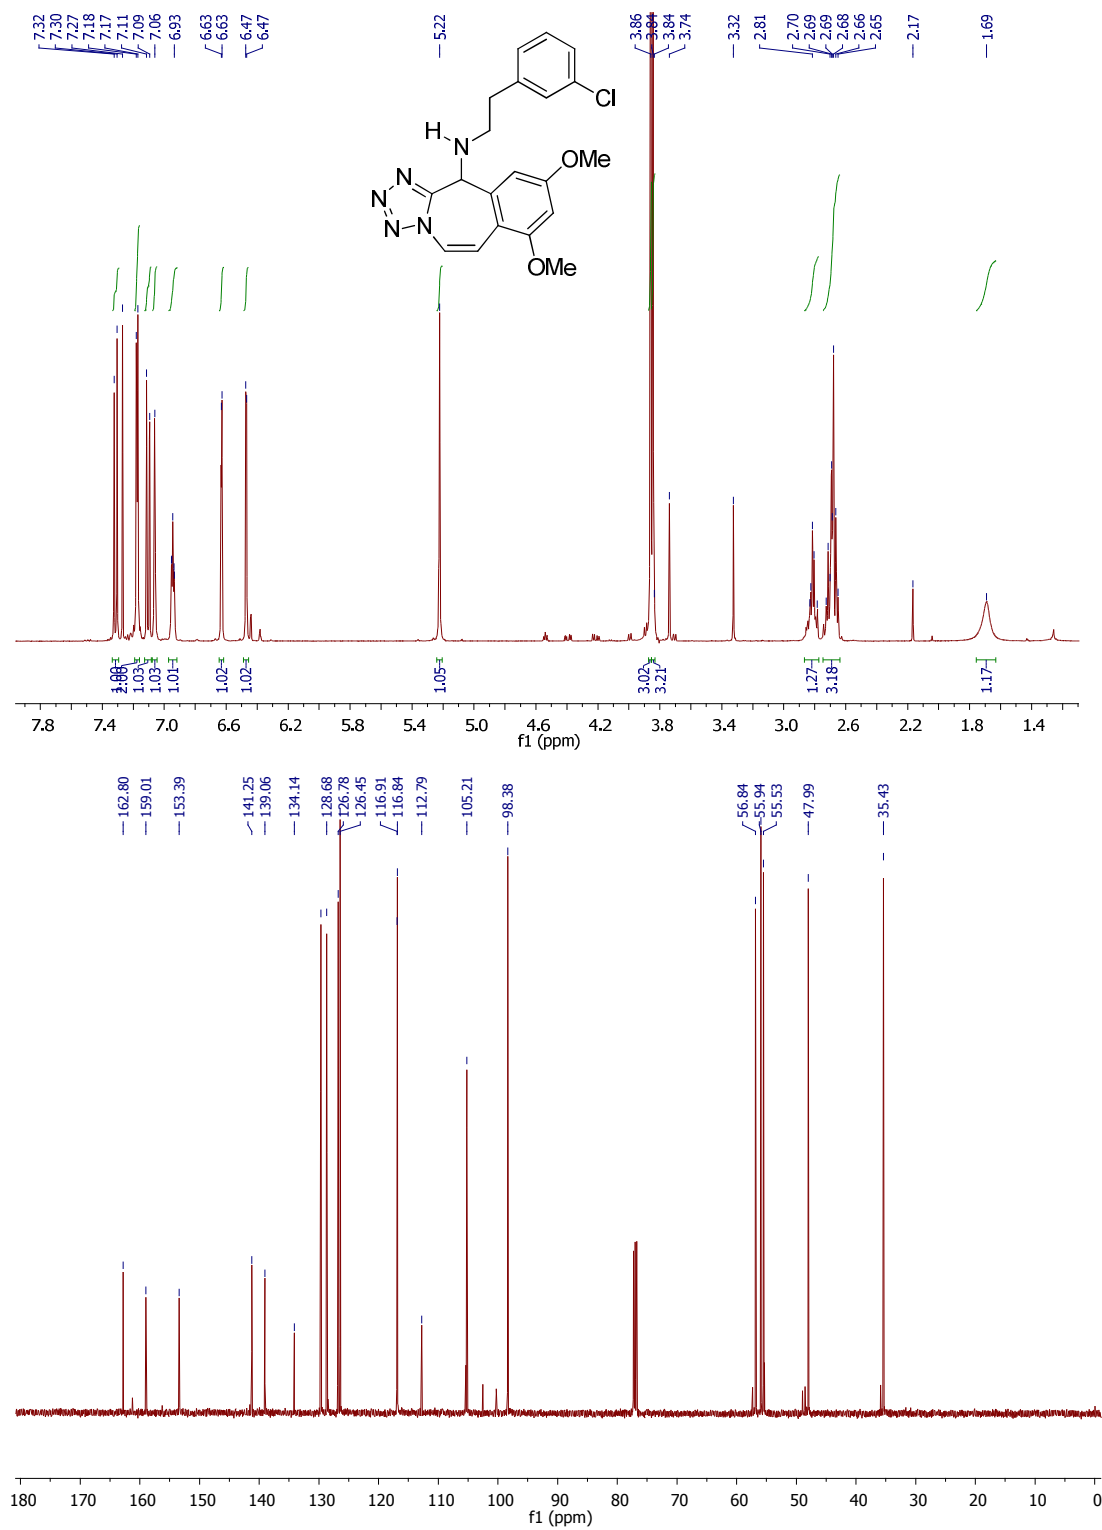

PHP307\_1\_Silica\_4.6X250\_MeOH\_5-30%\_6

PHP307\_1

3: Diode Array  
Range: 2.44e+1

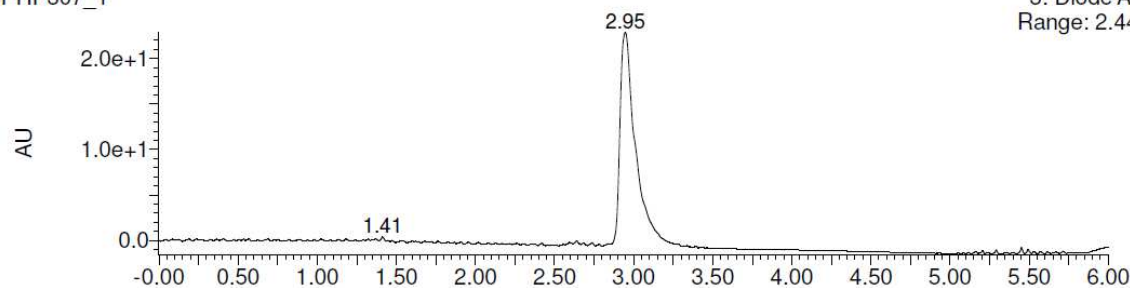

PHP307\_1

2: Scan ES-  
396  
1.44e5

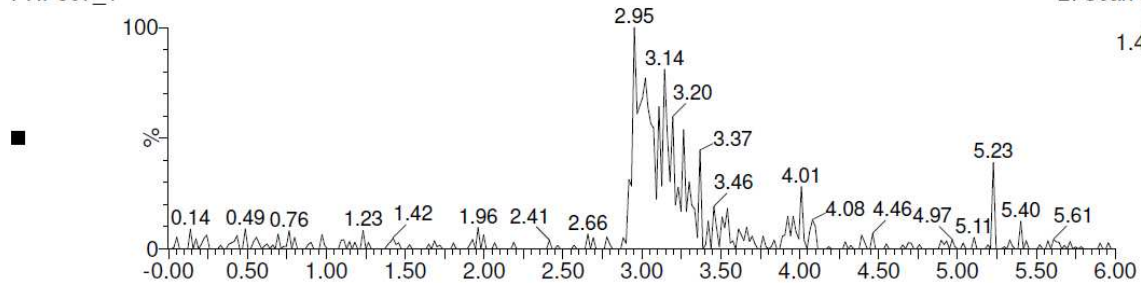

PHP307\_1\_Silica\_4.6X250\_MeOH\_5-30%\_6

PHP307\_1 170 (2.952)

2: Scan ES-  
1.04e5

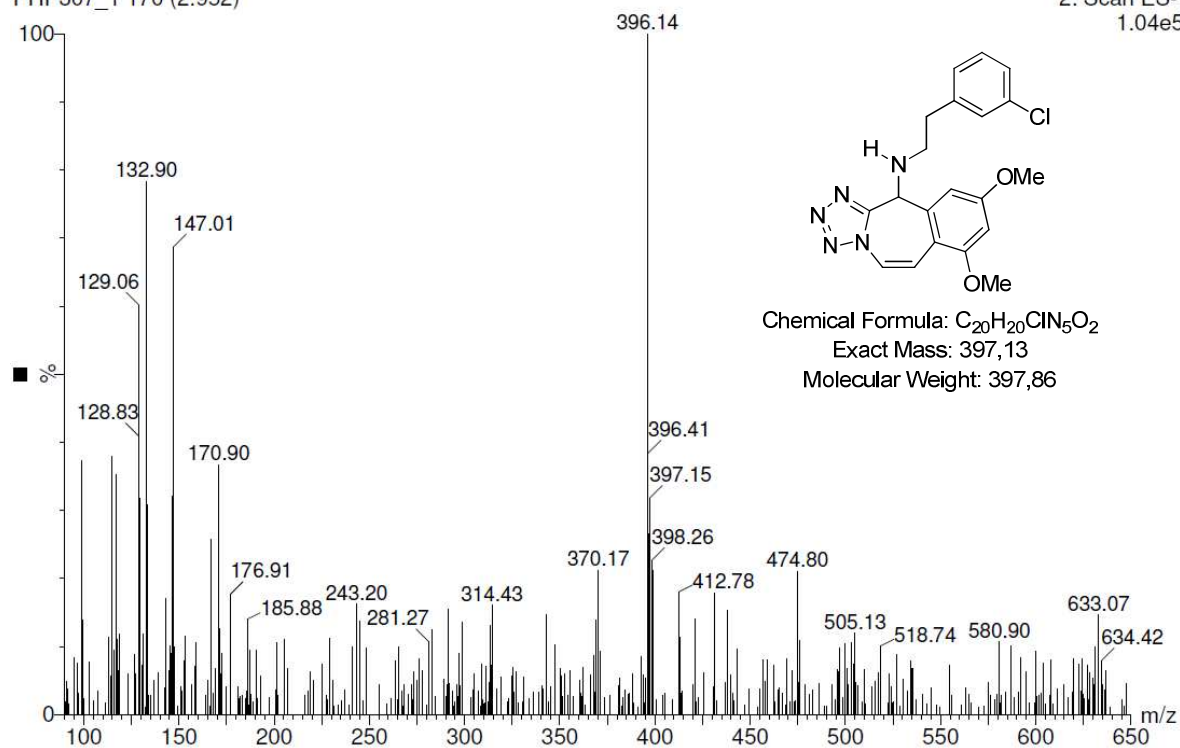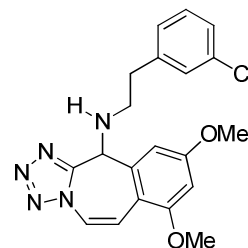

Chemical Formula: C<sub>20</sub>H<sub>20</sub>ClN<sub>5</sub>O<sub>2</sub>  
Exact Mass: 397,13  
Molecular Weight: 397,86

**11g: 4-benzyl-1-((1-(2,2-dimethoxyethyl)-1H-tetrazol-5-yl)(3,5-dimethoxyphenyl)methyl)piperidine.**

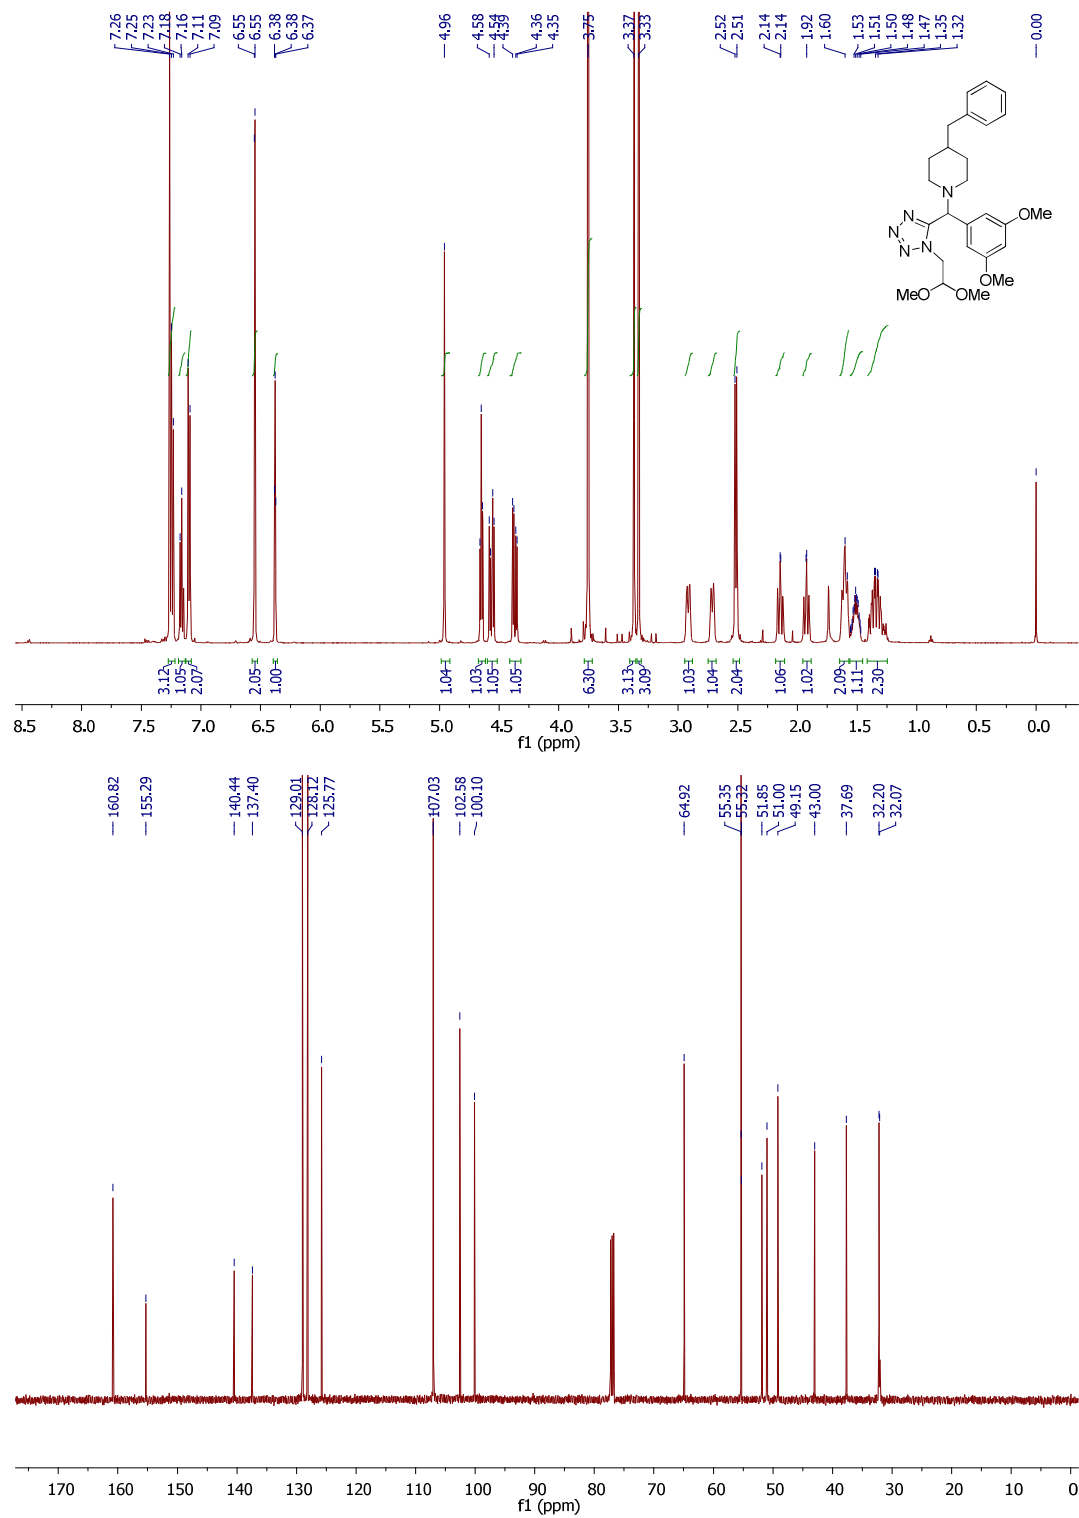

PHP297\_1\_Silica\_4.6X250\_MeOH\_5-30%\_6

PHP297\_1

3: Diode Array  
Range: 9.746

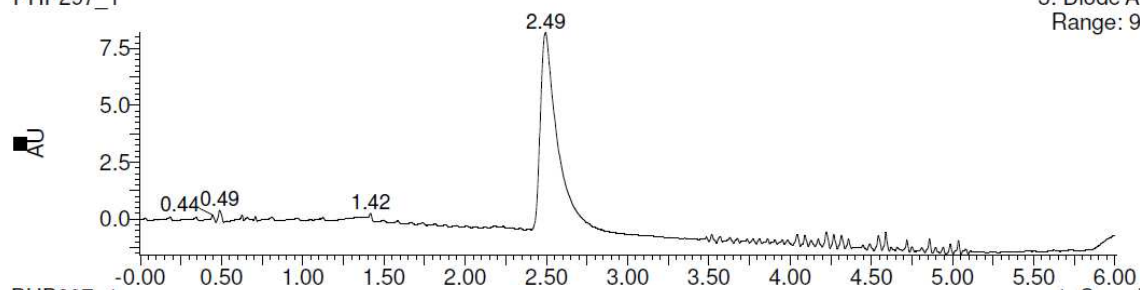

PHP297\_1

1: Scan ES+  
483  
2.35e7

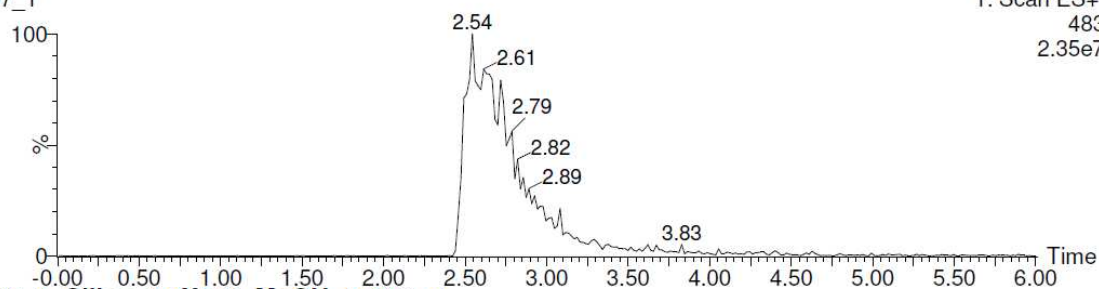

PHP297\_1\_Silica\_4.6X250\_MeOH\_5-30%\_6

PHP297\_1 145 (2.509)

1: Scan ES+  
5.44e7

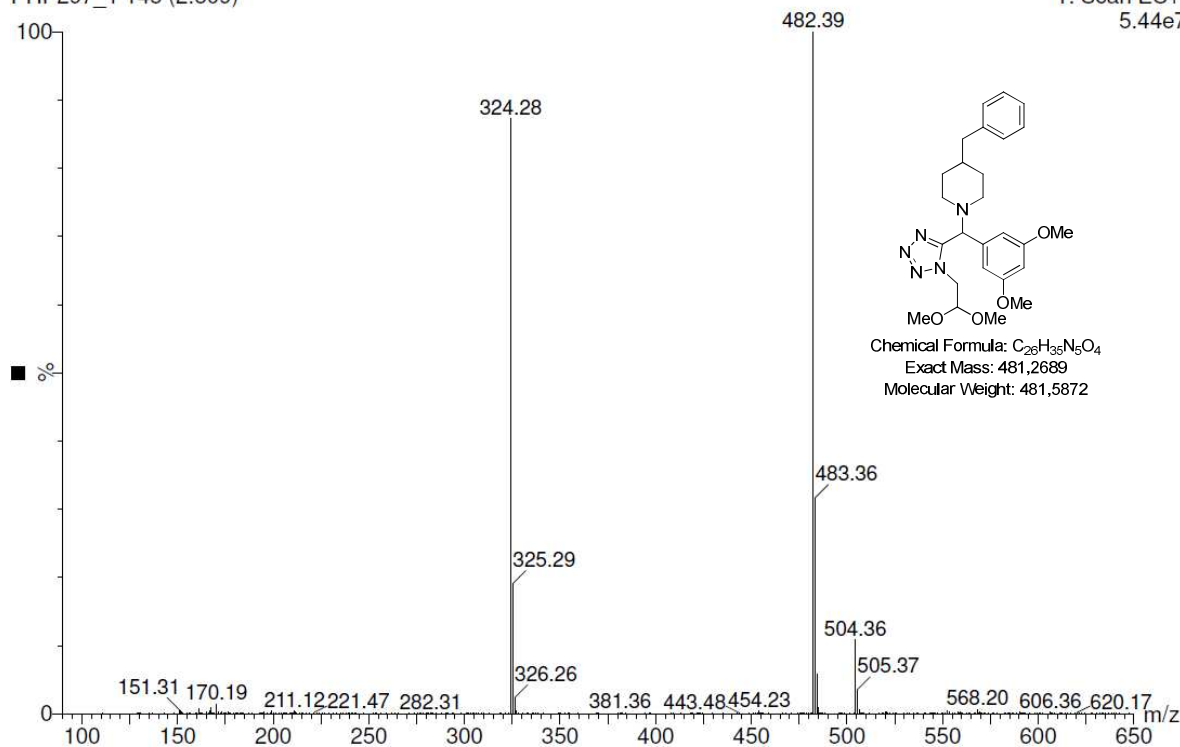

**3g: 11-(4-benzylpiperidin-1-yl)-7,9-dimethoxy-11H-benzo[d]tetrazolo[1,5-a]azepine.**

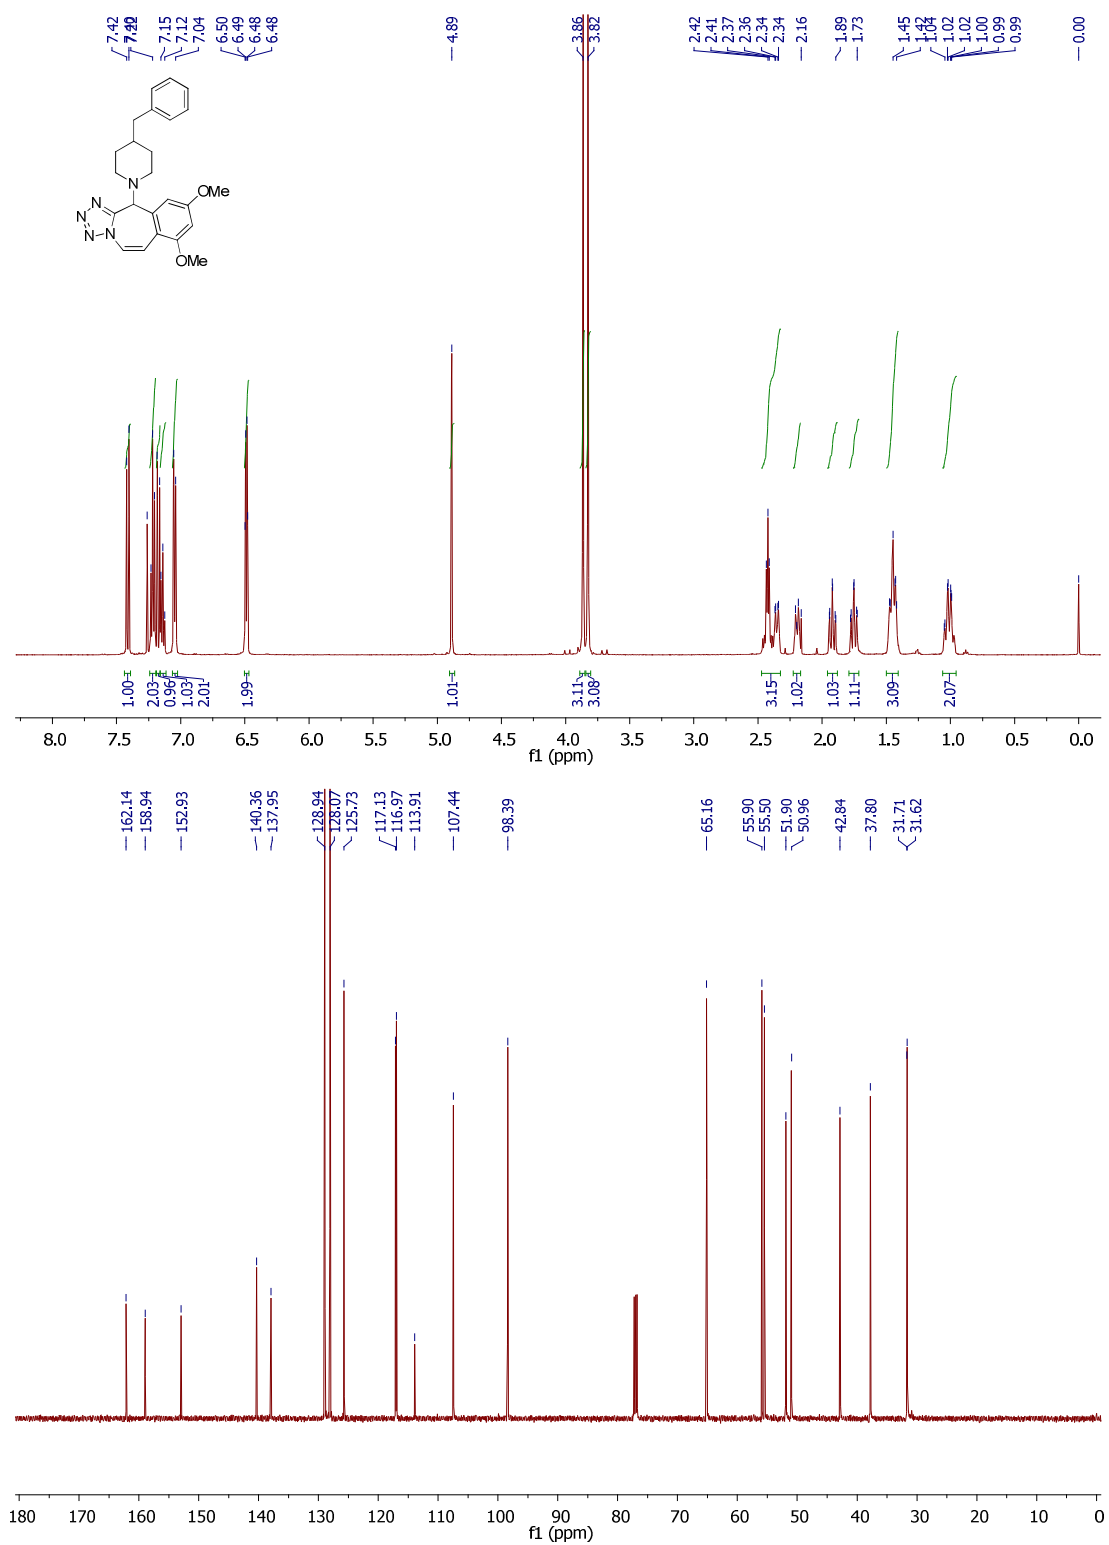

PHP305\_1\_Silica\_4.6X250\_MeOH\_5-30%\_6

PHP305\_1

3: Diode Array  
Range: 9.149

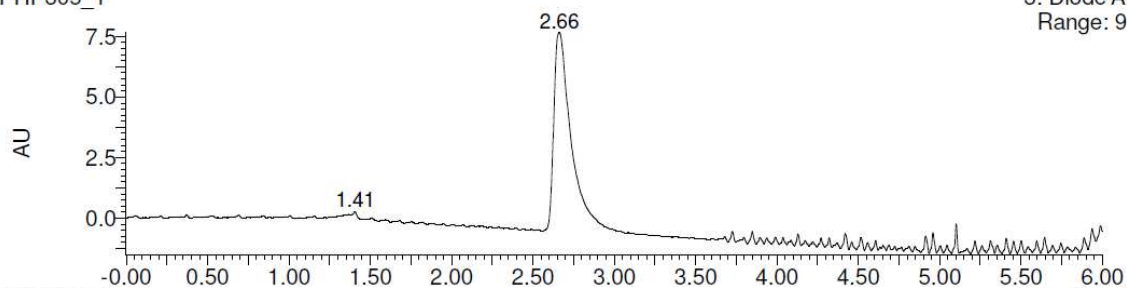

PHP305\_1

1: Scan ES+  
419.5  
7.12e6

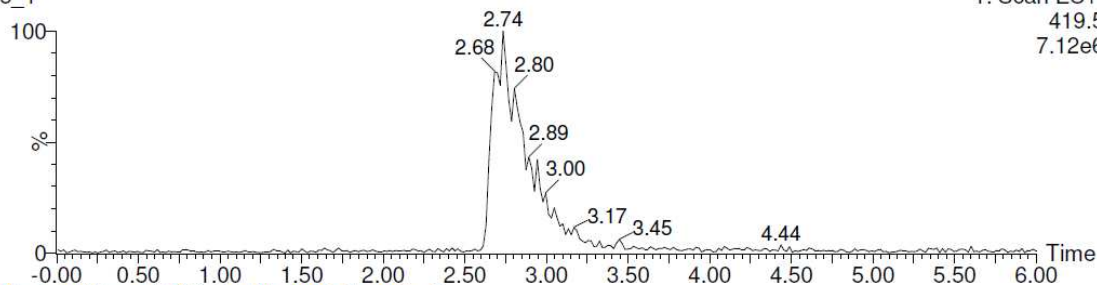

PHP305\_1\_Silica\_4.6X250\_MeOH\_5-30%\_6

PHP305\_1 154 (2.666)

1: Scan ES+  
1.70e7

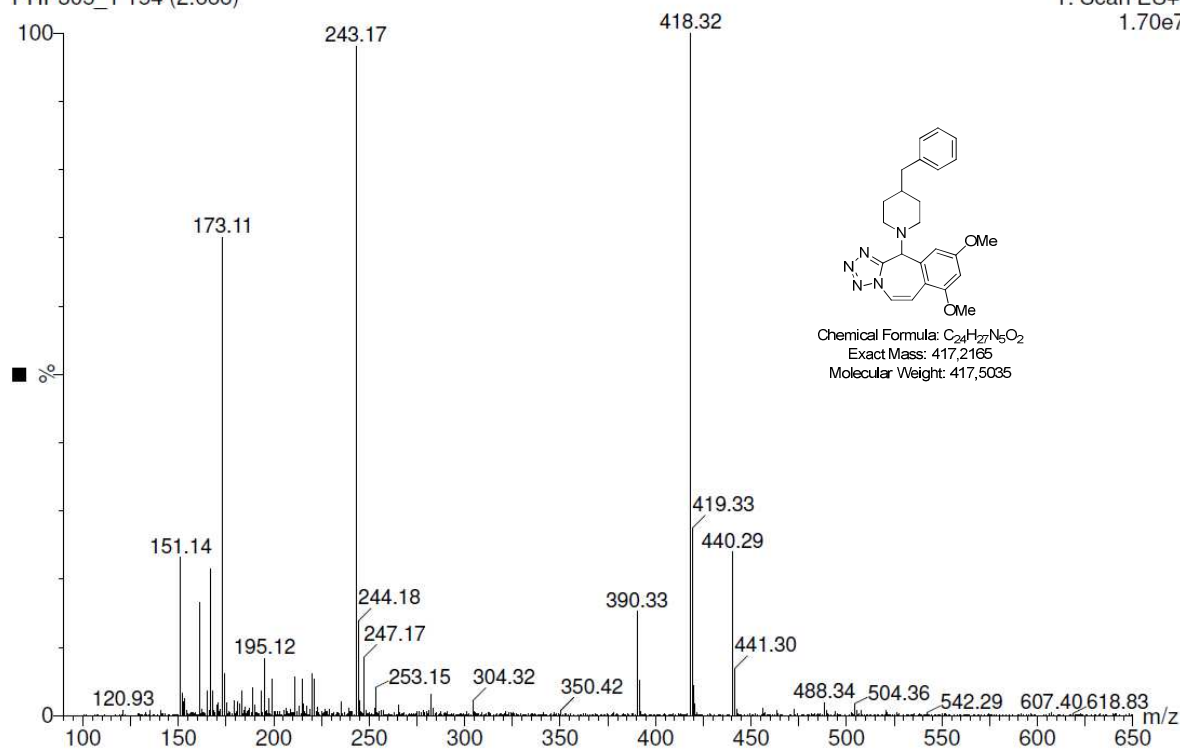



**11h: N-((1-(2,2-dimethoxyethyl)-1H-tetrazol-5-yl)(3,5-dimethoxyphenyl)methyl)aniline.**

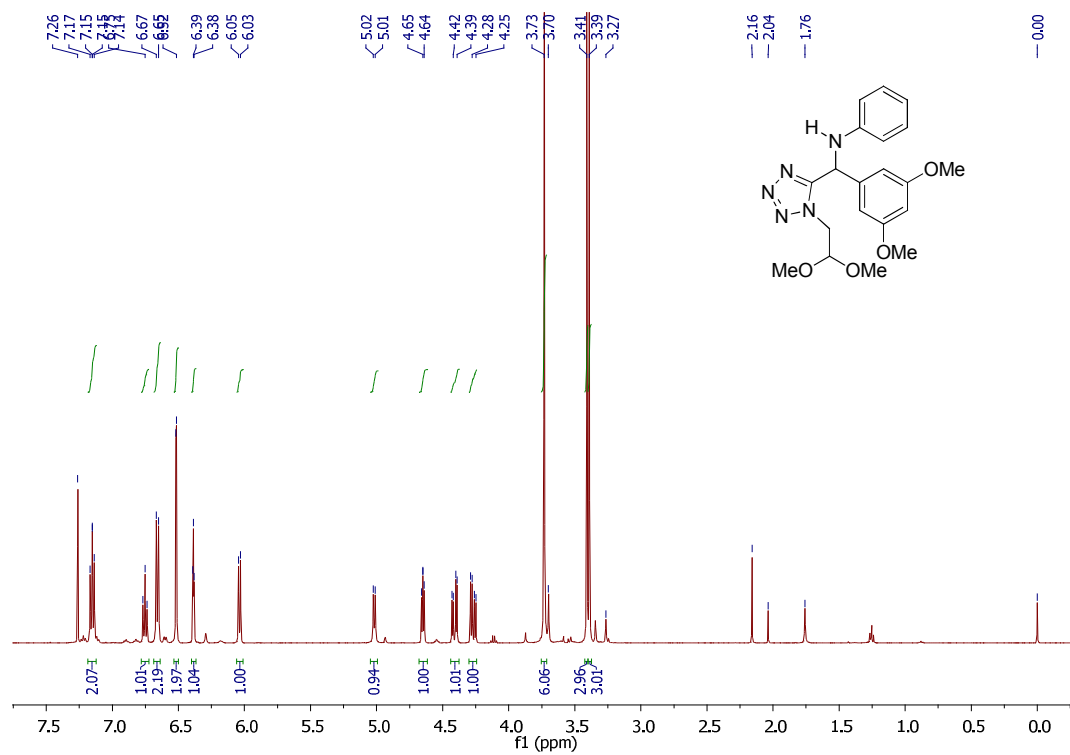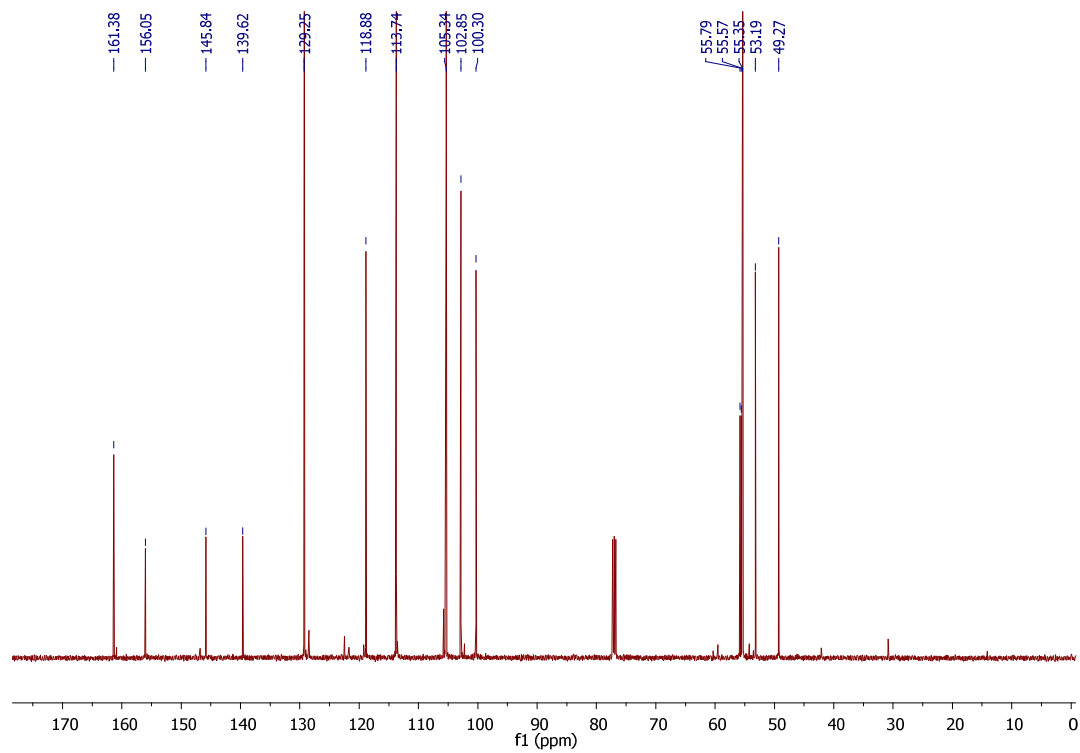

PHP300\_1\_Silica\_4.6X250\_MeOH\_5-30%\_6  
PHP300\_1

3: Diode Array  
Range: 2.085e+1

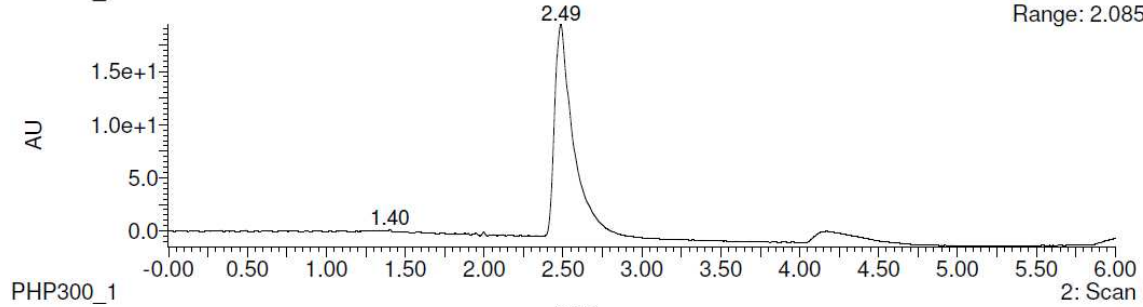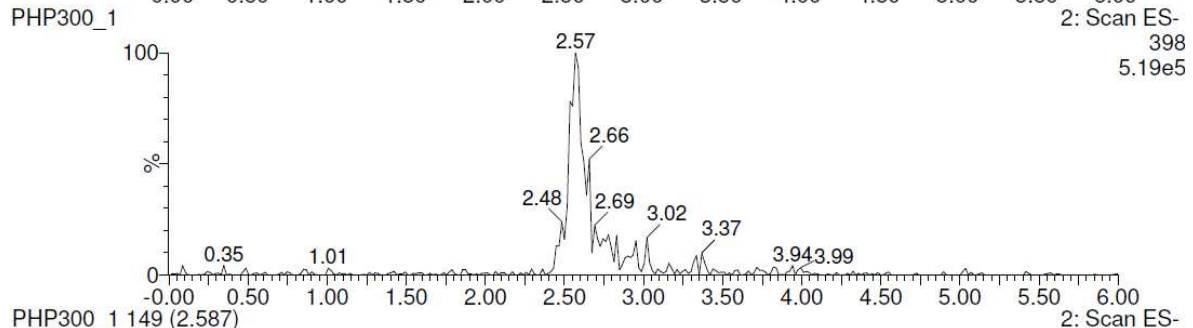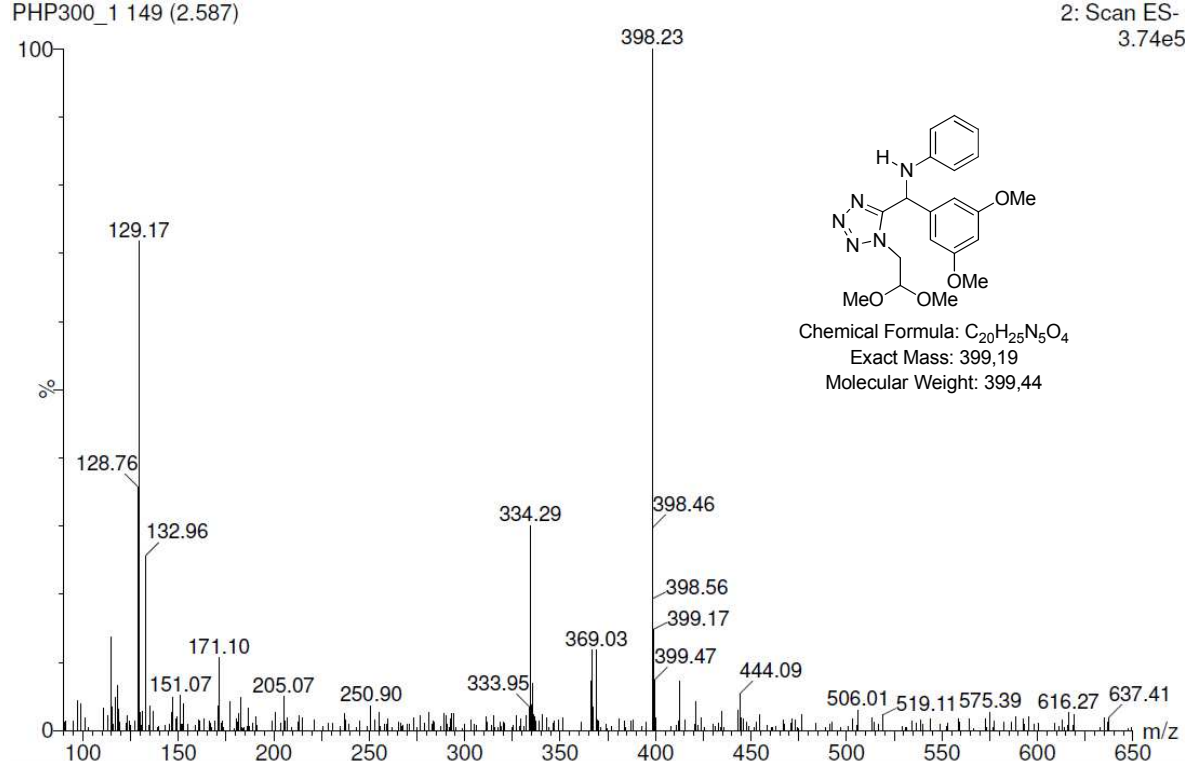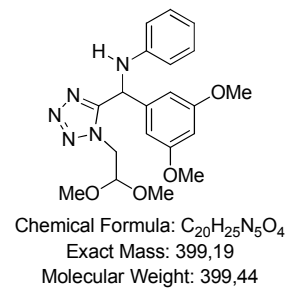

**3h: 7,9-dimethoxy-N-phenyl-11H-benzo[d]tetrazolo[1,5-a]azepin-11-amine.**

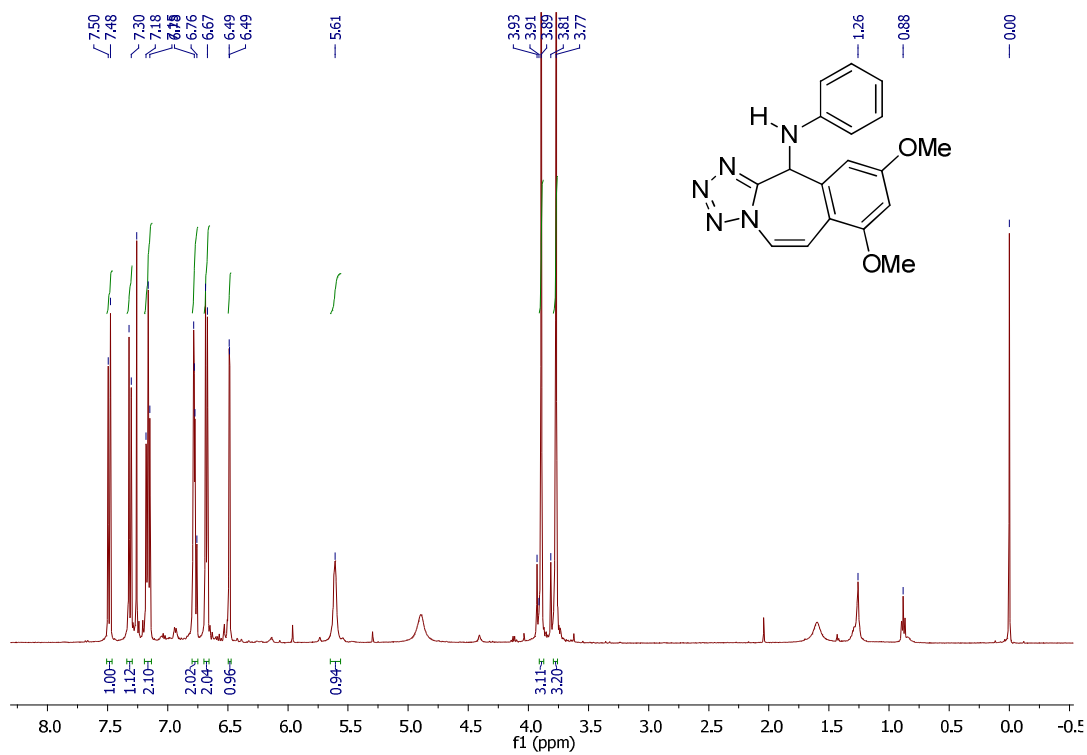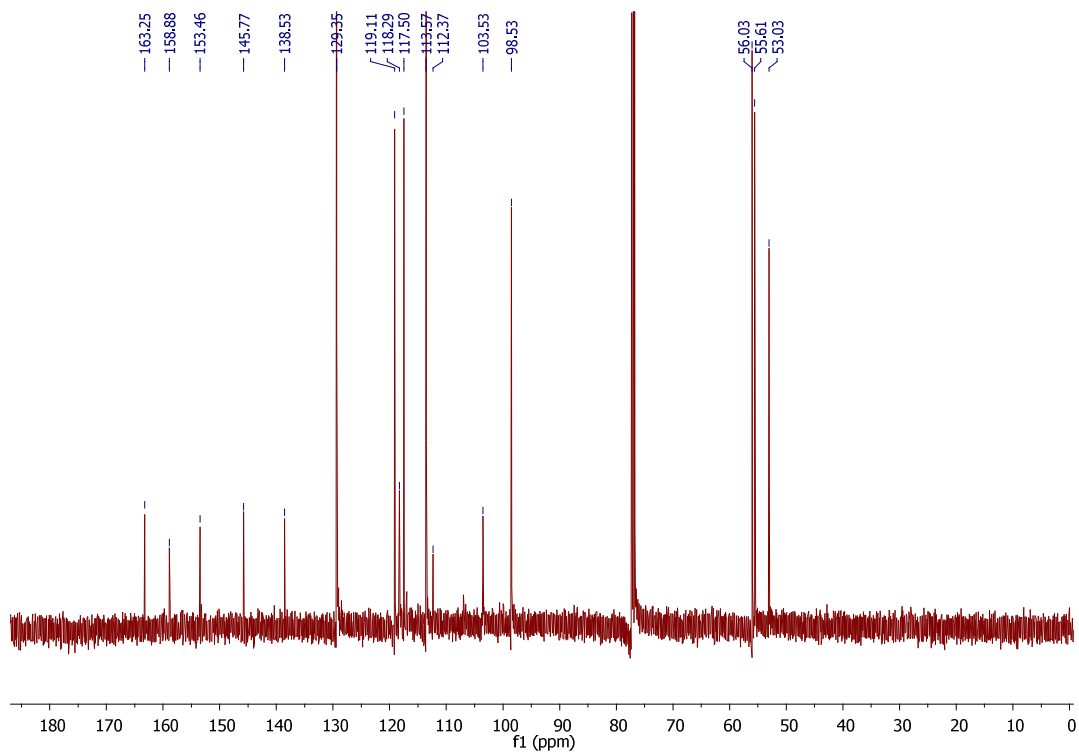

PHP308\_1\_Silica\_4.6X250\_MeOH\_5-30%\_6

PHP308\_1

3: Diode Array  
Range: 8.077

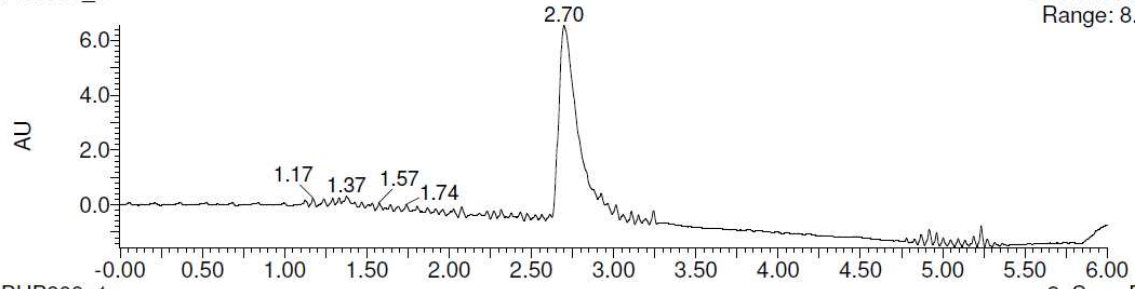

PHP308\_1

2: Scan ES-  
334  
7.62e5

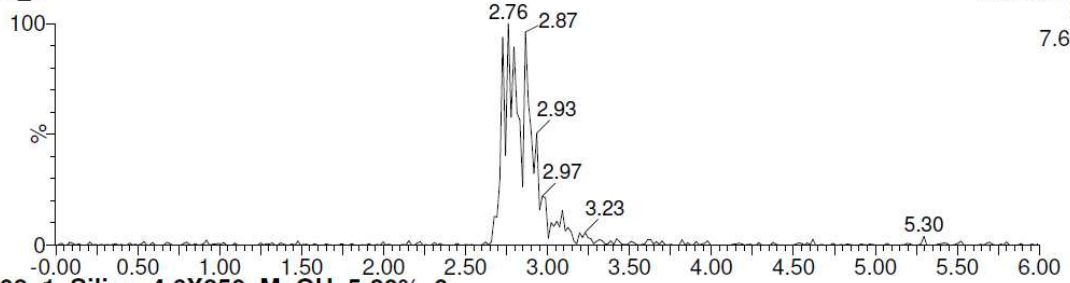

PHP308\_1\_Silica\_4.6X250\_MeOH\_5-30%\_6

PHP308\_1 160 (2.778)

2: Scan ES-  
3.58e5

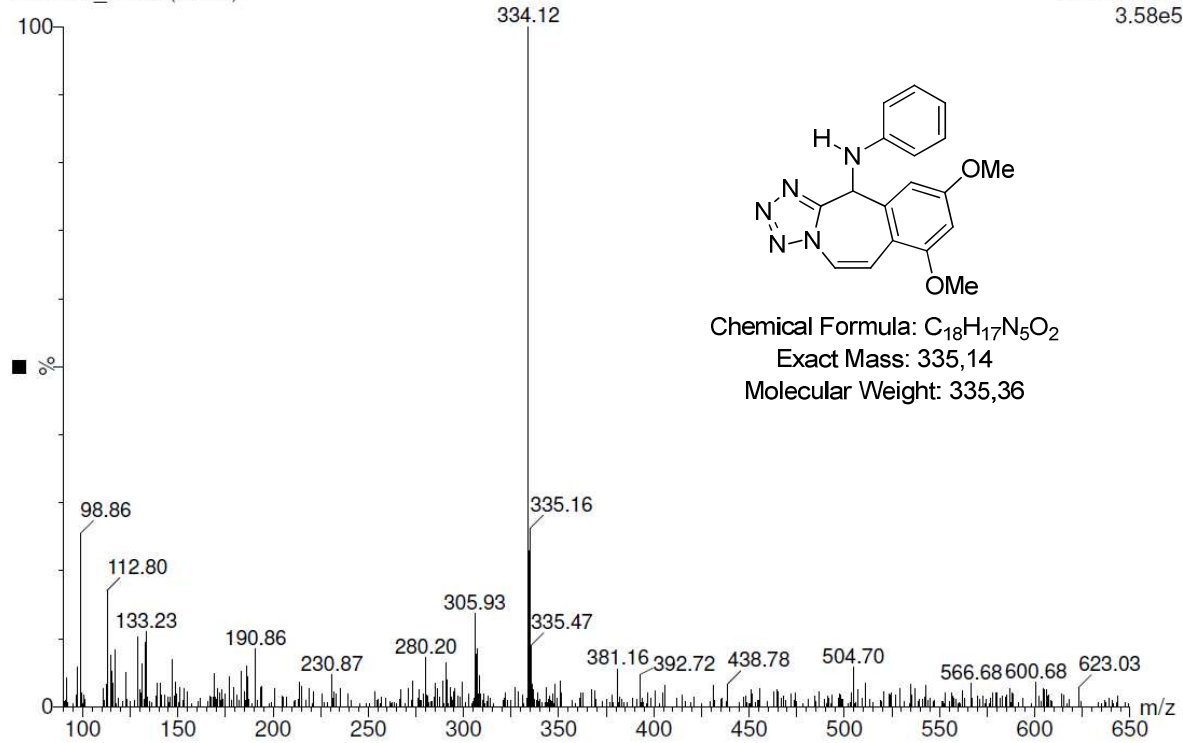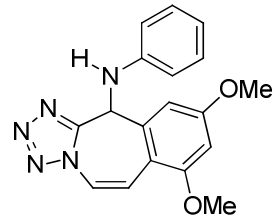

Chemical Formula: C<sub>18</sub>H<sub>17</sub>N<sub>5</sub>O<sub>2</sub>  
Exact Mass: 335,14  
Molecular Weight: 335,36

**11i: 2-(3-chlorophenyl)-N-((1-(2,2-dimethoxyethyl)-1H-tetrazol-5-yl)(3,4-dimethoxyphenyl)methyl)ethanamine.**

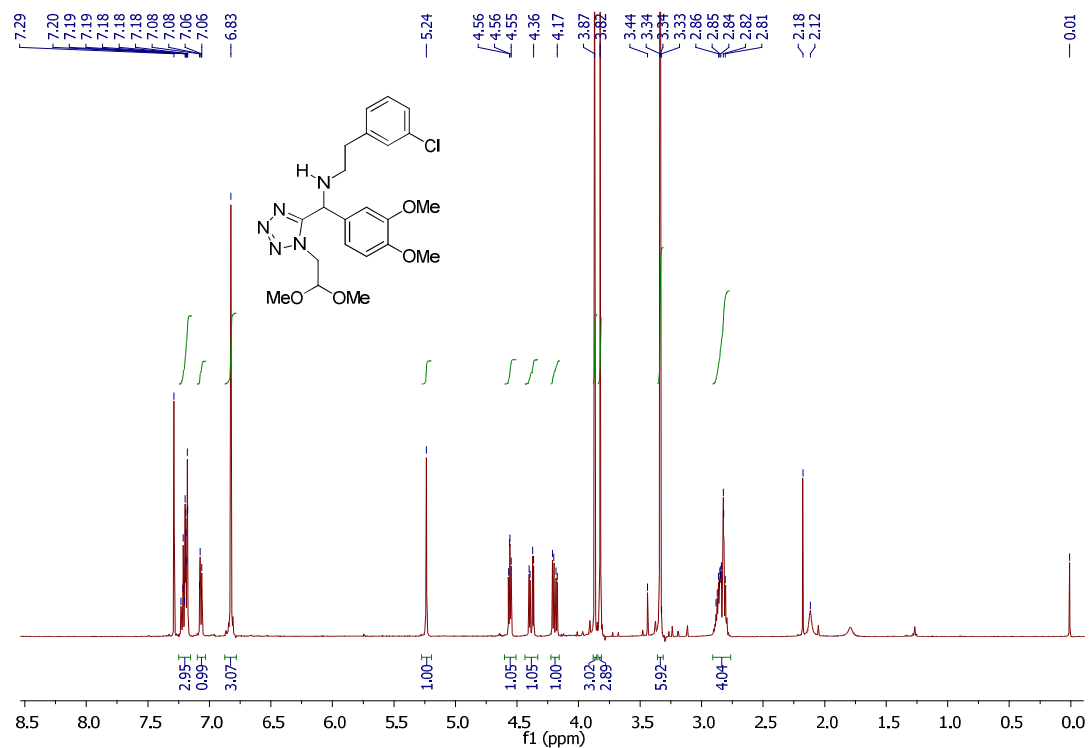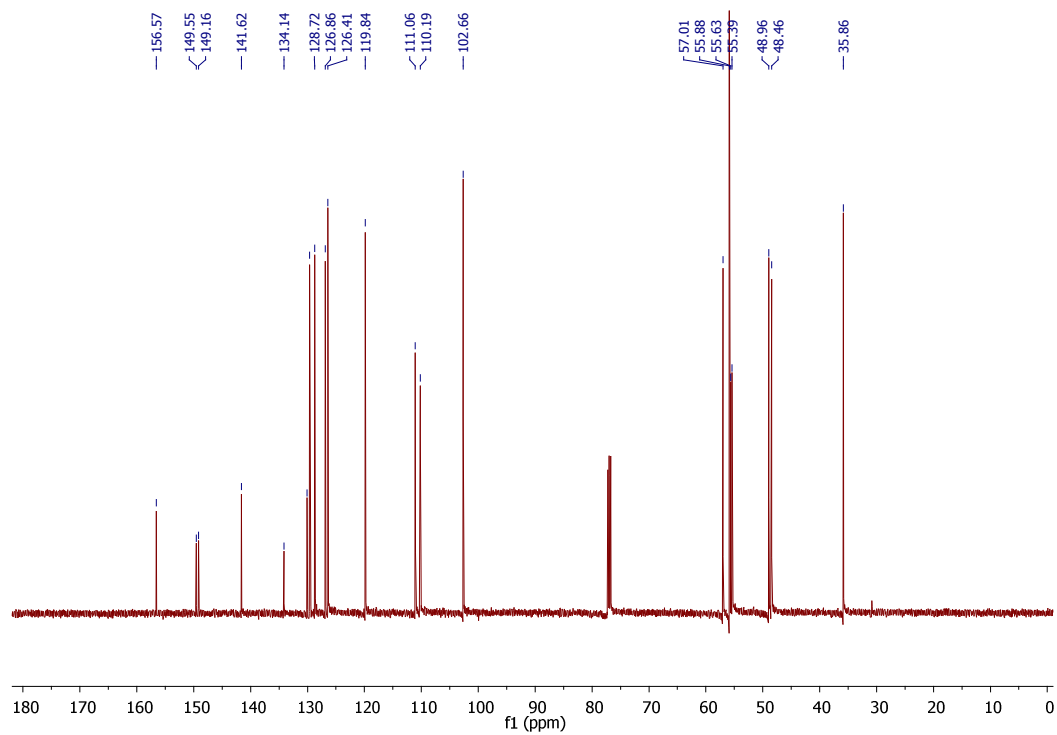

PHP295\_1\_Silica\_4.6X250\_MeOH\_5-30%\_6

PHP295\_1

3: Diode Array  
Range: 2.567e+1

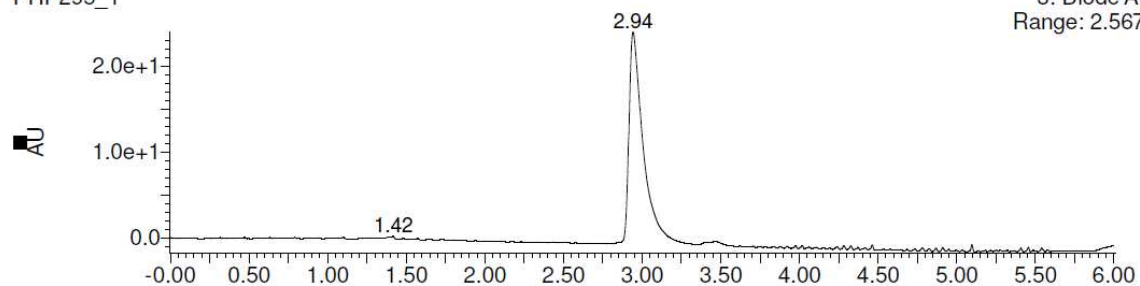

PHP295\_1

2: Scan ES-  
460  
2.61e5

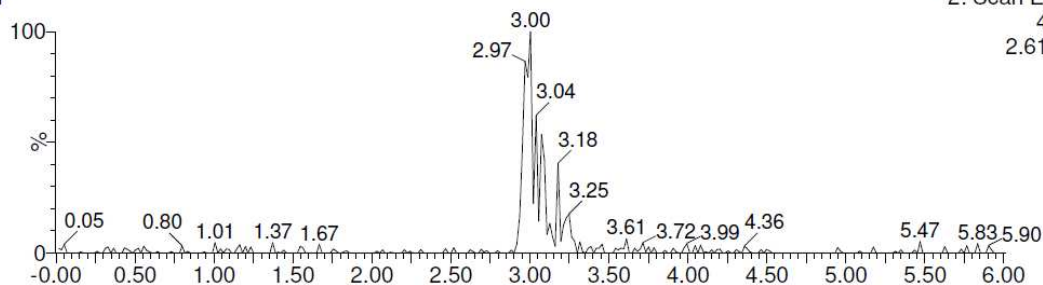

PHP295\_1\_Silica\_4.6X250\_MeOH\_5-30%\_6

PHP295\_1 171 (2.969)

2: Scan ES-  
1.49e5

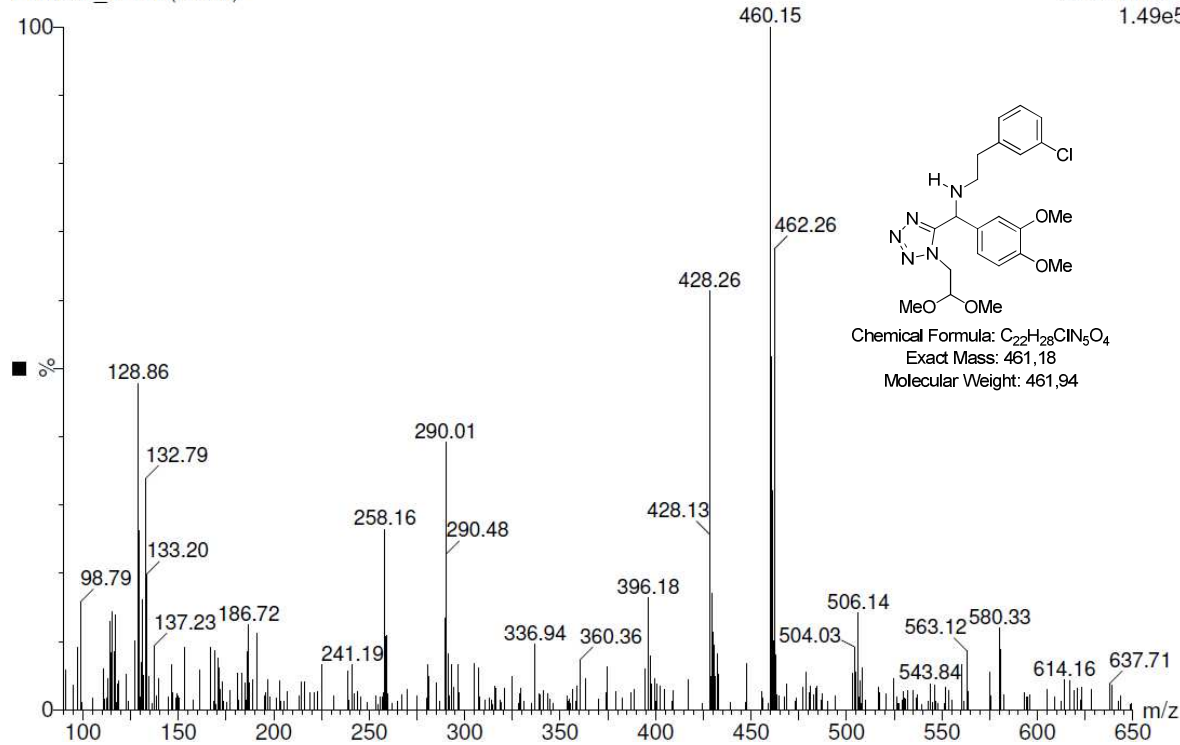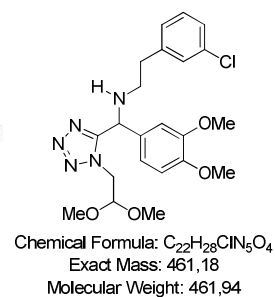

**3i: N-(3-chlorophenethyl)-8,9-dimethoxy-11H-benzo[d]tetrazolo[1,5-a]azepin-11-amine.**

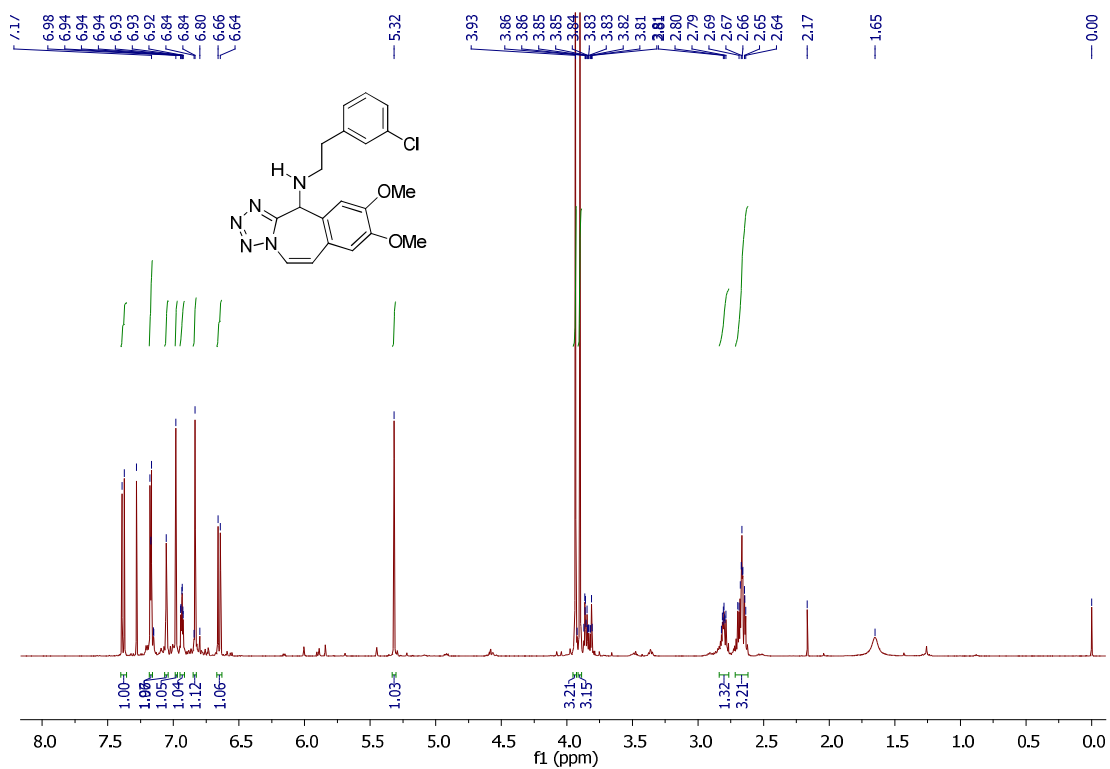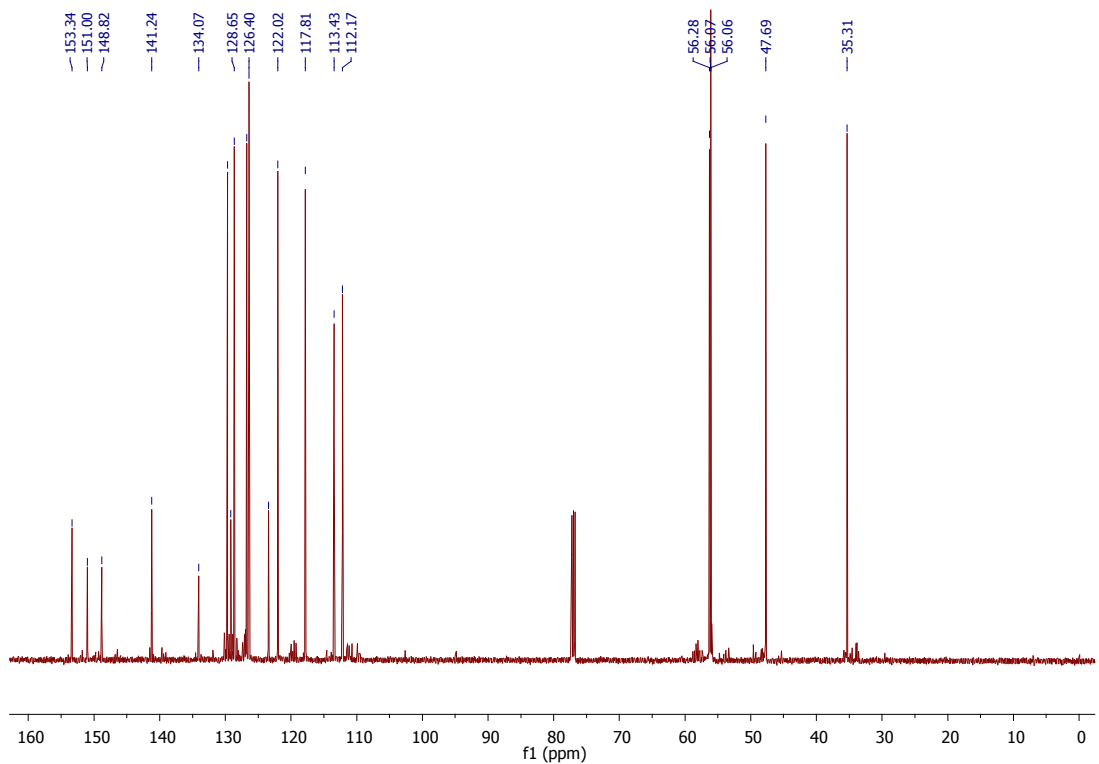

PHP303\_1\_Silica\_4.6X250\_MeOH\_5-30%\_6

PHP303\_1

3: Diode Array  
Range: 4.009e+1

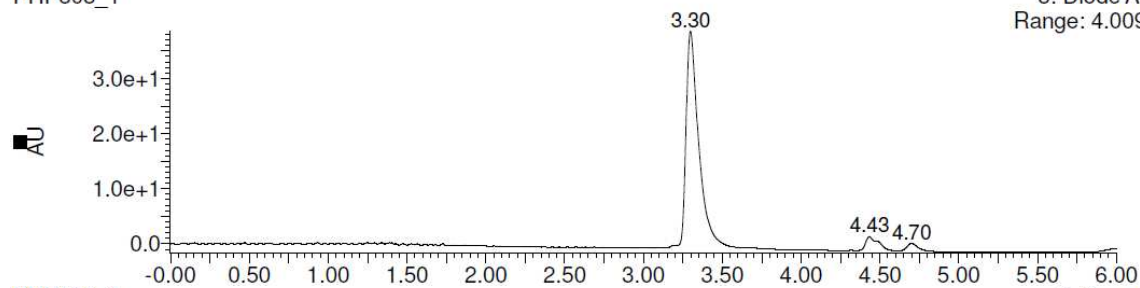

PHP303\_1

2: Scan ES-  
396  
1.72e5

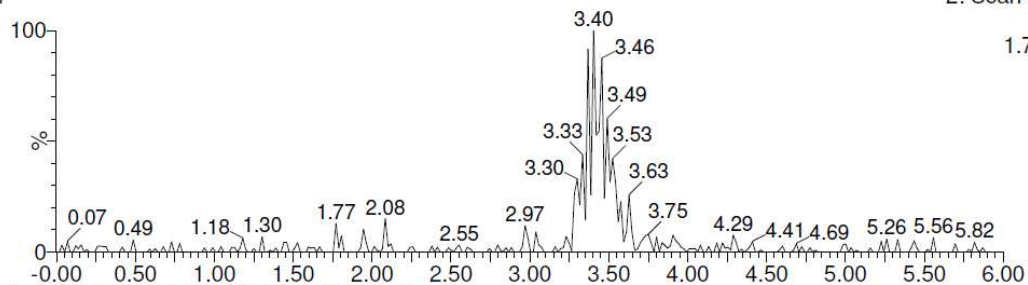

PHP303\_1\_Silica\_4.6X250\_MeOH\_5-30%\_6

PHP303\_1 194 (3.369)

2: Scan ES-  
1.07e5

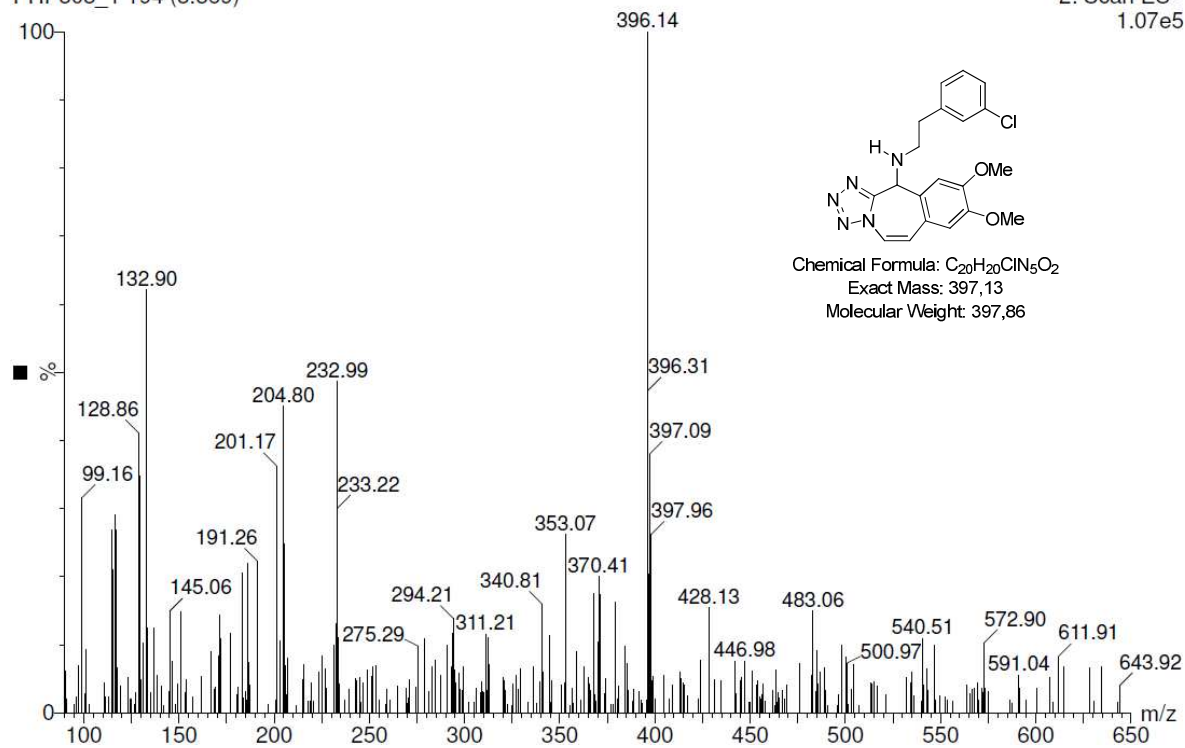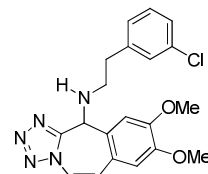

Chemical Formula: C<sub>20</sub>H<sub>20</sub>ClN<sub>5</sub>O<sub>2</sub>  
Exact Mass: 397.13  
Molecular Weight: 397.86



**11j: 4-benzyl-1-((1-(2,2-dimethoxyethyl)-1H-tetrazol-5-yl)(3,4-dimethoxyphenyl)methyl) piperidine.**

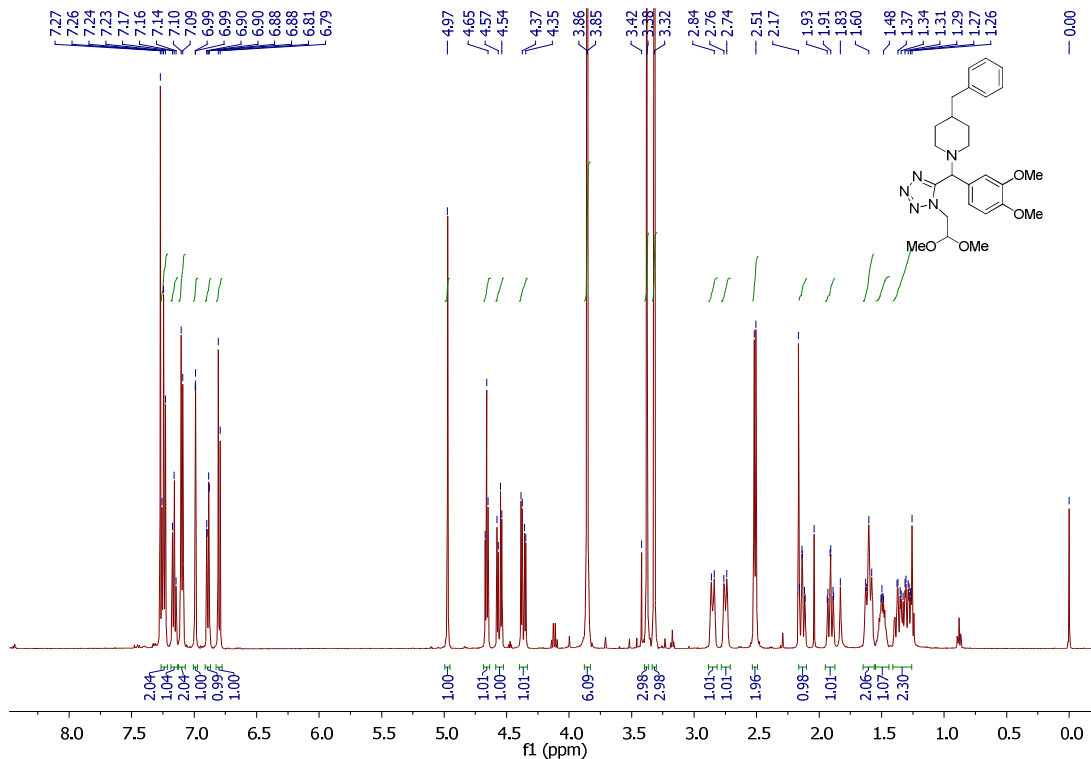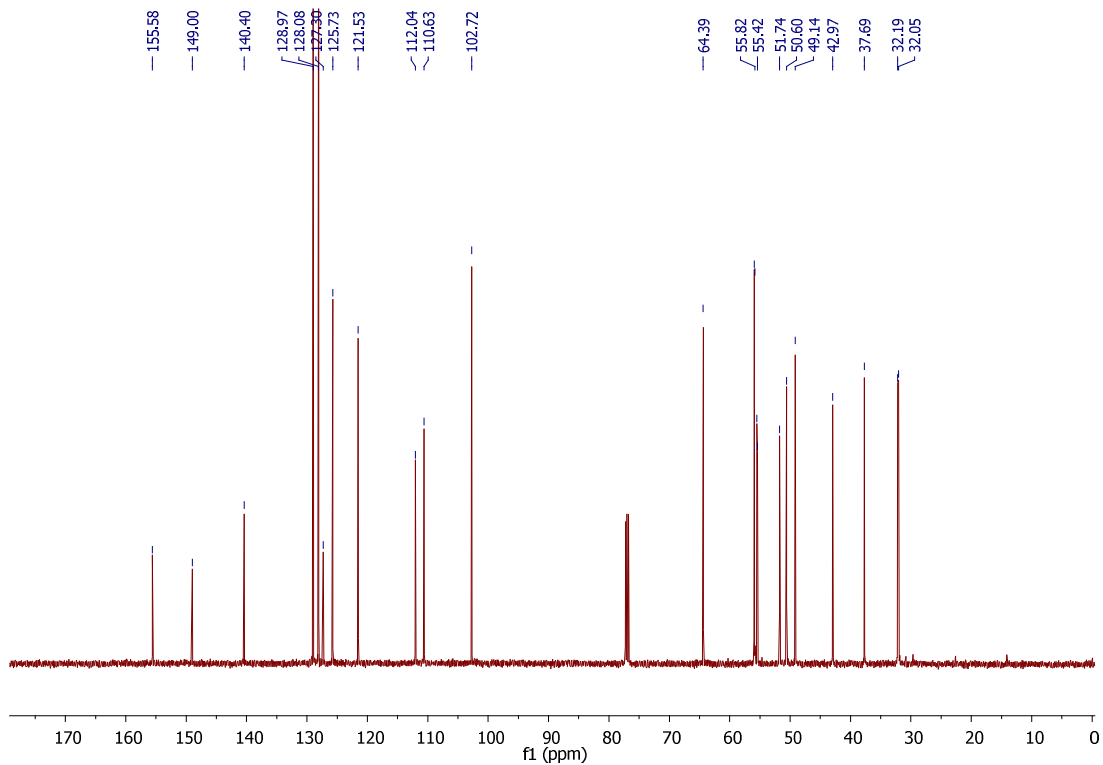

PHP294\_1\_Silica\_4.6X250\_MeOH\_5-30%\_6

PHP294\_1

3: Diode Array  
Range: 2.413e+1

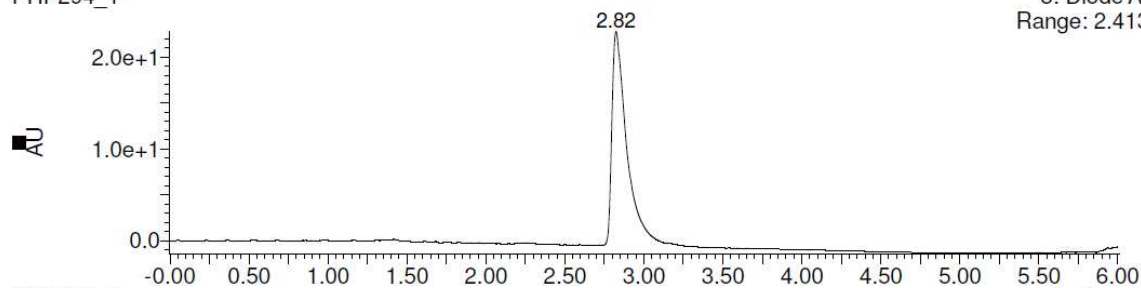

PHP294\_1

1: Scan ES+  
483  
1.26e7

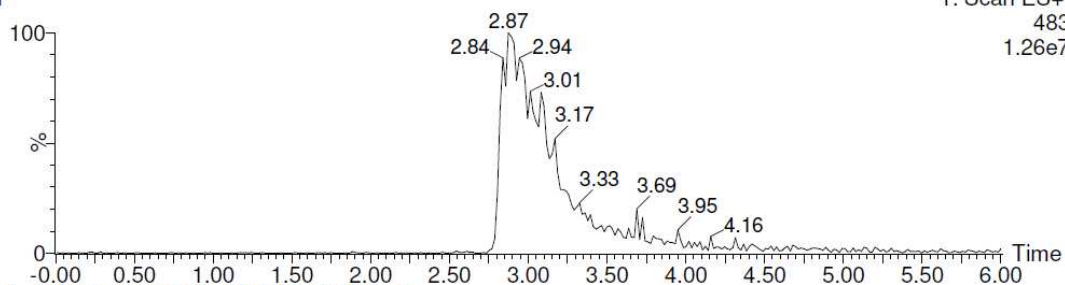

PHP294\_1\_Silica\_4.6X250\_MeOH\_5-30%\_6

PHP294\_1 164 (2.839)

1: Scan ES+  
3.88e7

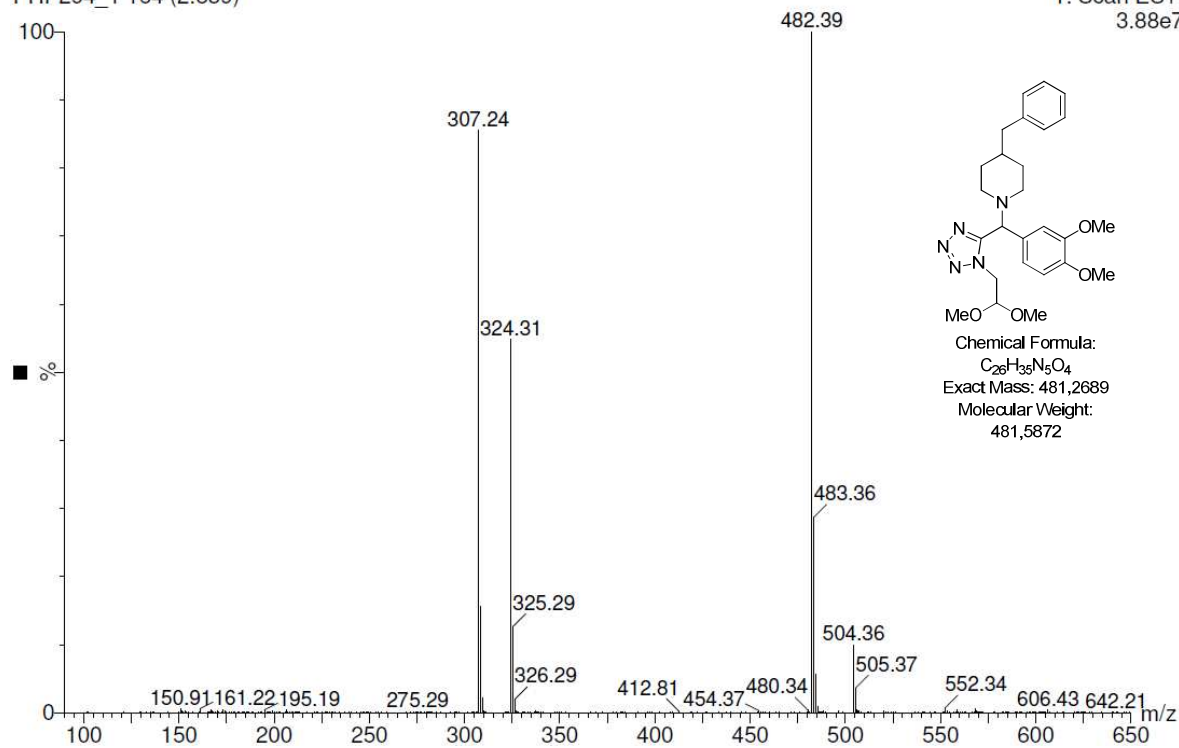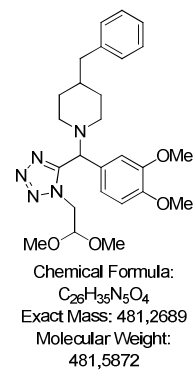

**3j: 11-(4-benzylpiperidin-1-yl)-8,9-dimethoxy-11H-benzo[d]tetrazolo[1,5-a]zepine.**

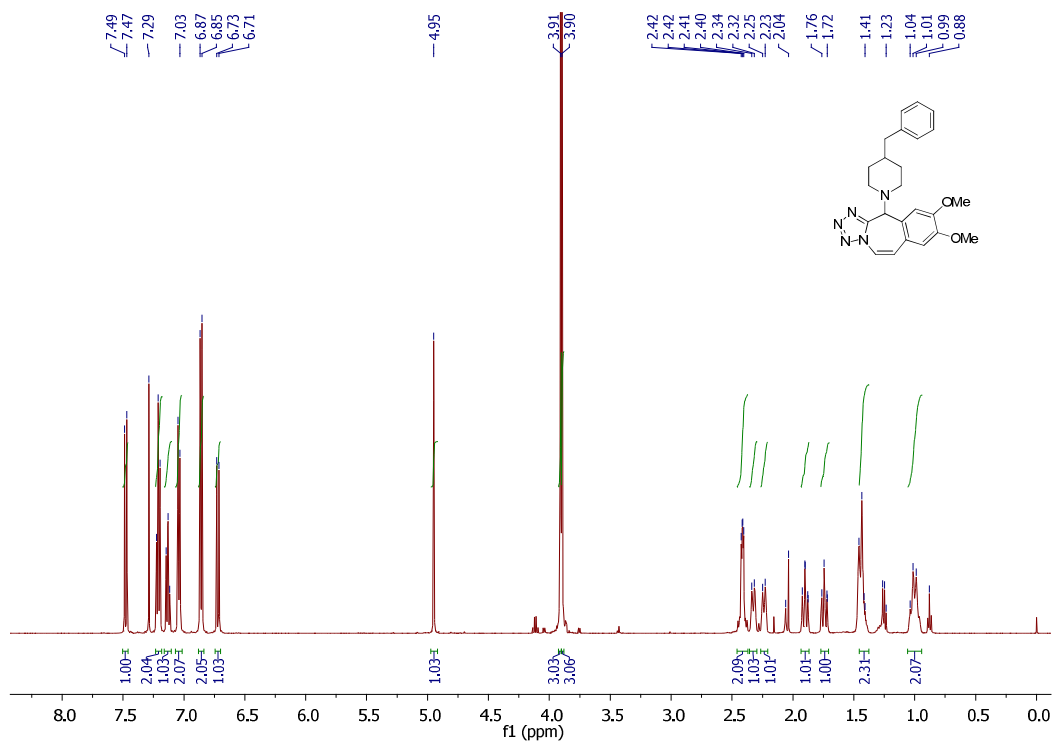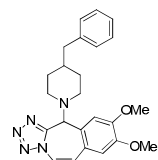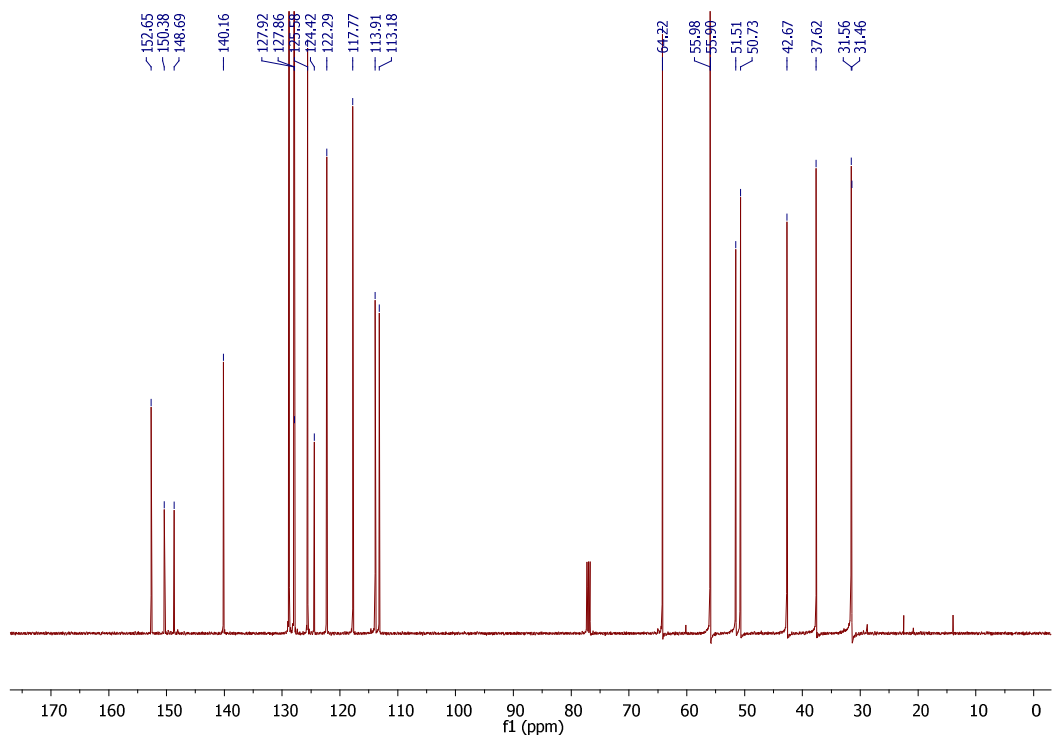

PHP302\_A\_1\_Silica\_4.6X250\_MeOH\_5-30%\_6

PHP302\_A\_1

3: Diode Array  
Range: 3.952e+1

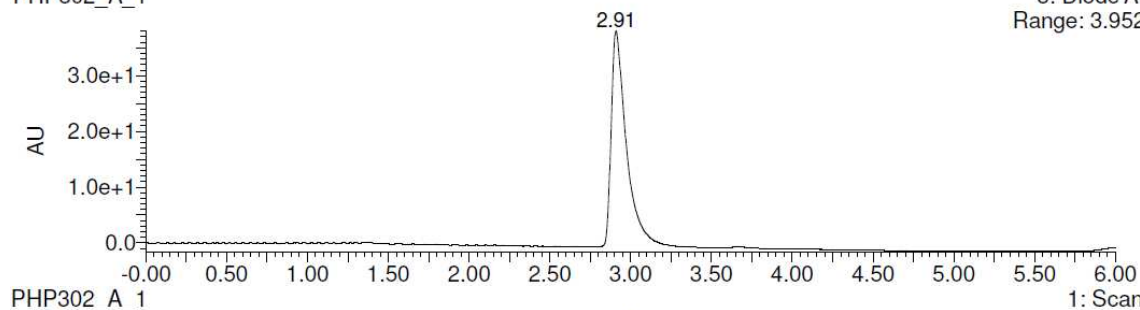

PHP302\_A\_1

1: Scan ES-  
41  
1.15e

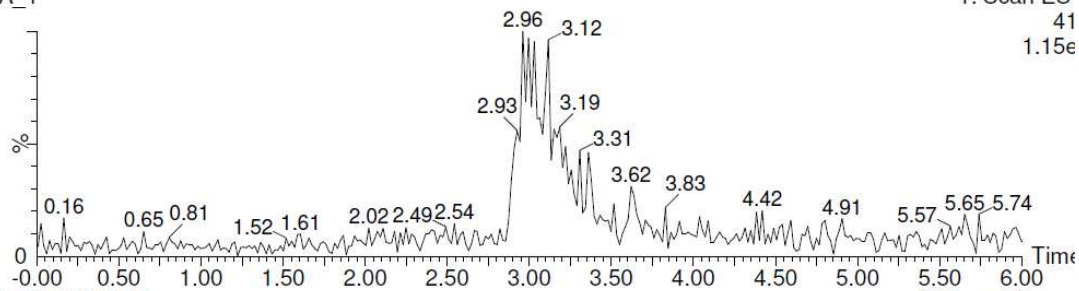

PHP302\_A\_1 165 (2.865)

2: Scan ES-  
4.52e4

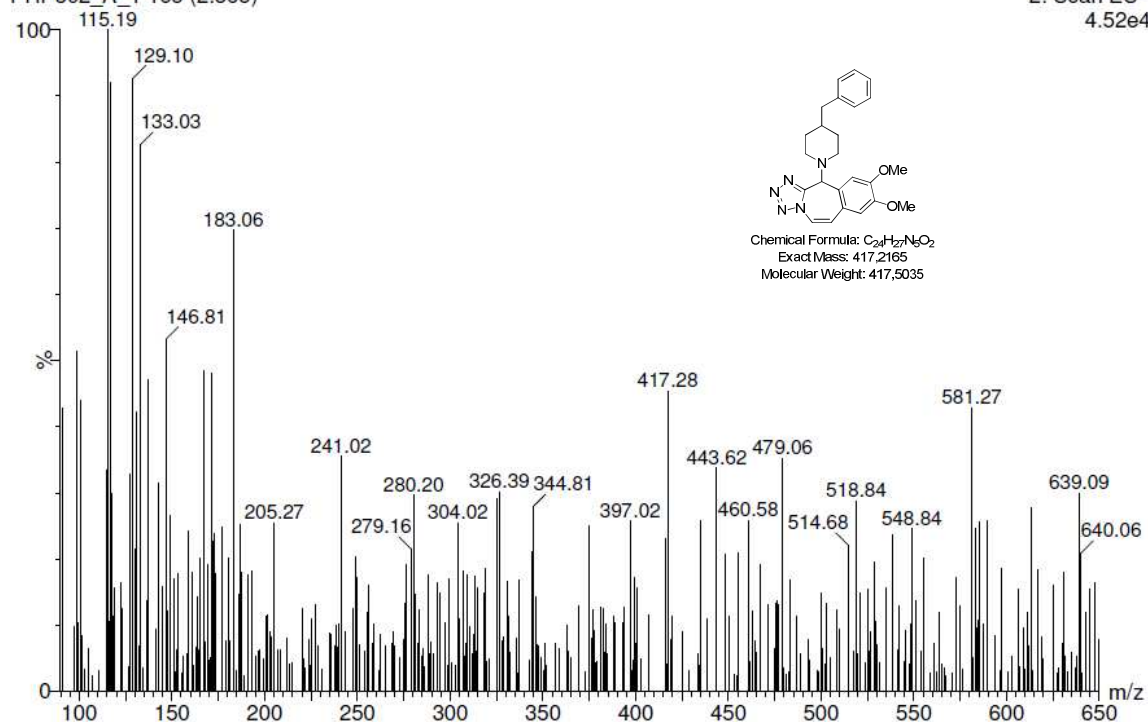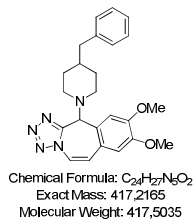

**14a: 1-(1-(2,2-dimethoxyethyl)-1H-tetrazol-5-yl)-N-(3,4-dimethoxyphenethyl)-2-methylpropan-1-amine**

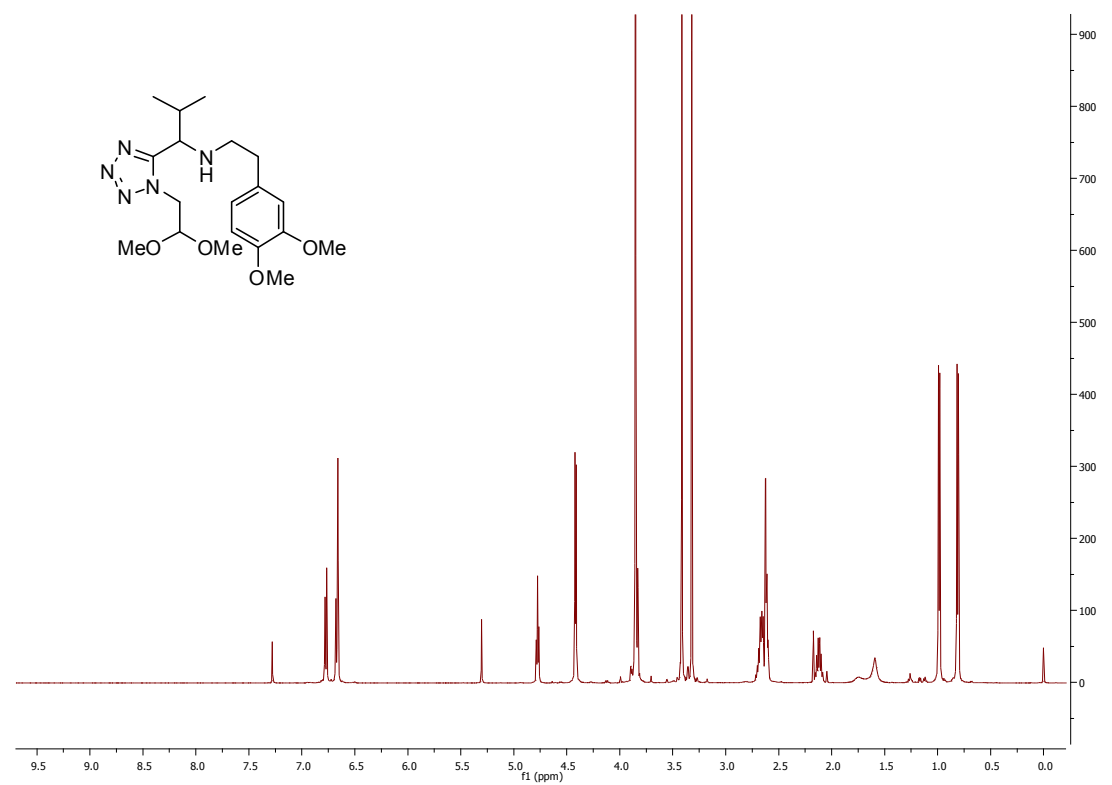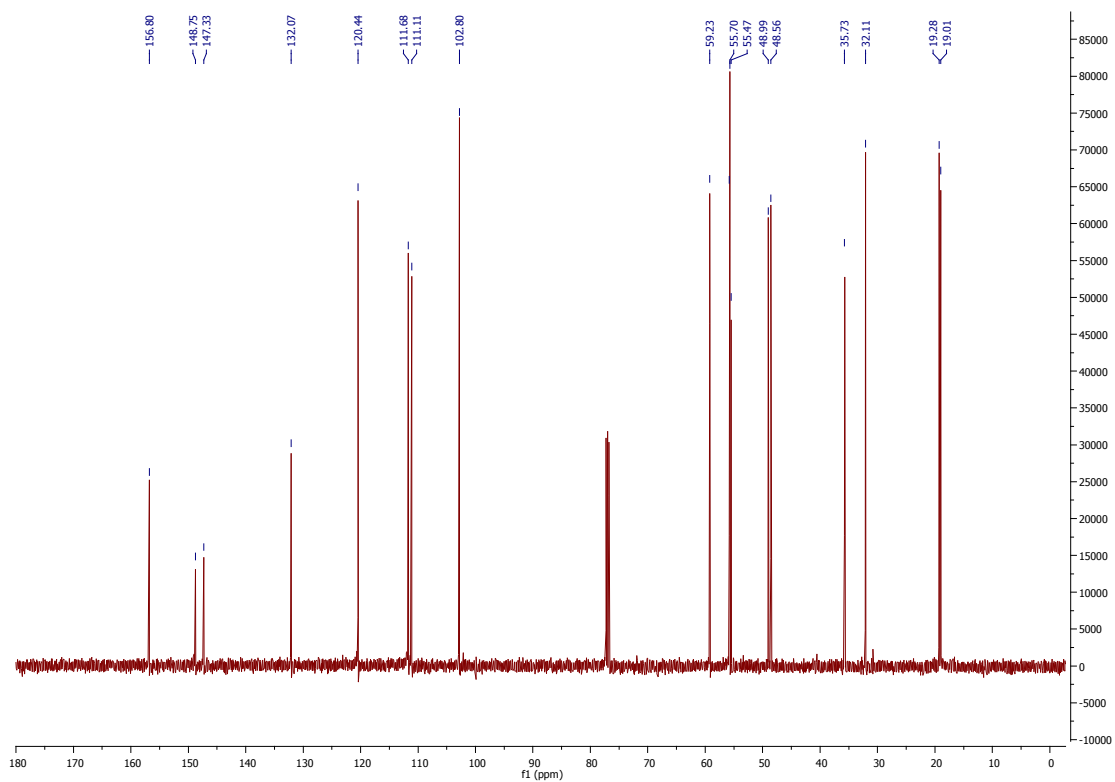

PHP091\_1\_Silica\_4.6X250\_MeOH\_5-30%\_6min

PHP091\_1

3: Diode Array  
Range: 2.323e+1

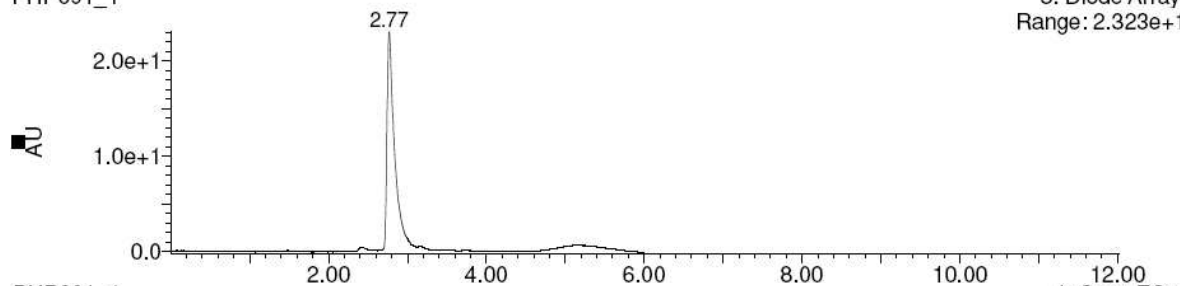

PHP091\_1

1: Scan ES+  
394.24  
1.37e7

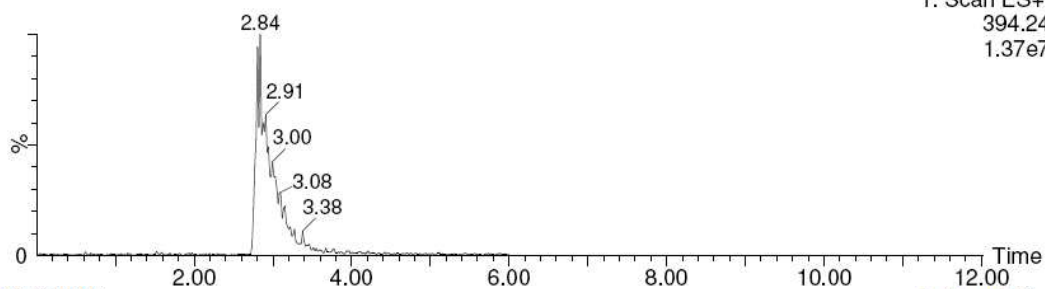

PHP091\_1 162 (2.804)

1: Scan ES+  
8.89e7

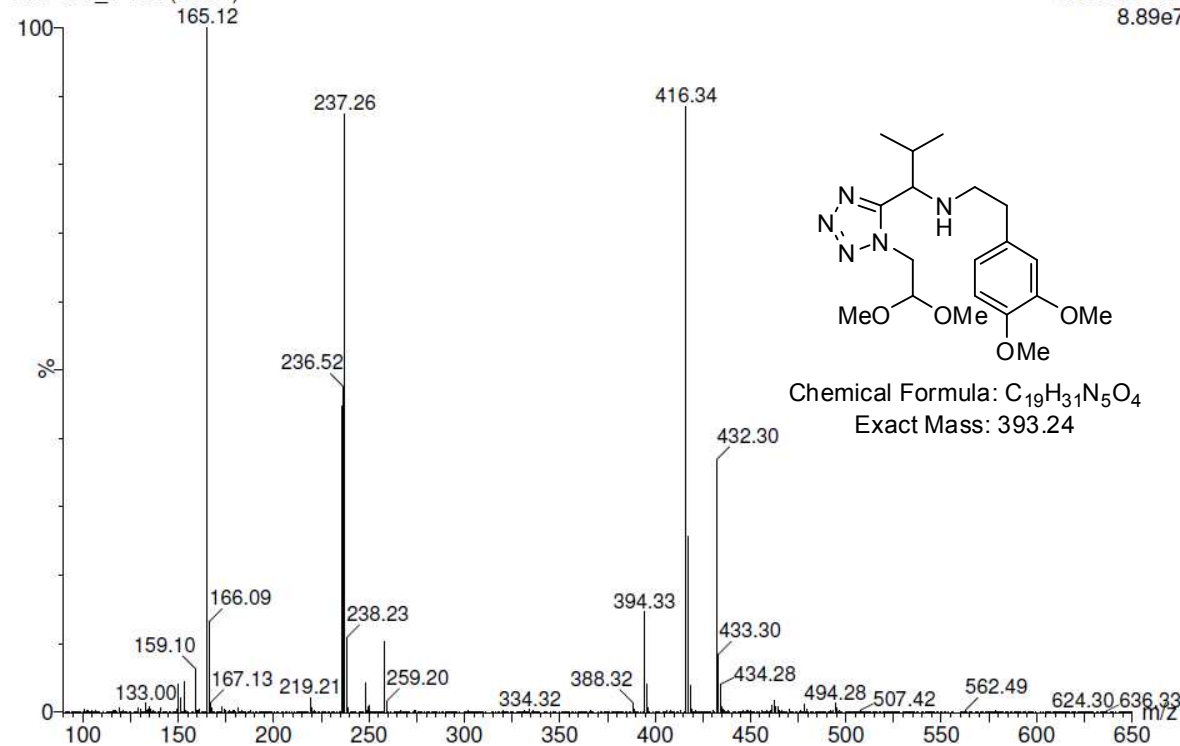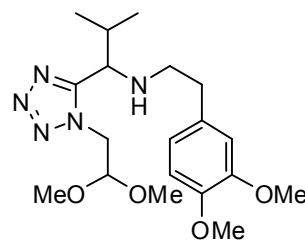

Chemical Formula: C<sub>19</sub>H<sub>31</sub>N<sub>5</sub>O<sub>4</sub>  
Exact Mass: 393.24

**4a: 8-isopropyl-2,3-dimethoxy-6,8,13,13a-tetrahydro-5H-tetrazolo[1',5':4,5]pyrazino[2,1-a]isoquinoline**

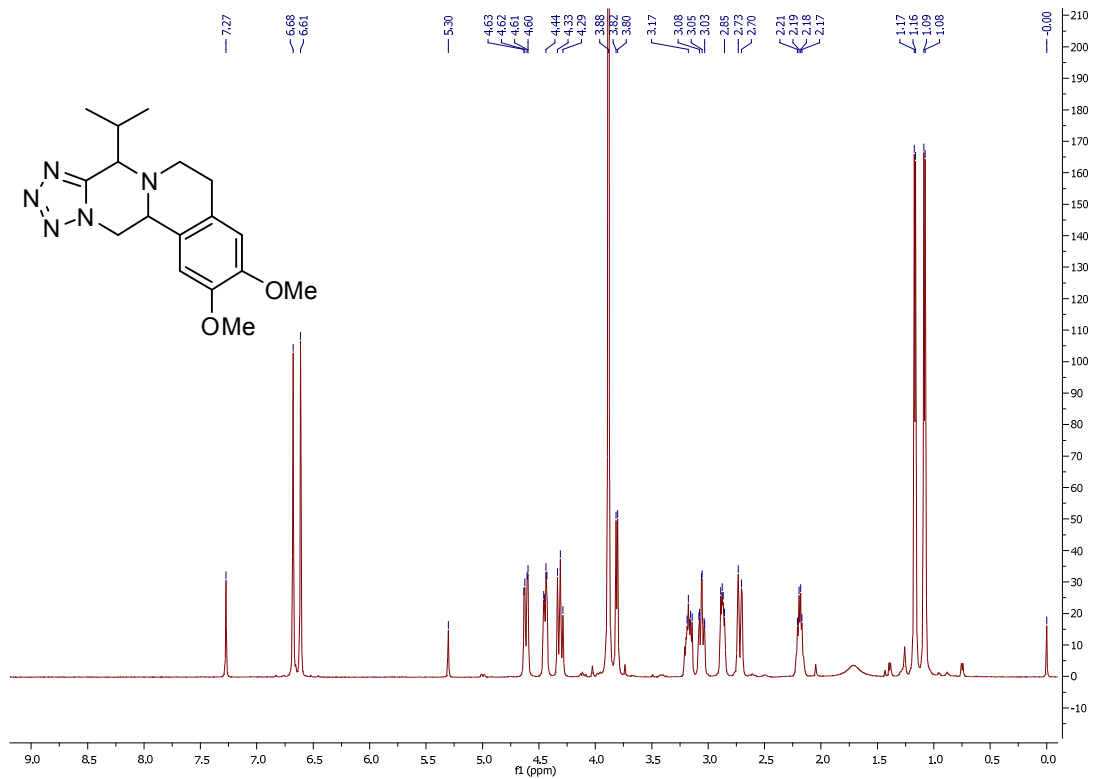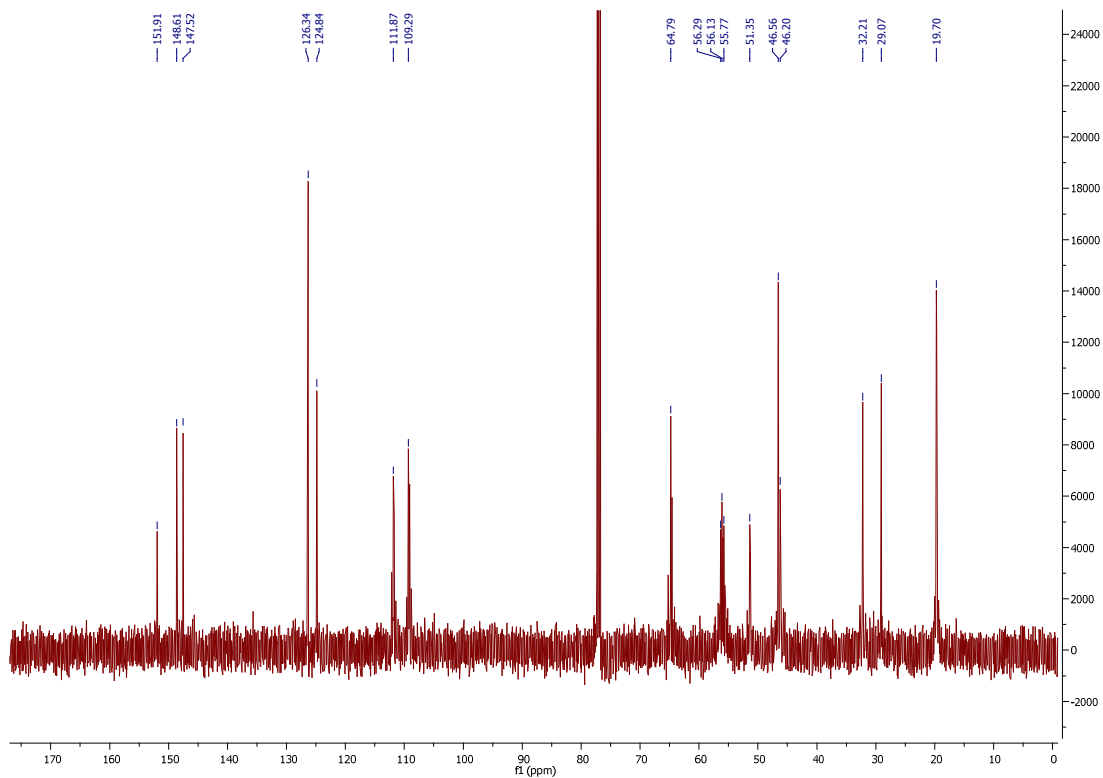

PHP112\_1\_Silica\_4.6X250\_MeOH\_5-30%\_6min

PHP112\_1

3: Diode Array  
Range: 4.835

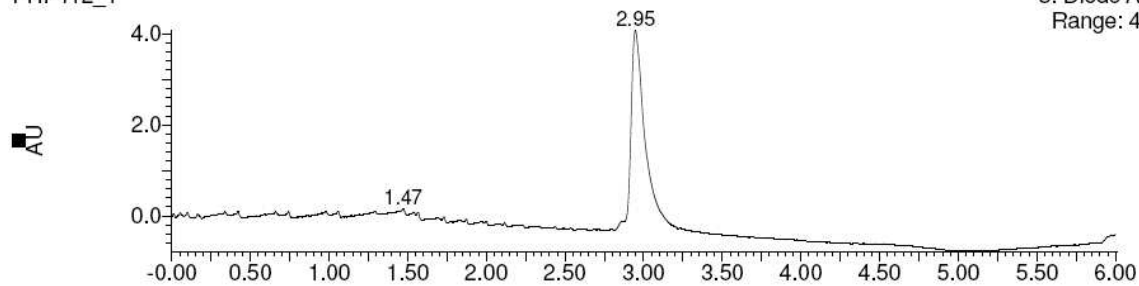

PHP112\_1

1: Scan ES+  
330.19  
1.11e7

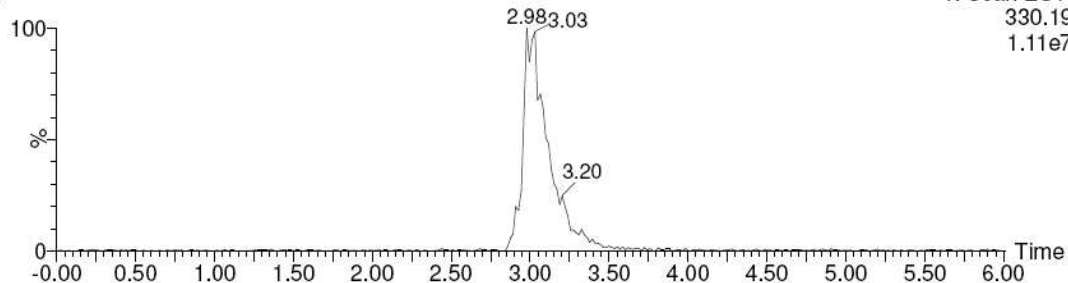

PHP112\_1 176 (3.048)

1: Scan ES+  
7.56e7

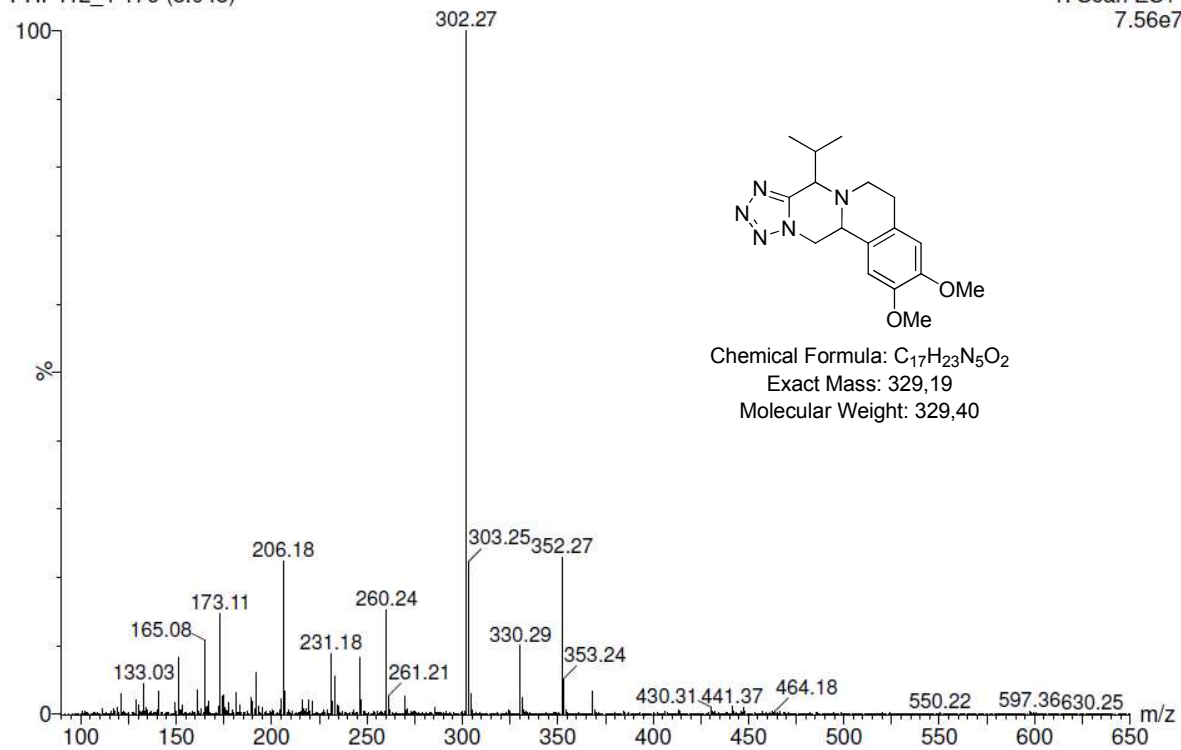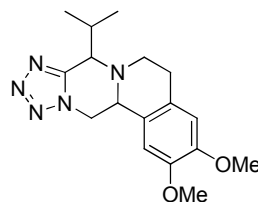

Chemical Formula: C<sub>17</sub>H<sub>23</sub>N<sub>5</sub>O<sub>2</sub>  
Exact Mass: 329,19  
Molecular Weight: 329,40



**14b: N-((4-chlorophenyl)(1-(2,2-dimethoxyethyl)-1H-tetrazol-5-yl)methyl)-2-(3,4-dimethoxyphenyl)ethanamine**

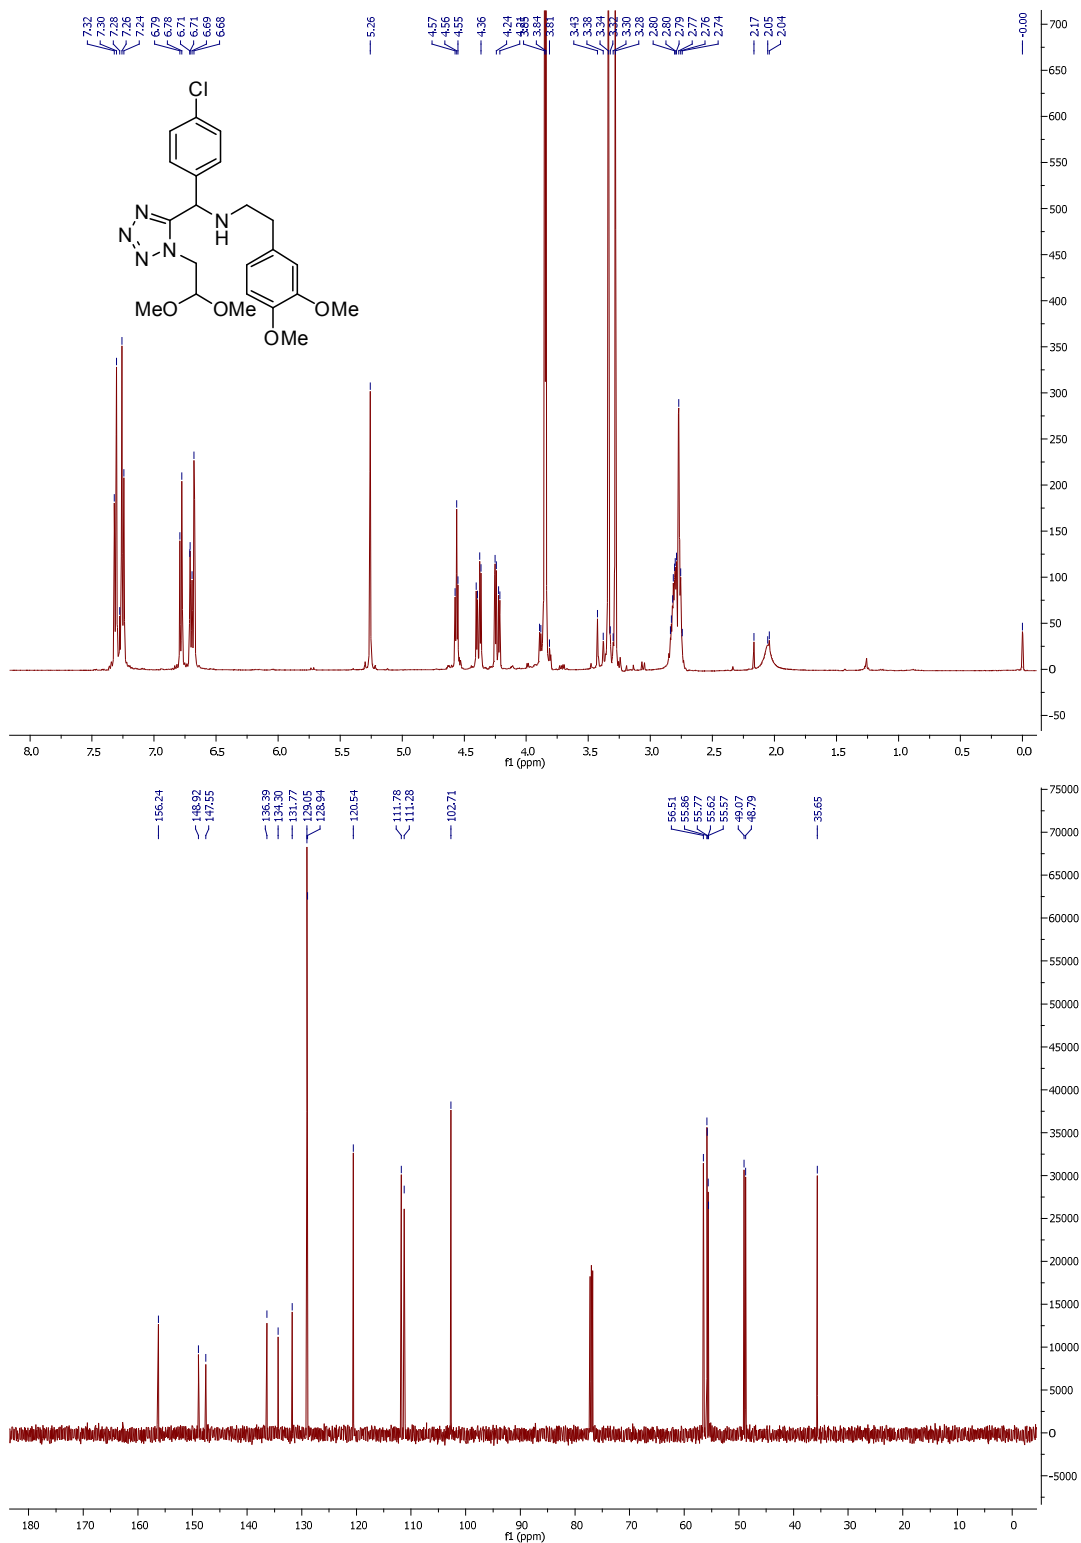

PHP027\_1\_Silica\_4.6X250\_MeOH\_5-30%\_6min

PHP027\_1 Sm (Mn, 2x3)

1: Scan ES+  
462.18  
5.41e7  
Area

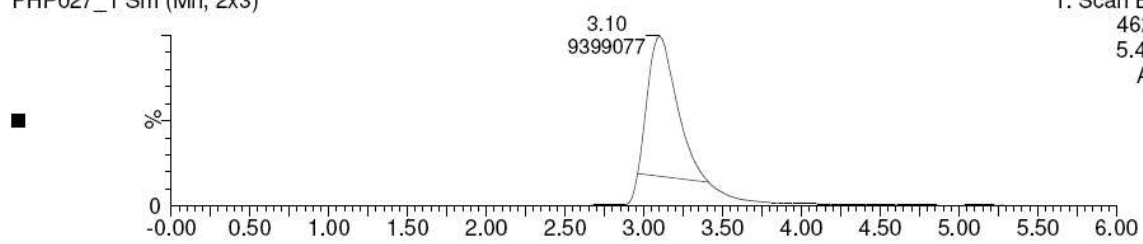

PHP027\_1

1: Scan ES+  
462.18  
6.76e7

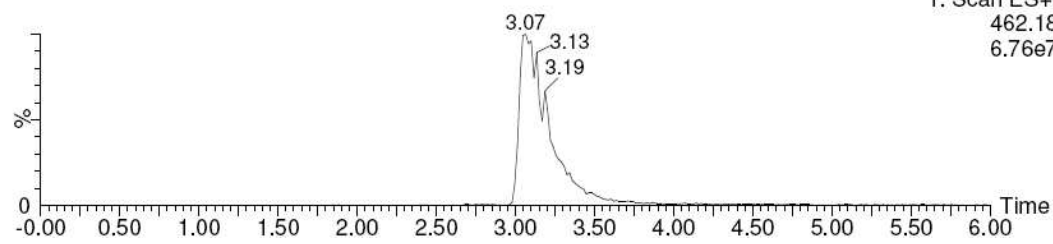

PHP027\_1 179 (3.100)

1: Scan ES+  
8.20e7

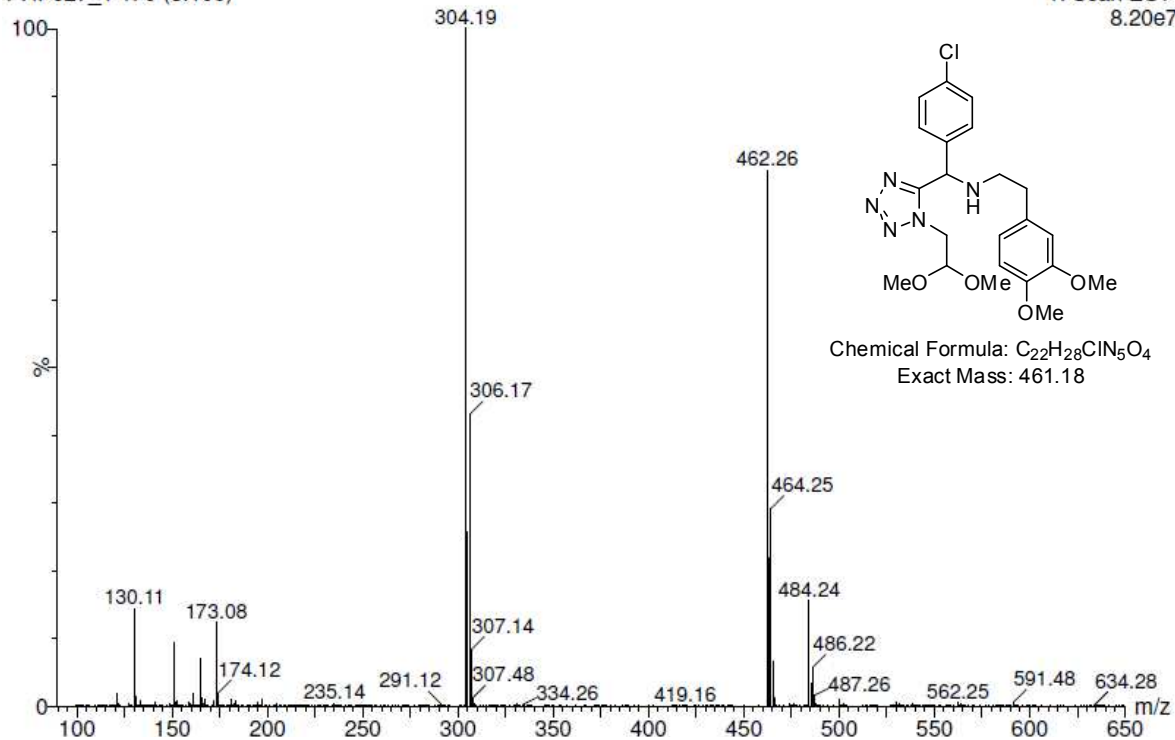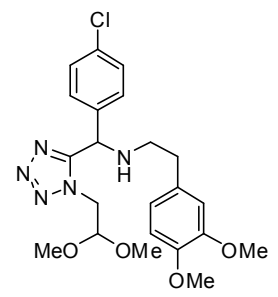

Chemical Formula: C<sub>22</sub>H<sub>28</sub>ClN<sub>5</sub>O<sub>4</sub>  
Exact Mass: 461.18

**4b: 8-(4-chlorophenyl)-2,3-dimethoxy-6,8,13,13a-tetrahydro-5H-tetrazolo[1',5':4,5]pyrazino[2,1-a]isoquinoline**

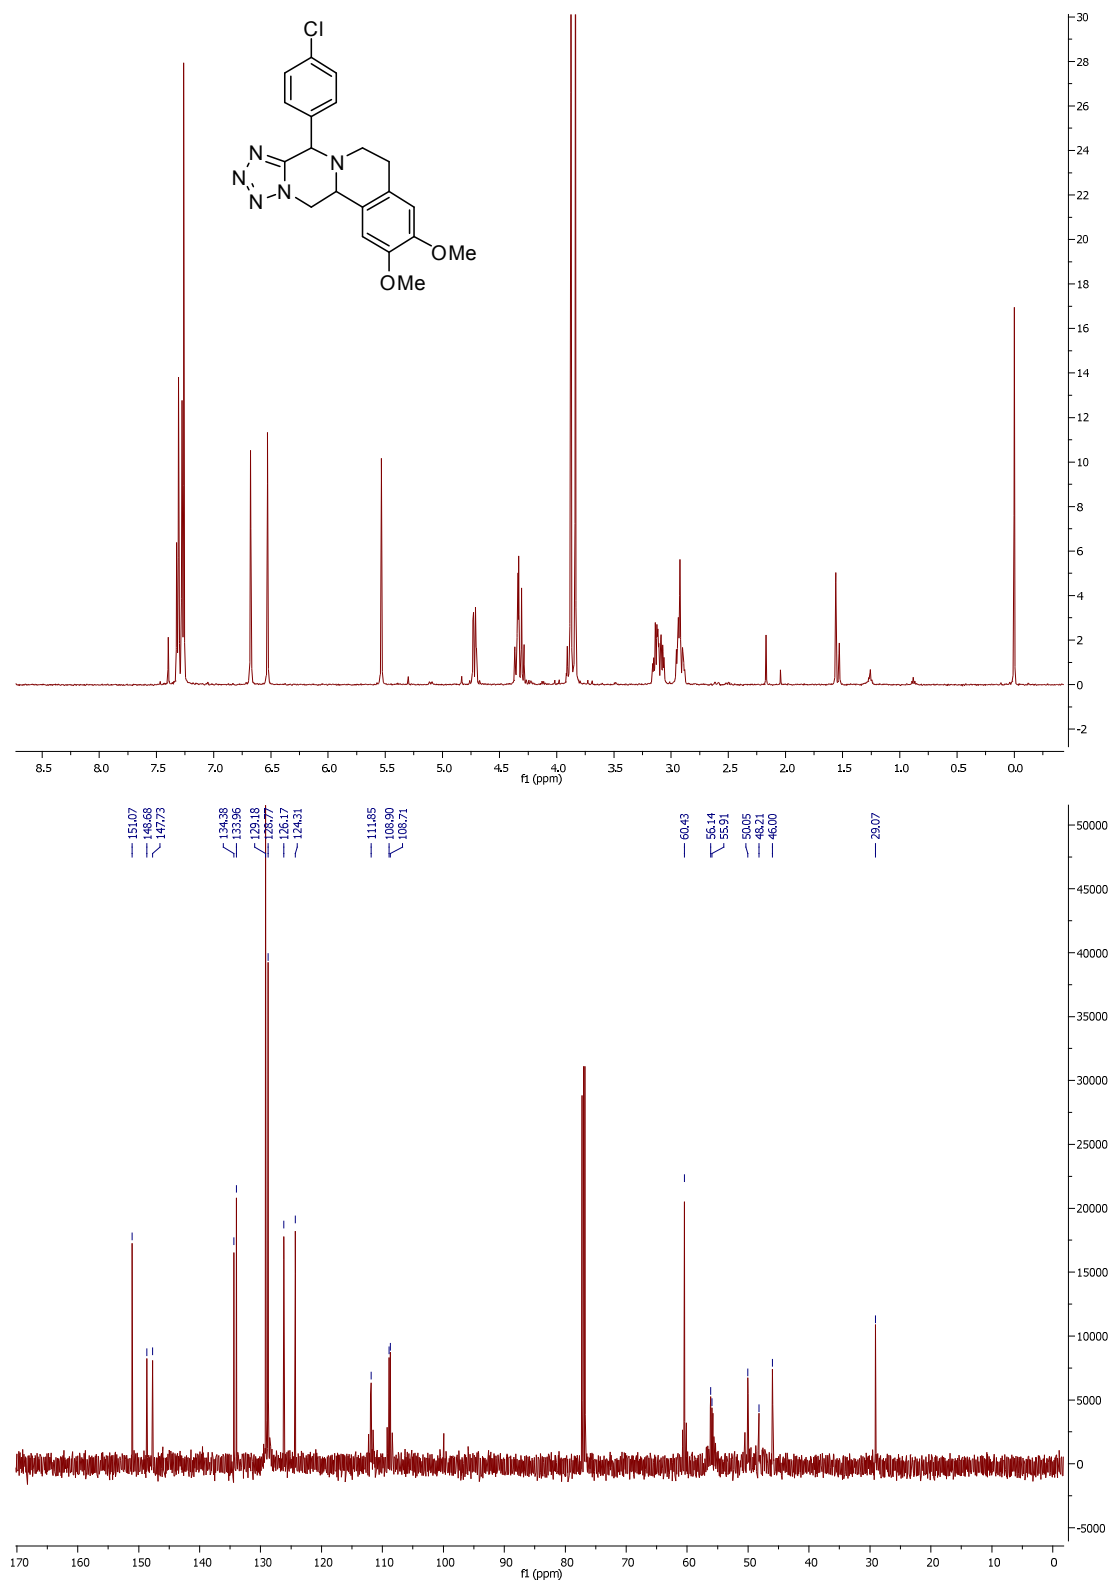

PHP030\_1\_Silica\_4.6X250\_MeOH\_5-30%\_6min

PHP030\_1

3: Diode Array  
Range: 1.865e+1

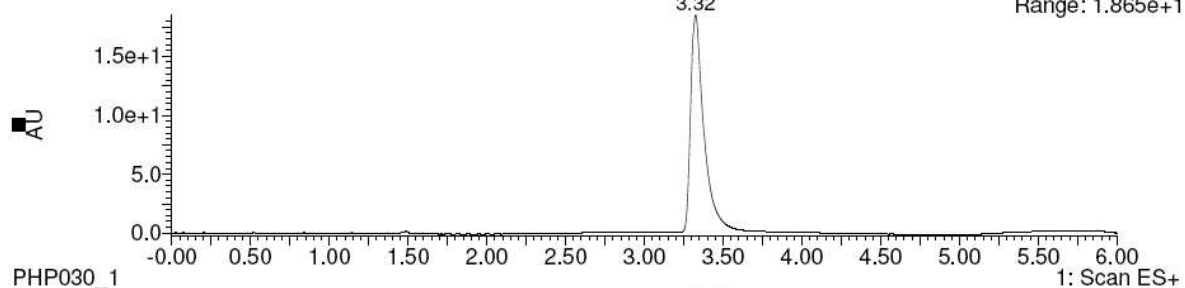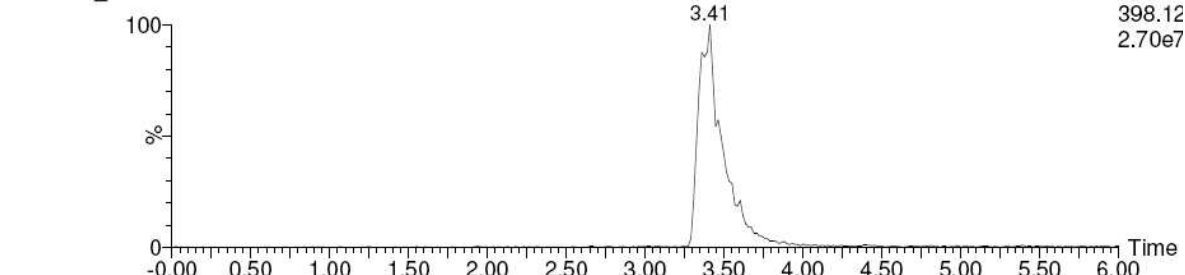

PHP030\_1 197 (3.412)  
1: Scan ES+  
2.57e7

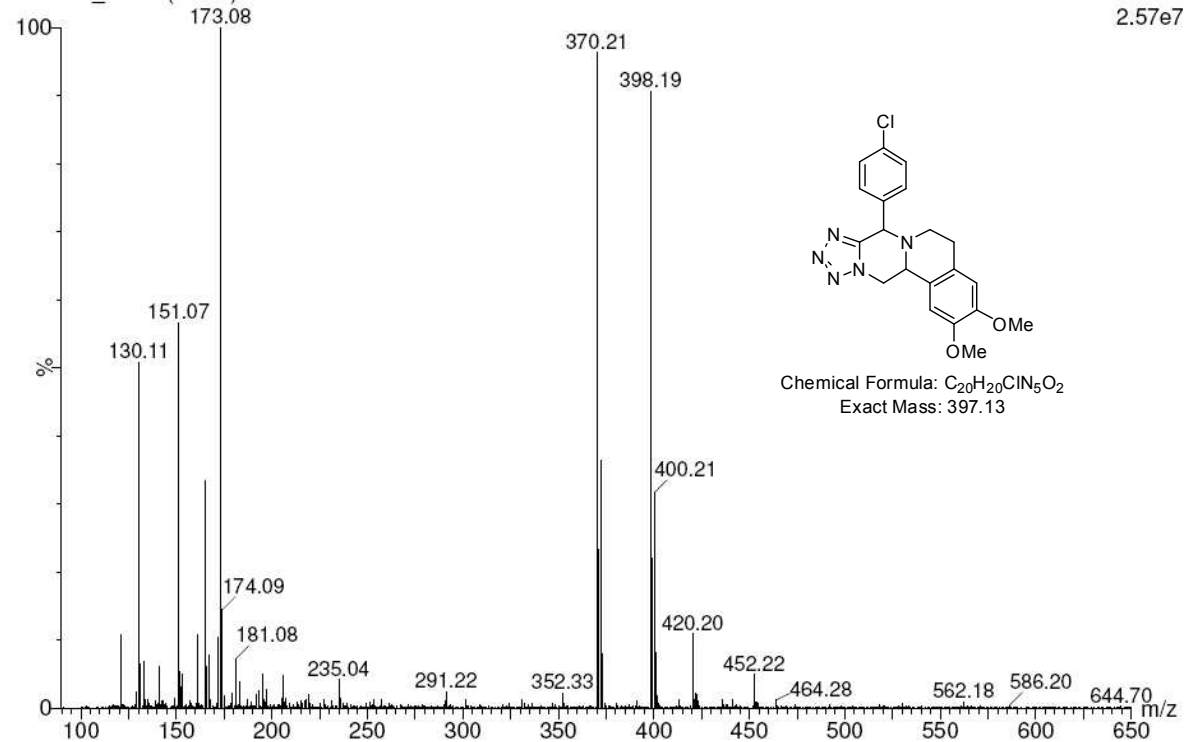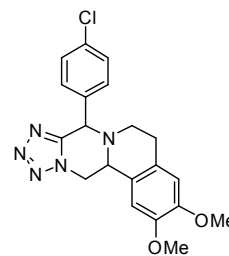

Chemical Formula: C<sub>20</sub>H<sub>20</sub>ClN<sub>5</sub>O<sub>2</sub>  
Exact Mass: 397.13

**14c: 1-(1-(2,2-dimethoxyethyl)-1H-tetrazol-5-yl)-N-(3,4-dimethoxyphenethyl)cyclohexanamine**

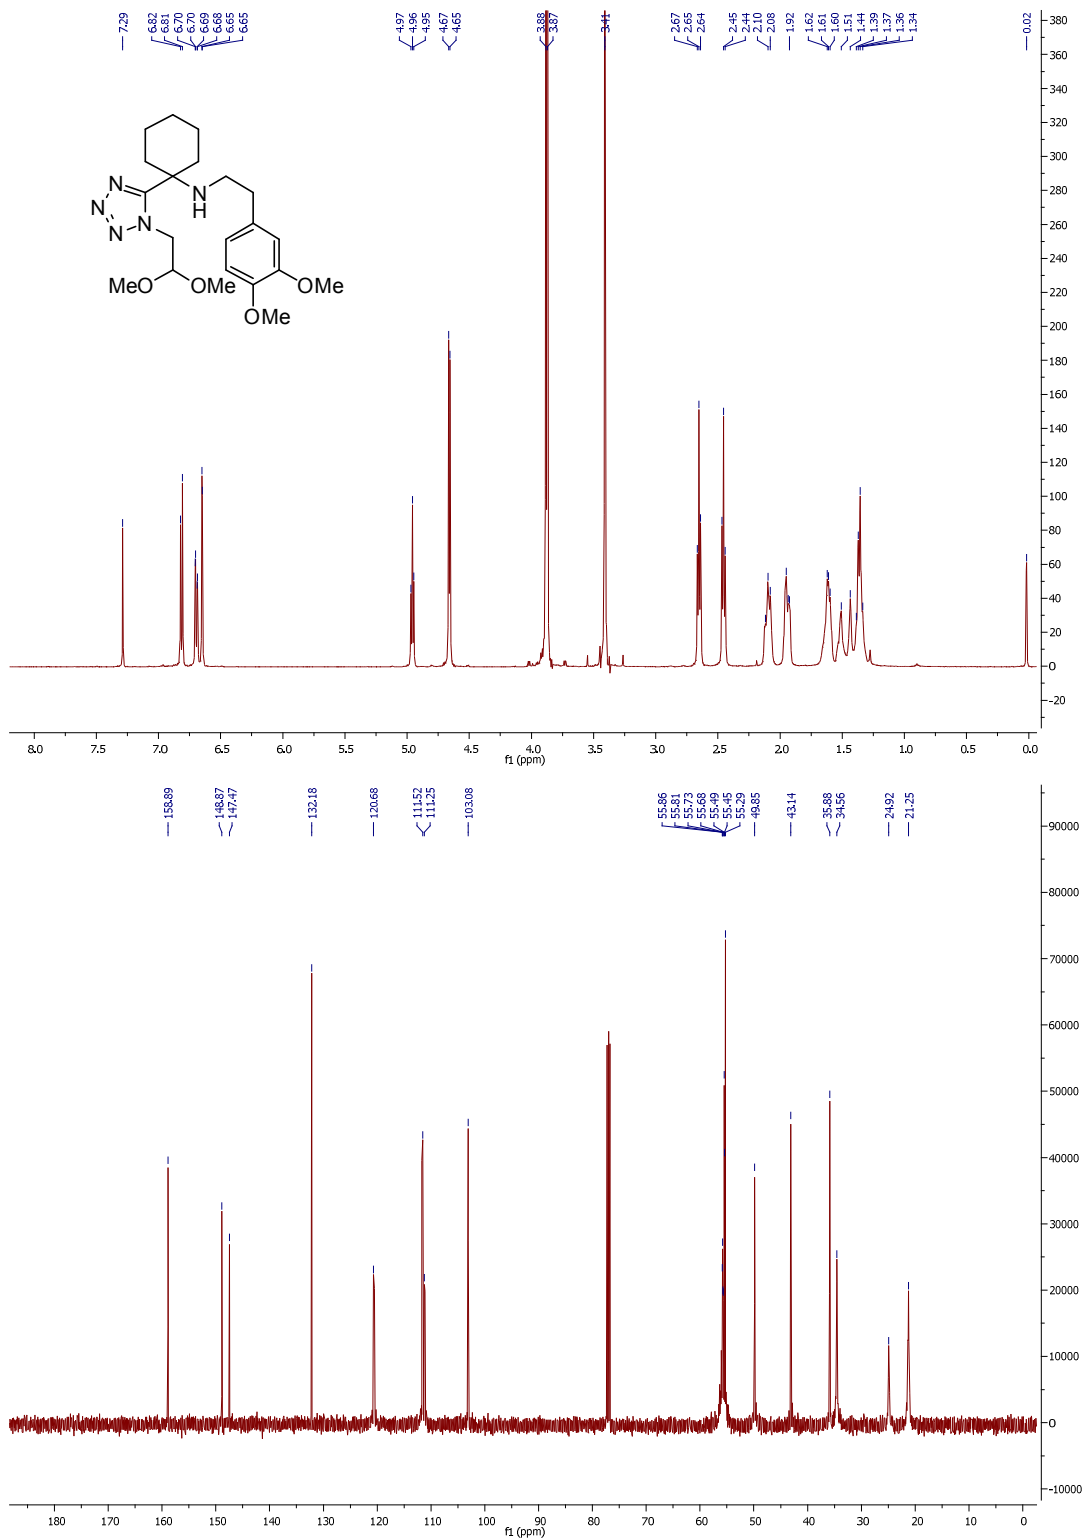

PHP035\_1\_Silica\_4.6X250\_MeOH\_5-30%\_6min

PHP035\_1

3: Diode Array  
Range: 2.261e+1

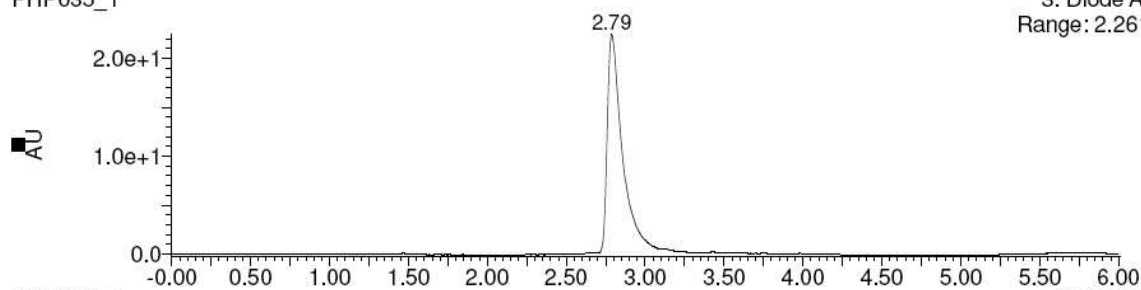

PHP035\_1

1: Scan ES+  
420.25  
3.10e7

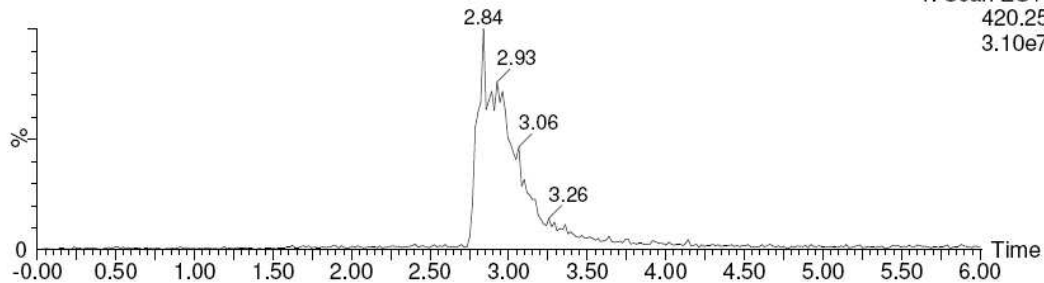

PHP035\_1 165 (2.857)

1: Scan ES+  
6.88e7

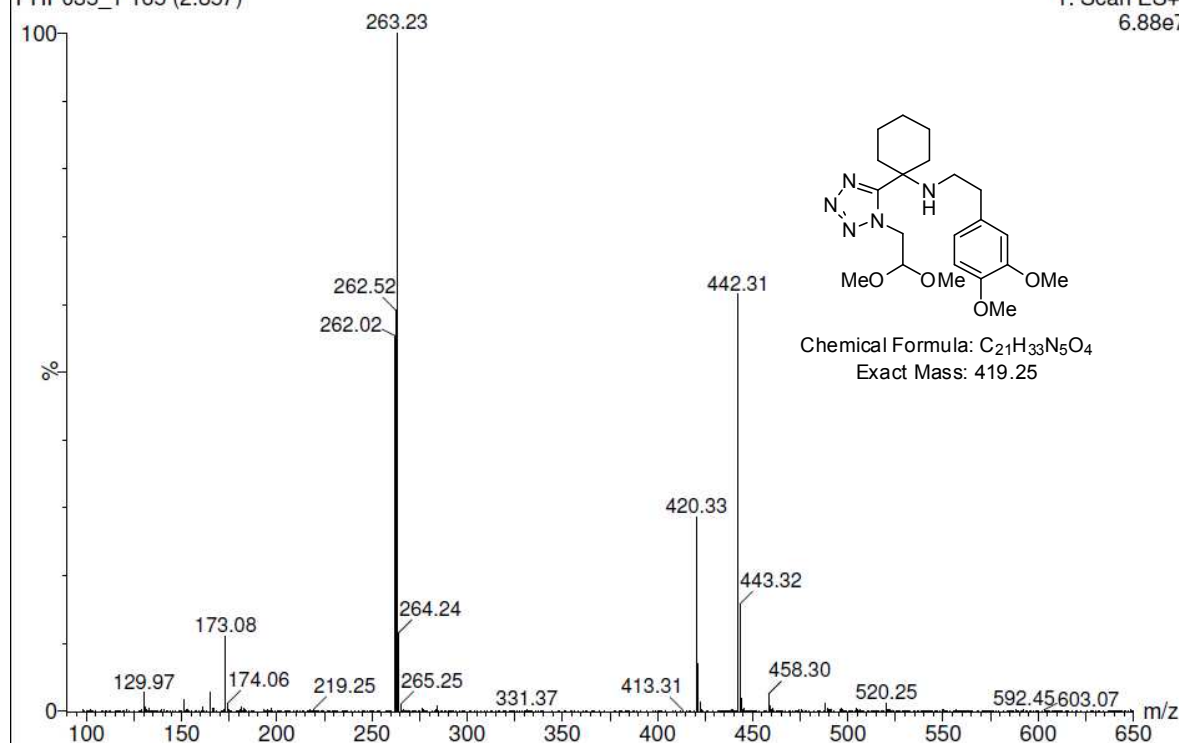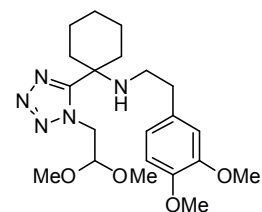

Chemical Formula: C<sub>21</sub>H<sub>33</sub>N<sub>5</sub>O<sub>4</sub>  
Exact Mass: 419.25

**4c: 2',3'-dimethoxy-5',6',13',13a'-tetrahydrospiro[cyclohexane-1,8'-tetrazolo  
[1',5':4,5]pyrazino[2,1-a]isoquinoline]**

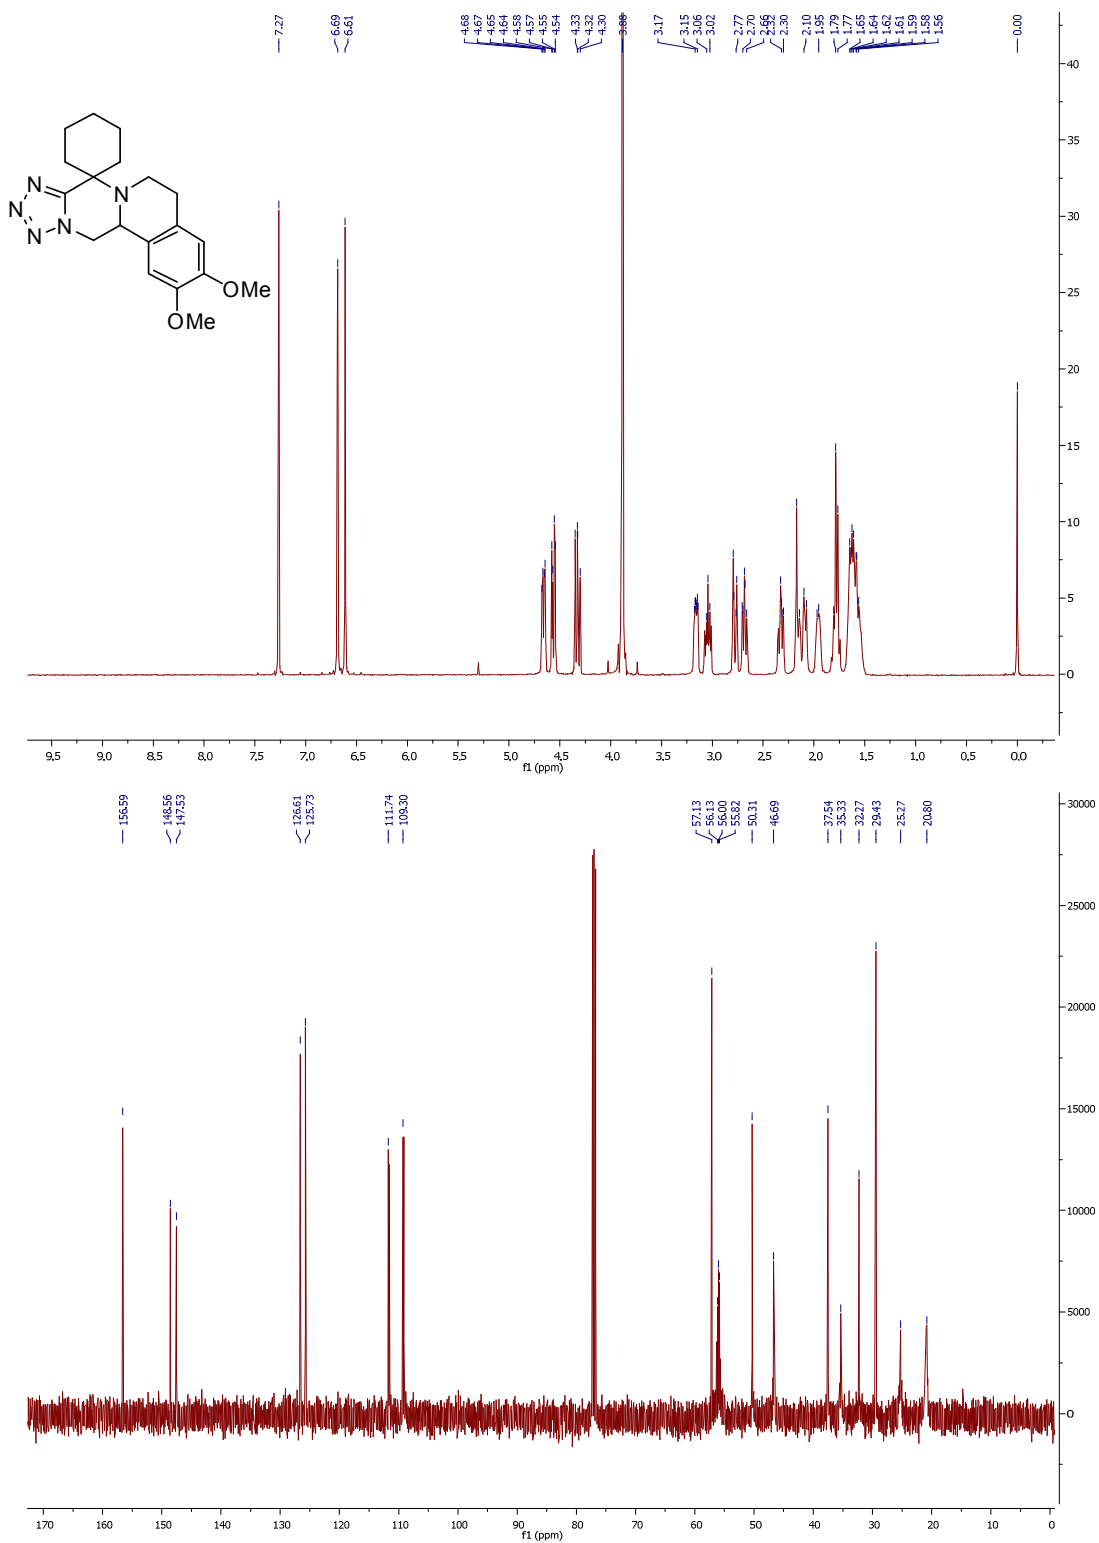

PHP039\_1\_Silica\_4.6X250\_MeOH\_5-30%\_6min

PHP039\_1

3: Diode Array  
Range: 8.24

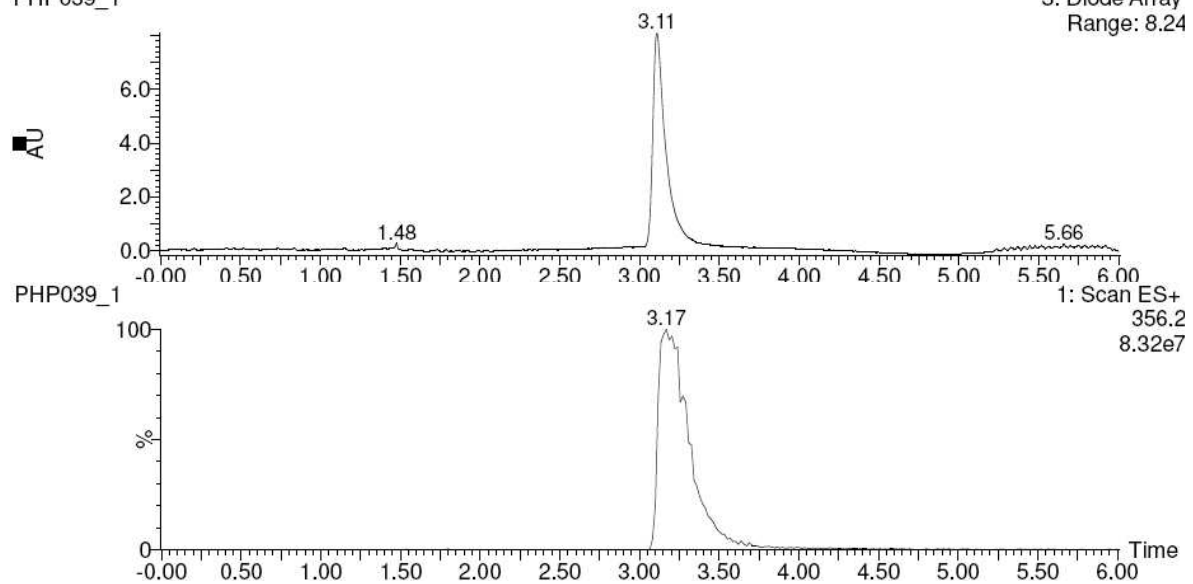

PHP039\_1 182 (3.152)

1: Scan ES+  
8.14e7

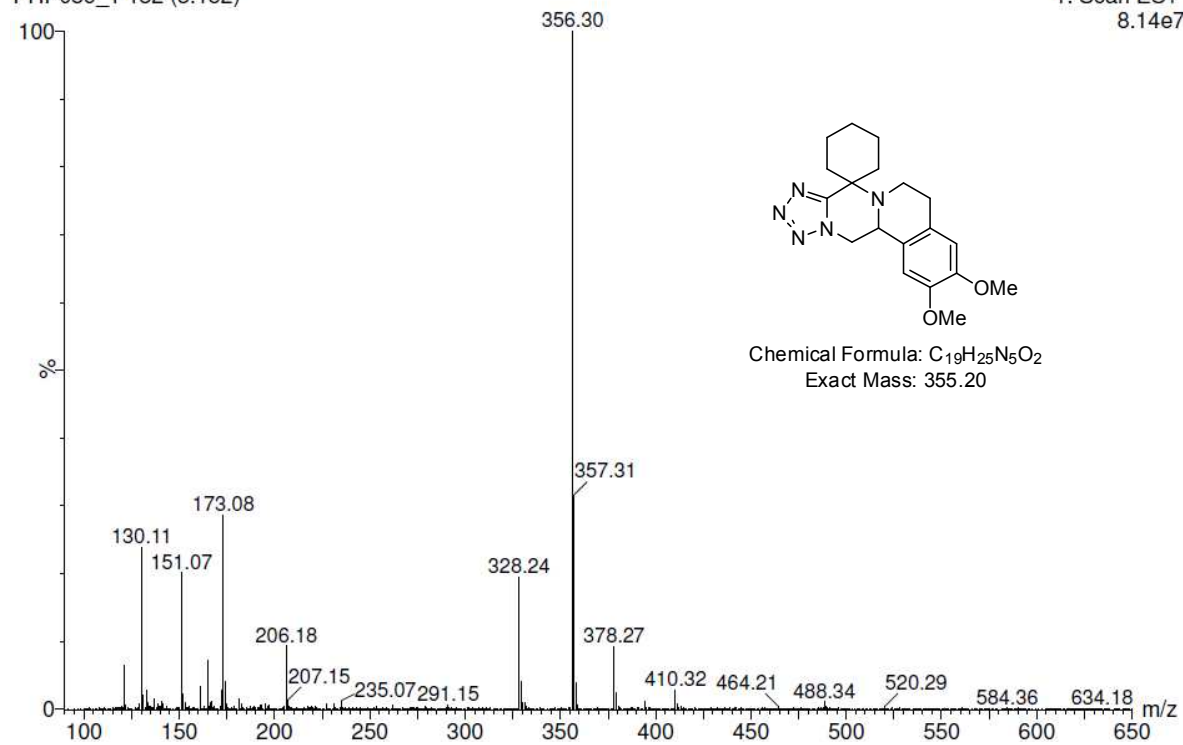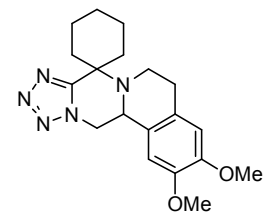

Chemical Formula: C<sub>19</sub>H<sub>25</sub>N<sub>5</sub>O<sub>2</sub>  
Exact Mass: 355.20



**14d: N-(2-(1H-indol-3-yl)ethyl)-1-(1-(2,2-dimethoxyethyl)-1H-tetrazol-5-yl) cyclohexanamine.**

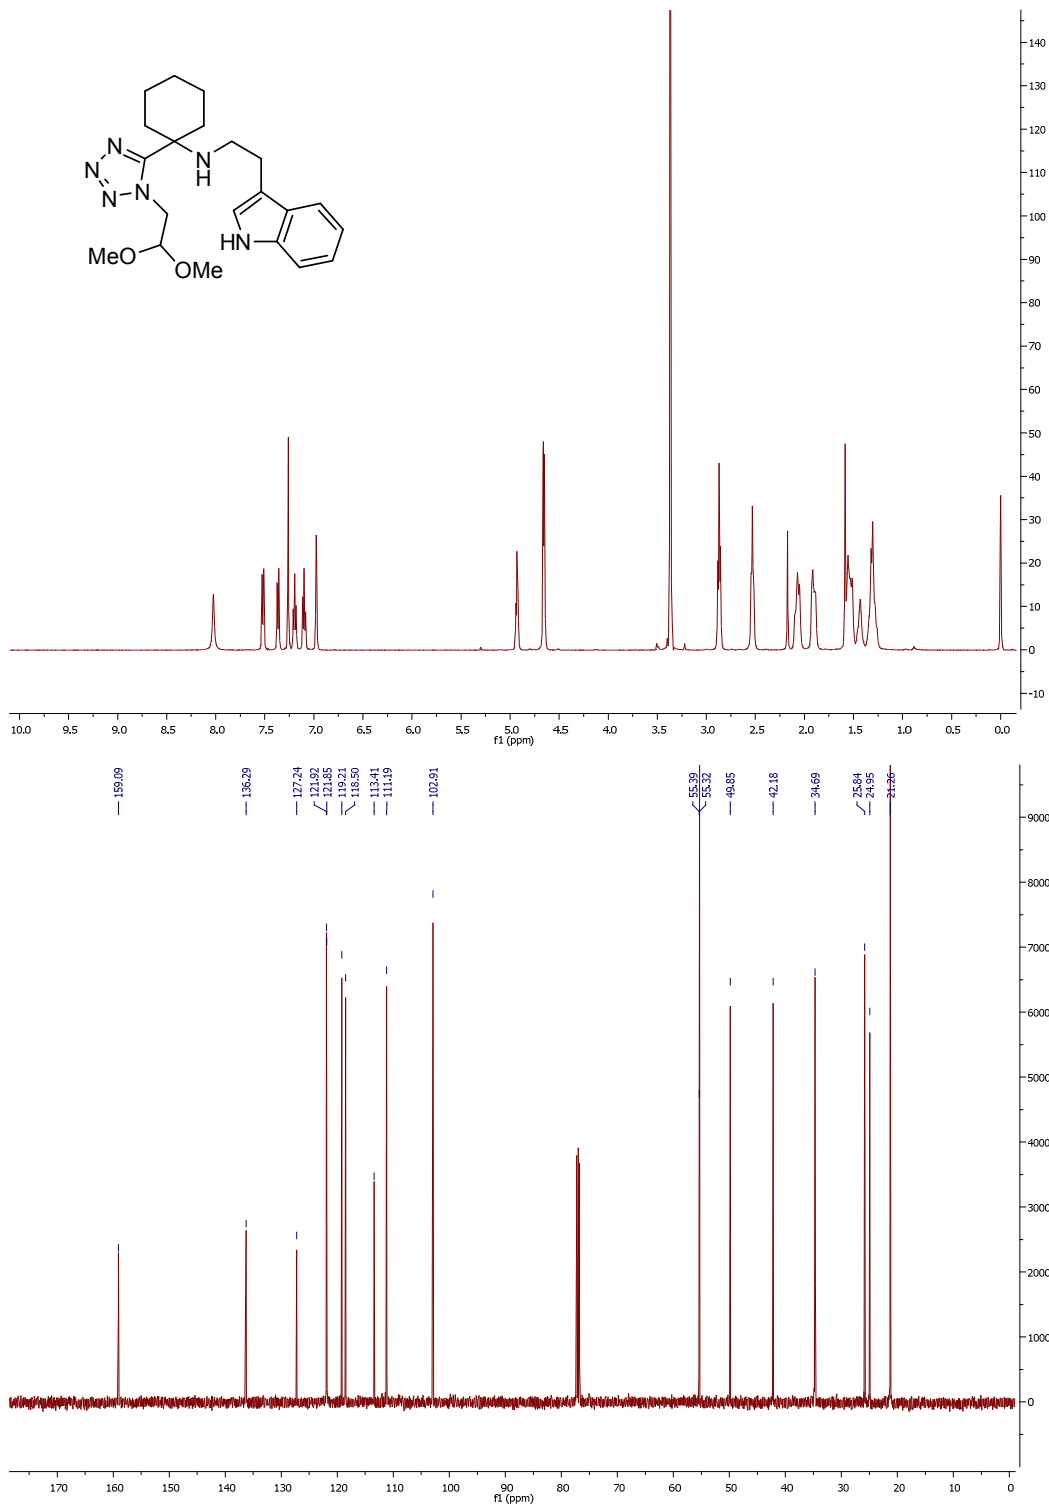

PHP080\_1\_Silica\_4.6X250\_MeOH\_5-30%\_6min

PHP080\_1

3: Diode Array  
Range: 8.213e+1

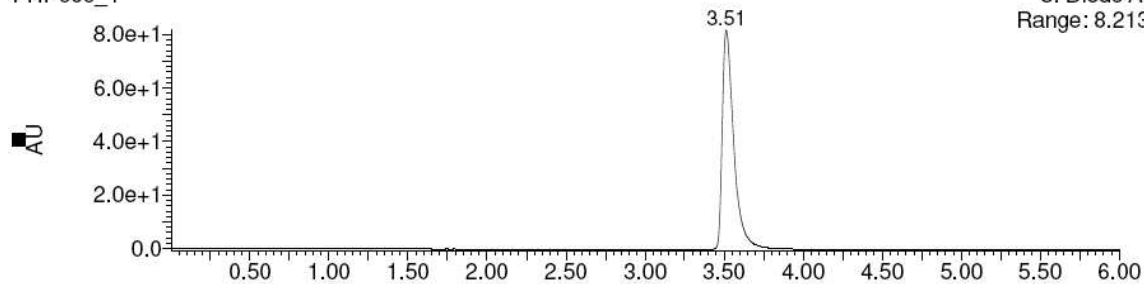

PHP080\_1

2: Scan ES-  
397.24  
1.69e7

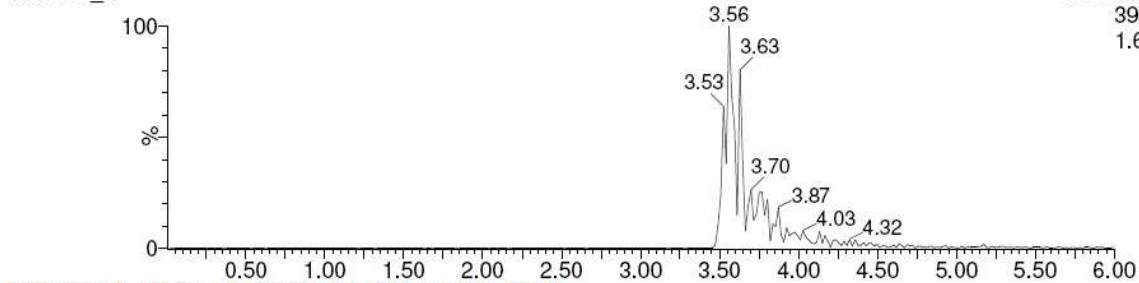

PHP080\_1\_Silica\_4.6X250\_MeOH\_5-30%\_6min

PHP080\_1 206 (3.577)

2: Scan ES-  
1.15e7

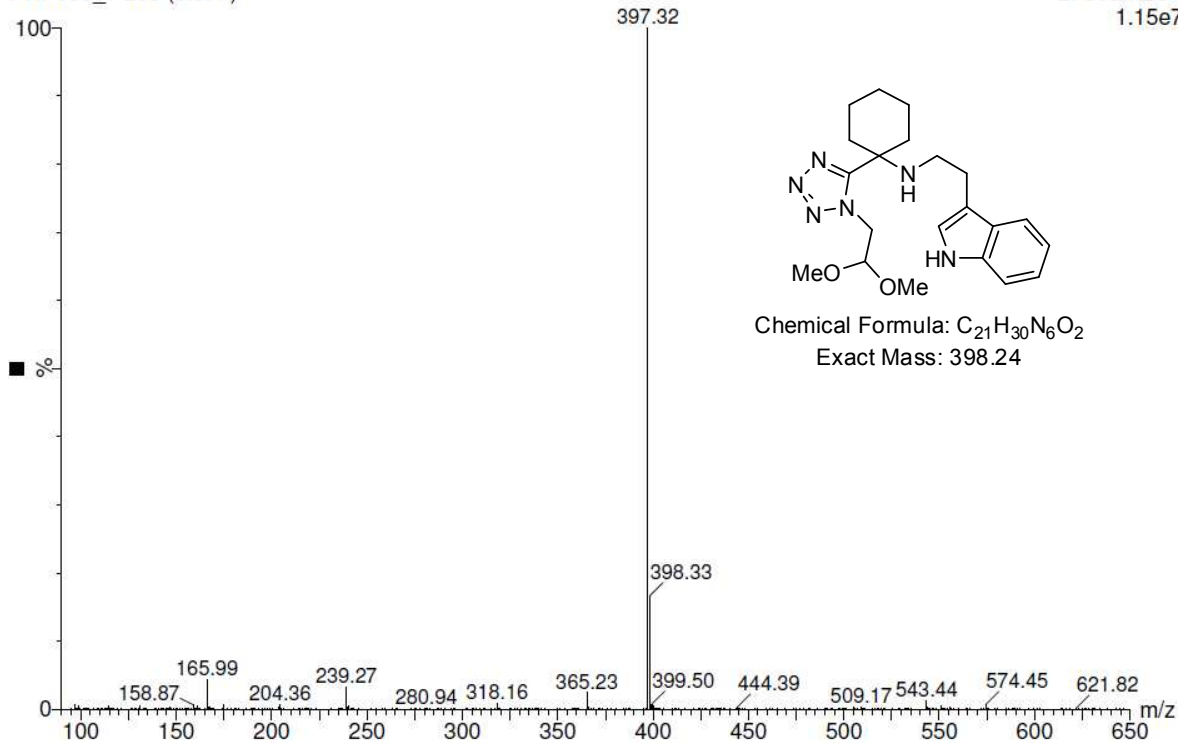

**4d: 7',12',12b',13'-tetrahydro-6'H-spiro[cyclohexane-1,4'-tetrazolo[1'',5'':4',5']  
pyrazino[1',2':1,2]pyrido[3,4-b]indole]**

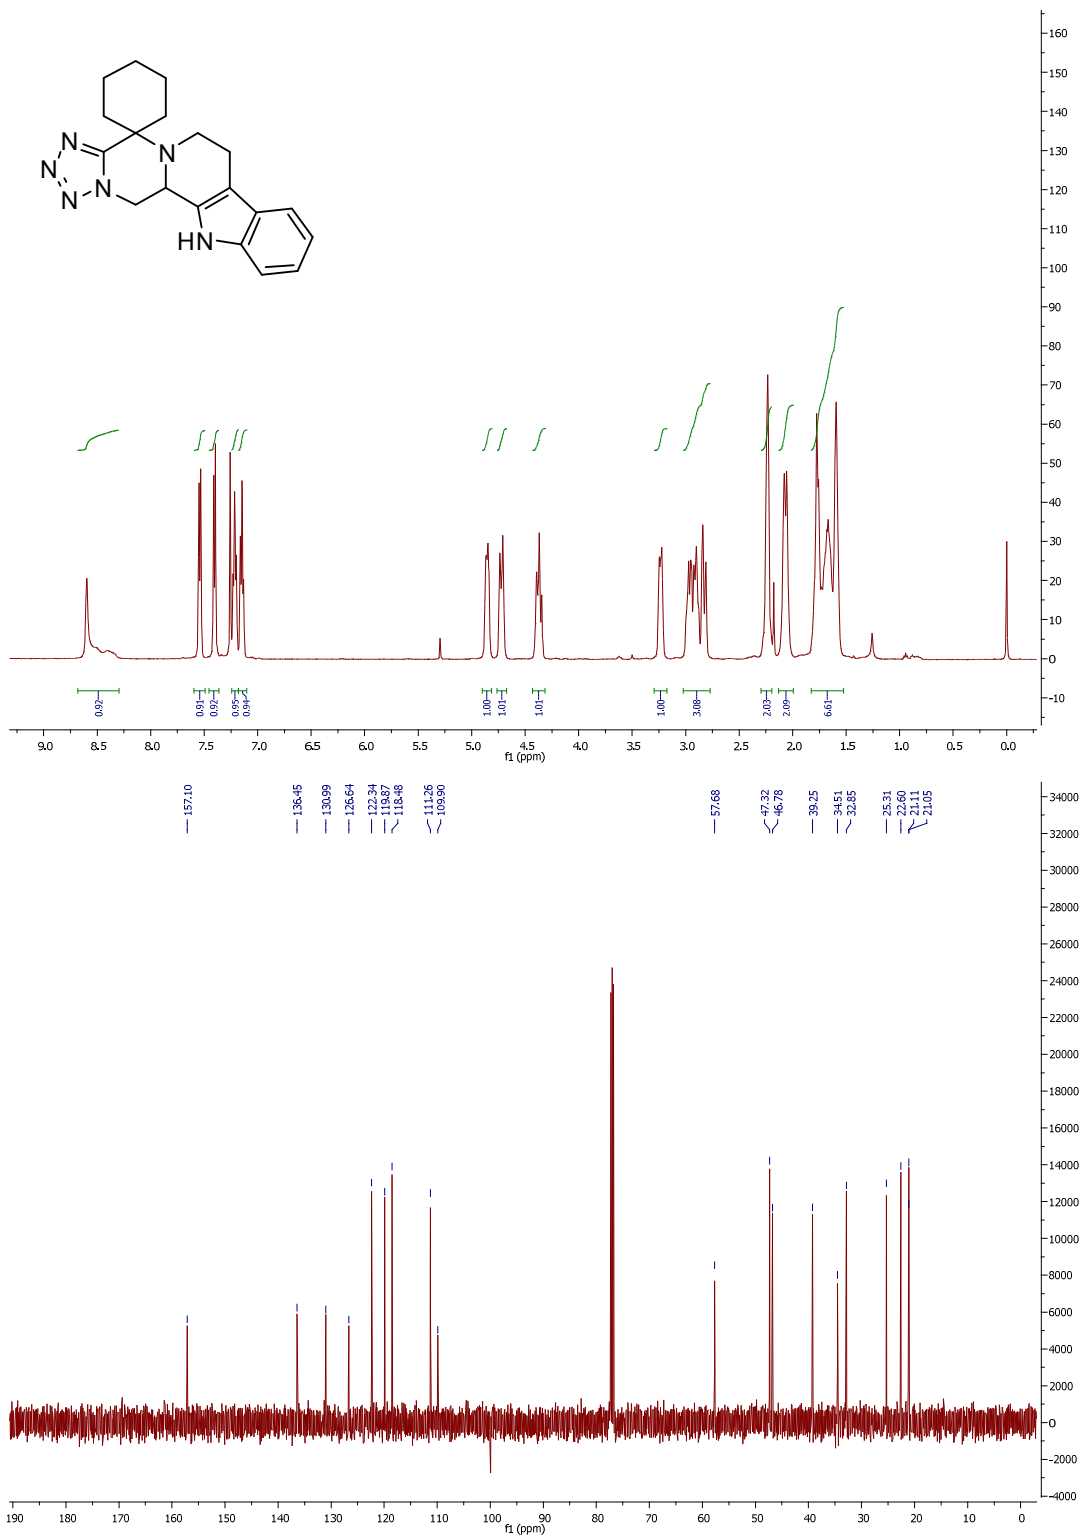

PHP083\_1\_Silica\_4.6X250\_MeOH\_5-30%\_6min

PHP083\_1

3: Diode Array  
Range: 7.866e+1

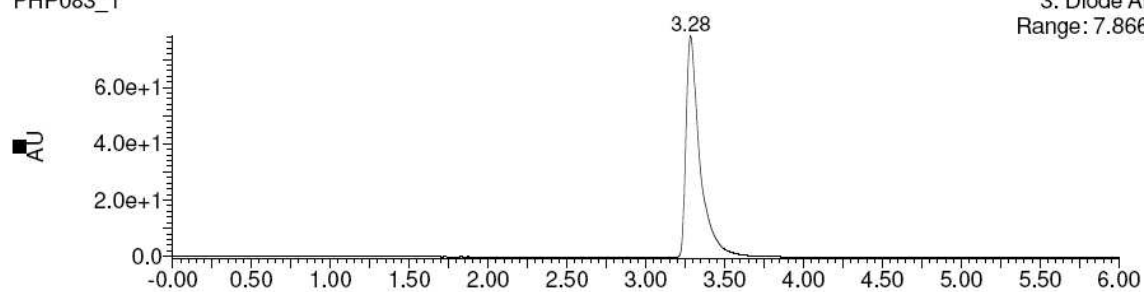

PHP083\_1

2: Scan ES-  
333.19  
4.71e7

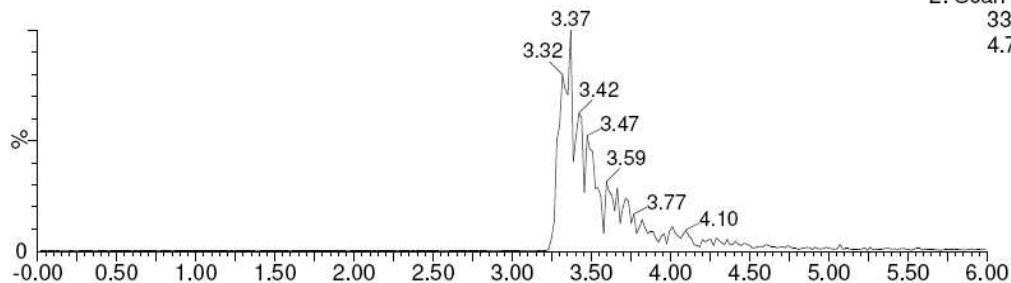

PHP083\_1\_Silica\_4.6X250\_MeOH\_5-30%\_6min

PHP083\_1 192 (3.334)

2: Scan ES-  
346e7

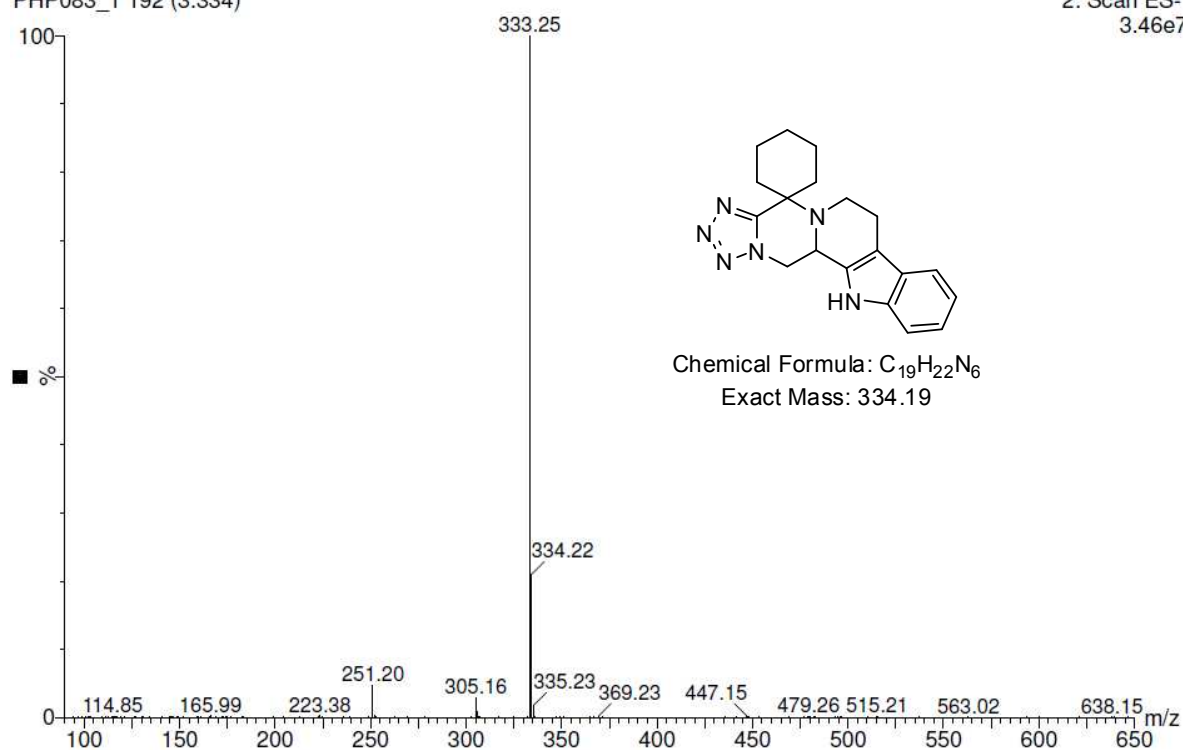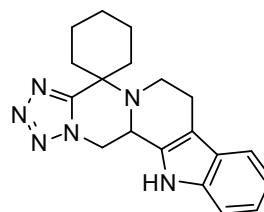

Chemical Formula: C<sub>19</sub>H<sub>22</sub>N<sub>6</sub>

Exact Mass: 334.19

**14e: N-((1-(2,2-dimethoxyethyl)-1H-tetrazol-5-yl)(4-nitrophenyl)methyl)-2-(1H-indol-3-yl)ethanamine**

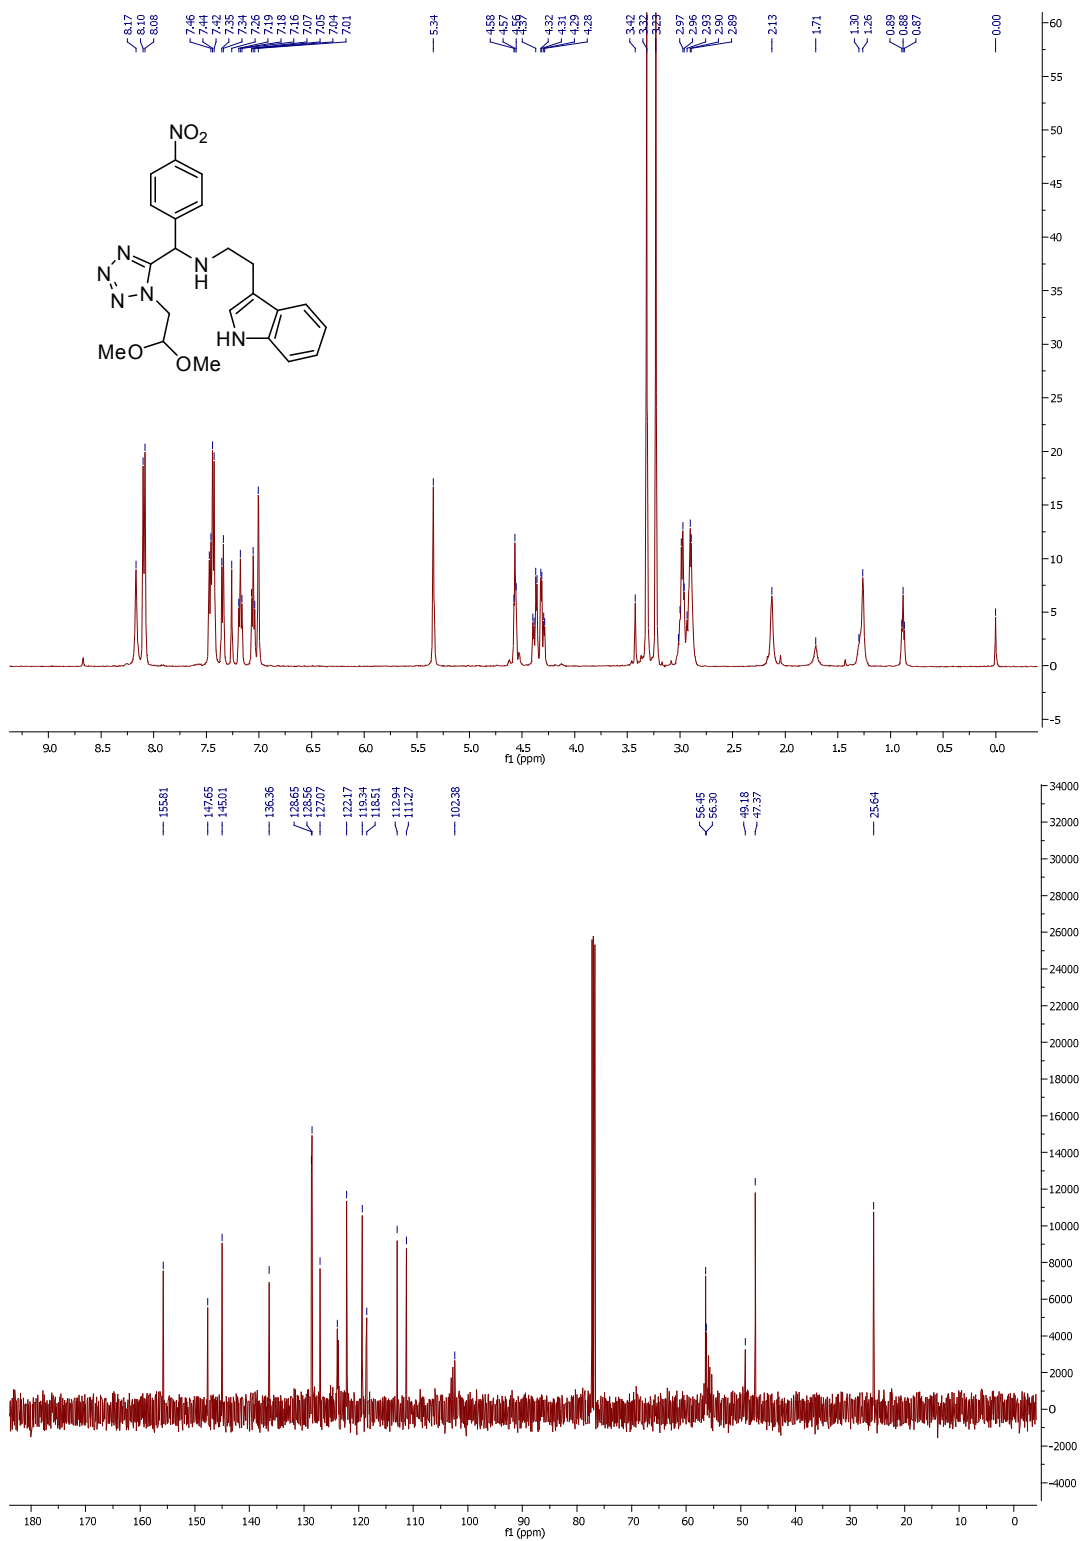

PHP071\_1\_Silica\_4.6X250\_MeOH\_5-30%\_6min

PHP071\_1

3: Diode Array  
Range: 1.512e+2

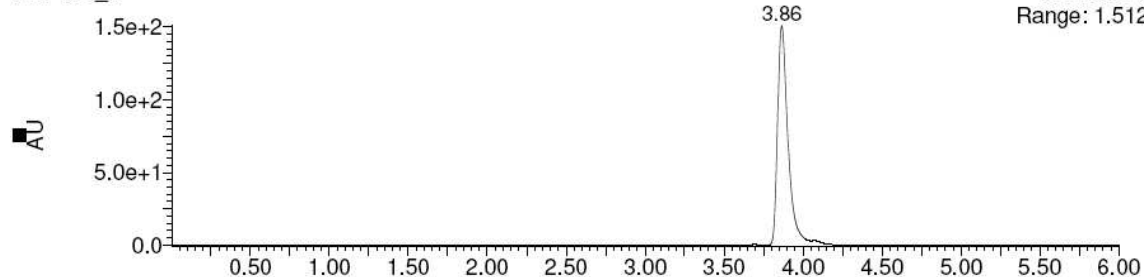

PHP071\_1

1: Scan ES+  
452.1  
1.68e7

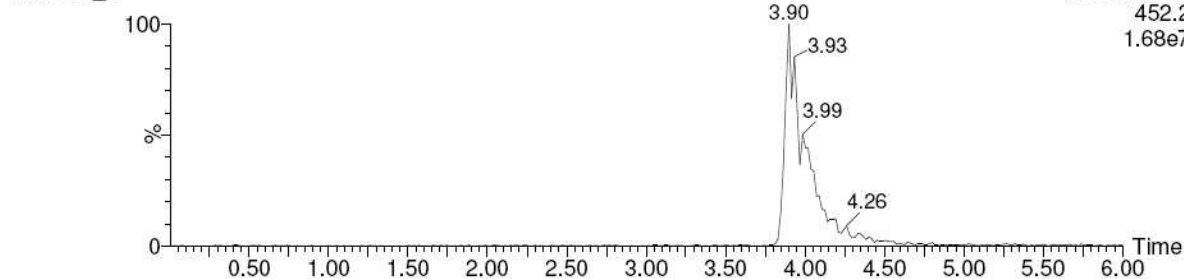

PHP071\_1 227 (3.933)

1: Scan ES+  
6.13e7

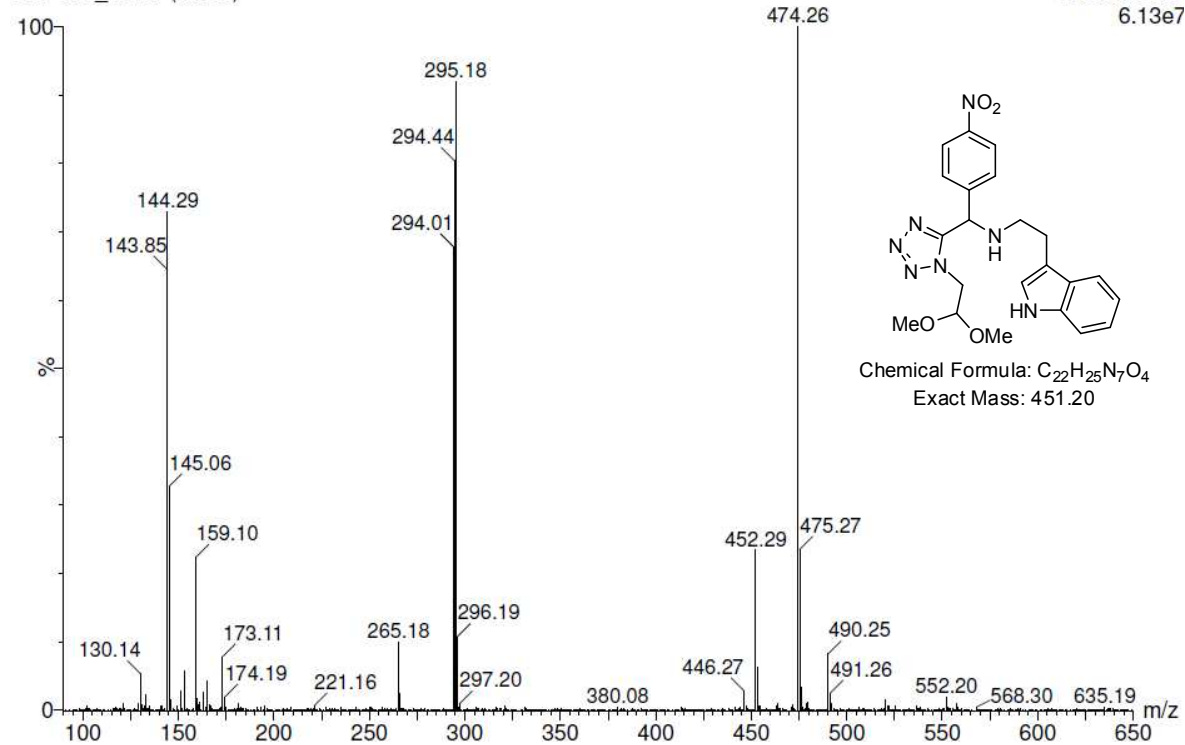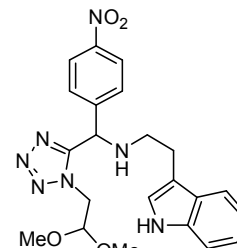

Chemical Formula: C<sub>22</sub>H<sub>25</sub>N<sub>7</sub>O<sub>4</sub>  
Exact Mass: 451.20

**4e: 4-(4-nitrophenyl)-4,6,7,12,12b,13-hexahydro-tetrazolo[1'',5'':4',5']pyrazino[1',2':1,2]pyrido[3,4-b]indole**

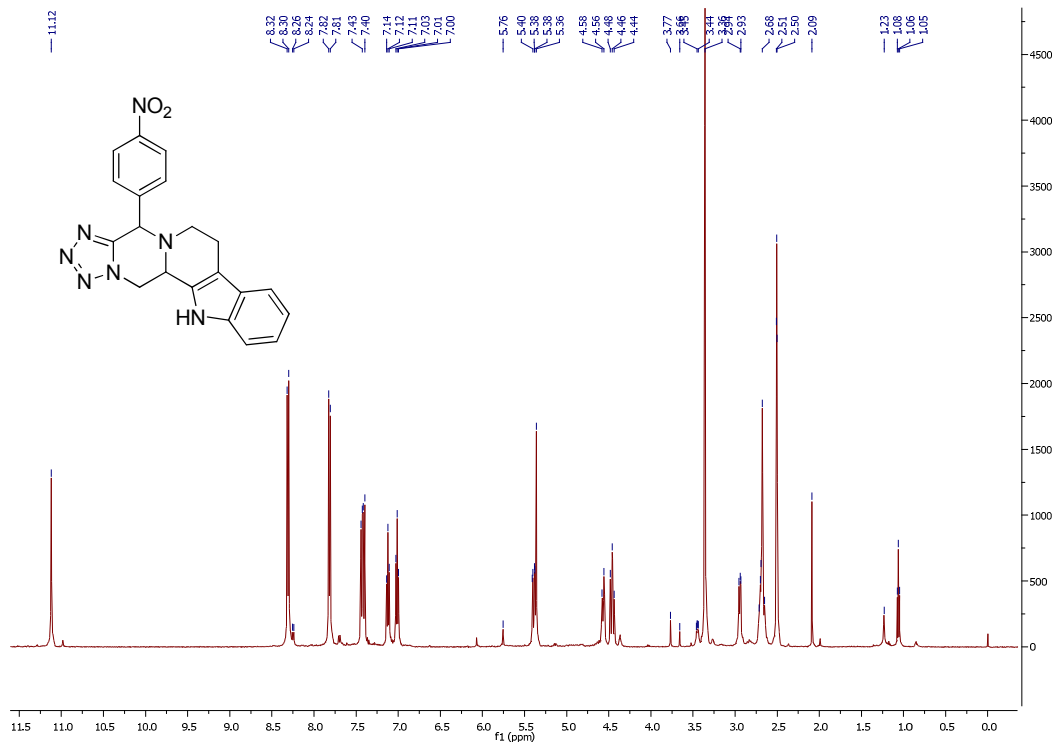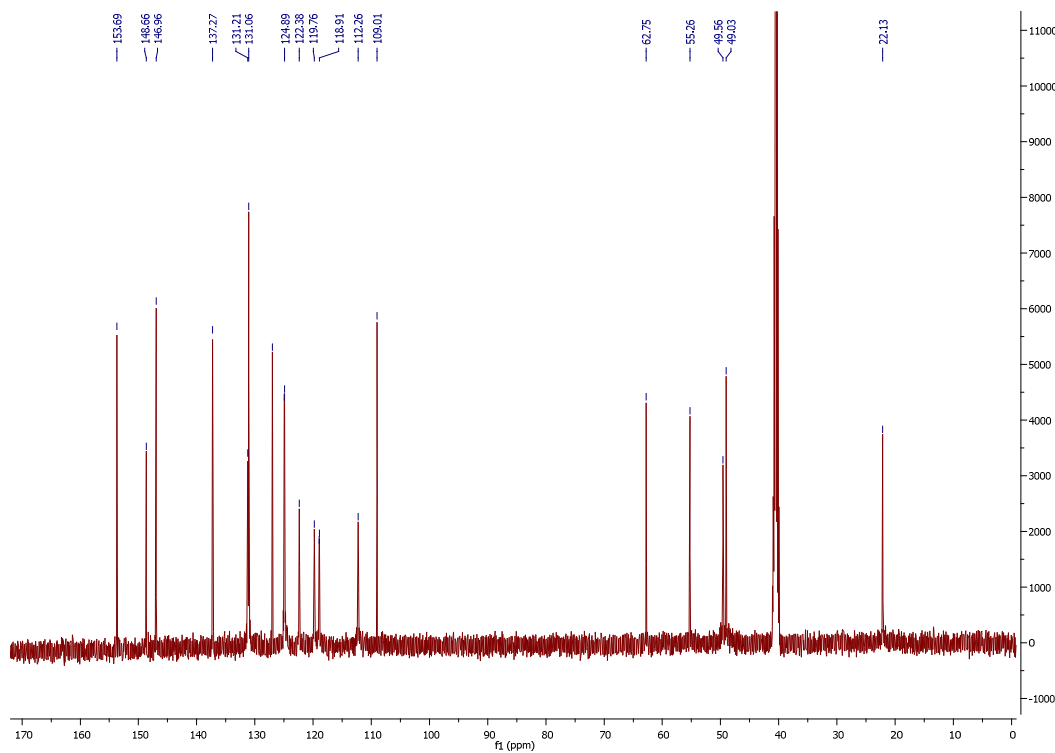

PHP074\_1\_Silica\_4.6X250\_MeOH\_5-30%\_6min

PHP074\_1

3: Diode Array  
Range: 6.715

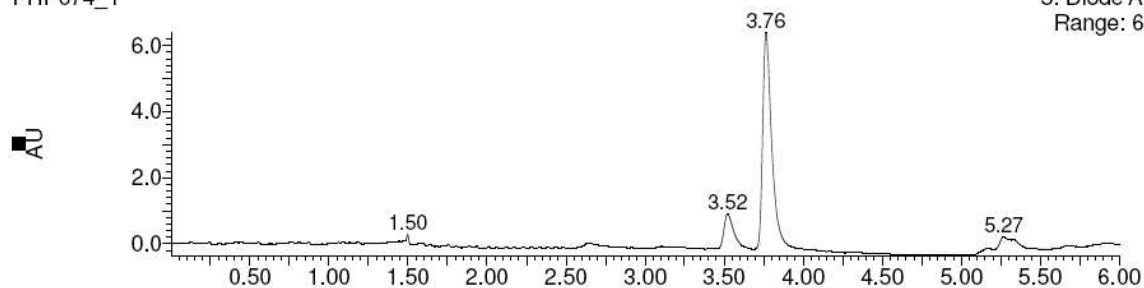

PHP074\_1

2: Scan ES-  
386.14  
1.24e7

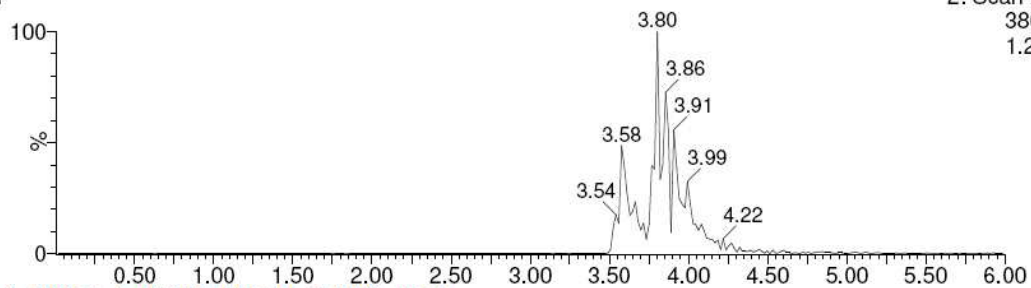

PHP074\_1\_Silica\_4.6X250\_MeOH\_5-30%\_6min

PHP074\_1 219 (3.803)

2: Scan ES-  
1.24e7

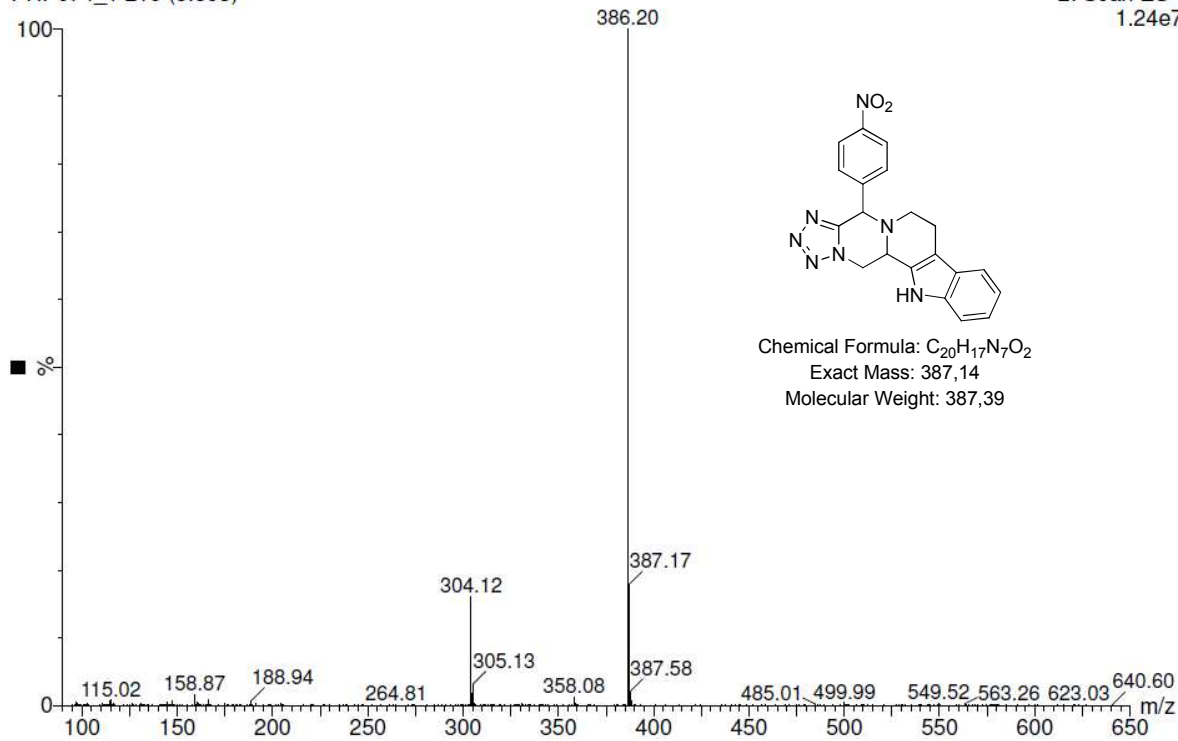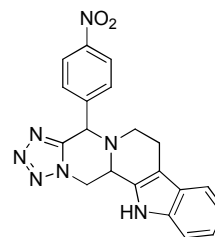

Chemical Formula: C<sub>20</sub>H<sub>17</sub>N<sub>7</sub>O<sub>2</sub>  
Exact Mass: 387.14  
Molecular Weight: 387.39



**14f: N-(2-(1H-indol-3-yl)ethyl)-1-benzyl-4-(1-(2,2-dimethoxyethyl)-1H-tetrazol-5-yl)piperidin-4-amine**

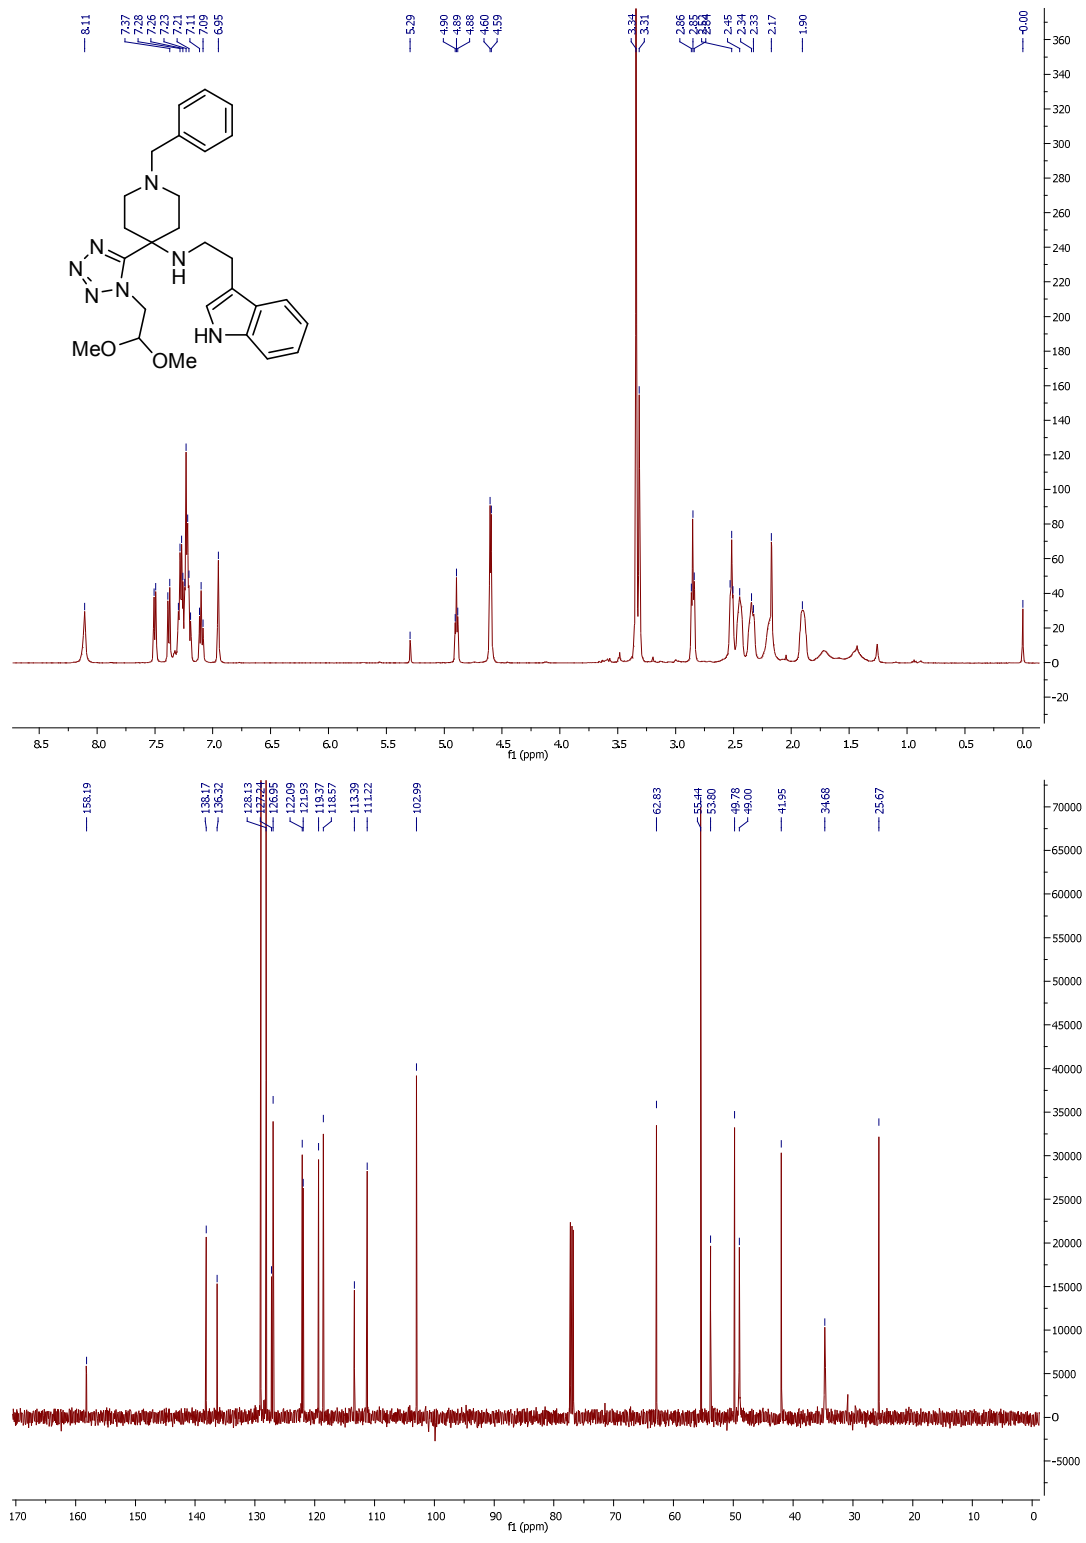

PHP-085\_r2\_Col3\_Sol1\_20-40%\_7min

PHP-085\_r2

3: Diode Array  
Range: 4.104e+1

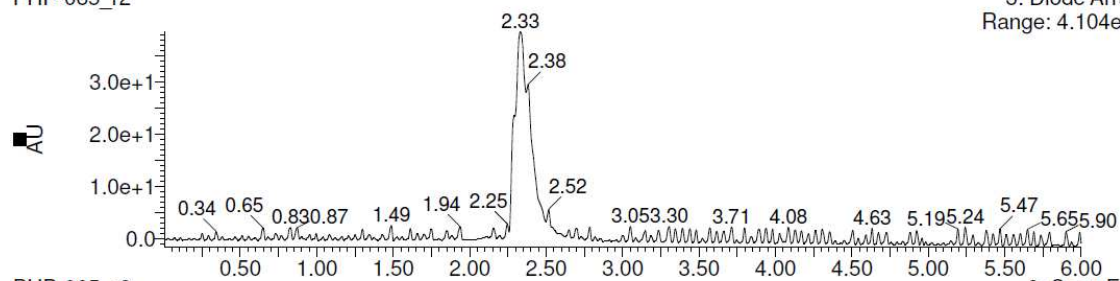

PHP-085\_r2

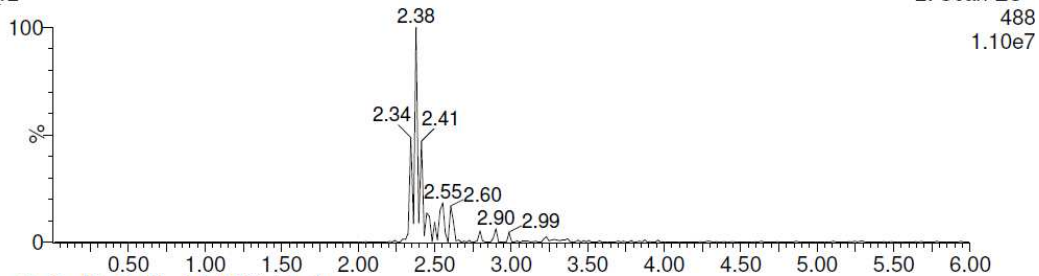

PHP-085\_r2\_Col3\_Sol1\_20-40%\_7min

PHP-085\_r2 137 (2.379) Cm (132:146)

2: Scan ES-  
488  
2.15e6

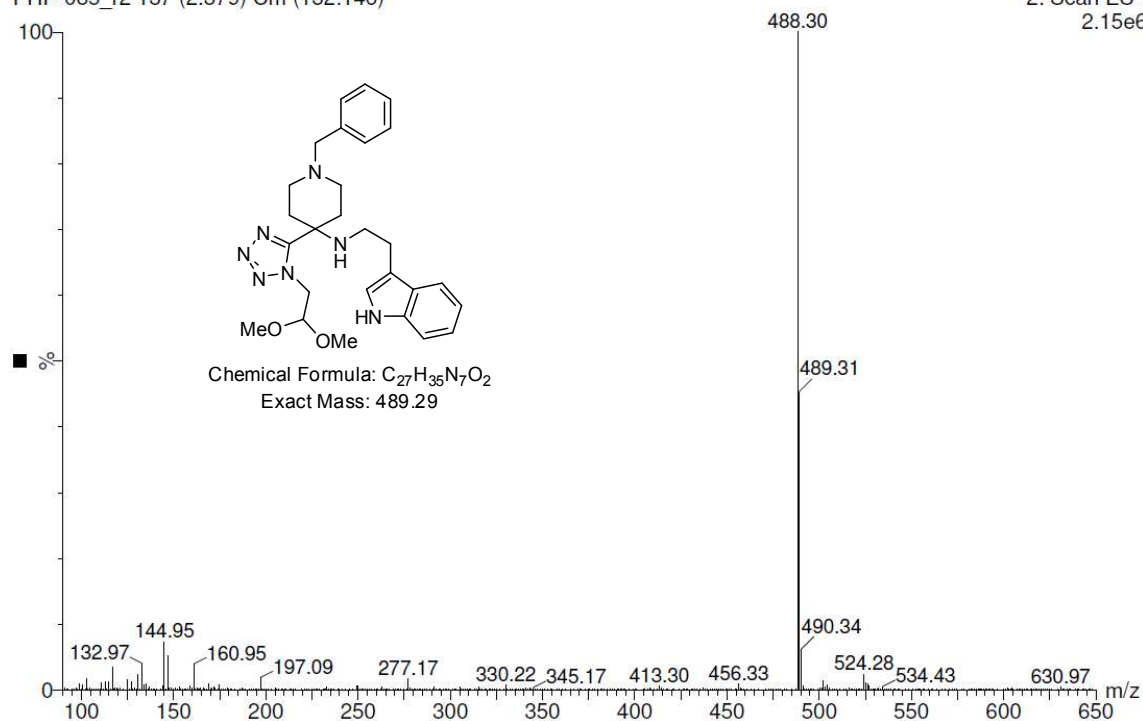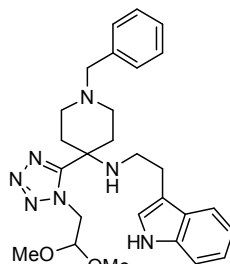

Chemical Formula: C<sub>27</sub>H<sub>35</sub>N<sub>7</sub>O<sub>2</sub>  
Exact Mass: 489.29

**4f: 1-benzyl-7',12',12b',13'-tetrahydro-6'H-spiro[piperidine-4,4'-  
tetrazolo[1'',5'':4',5']pyrazino[1',2':1,2]pyrido[3,4-b]indole]**

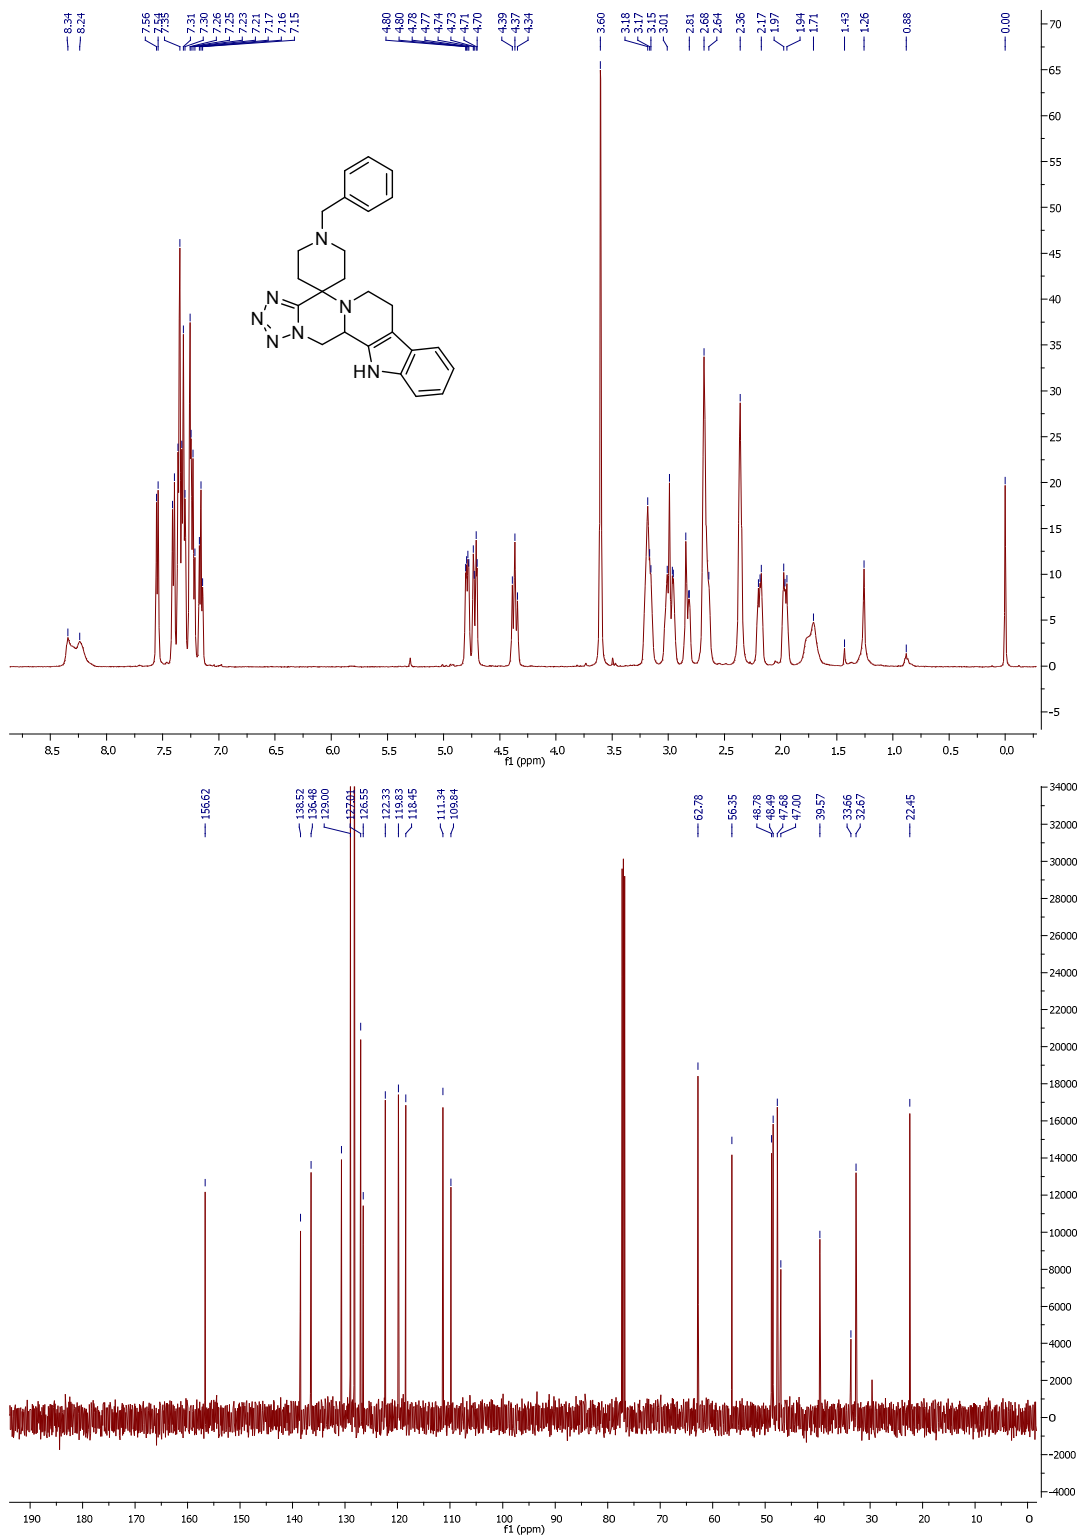

PHP-108\_r1\_Col3\_Sol1\_20-40%\_7min

PHP-108\_r1

3: Diode Array  
Range: 1.616e+1

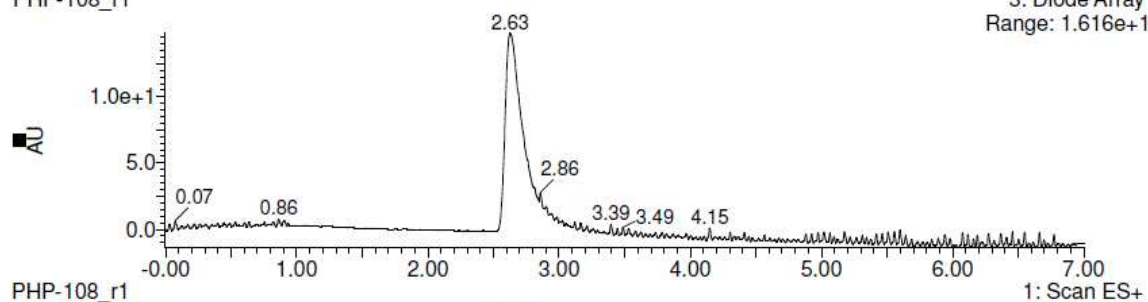

PHP-108\_r1

1: Scan ES+  
426  
7.67e7

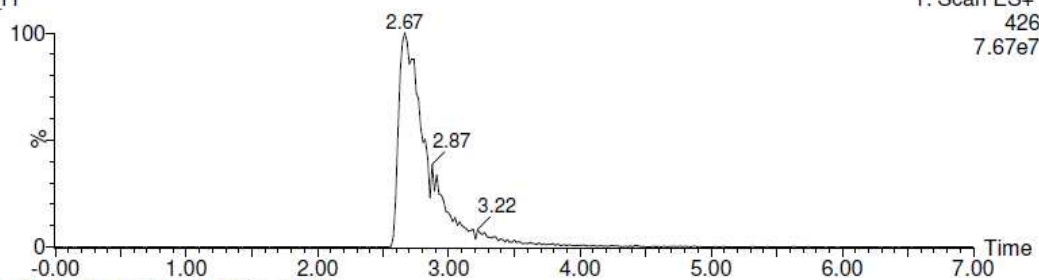

PHP-108\_r1\_Col3\_Sol1\_20-40%\_7min

PHP-108\_r1 154 (2.666) Cm (149:175)

1: Scan ES+  
3.72e7

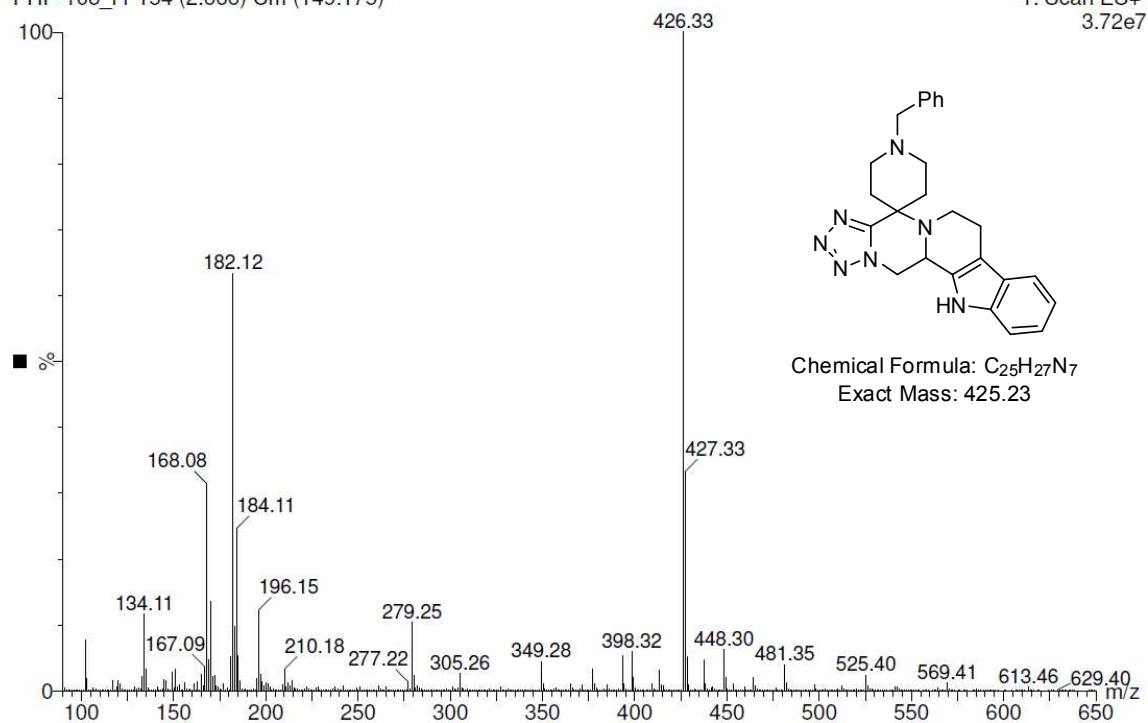

**14g: N-((1-(2,2-dimethoxyethyl)-1H-tetrazol-5-yl)(3,4,5-trimethoxyphenyl)methyl)-2-(1H-indol-3-yl)ethanamine**

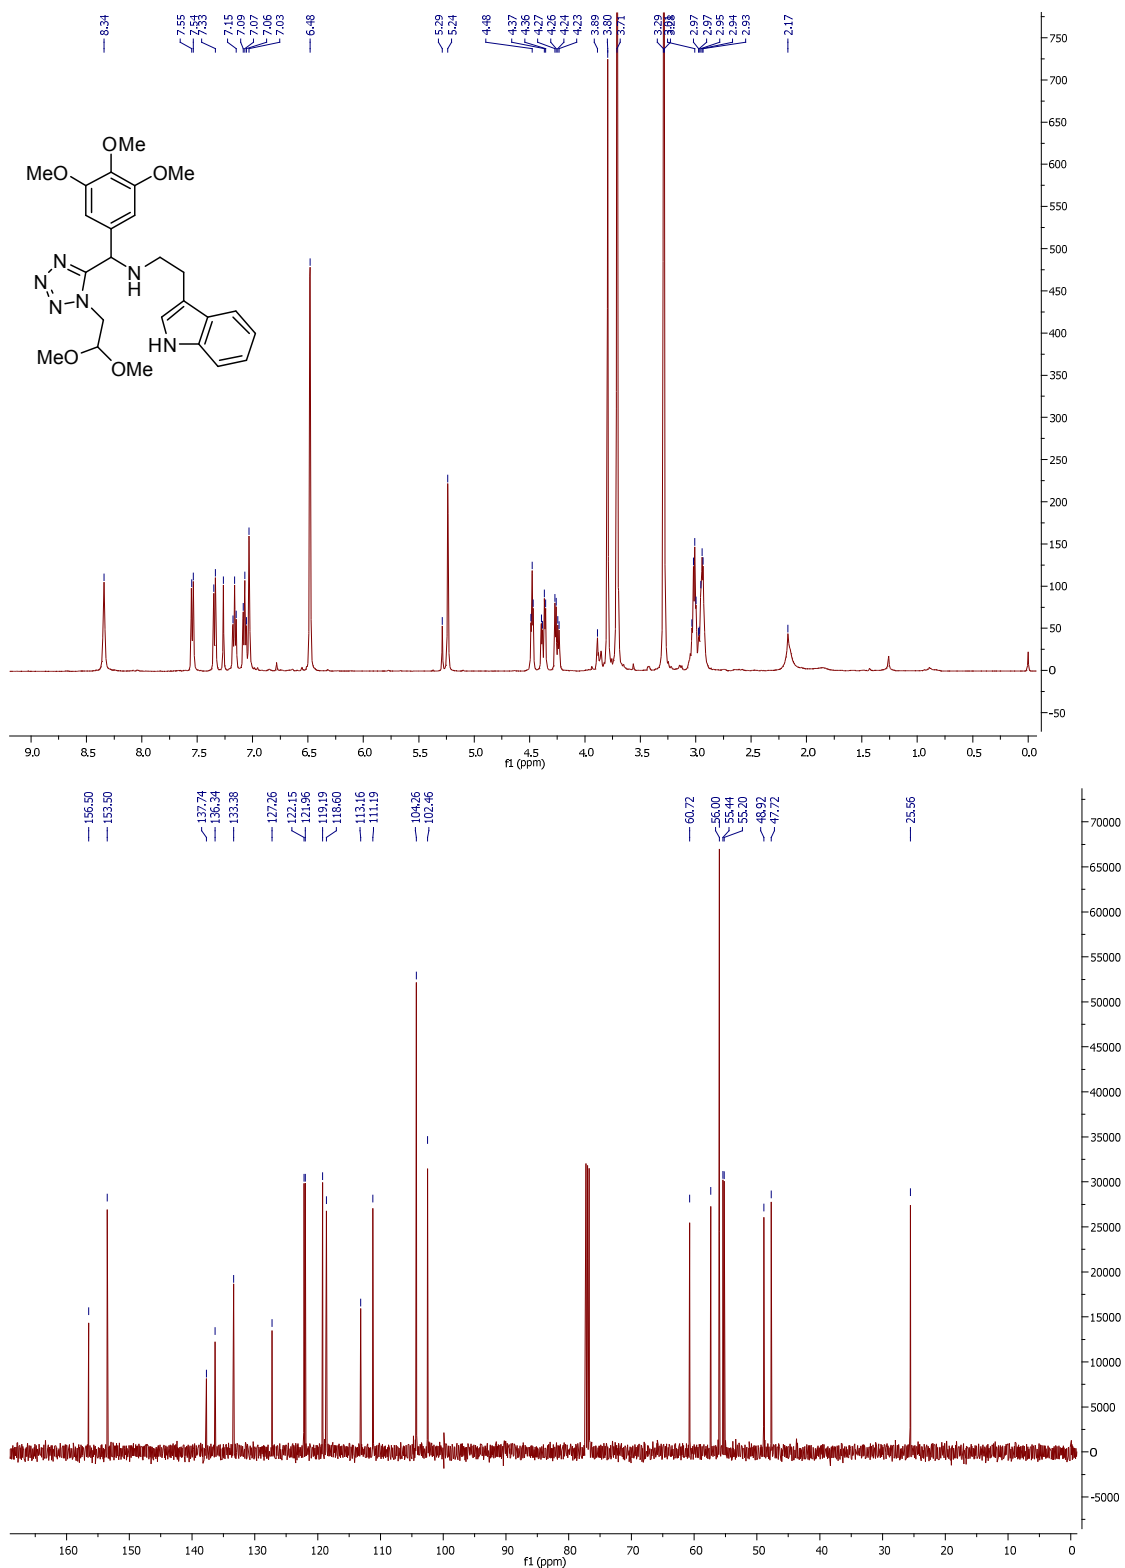

PHP084\_1\_Silica\_4.6X250\_MeOH\_5-30%\_6min

PHP084\_1

3: Diode Array  
Range: 6.344e+1

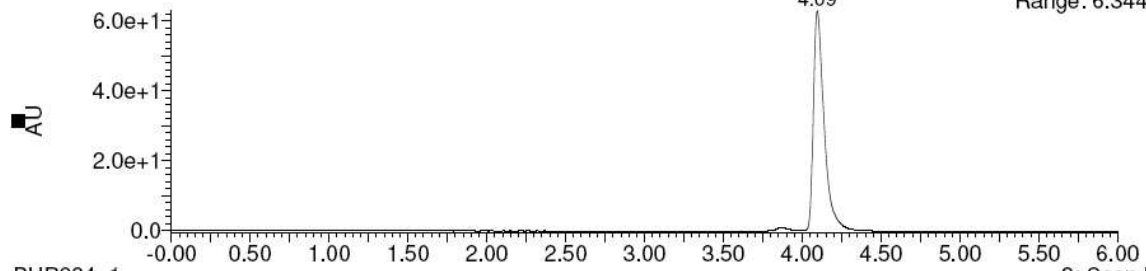

PHP084\_1

2: Scan ES-  
495.24  
1.25e7

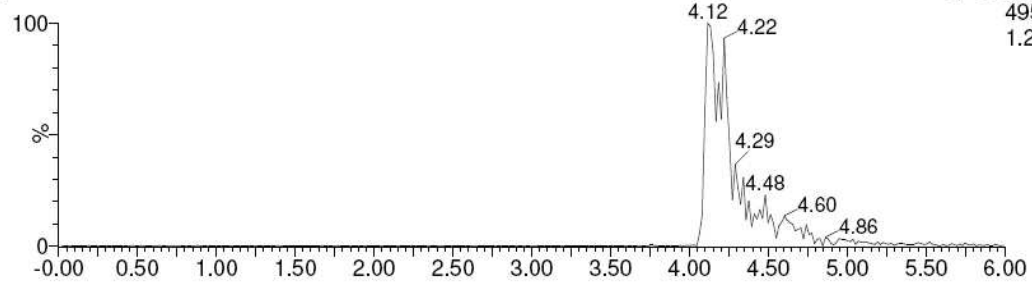

PHP084\_1\_Silica\_4.6X250\_MeOH\_5-30%\_6min

PHP084\_1 238 (4.133)

2: Scan ES-  
1.24e7

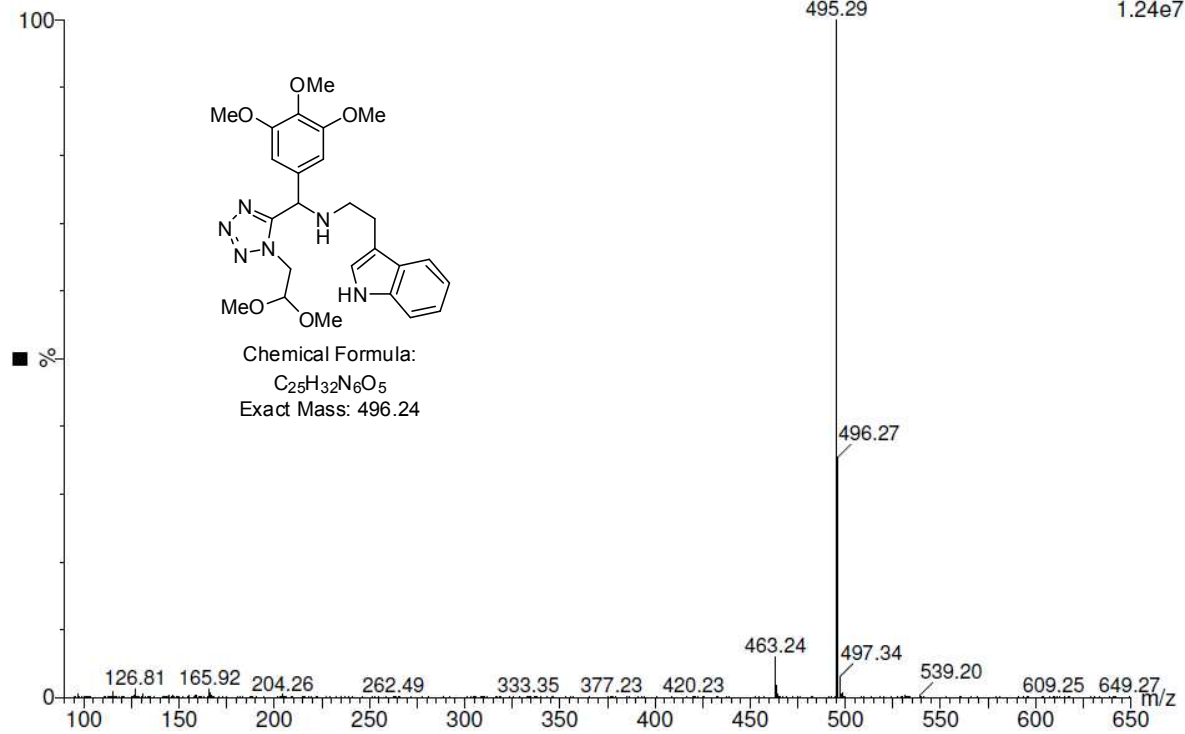

**4g: 4-(3,4,5-trimethoxyphenyl)-4,6,7,12,12b,13-hexahydro-tetrazolo[1'',5'':4',5']  
pyrazino[1',2':1,2]pyrido[3,4-b]indole**

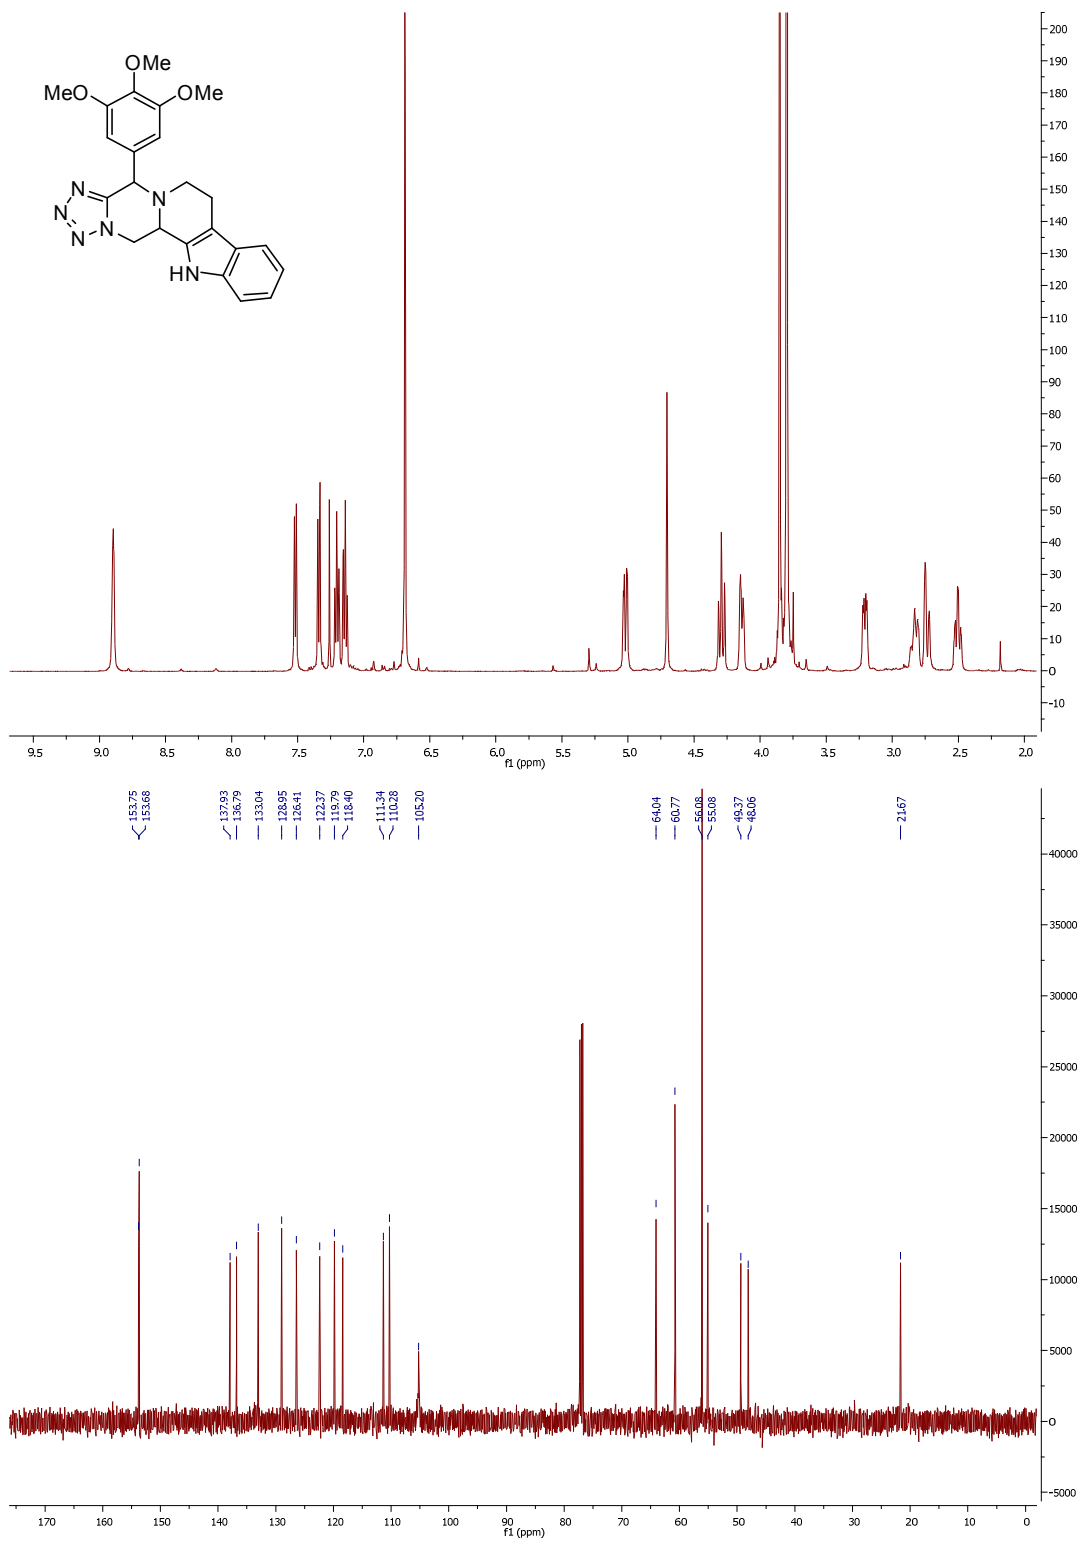

PHP087\_1\_Silica\_4.6X250\_MeOH\_5-30%\_6min

PHP087\_1

3: Diode Array  
Range: 4.828e+1

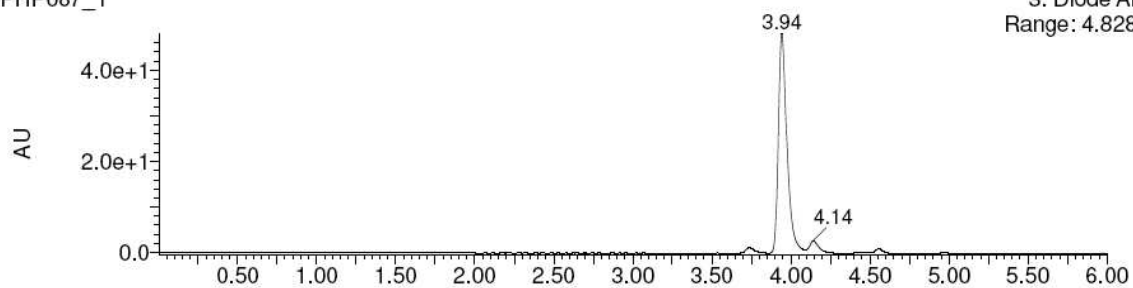

PHP087\_1

2: Scan ES-  
431.19  
1.34e7

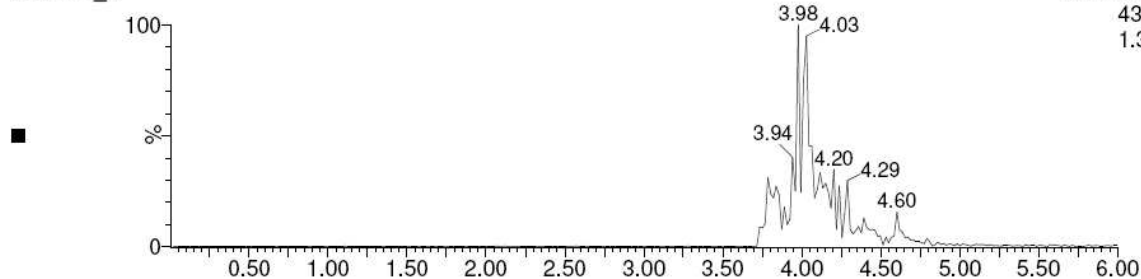

PHP087\_1\_Silica\_4.6X250\_MeOH\_5-30%\_6min

PHP087\_1 232 (4.029)

2: Scan ES-  
1.27e7

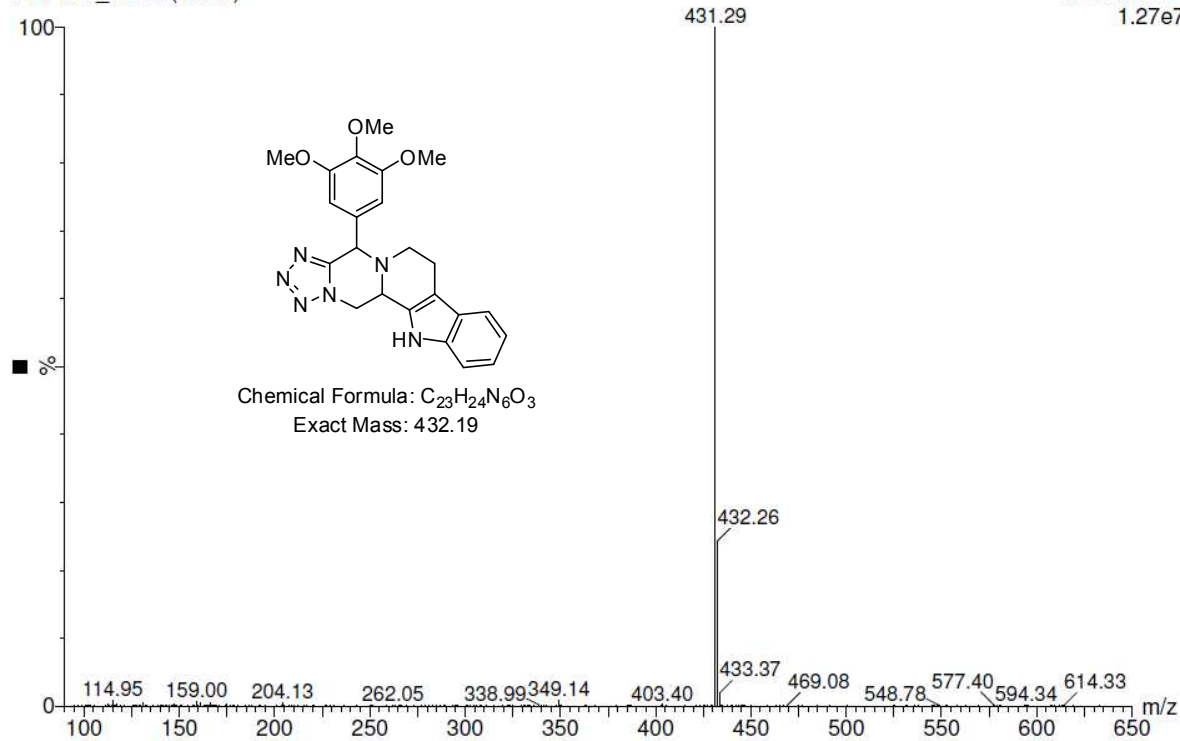



**14h: methyl 2-((1-(1-(2,2-dimethoxyethyl)-1H-tetrazol-5-yl)cyclohexyl)amino)-3-(1H-indol-3-yl)propanoate**

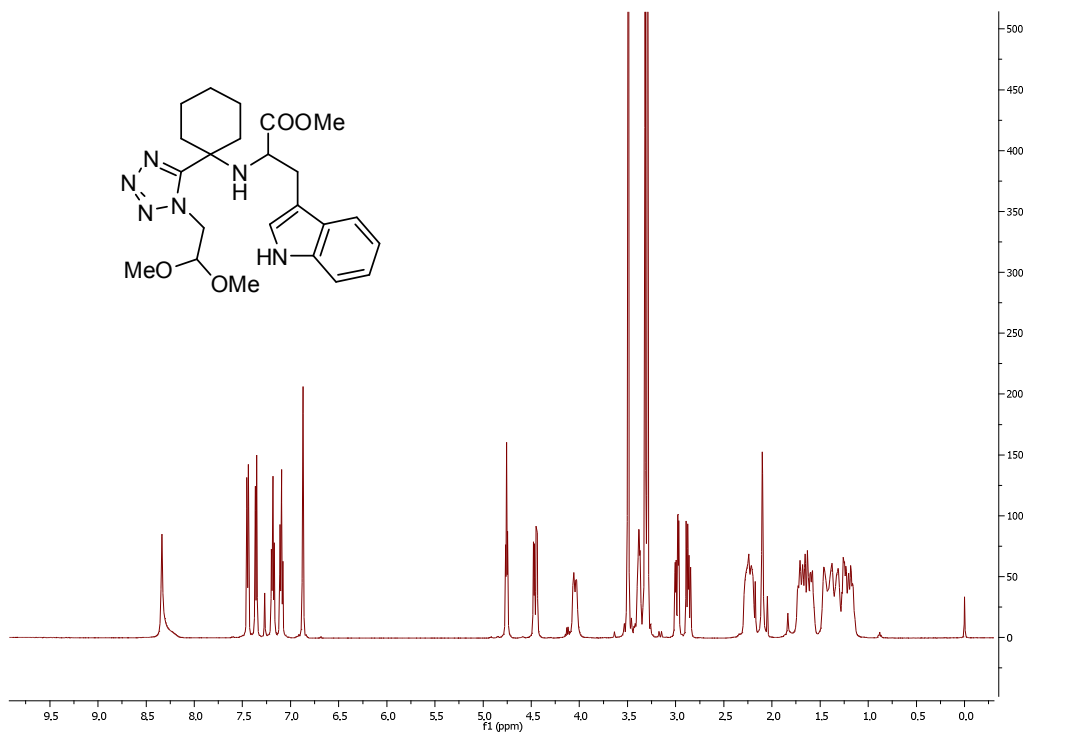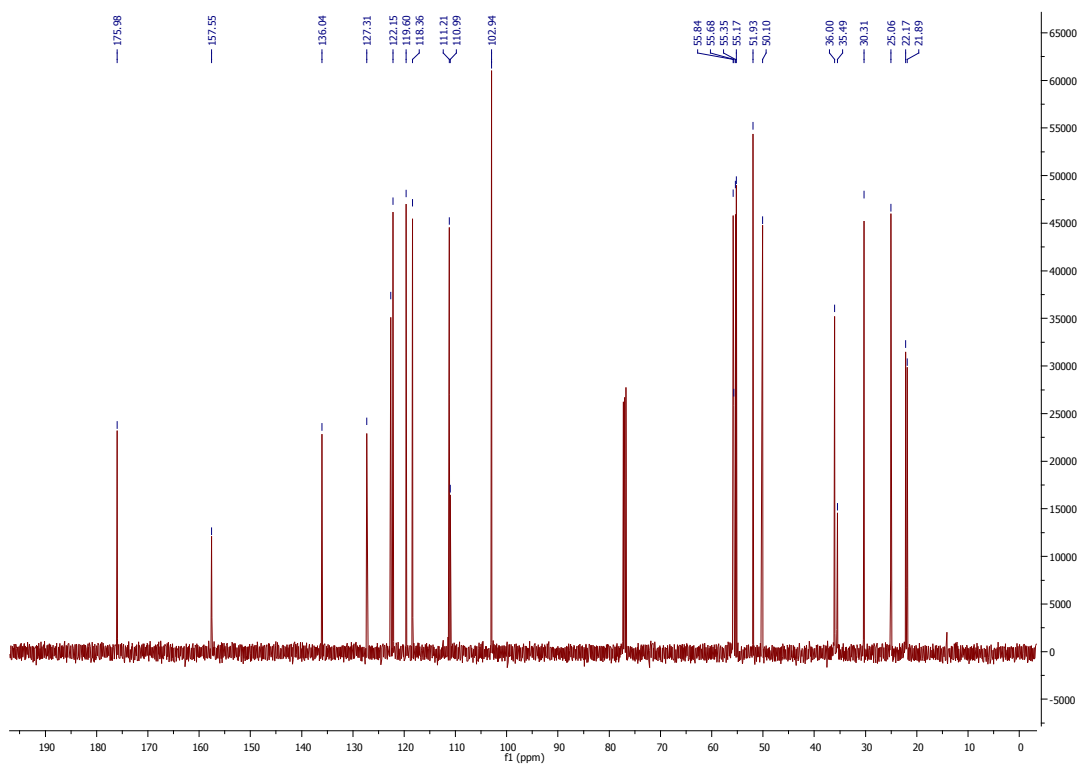

PHP054\_1\_Silica\_4.6X250\_MeOH\_5-30%\_6min  
PHP054\_1

3: Diode Array  
Range: 7.421e+1

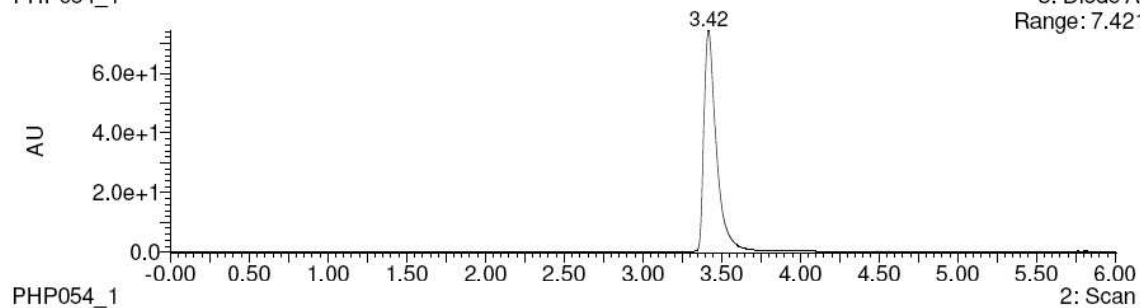

PHP054\_1

2: Scan ES-  
455.25  
1.61e7

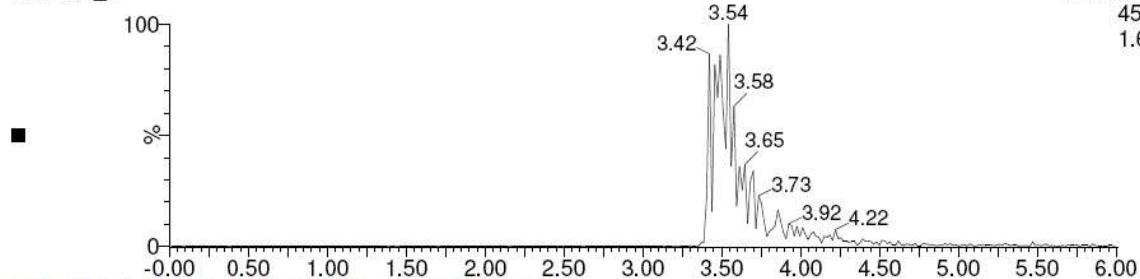

PHP054\_1\_Silica\_4.6X250\_MeOH\_5-30%\_6min  
PHP054\_1 201 (3.491)

2: Scan ES-  
1.39e7

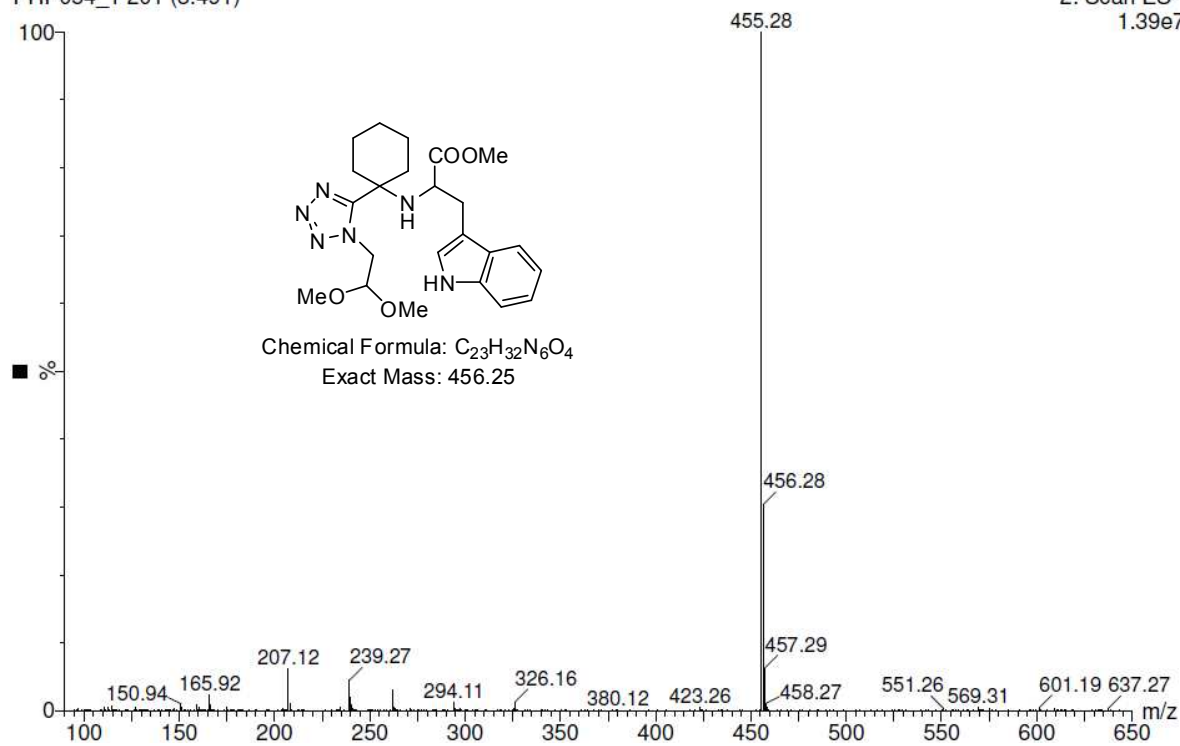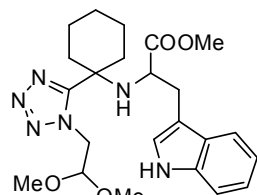

Chemical Formula: C<sub>23</sub>H<sub>32</sub>N<sub>6</sub>O<sub>4</sub>  
Exact Mass: 456.25

**4h: methyl 7',12',12b',13'-tetrahydro-6'H-spiro[cyclohexane-1,4'-tetrazolo  
[1'',5'':4',5']pyrazino[1',2':1,2]pyrido[3,4-b]indole]-6'-carboxylate**

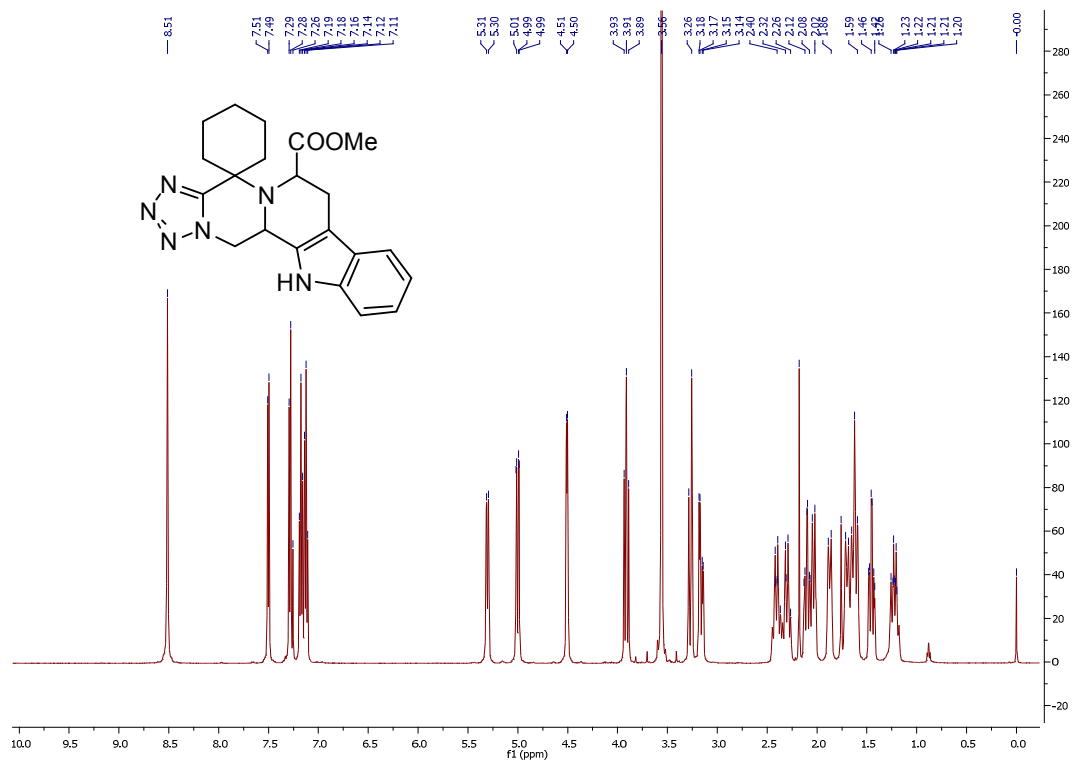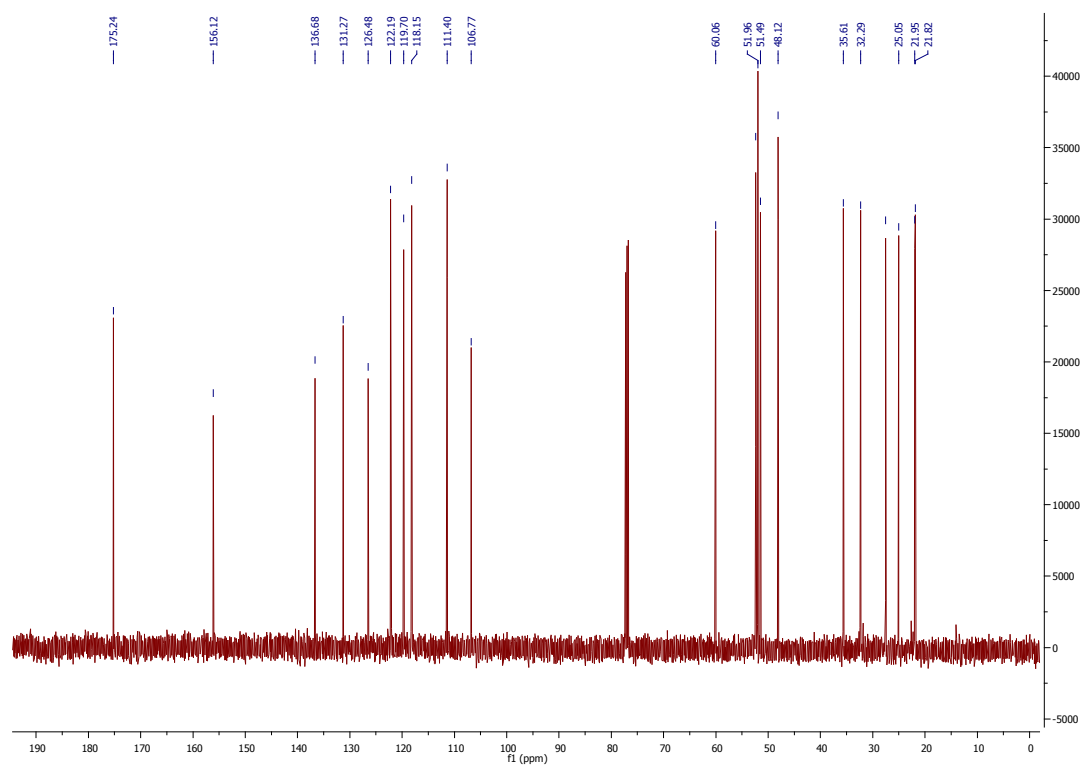

PHP055\_1\_Silica\_4.6X250\_MeOH\_5-30%\_6min  
PHP055\_1

3: Diode Array  
Range: 5.511e+1

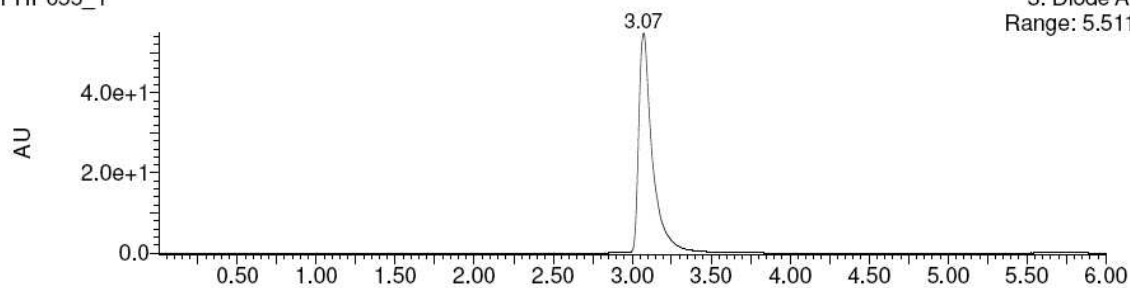

PHP055\_1

2: Scan ES-  
391.2  
2.72e7

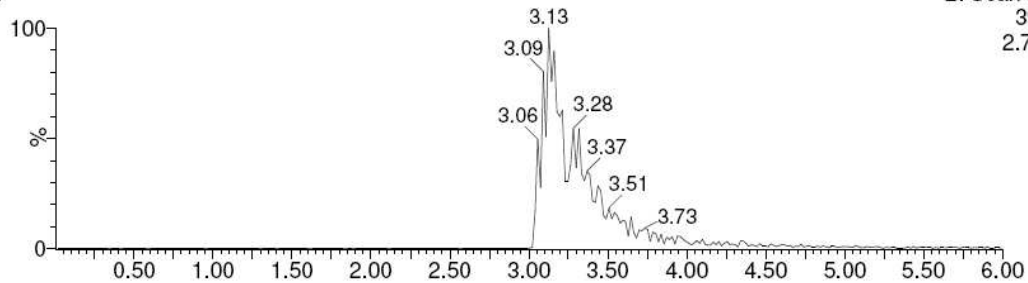

PHP055\_1\_Silica\_4.6X250\_MeOH\_5-30%\_6min  
PHP055\_1 179 (3.108)

2: Scan ES-  
1.39e7

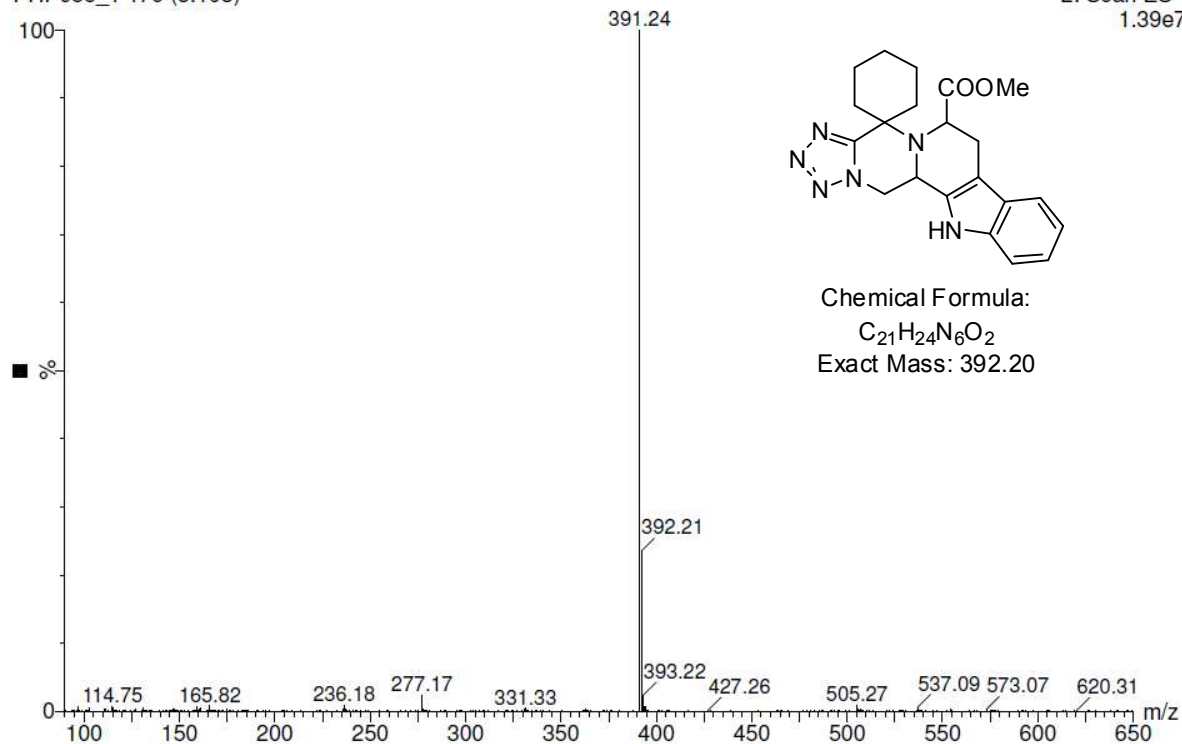

**14i: methyl 2-(((4-chlorophenyl)(1-(2,2-dimethoxyethyl)-1H-tetrazol-5-yl)methyl)amino)-3-(1H-indol-3-yl)propanoate**

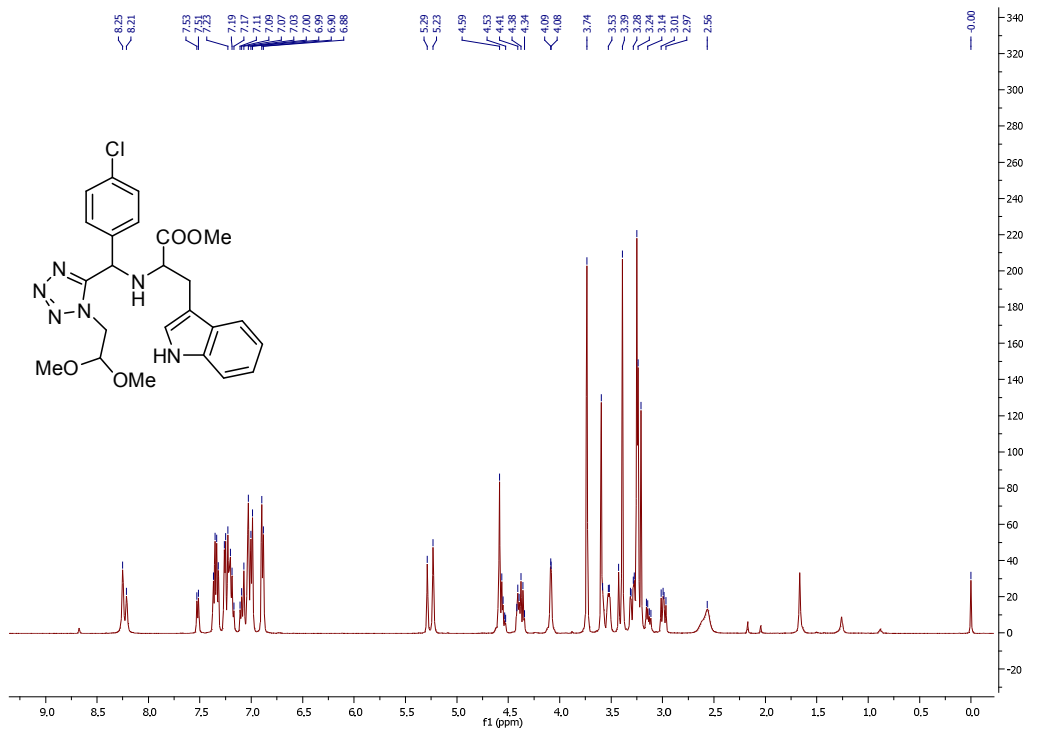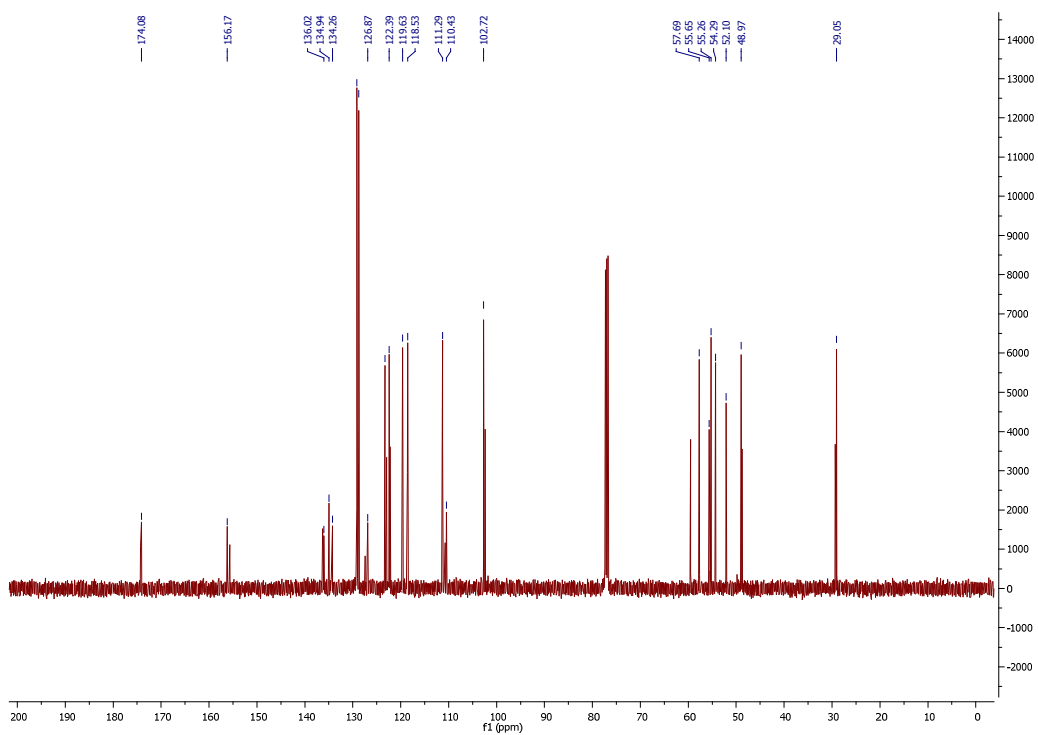

PHP059\_1\_Silica\_4.6X250\_MeOH\_5-30%\_6min

PHP059\_1

3: Diode Array  
Range: 4.666e+1

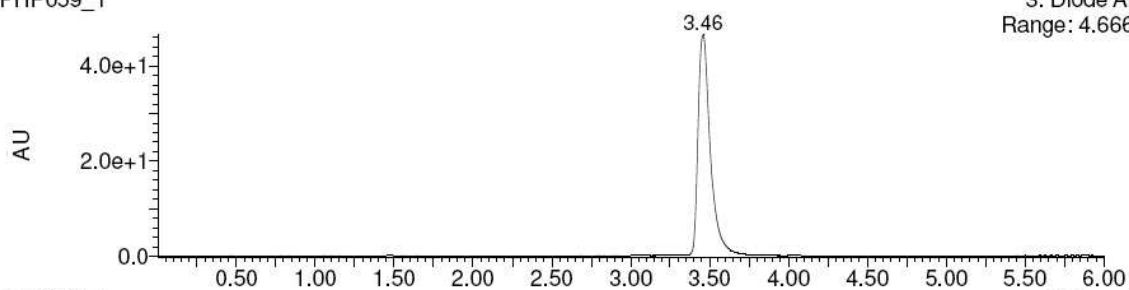

PHP059\_1

2: Scan ES-  
497.18  
2.08e7

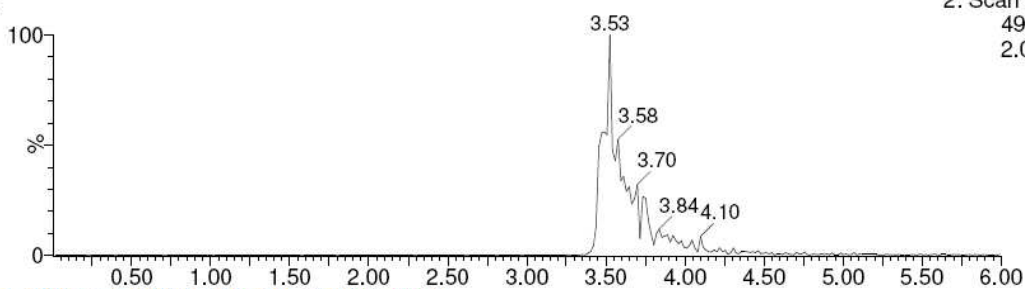

PHP059\_1\_Silica\_4.6X250\_MeOH\_5-30%\_6min

PHP059\_1 201 (3.490)

2: Scan ES-  
1.17e7

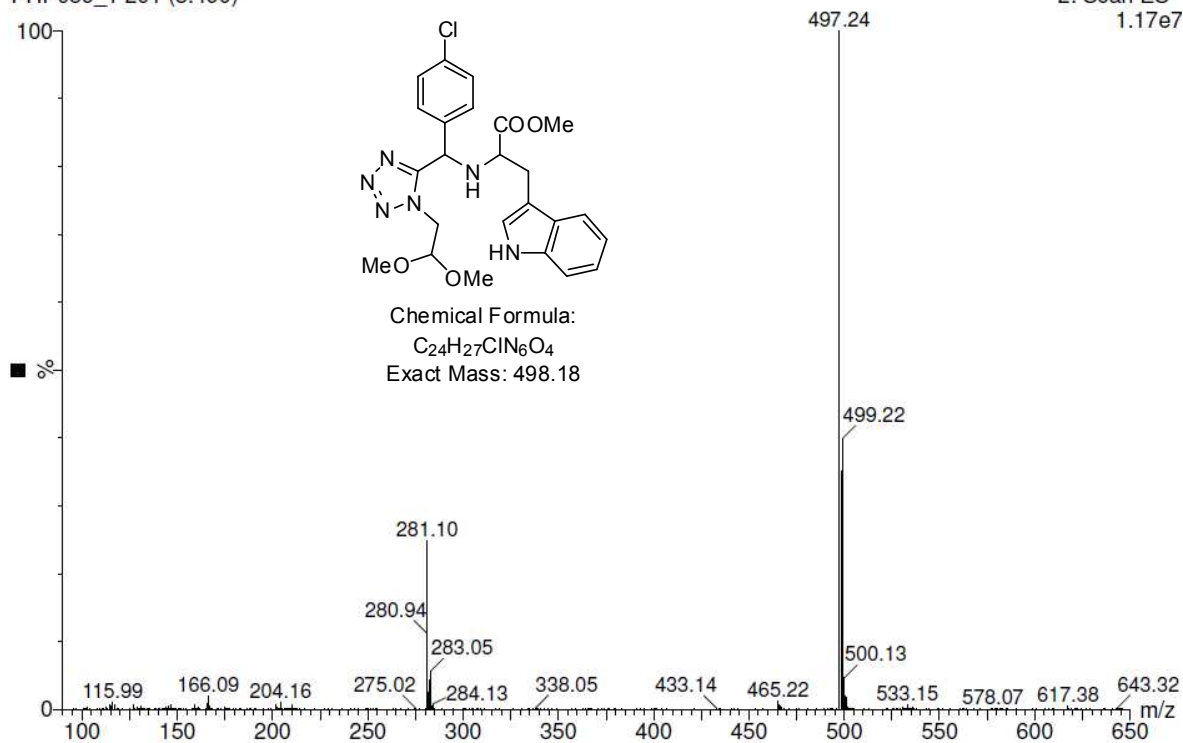

**4i: methyl 4-(4-chlorophenyl)-4,6,7,12,12b,13-hexahydro-1H-tetrazolo[1',5'':4',5']  
pyrazino[1',2':1,2]pyrido[3,4-b]indole-6-carboxylate**

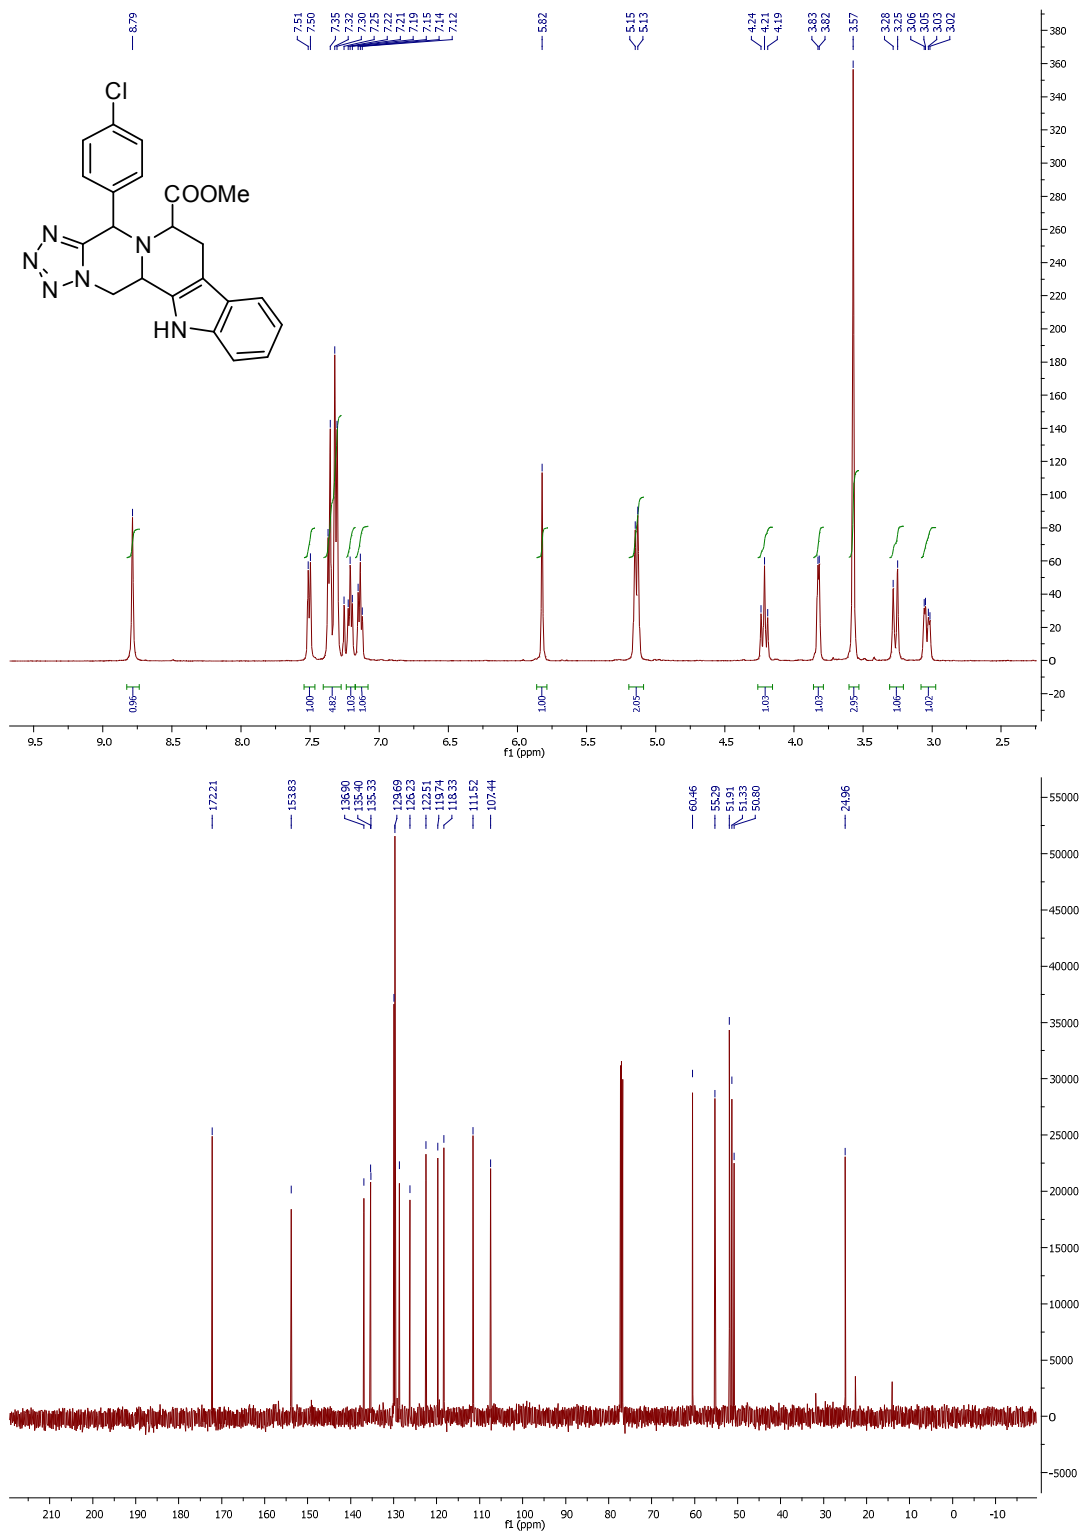

PHP066\_1\_Silica\_4.6X250\_MeOH\_5-30%\_6min

PHP066\_1

3: Diode Array  
Range: 6.279e+1

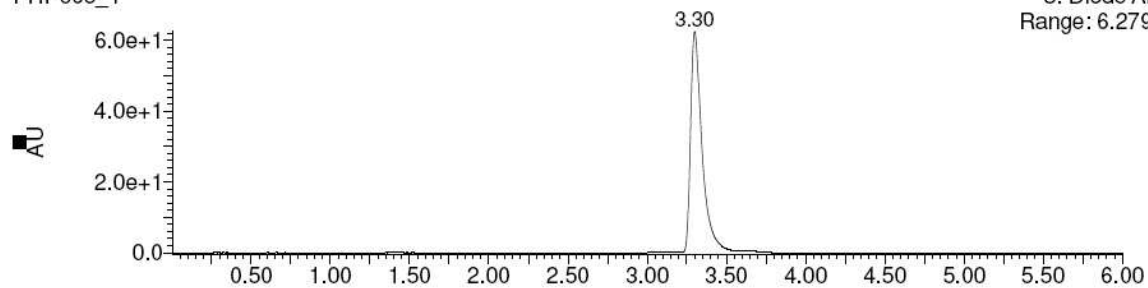

PHP066\_1

2: Scan ES-  
433.13  
1.48e7

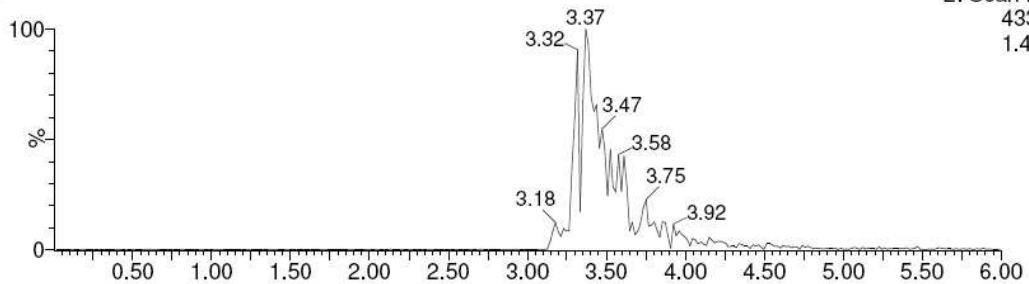

PHP066\_1\_Silica\_4.6X250\_MeOH\_5-30%\_6min

PHP066\_1 196 (3.404)

2: Scan ES-  
1.02e7

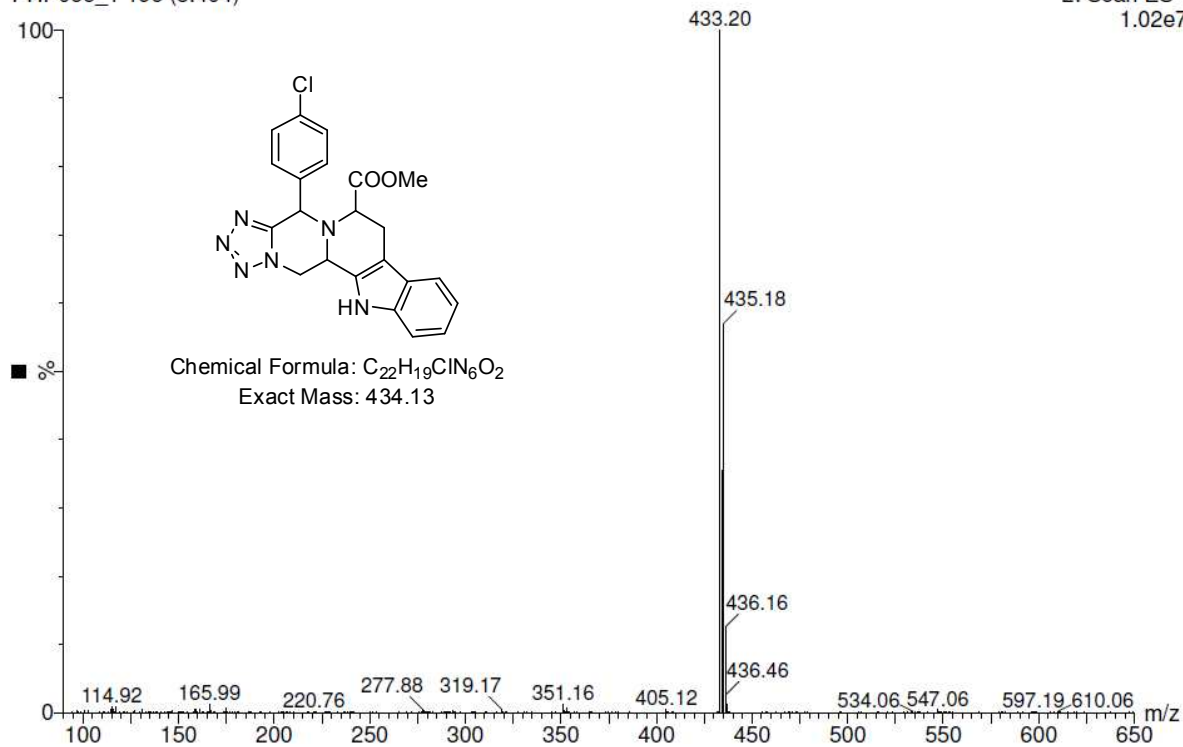



**14j: methyl 2-(((1-(2,2-dimethoxyethyl)-1H-tetrazol-5-yl)(phenyl)methyl)amino)-3-(1H-indol-3-yl)propanoate**

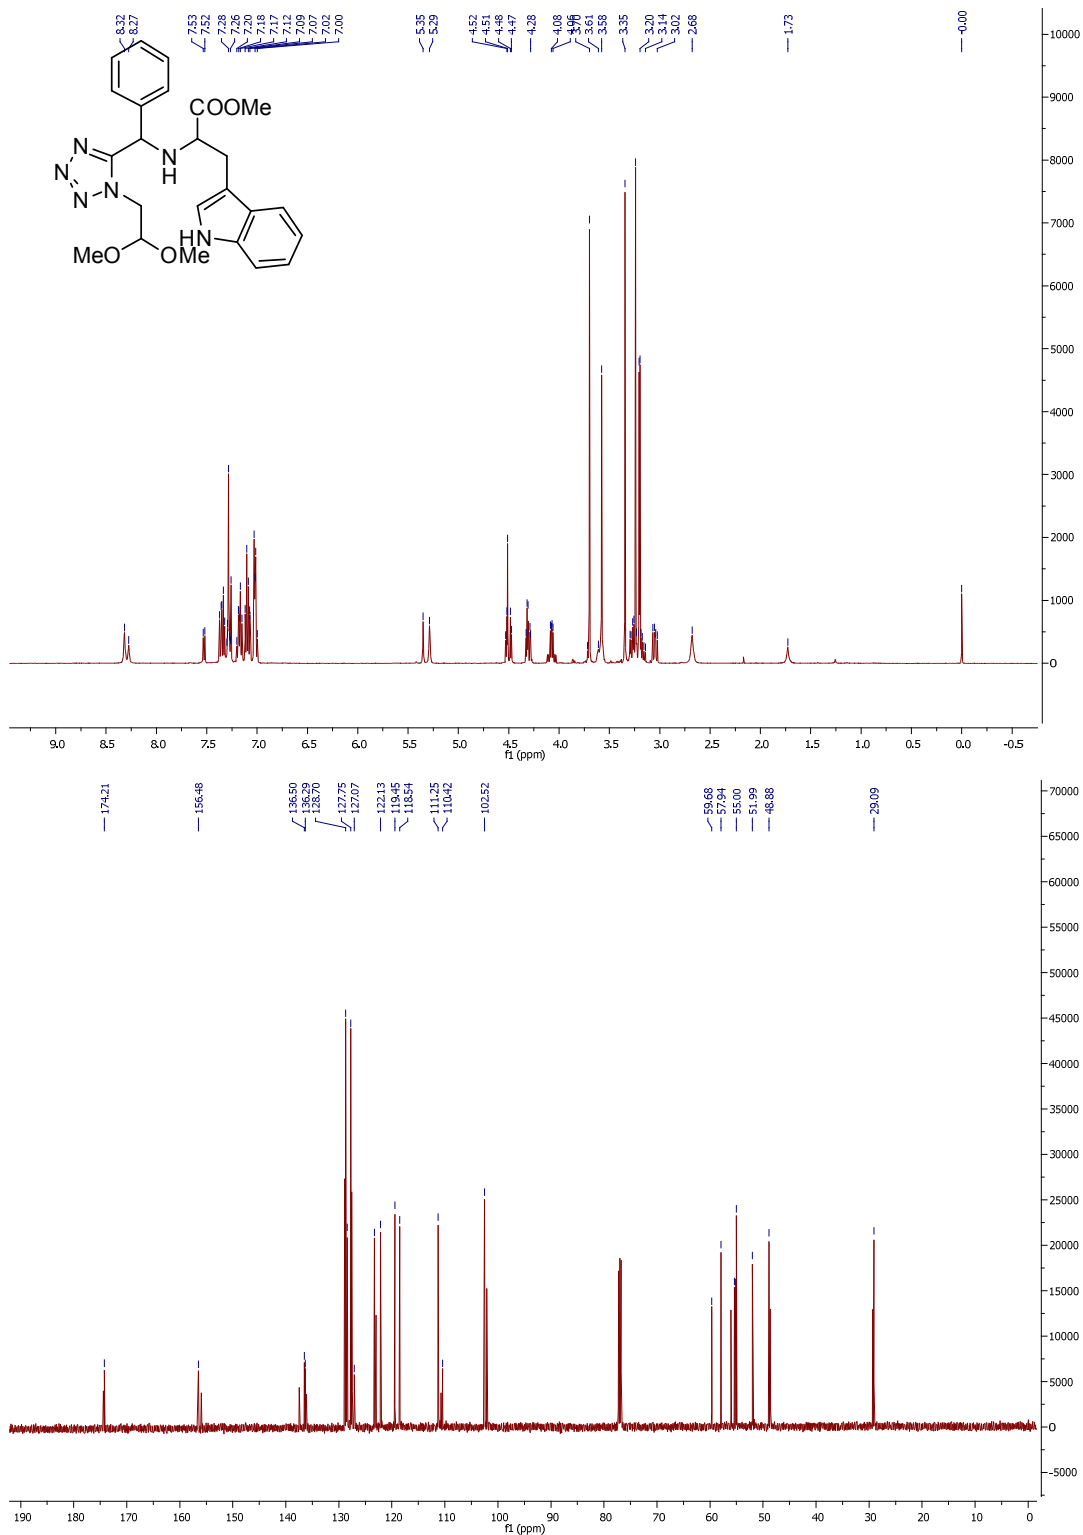

PHP099\_1\_Silica\_4.6X250\_MeOH\_5-30%\_6min

PHP099\_1

3: Diode Array  
Range: 2.357e+

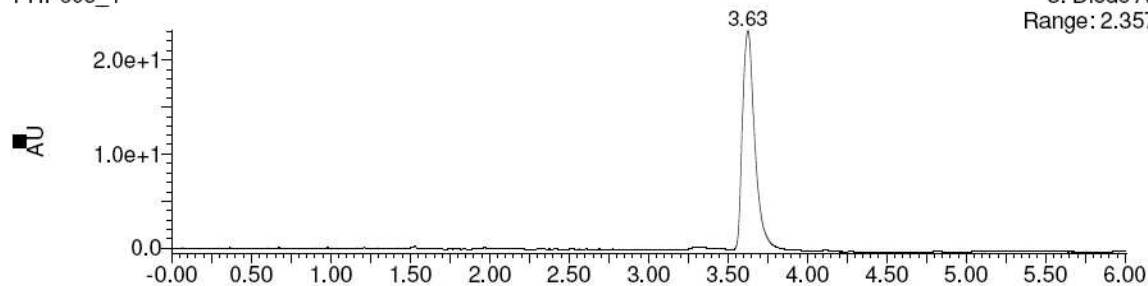

PHP099\_1

2: Scan ES-  
463.22  
9.26e6

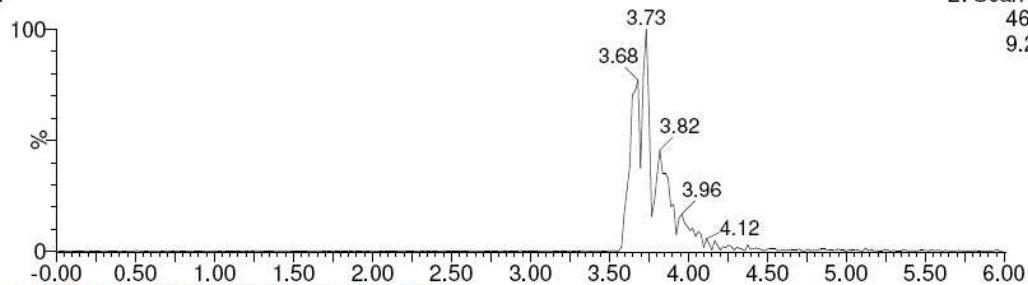

PHP099\_1\_Silica\_4.6X250\_MeOH\_5-30%\_6min

PHP099\_1 209 (3.629)

2: Scan ES-  
3.55e6

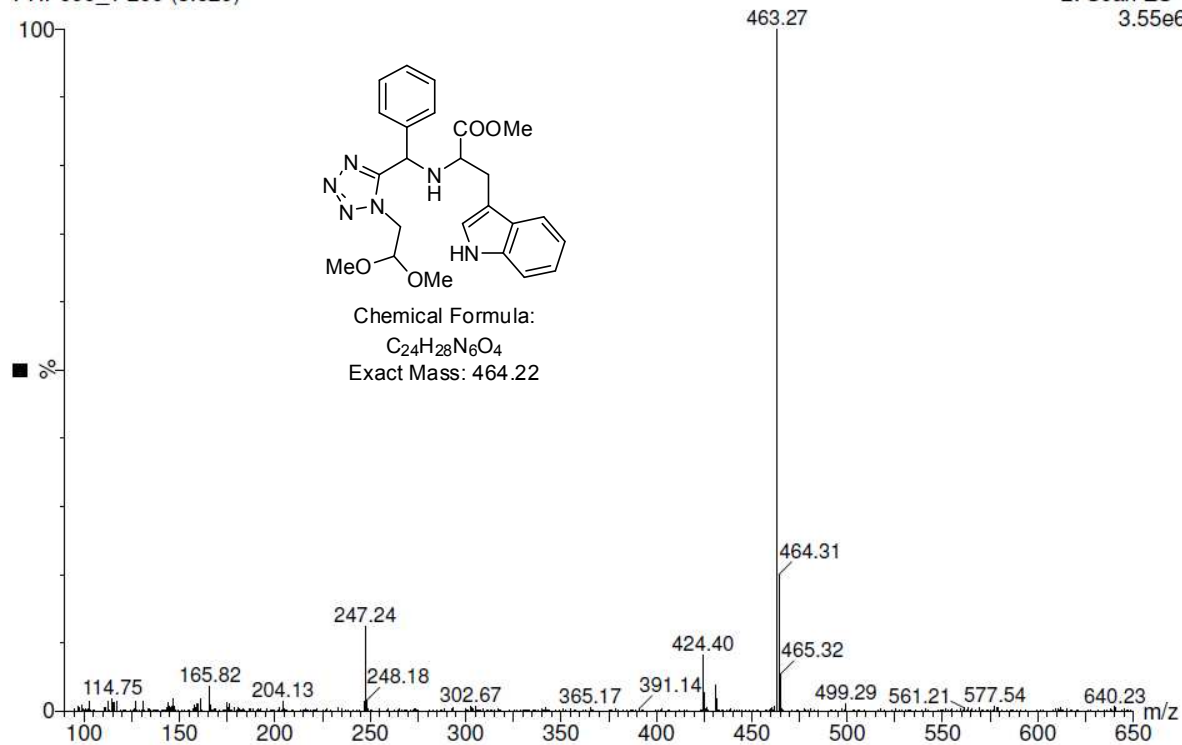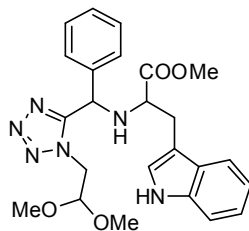

Chemical Formula:  
 $C_{24}H_{28}N_6O_4$   
Exact Mass: 464.22

**4j: methyl 4-phenyl-4,6,7,12,12b,13-hexahydro-tetrazolo[1'',5'':4',5']pyrazino[1',2':1,2]pyrido[3,4-b]indole-6-carboxylate**

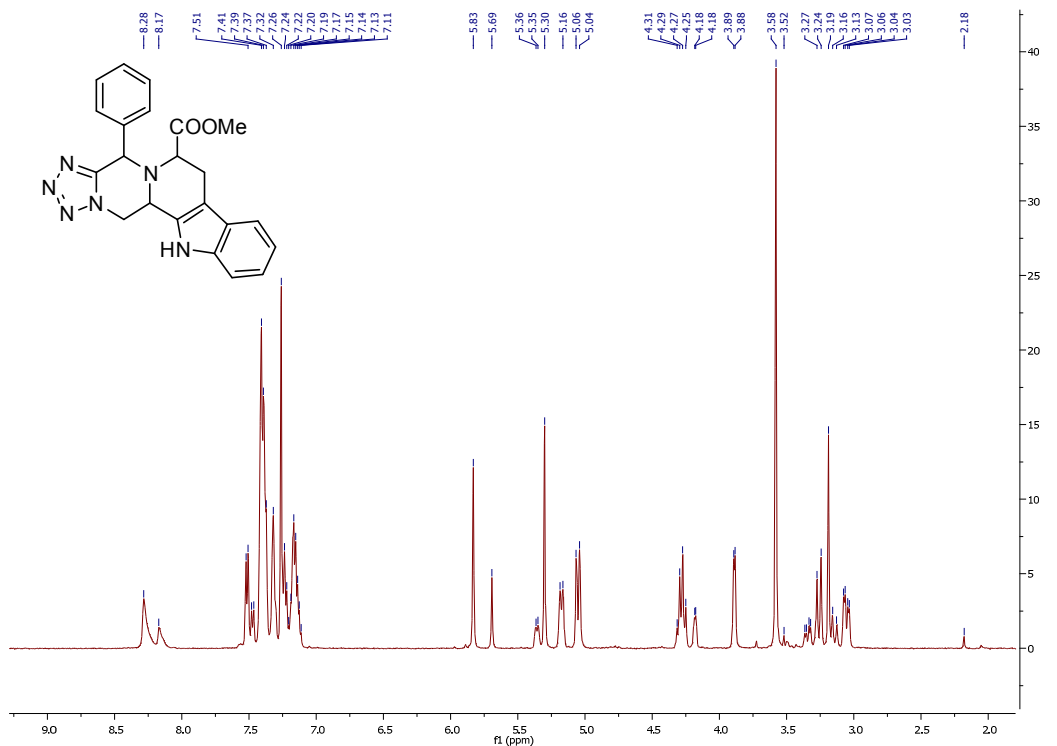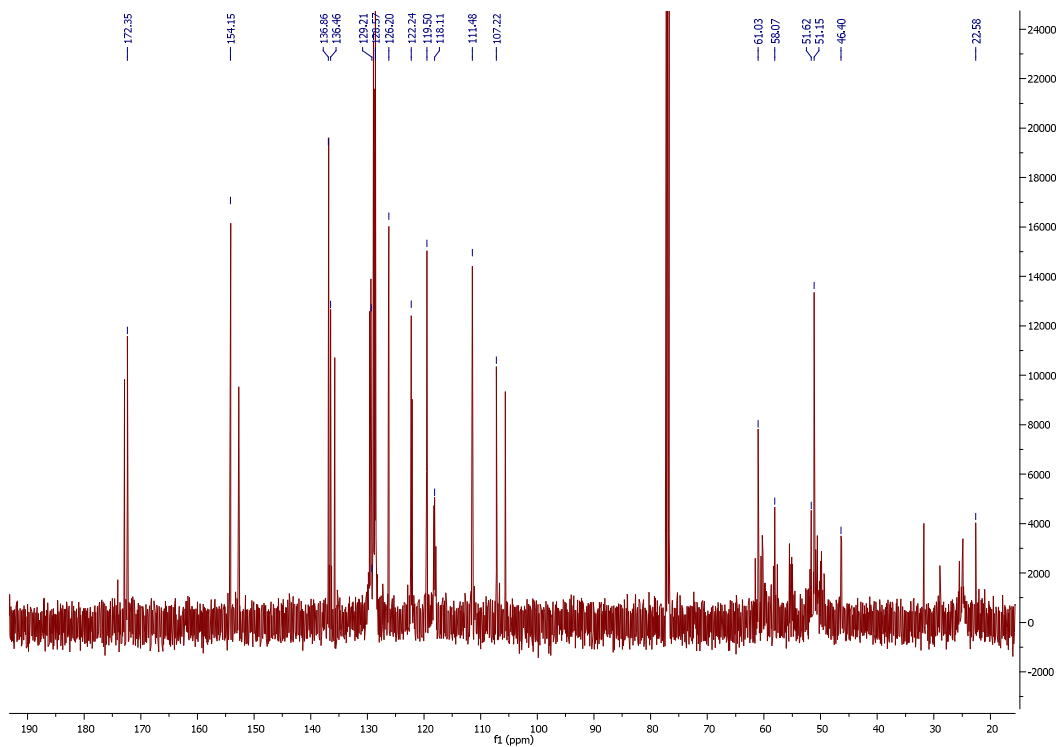

PHP118\_1\_Silica\_4.6X250\_MeOH\_5-30%\_6min

PHP118\_1

3: Diode Array  
Range: 3.618e+1

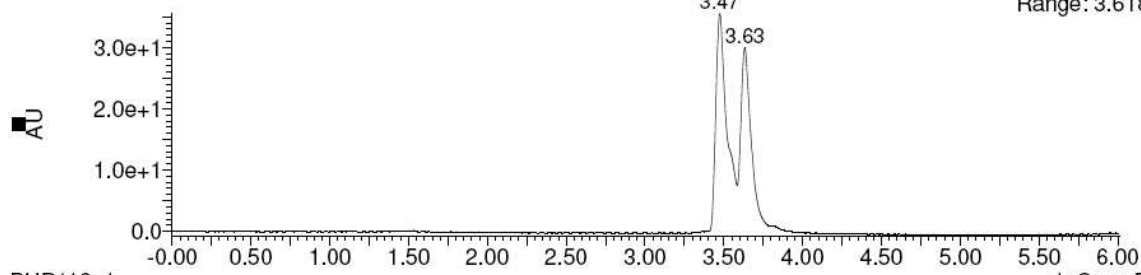

PHP118\_1

1: Scan ES+  
401.17  
2.49e7

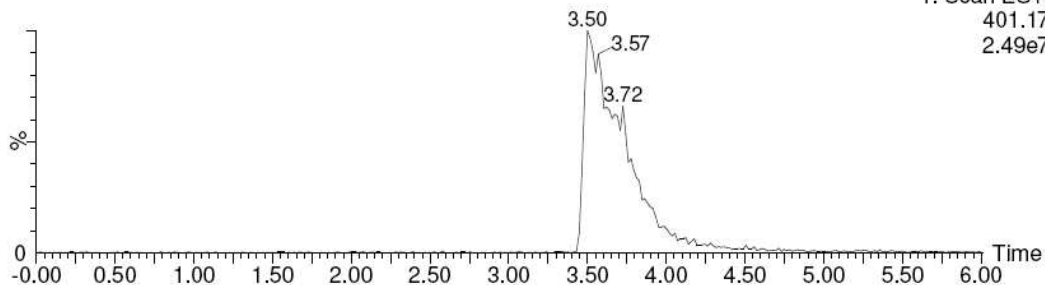

PHP118\_1 203 (3.517)

1: Scan ES+  
2.41e7

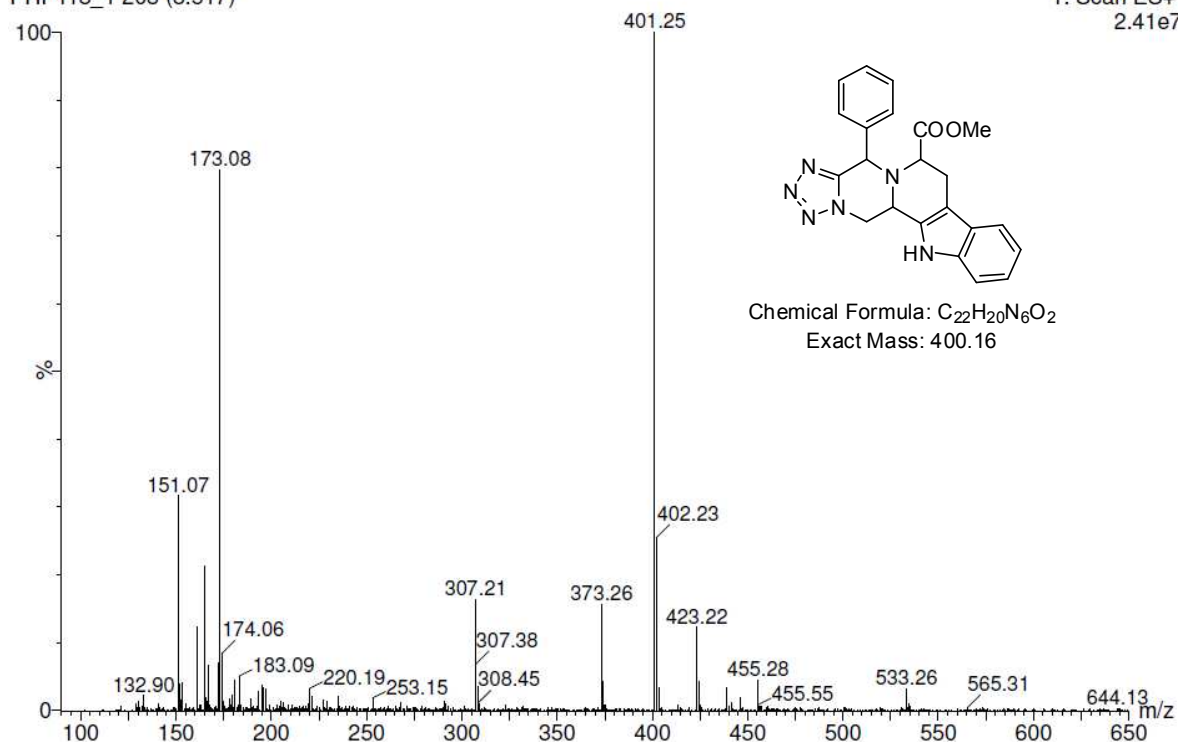

Supplement: ol5024882_si_001.pdf [file ol5024882_si_001.pdf]
